# Supplementary material for: De novo Mutations From Whole Exome Sequencing in Neurodevelopmental and Psychiatric Disorders: From Discovery to Application
Source: Front Genet. 2019 Apr 3;10:258. doi: 10.3389/fgene.2019.00258 (PMC6456656; doi:10.3389/fgene.2019.00258)
Supplement: Supplementary file 1 [file Table_1.XLSX]

## Sheet: Supplymentary Table 1
Supplymentary Table 1. List of common genes in different diseases across genome in WES studies.
Gene ID	Symbol	Susceptible disease	Number of mutation	Type of mutation	Map location	Gene description	Gene type	Human housekeeping genes	Human essential genes	Human TF genes	HSF	Human CAMs	Actin filament bundle assembly gene	FMRP	RBFOX	G2C human PSD	ARC	NMDAR	5-HT2C receptor complex	MP:0004924	MP:0002207	MP:0002272	Voltage-gated calcium channel complexes	CHM	EMB	Developmental delay genes	Syndromic ASD genes	Vulnerable ASD risk genes	ASD, DD neurodevelopmental Risk Genes	ExAC all pLI >=0.9
58508	KMT2C	ASD BD ID/DD SCZ	14	nonsynonymous SNV,stopgain,frameshift deletion,synonymous SNV	7q36.1	lysine methyltransferase 2C	protein-coding	0	1	0	0	0	0	1	0	0	0	0	0	0	0	0	0	0	0	0	1	1	1	1
8216	LZTR1	ASD BD ID/DD SCZ	7	synonymous SNV,nonsynonymous SNV,stopgain	22q11.21|22q11.1-q11.2	leucine zipper like transcription regulator 1	protein-coding	1	0	0	0	0	0	0	0	0	0	0	0	0	0	0	0	0	0	0	0	0	0	0
2737	GLI3	ASD BD ID/DD SCZ	6	nonsynonymous SNV,synonymous SNV,frameshift deletion,frameshift insertion	7p14.1	GLI family zinc finger 3	protein-coding	0	1	1	0	0	0	0	0	0	0	0	0	0	0	0	0	0	0	1	0	1	0	1
1770	DNAH9	ASD BD ID/DD SCZ	7	frameshift insertion,nonsynonymous SNV,synonymous SNV	17p12	dynein axonemal heavy chain 9	protein-coding	0	0	0	0	0	0	0	0	0	0	0	0	0	0	0	0	0	0	0	0	0	0	0
4628	MYH10	ASD ID/DD SCZ	7	nonsynonymous SNV,frameshift deletion,nonframeshift deletion,splice-site mutation	17p13.1	myosin heavy chain 10	protein-coding	0	1	0	0	0	1	1	0	1	0	0	0	1	0	0	0	0	0	1	0	0	0	1
7862	BRPF1	ASD ID/DD SCZ	6	synonymous SNV,nonsynonymous SNV,frameshift insertion,stopgain	3p25.3	bromodomain and PHD finger containing 1	protein-coding	1	0	0	0	0	0	0	0	0	0	0	0	1	0	0	0	1	1	0	0	0	0	1
10129	FRY	ASD ID/DD SCZ	4	nonsynonymous SNV,synonymous SNV	13q13.1	FRY microtubule binding protein	protein-coding	0	0	0	0	0	0	1	1	0	0	0	0	0	0	0	0	0	0	1	0	0	0	1
57338	JPH3	ASD ID/DD SCZ	4	synonymous SNV,nonsynonymous SNV	16q24.2	junctophilin 3	protein-coding	0	0	0	0	0	0	1	0	0	0	0	0	1	0	0	1	0	0	0	0	0	0	1
558	AXL	ASD ID/DD SCZ	3	nonsynonymous SNV,stopgain	19q13.2	AXL receptor tyrosine kinase	protein-coding	0	0	0	0	1	0	0	0	0	0	0	0	0	0	0	0	0	0	0	0	0	0	0
353274	ZNF445	ASD ID/DD SCZ	4	nonsynonymous SNV,synonymous SNV	3p21.31	zinc finger protein 445	protein-coding	0	0	1	0	0	0	0	0	0	0	0	0	0	0	0	0	0	1	0	0	0	0	1
10075	HUWE1	ASD ID/DD SCZ	13	nonsynonymous SNV,synonymous SNV	Xp11.22	HECT, UBA and WWE domain containing 1, E3 ubiquitin protein ligase	protein-coding	1	1	0	0	0	0	1	0	0	0	0	0	0	0	0	0	0	0	0	0	0	0	1
27044	SND1	ASD ID/DD SCZ	3	nonsynonymous SNV	7q32.1	staphylococcal nuclease and tudor domain containing 1	protein-coding	1	0	0	0	0	0	0	0	1	0	0	0	0	0	0	0	1	0	0	0	0	0	1
23225	NUP210	ASD ID/DD SCZ	4	nonsynonymous SNV	3p25.1	nucleoporin 210	protein-coding	0	0	0	0	0	0	0	0	0	0	0	0	0	0	0	0	0	0	0	0	0	0	0
10458	BAIAP2	ASD ID/DD SCZ	4	nonframeshift deletion,nonsynonymous SNV,synonymous SNV	17q25.3	BAI1 associated protein 2	protein-coding	0	0	0	0	0	1	0	0	1	1	0	0	1	1	0	0	0	0	0	0	0	0	0
55959	SULF2	ASD ID/DD SCZ	4	nonsynonymous SNV,synonymous SNV	20q13.12	sulfatase 2	protein-coding	0	1	0	0	0	0	0	0	0	0	0	0	0	0	0	0	0	0	0	0	0	0	0
50831	TAS2R3	ASD ID/DD SCZ	3	nonsynonymous SNV,nonframeshift deletion	7q34	taste 2 receptor member 3	protein-coding	0	0	0	0	0	0	0	0	0	0	0	0	0	0	0	0	0	0	0	0	0	0	0
8857	FCGBP	ASD ID/DD SCZ	6	nonsynonymous SNV,synonymous SNV	19q13.2	Fc fragment of IgG binding protein	protein-coding	0	0	0	0	0	0	0	0	0	0	0	0	0	0	0	0	0	0	0	0	0	0	0
1146	CHRNG	ASD ID/DD SCZ	4	synonymous SNV,stopgain,nonsynonymous SNV	2q37.1	cholinergic receptor nicotinic gamma subunit	protein-coding	0	1	0	0	0	0	0	0	0	0	0	0	1	0	0	0	0	0	1	0	0	0	0
84444	DOT1L	ASD ID/DD SCZ	5	nonsynonymous SNV,stopgain,frameshift deletion,synonymous SNV	19p13.3	DOT1 like histone lysine methyltransferase	protein-coding	0	1	0	0	0	0	1	0	0	0	0	0	0	0	0	0	1	0	0	0	1	0	1
7272	TTK	ASD ID/DD SCZ	3	nonsynonymous SNV,stopgain	6q14.1	TTK protein kinase	protein-coding	0	0	0	0	0	0	0	0	0	0	0	0	0	0	0	0	0	1	0	0	0	0	0
57448	BIRC6	ASD ID/DD SCZ	8	nonsynonymous SNV,stopgain,synonymous SNV	2p22.3	baculoviral IAP repeat containing 6	protein-coding	0	1	0	0	0	0	1	0	1	0	0	0	0	0	0	0	0	1	0	0	0	0	1
23499	MACF1	ASD ID/DD SCZ	3	nonsynonymous SNV	1p34.3	microtubule-actin crosslinking factor 1	protein-coding	0	0	0	0	0	0	0	0	1	0	0	0	0	0	0	0	0	0	0	0	1	0	1
4928	NUP98	ASD ID/DD SCZ	3	nonsynonymous SNV,synonymous SNV	11p15.4	nucleoporin 98	protein-coding	0	1	0	0	0	0	1	1	0	0	0	0	0	0	0	0	1	0	0	0	0	0	1
81794	ADAMTS10	ASD ID/DD SCZ	3	nonsynonymous SNV,nonframeshift deletion	19p13.2	ADAM metallopeptidase with thrombospondin type 1 motif 10	protein-coding	0	0	0	0	0	0	0	0	0	0	0	0	0	0	0	0	0	0	0	0	0	0	1
11011	TLK2	ASD ID/DD SCZ	10	nonsynonymous SNV,frameshift deletion,splice-site mutation,stopgain	17q23.2	tousled like kinase 2	protein-coding	0	0	0	0	0	0	0	0	0	0	0	0	0	0	0	0	0	0	1	0	0	0	1
51332	SPTBN5	ASD ID/DD SCZ	7	nonsynonymous SNV,synonymous SNV	15q15.1	spectrin beta, non-erythrocytic 5	protein-coding	0	0	0	0	0	0	0	0	0	0	0	0	0	0	0	0	0	0	0	0	0	0	0
3096	HIVEP1	ASD ID/DD SCZ	5	nonsynonymous SNV,synonymous SNV	6p24.1	human immunodeficiency virus type I enhancer binding protein 1	protein-coding	1	0	1	0	0	0	1	0	0	0	0	0	0	0	0	0	0	0	0	0	0	0	1
63895	PIEZO2	ASD ID/DD SCZ	4	nonsynonymous SNV,synonymous SNV	18p11.22-p11.21	piezo type mechanosensitive ion channel component 2	protein-coding	0	0	0	0	0	0	0	1	0	0	0	0	0	0	0	0	0	0	1	0	0	0	0
347240	KIF24	ASD ID/DD SCZ	4	nonsynonymous SNV	9p13.3	kinesin family member 24	protein-coding	0	0	0	0	0	0	0	0	0	0	0	0	0	0	0	0	0	0	0	0	0	0	0
4629	MYH11	ASD ID/DD SCZ	4	nonsynonymous SNV,synonymous SNV	16p13.11	myosin heavy chain 11	protein-coding	0	1	0	0	0	0	0	1	1	0	0	0	0	0	0	0	0	0	0	0	0	0	1
92799	SHKBP1	ASD ID/DD SCZ	3	nonsynonymous SNV,synonymous SNV	19q13.2	SH3KBP1 binding protein 1	protein-coding	0	0	0	0	0	0	0	0	0	0	0	0	0	0	0	0	0	0	0	0	0	0	0
10771	ZMYND11	ASD ID/DD SCZ	9	frameshift deletion,splice-site mutation,nonsynonymous SNV,nonframeshift deletion	10p15.3	zinc finger MYND-type containing 11	protein-coding	1	0	0	0	0	0	0	0	0	0	0	0	0	0	0	0	1	0	1	0	1	0	1
22827	PUF60	ASD ID/DD SCZ	12	nonsynonymous SNV,frameshift deletion,frameshift insertion,nonframeshift insertion,splice-site mutation,synonymous SNV,stopgain	8q24.3	poly(U) binding splicing factor 60	protein-coding	1	0	0	0	0	0	0	0	0	0	0	0	0	0	0	0	0	0	1	0	0	0	0
84059	ADGRV1	ASD ID/DD SCZ	6	synonymous SNV,nonsynonymous SNV	5q14.3	adhesion G protein-coupled receptor V1	protein-coding	0	0	0	0	0	0	0	0	0	0	0	0	1	0	0	0	0	0	0	0	0	0	0
9639	ARHGEF10	ASD ID/DD SCZ	3	nonsynonymous SNV,synonymous SNV	8p23.3	Rho guanine nucleotide exchange factor 10	protein-coding	0	0	0	0	0	1	0	0	0	0	0	0	0	0	0	0	0	0	0	0	0	0	0
128853	DUSP15	ASD ID/DD SCZ	3	nonsynonymous SNV	20q11.21	dual specificity phosphatase 15	protein-coding	0	0	0	0	0	0	0	0	0	0	0	0	0	0	0	0	0	0	0	0	0	0	0
2775	GNAO1	ASD ID/DD SCZ	11	nonsynonymous SNV,nonframeshift deletion,splice-site mutation	16q13	G protein subunit alpha o1	protein-coding	0	1	0	0	0	0	1	0	1	0	0	0	1	0	0	0	0	0	1	0	0	0	1
80210	ARMC9	ASD ID/DD SCZ	3	synonymous SNV,nonsynonymous SNV	2q37.1	armadillo repeat containing 9	protein-coding	0	0	0	0	0	0	0	0	0	0	0	0	0	0	0	0	0	0	1	0	0	0	0
4703	NEB	ASD ID/DD SCZ	8	nonsynonymous SNV,stopgain,nonframeshift deletion,synonymous SNV	2q23.3	nebulin	protein-coding	0	1	0	0	0	0	0	1	0	0	0	0	1	0	0	0	0	0	1	0	0	0	0
7273	TTN	ASD ID/DD SCZ	39	nonsynonymous SNV,synonymous SNV,stopgain,splice-site mutation	2q31.2	titin	protein-coding	0	1	0	0	0	0	0	1	0	0	0	0	0	0	0	0	0	0	1	0	0	0	0
10142	AKAP9	ASD ID/DD SCZ	6	nonsynonymous SNV,stopgain,frameshift deletion	7q21.2	A-kinase anchoring protein 9	protein-coding	1	0	0	0	0	0	1	1	1	0	0	0	0	0	0	0	0	1	0	0	0	0	0
9739	SETD1A	ASD ID/DD SCZ	8	splice-site mutation,synonymous SNV,nonsynonymous SNV,nonframeshift deletion	16p11.2	SET domain containing 1A	protein-coding	0	0	0	0	0	0	0	0	0	0	0	0	1	0	0	0	1	0	1	0	0	0	1
9882	TBC1D4	ASD ID/DD SCZ	5	synonymous SNV,nonsynonymous SNV	13q22.2	TBC1 domain family member 4	protein-coding	0	0	0	0	0	0	0	1	0	0	0	0	0	0	0	0	0	0	0	0	0	0	0
5361	PLXNA1	ASD ID/DD SCZ	7	nonsynonymous SNV,synonymous SNV	3q21.3	plexin A1	protein-coding	0	0	0	0	0	0	1	0	1	0	0	0	0	0	0	0	0	0	0	0	1	0	1
55770	EXOC2	ASD ID/DD SCZ	4	synonymous SNV,nonsynonymous SNV	6p25.3	exocyst complex component 2	protein-coding	1	0	0	0	0	0	0	0	1	0	0	0	0	0	0	0	0	1	0	0	0	0	0
11218	DDX20	ASD ID/DD SCZ	3	nonsynonymous SNV	1p13.2	DEAD-box helicase 20	protein-coding	0	1	0	0	0	0	0	0	0	0	0	0	0	0	0	0	0	0	0	0	0	0	0
55187	VPS13D	ASD ID/DD SCZ	7	nonsynonymous SNV,stopgain	1p36.22-p36.21	vacuolar protein sorting 13 homolog D	protein-coding	0	1	0	0	0	0	1	1	0	0	0	0	0	0	0	0	0	0	0	0	0	0	1
2783	GNB2	ASD ID/DD SCZ	3	nonsynonymous SNV	7q22.1	G protein subunit beta 2	protein-coding	1	0	0	0	0	0	0	0	1	0	1	0	0	0	0	0	0	0	0	0	0	0	1
57680	CHD8	ASD ID/DD SCZ	13	stopgain,frameshift deletion,nonsynonymous SNV,nonframeshift deletion,splice-site mutation,synonymous SNV	14q11.2	chromodomain helicase DNA binding protein 8	protein-coding	1	1	0	0	0	0	1	0	0	0	0	0	0	0	0	0	1	0	1	1	1	1	1
1826	DSCAM	ASD ID/DD SCZ	7	nonsynonymous SNV,synonymous SNV,splice-site mutation,frameshift insertion,stopgain	21q22.2	DS cell adhesion molecule	protein-coding	0	1	0	0	1	0	1	0	0	0	0	0	1	0	0	0	0	0	1	1	1	1	1
8452	CUL3	ASD ID/DD SCZ	8	nonsynonymous SNV,stopgain,frameshift deletion,stoploss,synonymous SNV	2q36.2	cullin 3	protein-coding	0	1	0	0	0	1	0	0	0	0	0	0	0	0	0	0	0	1	0	0	1	1	1
94239	H2AFV	ASD ID/DD SCZ	3	nonsynonymous SNV	7p13	H2A histone family member V	protein-coding	1	0	0	0	0	0	0	0	0	0	0	0	0	0	0	0	0	0	0	0	0	0	0
83992	CTTNBP2	ASD ID/DD SCZ	4	synonymous SNV,frameshift deletion,nonsynonymous SNV	7q31.31	cortactin binding protein 2	protein-coding	0	0	0	0	0	0	0	0	1	0	0	0	0	0	0	0	0	1	0	0	0	0	0
9612	NCOR2	ASD ID/DD SCZ	6	nonsynonymous SNV,synonymous SNV	12q24.31	nuclear receptor corepressor 2	protein-coding	0	1	0	0	0	0	1	0	0	0	0	0	1	0	0	0	0	0	0	0	1	0	1
63035	BCORL1	ASD ID/DD SCZ	4	nonsynonymous SNV,splice-site mutation	Xq26.1	BCL6 corepressor like 1	protein-coding	0	0	0	0	0	0	0	0	0	0	0	0	0	0	0	0	0	1	0	0	0	0	1
57721	METTL14	ASD ID/DD SCZ	3	nonsynonymous SNV	4q26	methyltransferase like 14	protein-coding	1	0	0	0	0	0	0	0	0	0	0	0	0	0	0	0	0	1	0	0	0	0	0
6453	ITSN1	ASD ID/DD SCZ	3	stopgain,nonsynonymous SNV	21q22.11	intersectin 1	protein-coding	0	1	0	0	0	0	1	0	1	0	0	0	1	0	0	1	0	0	0	0	0	0	1
726	CAPN5	ASD ID/DD SCZ	4	nonsynonymous SNV,synonymous SNV	11q13.5	calpain 5	protein-coding	0	1	0	0	0	0	0	0	0	0	0	0	1	0	0	0	0	0	0	0	0	0	0
4846	NOS3	ASD ID/DD SCZ	3	nonsynonymous SNV,stopgain	7q36.1	nitric oxide synthase 3	protein-coding	0	1	0	0	0	0	0	0	0	0	0	0	1	0	0	0	0	0	0	0	0	0	0
116986	AGAP2	ASD ID/DD SCZ	9	synonymous SNV,nonsynonymous SNV	12q14.1	ArfGAP with GTPase domain, ankyrin repeat and PH domain 2	protein-coding	0	0	0	0	0	0	1	0	1	0	0	0	0	0	0	1	0	0	0	0	0	0	1
55628	ZNF407	ASD ID/DD SCZ	4	frameshift insertion,nonsynonymous SNV,synonymous SNV	18q22.3	zinc finger protein 407	protein-coding	0	0	1	0	0	0	0	0	0	0	0	0	0	0	0	0	0	0	0	0	0	0	1
3888	KRT82	ASD ID/DD SCZ	4	nonsynonymous SNV,synonymous SNV	12q13.13	keratin 82	protein-coding	0	0	0	0	0	0	0	0	0	0	0	0	0	0	0	0	0	0	0	0	0	0	0
23334	SZT2	ASD ID/DD SCZ	4	frameshift insertion,nonsynonymous SNV	1p34.2	SZT2, KICSTOR complex subunit	protein-coding	0	1	0	0	0	0	0	0	0	0	0	0	1	0	0	0	0	0	1	0	0	0	0
114571	SLC22A9	ASD ID/DD SCZ	5	nonsynonymous SNV,synonymous SNV	11q12.3	solute carrier family 22 member 9	protein-coding	0	0	0	0	0	0	0	0	0	0	0	0	0	0	0	0	0	0	0	0	0	0	0
6601	SMARCC2	ASD ID/DD SCZ	5	frameshift deletion,splice-site mutation,nonframeshift deletion,nonsynonymous SNV	12q13.2	SWI/SNF related, matrix associated, actin dependent regulator of chromatin subfamily c member 2	protein-coding	0	0	0	0	0	0	1	0	0	0	0	0	0	0	0	0	1	0	0	0	1	0	1
26173	INTS1	ASD ID/DD SCZ	5	nonsynonymous SNV,frameshift deletion	7p22.3	integrator complex subunit 1	protein-coding	1	1	0	0	0	0	1	0	0	0	0	0	0	0	0	0	0	0	0	0	0	0	0
22874	PLEKHA6	ASD ID/DD SCZ	4	nonsynonymous SNV,synonymous SNV	1q32.1	pleckstrin homology domain containing A6	protein-coding	0	0	0	0	0	0	0	1	1	0	0	0	0	0	0	0	0	0	0	0	0	0	1
84033	OBSCN	ASD ID/DD SCZ	18	nonsynonymous SNV,synonymous SNV	1q42.13	obscurin, cytoskeletal calmodulin and titin-interacting RhoGEF	protein-coding	0	0	0	0	0	0	0	0	0	0	0	0	0	0	0	0	0	0	0	0	0	0	0
9875	URB1	ASD ID/DD SCZ	4	nonsynonymous SNV,stopgain	21q22.11	URB1 ribosome biogenesis 1 homolog (S. cerevisiae)	protein-coding	0	0	0	0	0	0	0	0	0	0	0	0	0	0	0	0	0	0	0	0	0	0	0
286046	XKR6	ASD ID/DD SCZ	3	nonsynonymous SNV,stopgain	8p23.1	XK related 6	protein-coding	0	0	0	0	0	0	0	0	0	0	0	0	0	0	0	0	0	0	0	0	1	0	1
23126	POGZ	ASD ID/DD SCZ	23	nonsynonymous SNV,frameshift deletion,frameshift insertion,stopgain,synonymous SNV,splice-site mutation	1q21.3	pogo transposable element derived with ZNF domain	protein-coding	0	0	0	0	0	0	0	0	0	0	0	0	0	0	0	0	0	1	1	1	1	1	1
91746	YTHDC1	ASD ID/DD SCZ	4	frameshift insertion,frameshift deletion,nonframeshift deletion,nonsynonymous SNV	4q13.2	YTH domain containing 1	protein-coding	1	0	0	0	0	0	0	1	0	0	0	0	0	0	0	0	0	0	0	0	0	0	1
7096	TLR1	ASD ID/DD SCZ	3	synonymous SNV	4p14	toll like receptor 1	protein-coding	0	0	0	0	0	0	0	0	0	0	0	0	0	0	0	0	0	0	0	0	0	0	0
8454	CUL1	ASD ID/DD SCZ	3	nonsynonymous SNV,splice-site mutation	7q36.1	cullin 1	protein-coding	1	1	0	0	0	0	0	0	0	0	0	0	0	0	0	0	0	1	0	0	1	0	1
114784	CSMD2	ASD ID/DD SCZ	5	nonsynonymous SNV,frameshift deletion,synonymous SNV	1p35.1	CUB and Sushi multiple domains 2	protein-coding	0	0	0	0	0	0	0	0	0	0	0	0	0	0	0	0	0	0	0	0	1	0	0
57644	MYH7B	ASD ID/DD SCZ	4	splice-site mutation,synonymous SNV,nonsynonymous SNV,frameshift deletion	20q11.22	myosin heavy chain 7B	protein-coding	0	0	0	0	0	0	0	0	0	0	0	0	0	0	0	0	0	0	0	0	0	0	0
283316	CD163L1	ASD ID/DD SCZ	4	nonsynonymous SNV,frameshift insertion	12p13.31	CD163 molecule like 1	protein-coding	0	0	0	0	0	0	0	0	0	0	0	0	0	0	0	0	0	0	0	0	0	0	0
1612	DAPK1	ASD ID/DD SCZ	3	synonymous SNV,nonsynonymous SNV	9q21.33	death associated protein kinase 1	protein-coding	0	0	0	0	0	0	1	0	0	0	0	0	0	0	0	0	0	0	0	0	0	0	1
10290	SPEG	ASD ID/DD SCZ	6	nonsynonymous SNV,synonymous SNV	2q35	SPEG complex locus	protein-coding	0	0	0	0	0	0	1	0	0	0	0	0	0	0	0	0	0	0	1	0	0	0	1
1756	DMD	ASD ID/DD SCZ	4	nonsynonymous SNV,synonymous SNV,frameshift insertion	Xp21.2-p21.1	dystrophin	protein-coding	0	1	0	0	0	0	0	0	1	0	0	0	1	0	0	0	0	0	1	0	0	0	1
55567	DNAH3	ASD ID/DD SCZ	8	synonymous SNV,nonsynonymous SNV	16p12.3	dynein axonemal heavy chain 3	protein-coding	0	0	0	0	0	0	0	0	0	0	0	0	0	0	0	1	0	0	0	0	0	0	0
132884	EVC2	ASD ID/DD SCZ	4	nonsynonymous SNV	4p16.2	EvC ciliary complex subunit 2	protein-coding	0	0	0	0	0	0	0	0	0	0	0	0	0	0	0	0	0	0	1	0	0	0	0
27243	CHMP2A	ASD ID/DD SCZ	3	nonsynonymous SNV,frameshift insertion	19q13.43	charged multivesicular body protein 2A	protein-coding	1	0	0	0	0	0	0	0	0	0	0	0	0	0	0	0	0	0	0	0	0	0	1
2475	MTOR	ASD ID/DD SCZ	4	nonsynonymous SNV	1p36.22	mechanistic target of rapamycin kinase	protein-coding	0	1	0	0	0	1	1	0	0	0	0	0	0	0	0	0	0	0	0	0	0	0	1
5087	PBX1	ASD ID/DD SCZ	5	nonsynonymous SNV,frameshift deletion	1q23.3	PBX homeobox 1	protein-coding	0	1	1	0	0	0	0	0	0	0	0	0	1	0	0	0	0	1	0	0	0	0	1
11113	CIT	ASD ID/DD SCZ	4	nonsynonymous SNV	12q24.23	citron rho-interacting serine/threonine kinase	protein-coding	0	1	0	0	0	0	1	0	0	0	0	0	1	0	0	0	0	0	0	0	0	0	1
79718	TBL1XR1	ASD ID/DD SCZ	13	nonsynonymous SNV,frameshift deletion,frameshift insertion	3q26.32	transducin beta like 1 X-linked receptor 1	protein-coding	0	0	0	0	0	0	0	0	0	0	0	0	0	0	0	0	0	0	1	0	0	1	1
2895	GRID2	ASD ID/DD SCZ	3	nonsynonymous SNV	4q22.1-q22.2	glutamate ionotropic receptor delta type subunit 2	protein-coding	0	1	0	0	0	0	0	0	1	0	0	0	1	0	1	1	0	0	0	0	0	0	1
6002	RGS12	ASD ID/DD SCZ	5	nonsynonymous SNV	4p16.3	regulator of G protein signaling 12	protein-coding	0	0	0	0	0	0	0	0	0	0	0	0	0	0	0	0	0	0	0	0	0	0	0
5797	PTPRM	ASD ID/DD SCZ	5	nonsynonymous SNV,synonymous SNV	18p11.23	protein tyrosine phosphatase, receptor type M	protein-coding	0	0	0	0	1	0	0	1	0	0	0	0	0	0	0	0	0	0	0	0	0	0	1
4588	MUC6	ASD ID/DD SCZ	5	nonsynonymous SNV,synonymous SNV	11p15.5	mucin 6, oligomeric mucus/gel-forming	protein-coding	0	0	0	0	0	0	0	0	0	0	0	0	0	0	0	0	0	0	0	0	0	0	0
22895	RPH3A	ASD ID/DD SCZ	5	synonymous SNV,nonsynonymous SNV	12q24.13	rabphilin 3A	protein-coding	0	0	0	0	0	0	1	0	0	0	0	0	0	0	0	1	1	0	0	0	0	0	0
6262	RYR2	ASD ID/DD SCZ	15	synonymous SNV,nonsynonymous SNV	1q43	ryanodine receptor 2	protein-coding	0	1	0	0	0	0	1	1	1	0	0	0	1	0	1	0	0	0	0	0	0	0	1
4627	MYH9	ASD ID/DD SCZ	11	splice-site mutation,nonsynonymous SNV,synonymous SNV	22q12.3	myosin heavy chain 9	protein-coding	0	1	0	0	0	0	0	0	1	0	0	0	0	0	0	0	0	0	1	0	1	0	1
22906	TRAK1	ASD ID/DD SCZ	4	nonsynonymous SNV,frameshift deletion,synonymous SNV	3p22.1	trafficking kinesin protein 1	protein-coding	0	0	0	0	0	0	1	0	0	0	0	0	1	0	0	0	0	0	0	0	0	0	0
9874	TLK1	ASD ID/DD SCZ	3	frameshift deletion,nonsynonymous SNV	2q31.1	tousled like kinase 1	protein-coding	1	0	0	0	0	0	0	0	0	0	0	0	0	0	0	0	0	0	0	0	0	0	1
6326	SCN2A	ASD ID/DD SCZ	40	splice-site mutation,stopgain,nonsynonymous SNV,frameshift insertion,frameshift deletion	2q24.3	sodium voltage-gated channel alpha subunit 2	protein-coding	0	1	0	0	0	0	1	1	1	0	0	0	1	0	1	1	0	0	1	0	1	1	1
3320	HSP90AA1	ASD ID/DD SCZ	3	frameshift insertion,nonsynonymous SNV	14q32.31	heat shock protein 90 alpha family class A member 1	protein-coding	0	0	0	0	0	0	0	0	0	0	0	0	0	0	0	0	0	0	0	0	0	0	0
79633	FAT4	ASD ID/DD SCZ	7	nonsynonymous SNV,synonymous SNV	4q28.1	FAT atypical cadherin 4	protein-coding	0	1	0	0	1	0	1	0	0	0	0	0	0	0	0	0	0	1	1	0	1	0	1
84700	MYO18B	ASD ID/DD SCZ	5	nonsynonymous SNV,synonymous SNV	22q12.1	myosin XVIIIB	protein-coding	0	1	0	0	0	0	0	0	0	0	0	0	0	0	0	0	0	0	0	0	0	0	0
51366	UBR5	ASD ID/DD SCZ	6	nonsynonymous SNV,frameshift insertion,synonymous SNV	8q22.3	ubiquitin protein ligase E3 component n-recognin 5	protein-coding	0	1	0	0	0	0	1	0	0	0	0	0	0	0	0	0	0	1	0	0	1	0	1
1306	COL15A1	ASD ID/DD SCZ	3	nonsynonymous SNV,synonymous SNV	9q22.33	collagen type XV alpha 1 chain	protein-coding	0	0	0	0	0	0	0	0	0	0	0	0	0	0	0	0	0	0	0	0	0	0	0
9620	CELSR1	ASD ID/DD SCZ	7	synonymous SNV,nonsynonymous SNV	22q13.31	cadherin EGF LAG seven-pass G-type receptor 1	protein-coding	0	1	0	0	1	0	0	0	0	0	0	0	1	0	0	0	0	1	0	0	1	0	1
9745	ZNF536	ASD ID/DD SCZ	4	nonsynonymous SNV,synonymous SNV	19q12	zinc finger protein 536	protein-coding	0	0	1	0	0	0	1	0	0	0	0	0	0	0	0	0	0	0	0	0	0	0	1
26038	CHD5	ASD ID/DD SCZ	7	nonsynonymous SNV,splice-site mutation,synonymous SNV	1p36.31	chromodomain helicase DNA binding protein 5	protein-coding	0	0	0	0	0	0	1	0	0	0	0	0	0	0	0	0	1	0	0	0	1	0	1
154661	RUNDC3B	ASD ID/DD SCZ	4	nonsynonymous SNV,stopgain	7q21.12	RUN domain containing 3B	protein-coding	0	0	0	0	0	0	0	0	0	0	0	0	0	0	0	0	0	0	0	0	0	0	0
26960	NBEA	ASD ID/DD SCZ	5	nonsynonymous SNV,stopgain,frameshift deletion	13q13.3	neurobeachin	protein-coding	0	1	0	0	0	0	1	0	1	0	0	0	1	1	0	0	0	1	0	0	1	0	1
478	ATP1A3	ASD ID/DD SCZ	5	nonsynonymous SNV	19q13.2	ATPase Na+/K+ transporting subunit alpha 3	protein-coding	0	1	0	0	0	0	1	0	1	1	0	0	1	0	0	0	0	0	0	0	0	0	1
779	CACNA1S	ASD ID/DD SCZ	6	nonsynonymous SNV,frameshift insertion,stopgain	1q32.1	calcium voltage-gated channel subunit alpha1 S	protein-coding	0	1	0	0	0	0	0	1	0	0	0	0	1	0	0	0	0	0	0	0	0	0	0
9915	ARNT2	ASD ID/DD SCZ	3	synonymous SNV,nonsynonymous SNV	15q25.1	aryl hydrocarbon receptor nuclear translocator 2	protein-coding	0	1	1	0	0	0	1	0	0	0	0	0	0	0	0	0	0	0	0	0	0	0	1
3910	LAMA4	ASD ID/DD SCZ	5	nonsynonymous SNV,synonymous SNV	6q21	laminin subunit alpha 4	protein-coding	0	1	0	0	1	0	0	0	0	0	0	0	1	0	0	0	0	0	0	0	0	0	0
129446	XIRP2	ASD ID/DD SCZ	4	nonsynonymous SNV,synonymous SNV	2q24.3	xin actin binding repeat containing 2	protein-coding	0	1	0	0	0	0	0	0	0	0	0	0	1	0	0	0	0	0	0	0	0	0	0
55870	ASH1L	ASD ID/DD SCZ	7	nonsynonymous SNV,frameshift deletion,stopgain,frameshift insertion	1q22	ASH1 like histone lysine methyltransferase	protein-coding	0	0	0	0	0	0	1	0	0	0	0	0	0	0	0	0	1	0	0	0	1	1	1
4038	LRP4	ASD ID/DD SCZ	6	nonsynonymous SNV,synonymous SNV	11p11.2	LDL receptor related protein 4	protein-coding	0	1	0	0	0	0	0	0	0	0	0	0	1	0	0	0	0	0	0	0	0	0	0
170691	ADAMTS17	ASD ID/DD SCZ	7	nonsynonymous SNV,synonymous SNV,nonframeshift deletion	15q26.3	ADAM metallopeptidase with thrombospondin type 1 motif 17	protein-coding	0	0	0	0	0	0	0	0	0	0	0	0	0	0	0	0	0	0	0	0	0	0	0
7175	TPR	ASD ID/DD SCZ	3	nonsynonymous SNV,synonymous SNV	1q31.1	translocated promoter region, nuclear basket protein	protein-coding	0	0	0	0	0	0	0	0	0	0	0	0	0	0	0	0	0	1	0	0	1	0	1
284525	SLC9C2	ASD ID/DD SCZ	4	synonymous SNV,nonsynonymous SNV	1q25.1	solute carrier family 9 member C2 (putative)	protein-coding	0	0	0	0	0	0	0	0	0	0	0	0	0	0	0	0	0	0	0	0	0	0	0
155185	AMZ1	ASD ID/DD SCZ	4	nonsynonymous SNV,synonymous SNV	7p22.3	archaelysin family metallopeptidase 1	protein-coding	0	0	0	0	0	0	0	0	0	0	0	0	0	0	0	0	0	0	0	0	0	0	0
56154	TEX15	ASD ID/DD SCZ	4	nonsynonymous SNV	8p12	testis expressed 15, meiosis and synapsis associated	protein-coding	0	0	0	0	0	0	0	0	0	0	0	0	0	0	0	0	0	0	0	0	0	0	0
2033	EP300	ASD ID/DD SCZ	25	nonsynonymous SNV,splice-site mutation,synonymous SNV,frameshift deletion,frameshift insertion,stopgain,nonframeshift substitution	22q13.2	E1A binding protein p300	protein-coding	0	1	0	0	0	0	1	0	0	0	0	0	0	0	0	0	1	1	1	1	1	0	1
8085	KMT2D	ASD ID/DD SCZ	10	stopgain,nonsynonymous SNV,nonframeshift deletion,synonymous SNV	12q13.12	lysine methyltransferase 2D	protein-coding	0	0	0	0	0	0	1	0	0	0	0	0	0	0	0	0	0	0	1	0	1	0	1
10531	PITRM1	ASD ID/DD SCZ	3	nonsynonymous SNV,synonymous SNV	10p15.2	pitrilysin metallopeptidase 1	protein-coding	1	0	0	0	0	0	0	0	0	0	0	0	0	0	0	0	0	0	0	0	0	0	0
64324	NSD1	ASD ID/DD SCZ	13	nonsynonymous SNV,frameshift deletion,splice-site mutation,stopgain,synonymous SNV	5q35.3	nuclear receptor binding SET domain protein 1	protein-coding	1	1	0	0	0	0	1	0	0	0	0	0	0	0	0	0	1	1	1	0	1	0	1
170692	ADAMTS18	ASD ID/DD SCZ	3	nonsynonymous SNV,synonymous SNV	16q23.1	ADAM metallopeptidase with thrombospondin type 1 motif 18	protein-coding	0	0	0	0	0	0	0	0	0	0	0	0	0	0	0	0	0	0	0	0	0	0	0
131544	CRYBG3	ASD ID/DD SCZ	5	frameshift deletion,nonsynonymous SNV,splice-site mutation,nonframeshift deletion	3q11.2	crystallin beta-gamma domain containing 3	protein-coding	0	0	0	0	0	0	0	0	0	0	0	0	0	0	0	0	0	0	0	0	0	0	0
23303	KIF13B	ASD ID/DD SCZ	7	nonsynonymous SNV,synonymous SNV	8p12	kinesin family member 13B	protein-coding	0	0	0	0	0	0	0	0	0	0	0	0	0	0	0	0	0	0	0	0	0	0	0
7874	USP7	ASD ID/DD SCZ	7	synonymous SNV,nonsynonymous SNV,nonframeshift deletion,frameshift insertion	16p13.2	ubiquitin specific peptidase 7	protein-coding	1	1	0	0	0	0	0	0	0	0	0	0	0	0	0	0	0	0	0	0	1	0	1
196528	ARID2	ASD ID/DD SCZ	5	nonsynonymous SNV,frameshift insertion,stopgain	12q12	AT-rich interaction domain 2	protein-coding	0	0	0	0	0	0	1	0	0	0	0	0	0	0	0	0	1	0	1	0	1	0	1
199953	TMEM201	ASD ID/DD SCZ	3	frameshift deletion,nonsynonymous SNV	1p36.22	transmembrane protein 201	protein-coding	0	0	0	0	0	0	0	0	0	0	0	0	0	0	0	0	0	0	0	0	0	0	0
23345	SYNE1	ASD ID/DD SCZ	12	nonsynonymous SNV,synonymous SNV	6q25.2	spectrin repeat containing nuclear envelope protein 1	protein-coding	0	1	0	0	0	0	1	1	1	0	0	0	1	0	0	0	0	0	1	1	0	0	0
25831	HECTD1	ASD ID/DD SCZ	8	nonsynonymous SNV,nonframeshift deletion,frameshift insertion,stopgain,synonymous SNV	14q12	HECT domain E3 ubiquitin protein ligase 1	protein-coding	0	1	0	0	0	0	0	0	0	0	0	0	0	0	0	0	0	0	0	0	1	0	1
58492	ZNF77	ASD ID/DD SCZ	3	nonsynonymous SNV	19p13.3	zinc finger protein 77	protein-coding	0	0	1	0	0	0	0	0	0	0	0	0	0	0	0	0	0	0	0	0	0	0	0
54617	INO80	ASD ID/DD SCZ	4	nonsynonymous SNV,synonymous SNV	15q15.1	INO80 complex subunit	protein-coding	0	0	0	0	0	0	0	0	0	0	0	0	0	0	0	0	1	0	0	0	0	0	1
7007	TECTA	ASD ID/DD SCZ	7	synonymous SNV,nonsynonymous SNV,frameshift insertion	11q23.3	tectorin alpha	protein-coding	0	0	0	0	0	0	0	0	0	0	0	0	1	0	1	0	0	0	0	0	0	0	0
84629	TNRC18	ASD ID/DD SCZ	4	stopgain,synonymous SNV,nonsynonymous SNV	7p22.1	trinucleotide repeat containing 18	protein-coding	0	0	0	0	0	0	1	0	0	0	0	0	0	0	0	0	0	0	0	0	1	0	1
1463	NCAN	ASD ID/DD SCZ	4	nonsynonymous SNV,nonframeshift deletion	19p13.11	neurocan	protein-coding	0	0	0	0	1	0	1	0	1	0	0	0	0	1	0	0	0	0	0	0	0	0	0
1462	VCAN	ASD ID/DD SCZ	4	synonymous SNV,nonsynonymous SNV	5q14.2-q14.3	versican	protein-coding	0	1	0	0	1	0	0	0	1	0	0	0	0	0	0	0	0	1	0	0	0	0	1
25	ABL1	ASD ID/DD SCZ	4	synonymous SNV,nonsynonymous SNV,nonframeshift deletion,stopgain	9q34.12	ABL proto-oncogene 1, non-receptor tyrosine kinase	protein-coding	0	1	0	0	0	1	0	0	0	0	0	0	0	0	0	0	0	1	0	0	1	0	1
171023	ASXL1	ASD ID/DD SCZ	8	nonsynonymous SNV,frameshift deletion,stopgain,synonymous SNV	20q11.21	additional sex combs like 1, transcriptional regulator	protein-coding	1	0	0	0	0	0	0	0	0	0	0	0	0	0	0	0	1	1	1	0	0	0	0
84162	KIAA1109	ASD ID/DD SCZ	5	nonsynonymous SNV,stopgain	4q27	KIAA1109	protein-coding	0	0	0	0	0	0	1	1	0	0	0	0	0	0	0	0	0	0	0	0	0	0	0
8658	TNKS	ASD ID/DD SCZ	5	nonsynonymous SNV,synonymous SNV,splice-site mutation	8p23.1	tankyrase	protein-coding	0	0	0	0	0	0	1	0	0	0	0	0	1	0	0	0	0	1	0	0	0	0	0
26103	LRIT1	ASD ID/DD SCZ	3	synonymous SNV,nonframeshift deletion,frameshift deletion	10q23.1	leucine rich repeat, Ig-like and transmembrane domains 1	protein-coding	0	0	0	0	0	0	0	0	0	0	0	0	0	0	0	0	0	0	0	0	0	0	0
8943	AP3D1	ASD ID/DD SCZ	4	nonsynonymous SNV	19p13.3	adaptor related protein complex 3 delta 1 subunit	protein-coding	1	1	0	0	0	0	1	0	1	0	0	0	1	0	1	0	0	0	0	0	0	0	0
491	ATP2B2	ASD ID/DD SCZ	4	synonymous SNV,nonsynonymous SNV	3p25.3	ATPase plasma membrane Ca2+ transporting 2	protein-coding	0	0	0	0	0	0	1	1	0	0	0	0	1	0	1	1	0	0	0	0	0	0	1
55075	UACA	ASD ID/DD SCZ	4	nonsynonymous SNV,frameshift deletion	15q23	uveal autoantigen with coiled-coil domains and ankyrin repeats	protein-coding	0	0	0	0	0	0	0	0	0	0	0	0	0	0	0	0	0	0	0	0	0	0	0
3708	ITPR1	ASD ID/DD SCZ	15	nonsynonymous SNV,nonframeshift deletion,synonymous SNV	3p26.1	inositol 1,4,5-trisphosphate receptor type 1	protein-coding	0	1	0	0	0	0	1	1	1	0	0	0	1	0	0	0	0	0	1	0	0	1	1
23132	RAD54L2	ASD ID/DD SCZ	4	nonsynonymous SNV	3p21.2	RAD54 like 2	protein-coding	0	1	0	0	0	0	0	0	0	0	0	0	0	0	0	0	1	1	0	0	0	0	1
9378	NRXN1	ASD ID/DD SCZ	6	nonsynonymous SNV,stopgain	2p16.3	neurexin 1	protein-coding	0	0	0	0	1	0	1	1	1	0	0	0	1	0	0	1	0	0	1	0	1	1	1
23331	TTC28	ASD ID/DD SCZ	4	stopgain,synonymous SNV,nonsynonymous SNV	22q12.1	tetratricopeptide repeat domain 28	protein-coding	0	0	0	0	0	0	0	0	0	0	0	0	0	0	0	0	0	1	0	0	0	0	0
727897	MUC5B	ASD ID/DD SCZ	16	nonsynonymous SNV,nonframeshift deletion,stopgain,synonymous SNV	11p15.5	mucin 5B, oligomeric mucus/gel-forming	protein-coding	0	0	0	0	0	0	0	0	0	0	0	0	0	0	0	0	0	0	0	0	0	0	1
197320	ZNF778	ASD ID/DD SCZ	3	synonymous SNV,nonsynonymous SNV	16q24.3	zinc finger protein 778	protein-coding	0	0	0	0	0	0	0	0	0	0	0	0	0	0	0	0	0	0	0	0	0	0	0
23294	ANKS1A	ASD ID/DD SCZ	3	synonymous SNV,nonsynonymous SNV	6p21.31	ankyrin repeat and sterile alpha motif domain containing 1A	protein-coding	0	0	0	0	0	0	0	0	0	0	0	0	0	0	0	0	0	0	0	0	0	0	0
338440	ANO9	ASD ID/DD SCZ	3	nonsynonymous SNV,frameshift insertion	11p15.5	anoctamin 9	protein-coding	0	0	0	0	0	0	0	0	0	0	0	0	0	0	0	0	0	0	0	0	0	0	0
85301	COL27A1	ASD ID/DD SCZ	4	nonsynonymous SNV,synonymous SNV	9q32	collagen type XXVII alpha 1 chain	protein-coding	0	0	0	0	0	0	0	0	0	0	0	0	0	0	0	0	0	0	0	0	0	0	1
83481	EPPK1	ASD ID/DD SCZ	6	nonsynonymous SNV,synonymous SNV	8q24.3	epiplakin 1	protein-coding	0	0	0	0	0	0	0	0	0	0	0	0	0	0	0	0	0	0	0	0	0	0	0
57523	NYNRIN	ASD ID/DD SCZ	4	nonsynonymous SNV	14q12	NYN domain and retroviral integrase containing	protein-coding	0	0	0	0	0	0	0	0	0	0	0	0	0	0	0	0	0	1	0	0	0	0	0
259232	NALCN	ASD ID/DD SCZ	8	nonsynonymous SNV,synonymous SNV,splice-site mutation	13q32.3-q33.1	sodium leak channel, non-selective	protein-coding	0	1	0	0	0	0	0	0	0	0	0	0	0	0	1	0	0	0	1	0	0	0	0
7840	ALMS1	ASD ID/DD SCZ	5	stopgain,nonsynonymous SNV,nonframeshift deletion,nonframeshift insertion	2p13.1	ALMS1, centrosome and basal body associated protein	protein-coding	0	0	0	0	0	1	0	0	0	0	0	0	1	0	0	0	0	1	1	0	0	0	0
51168	MYO15A	ASD ID/DD SCZ	4	synonymous SNV,nonsynonymous SNV	17p11.2	myosin XVA	protein-coding	0	0	0	0	0	0	0	0	0	0	0	0	1	0	0	0	0	0	0	0	0	0	0
55174	INTS10	ASD ID/DD SCZ	3	nonsynonymous SNV	8p21.3	integrator complex subunit 10	protein-coding	1	0	0	0	0	0	0	0	0	0	0	0	0	0	0	0	0	0	0	0	0	0	1
8853	ASAP2	ASD ID/DD SCZ	4	nonsynonymous SNV,splice-site mutation	2p25.1|2p24	ArfGAP with SH3 domain, ankyrin repeat and PH domain 2	protein-coding	0	0	0	0	0	0	0	0	0	0	0	0	0	0	0	0	0	0	0	0	0	0	1
6263	RYR3	ASD ID/DD SCZ	5	nonsynonymous SNV,synonymous SNV	15q13.3-q14	ryanodine receptor 3	protein-coding	0	0	0	0	0	0	0	0	0	0	0	0	1	1	0	0	0	0	1	0	0	0	1
26115	TANC2	ASD ID/DD SCZ	5	nonsynonymous SNV,stopgain,synonymous SNV	17q23.2-q23.3	tetratricopeptide repeat, ankyrin repeat and coiled-coil containing 2	protein-coding	0	1	0	0	0	0	1	1	1	0	0	0	0	0	0	0	0	0	0	0	1	1	1
3996	LLGL1	ASD ID/DD SCZ	3	nonsynonymous SNV	17p11.2	LLGL1, scribble cell polarity complex component	protein-coding	0	1	0	0	0	0	1	0	1	1	1	0	0	0	0	0	0	0	1	0	1	1	1
51533	PHF7	ASD ID/DD SCZ	4	nonsynonymous SNV,stopgain,frameshift deletion	3p21.1	PHD finger protein 7	protein-coding	0	0	0	0	0	0	0	0	0	0	0	0	0	0	0	0	1	0	0	0	0	0	0
155038	GIMAP8	ASD ID/DD SCZ	4	synonymous SNV,frameshift deletion,nonsynonymous SNV	7q36.1	GTPase, IMAP family member 8	protein-coding	0	0	0	0	0	0	0	0	0	0	0	0	0	0	0	0	0	0	0	0	0	0	0
2335	FN1	ASD ID/DD SCZ	7	nonsynonymous SNV,frameshift deletion,nonframeshift deletion	2q35	fibronectin 1	protein-coding	0	1	0	0	1	0	0	1	0	0	0	0	0	0	0	0	0	0	0	0	0	0	0
158471	PRUNE2	ASD ID/DD SCZ	5	nonsynonymous SNV,synonymous SNV	9q21.2	prune homolog 2	protein-coding	0	0	0	0	0	0	0	1	1	0	0	0	0	0	0	0	0	0	0	0	0	0	0
2778	GNAS	ASD ID/DD SCZ	6	synonymous SNV,nonsynonymous SNV	20q13.32	GNAS complex locus	protein-coding	0	1	0	0	0	0	1	0	1	0	1	0	1	0	0	0	0	0	1	0	0	0	1
547	KIF1A	ASD ID/DD SCZ	12	nonsynonymous SNV	2q37.3	kinesin family member 1A	protein-coding	0	1	0	0	0	0	1	1	0	0	0	0	1	0	0	0	0	0	1	0	0	0	1
4926	NUMA1	ASD ID/DD SCZ	5	nonsynonymous SNV	11q13.4	nuclear mitotic apparatus protein 1	protein-coding	0	1	0	0	0	0	0	1	0	0	0	0	0	0	0	0	0	0	0	0	0	0	1
59269	HIVEP3	ASD ID/DD SCZ	6	stopgain,synonymous SNV,frameshift insertion,frameshift deletion,nonsynonymous SNV	1p34.2	human immunodeficiency virus type I enhancer binding protein 3	protein-coding	0	0	1	0	0	0	1	0	0	0	0	0	0	0	0	0	0	0	0	0	0	1	0
10274	STAG1	ASD ID/DD SCZ	4	nonsynonymous SNV,nonframeshift insertion	3q22.3	stromal antigen 1	protein-coding	0	0	0	0	0	0	0	0	0	0	0	0	0	0	0	0	0	1	0	0	0	0	1
23623	RUSC1	ASD ID/DD SCZ	4	nonsynonymous SNV	1q22	RUN and SH3 domain containing 1	protein-coding	0	0	0	0	0	0	1	0	0	0	0	0	0	0	0	0	0	1	0	0	0	0	1
10840	ALDH1L1	ASD ID/DD SCZ	3	synonymous SNV,nonsynonymous SNV	3q21.3	aldehyde dehydrogenase 1 family member L1	protein-coding	0	0	0	0	0	0	0	0	1	0	0	0	0	0	0	0	0	0	0	0	0	0	0
154664	ABCA13	ASD ID/DD SCZ	13	synonymous SNV,nonsynonymous SNV,stopgain	7p12.3	ATP binding cassette subfamily A member 13	protein-coding	0	0	0	0	0	0	0	0	0	0	0	0	0	0	0	0	0	0	0	0	0	0	0
29123	ANKRD11	ASD ID/DD SCZ	42	synonymous SNV,frameshift deletion,frameshift insertion,nonframeshift deletion,nonsynonymous SNV,stopgain	16q24.3	ankyrin repeat domain 11	protein-coding	0	1	0	0	0	0	1	0	0	0	0	0	1	0	0	0	0	0	1	1	1	1	1
1952	CELSR2	ASD ID/DD SCZ	5	nonsynonymous SNV,synonymous SNV	1p13.3	cadherin EGF LAG seven-pass G-type receptor 2	protein-coding	0	0	0	0	1	0	1	0	0	0	0	0	0	0	0	0	0	0	0	0	0	0	1
3908	LAMA2	ASD ID/DD SCZ	4	nonsynonymous SNV,nonframeshift deletion,synonymous SNV	6q22.33	laminin subunit alpha 2	protein-coding	0	1	0	0	1	0	0	1	0	0	0	0	1	1	1	0	0	0	1	0	0	0	0
23266	ADGRL2	ASD ID/DD SCZ	5	nonsynonymous SNV,stopgain,synonymous SNV	1p31.1	adhesion G protein-coupled receptor L2	protein-coding	0	0	0	0	0	0	0	1	0	0	0	0	1	0	0	0	0	0	0	0	0	0	1
57492	ARID1B	ASD ID/DD SCZ	47	nonsynonymous SNV,frameshift deletion,frameshift insertion,stopgain,splice-site mutation,nonframeshift deletion	6q25.3	AT-rich interaction domain 1B	protein-coding	0	0	0	0	0	0	1	0	0	0	0	0	0	0	0	0	1	0	1	1	1	1	1
1793	DOCK1	ASD ID/DD SCZ	4	synonymous SNV,nonsynonymous SNV	10q26.2	dedicator of cytokinesis 1	protein-coding	0	1	0	0	0	0	0	0	0	0	0	0	0	0	0	0	0	0	0	0	0	0	0
63027	SLC22A23	ASD ID/DD SCZ	6	nonsynonymous SNV,nonframeshift deletion	6p25.2	solute carrier family 22 member 23	protein-coding	0	0	0	0	0	0	0	1	0	0	0	0	0	0	0	0	0	0	0	0	0	0	0
9923	ZBTB40	ASD ID/DD SCZ	3	nonsynonymous SNV,synonymous SNV	1p36.12	zinc finger and BTB domain containing 40	protein-coding	0	0	1	0	0	0	0	0	0	0	0	0	0	0	0	0	0	1	1	0	0	0	0
5591	PRKDC	ASD ID/DD SCZ	5	unknown	8q11.21	protein kinase, DNA-activated, catalytic polypeptide	protein-coding	0	1	0	0	0	0	0	0	0	0	0	0	0	0	0	0	0	1	0	0	0	0	1
84441	MAML2	ASD ID/DD SCZ	3	nonsynonymous SNV,synonymous SNV,nonframeshift insertion	11q21	mastermind like transcriptional coactivator 2	protein-coding	0	0	0	0	0	0	0	0	0	0	0	0	0	0	0	0	0	0	0	0	0	0	1
64101	LRRC4	ASD ID/DD SCZ	3	nonsynonymous SNV,frameshift deletion	7q32.1	leucine rich repeat containing 4	protein-coding	0	0	0	0	0	0	0	0	0	0	0	0	1	0	0	0	0	0	0	0	1	0	0
6651	SON	ASD ID/DD SCZ	7	nonsynonymous SNV,frameshift deletion,frameshift insertion	21q22.11	SON DNA binding protein	protein-coding	1	0	0	0	0	0	1	0	0	0	0	0	0	0	0	0	0	0	1	0	1	0	1
8295	TRRAP	ASD ID/DD SCZ	12	nonsynonymous SNV,synonymous SNV	7q22.1	transformation/transcription domain associated protein	protein-coding	0	1	0	0	0	0	1	0	0	0	0	0	0	0	0	0	1	1	0	0	1	0	1
115	ADCY9	ASD ID/DD SCZ	4	nonsynonymous SNV,frameshift deletion	16p13.3	adenylate cyclase 9	protein-coding	0	0	0	0	0	0	0	0	0	0	0	0	0	0	0	0	0	0	0	0	0	0	1
26509	MYOF	ASD ID/DD SCZ	4	nonsynonymous SNV,synonymous SNV	10q23.33	myoferlin	protein-coding	0	0	0	0	0	0	0	0	0	0	0	0	0	0	0	0	0	0	0	0	0	0	0
5649	RELN	ASD ID/DD SCZ	5	nonsynonymous SNV,stopgain	7q22.1	reelin	protein-coding	0	1	0	0	1	0	1	0	0	0	0	0	1	0	0	0	0	0	1	0	0	1	1
339451	KLHL17	ASD ID/DD SCZ	4	frameshift deletion,nonsynonymous SNV,synonymous SNV	1p36.33	kelch like family member 17	protein-coding	0	0	0	0	0	0	0	0	0	0	0	0	0	0	0	0	0	0	0	0	0	0	0
5792	PTPRF	ASD ID/DD SCZ	6	nonsynonymous SNV,synonymous SNV	1p34.2	protein tyrosine phosphatase, receptor type F	protein-coding	0	0	0	0	1	0	1	0	1	0	0	0	1	0	0	0	0	0	1	0	0	0	1
9060	PAPSS2	ASD ID/DD SCZ	3	synonymous SNV,nonsynonymous SNV	10q23.2-q23.31	3'-phosphoadenosine 5'-phosphosulfate synthase 2	protein-coding	0	0	0	0	0	0	0	0	0	0	0	0	0	0	0	0	0	0	1	0	0	0	0
25981	DNAH1	ASD ID/DD SCZ	7	nonsynonymous SNV,synonymous SNV	3p21.1	dynein axonemal heavy chain 1	protein-coding	0	0	0	0	0	0	0	0	0	0	0	0	0	0	0	0	0	0	0	0	0	0	0
27245	AHDC1	ASD ID/DD SCZ	16	synonymous SNV,nonsynonymous SNV,frameshift insertion,frameshift deletion,stopgain	1p36.11-p35.3	AT-hook DNA binding motif containing 1	protein-coding	0	0	0	0	0	0	1	0	0	0	0	0	0	0	0	0	0	0	1	1	1	0	1
128876	FAM83C	ASD ID/DD SCZ	3	nonsynonymous SNV	20q11.22	family with sequence similarity 83 member C	protein-coding	0	0	0	0	0	0	0	0	0	0	0	0	0	0	0	0	0	0	0	0	0	0	0
26147	PHF19	ASD ID/DD SCZ	3	nonsynonymous SNV,nonframeshift deletion	9q33.2	PHD finger protein 19	protein-coding	0	0	0	0	0	0	0	0	0	0	0	0	0	0	0	0	1	0	0	0	0	0	1
55536	CDCA7L	ASD ID/DD SCZ	3	nonsynonymous SNV	7p15.3	cell division cycle associated 7 like	protein-coding	0	0	0	0	0	0	0	0	0	0	0	0	0	0	0	0	0	0	0	0	0	0	0
57182	ANKRD50	ASD ID/DD SCZ	3	nonsynonymous SNV	4q28.1	ankyrin repeat domain 50	protein-coding	0	0	0	0	0	0	0	0	0	0	0	0	0	0	0	0	0	1	0	0	0	0	1
3619	INCENP	ASD ID/DD SCZ	3	synonymous SNV,nonsynonymous SNV	11q12.3	inner centromere protein	protein-coding	0	1	0	0	0	0	0	0	0	0	0	0	0	0	0	0	0	0	0	0	0	0	1
3959	LGALS3BP	ASD ID/DD SCZ	4	synonymous SNV,nonsynonymous SNV	17q25.3	galectin 3 binding protein	protein-coding	0	0	0	0	0	0	0	0	0	0	0	0	0	0	0	0	0	0	0	0	0	0	0
4851	NOTCH1	ASD ID/DD SCZ	7	synonymous SNV,nonsynonymous SNV,stopgain	9q34.3	notch 1	protein-coding	0	1	0	0	1	0	0	0	0	0	0	0	0	0	0	0	0	0	1	0	1	0	1
22982	DIP2C	ASD ID/DD SCZ	4	synonymous SNV,frameshift insertion,nonsynonymous SNV	10p15.3	disco interacting protein 2 homolog C	protein-coding	0	0	0	0	0	0	1	0	0	0	0	0	0	0	0	0	0	1	0	0	0	0	1
56252	YLPM1	ASD ID/DD SCZ	3	synonymous SNV,nonsynonymous SNV	14q24.3	YLP motif containing 1	protein-coding	0	0	0	0	0	0	0	0	0	0	0	0	0	0	0	0	0	1	0	0	0	0	1
9361	LONP1	ASD ID/DD SCZ	5	synonymous SNV,nonsynonymous SNV	19p13.3	lon peptidase 1, mitochondrial	protein-coding	1	0	0	0	0	0	0	0	0	0	0	0	0	0	0	0	0	0	0	0	1	0	1
8911	CACNA1I	ASD ID/DD SCZ	7	nonsynonymous SNV,synonymous SNV	22q13.1	calcium voltage-gated channel subunit alpha1 I	protein-coding	0	0	0	0	0	0	1	0	0	0	0	0	0	0	0	0	0	0	0	0	1	0	1
23152	CIC	ASD ID/DD SCZ	5	nonsynonymous SNV,stopgain,synonymous SNV	19q13.2	capicua transcriptional repressor	protein-coding	1	0	1	0	0	0	1	0	0	0	0	0	0	0	0	0	0	0	0	1	1	0	1
5116	PCNT	ASD ID/DD SCZ	5	nonsynonymous SNV,synonymous SNV,nonframeshift deletion	21q22.3	pericentrin	protein-coding	0	0	0	0	0	0	0	0	0	0	0	0	0	0	0	0	0	0	1	0	0	0	0
1951	CELSR3	ASD ID/DD SCZ	3	nonsynonymous SNV,synonymous SNV	3p21.31	cadherin EGF LAG seven-pass G-type receptor 3	protein-coding	0	1	0	0	1	0	1	0	0	0	0	0	1	0	0	0	0	1	0	0	0	0	1
6586	SLIT3	ASD ID/DD SCZ	4	nonsynonymous SNV,synonymous SNV	5q34-q35.1	slit guidance ligand 3	protein-coding	0	0	0	0	0	0	0	0	0	0	0	0	0	0	0	0	0	0	0	0	0	0	1
84467	FBN3	ASD BD ID/DD	8	synonymous SNV,nonsynonymous SNV	19p13.2	fibrillin 3	protein-coding	0	0	0	0	0	0	0	0	0	0	0	0	0	0	0	0	0	1	0	0	0	0	0
11187	PKP3	ASD BD ID/DD	4	nonsynonymous SNV,nonframeshift insertion	11p15.5	plakophilin 3	protein-coding	0	0	0	0	1	0	0	0	0	0	0	0	0	0	0	0	0	0	0	0	0	0	0
23312	DMXL2	ASD BD ID/DD	5	nonsynonymous SNV,frameshift deletion	15q21.2	Dmx like 2	protein-coding	0	0	0	0	0	0	1	0	1	0	0	0	0	0	0	1	0	0	0	0	0	0	1
23195	MDN1	ASD BD ID/DD	10	nonsynonymous SNV,splice-site mutation,synonymous SNV	6q15	midasin AAA ATPase 1	protein-coding	0	0	0	0	0	0	0	0	0	0	0	0	0	0	0	0	0	0	0	0	0	0	1
64328	XPO4	ASD BD ID/DD	3	stopgain,frameshift deletion	13q12.11	exportin 4	protein-coding	0	0	0	0	0	0	0	0	0	0	0	0	0	0	0	0	0	0	0	0	0	0	1
64072	CDH23	ASD BD ID/DD	5	nonsynonymous SNV,synonymous SNV	10q22.1	cadherin related 23	protein-coding	0	0	0	0	1	0	0	0	0	0	0	0	1	0	1	0	0	0	1	0	0	0	0
79719	AAGAB	ASD BD ID/DD	3	synonymous SNV,nonsynonymous SNV	15q23	alpha and gamma adaptin binding protein	protein-coding	1	0	0	0	0	0	0	0	0	0	0	0	0	0	0	0	0	0	0	0	0	0	0
3914	LAMB3	ASD BD ID/DD	4	nonsynonymous SNV,synonymous SNV	1q32.2	laminin subunit beta 3	protein-coding	0	1	0	0	1	0	0	0	0	0	0	0	0	0	0	0	0	0	0	0	0	0	0
4624	MYH6	ASD BD ID/DD	3	synonymous SNV,nonsynonymous SNV	14q11.2	myosin heavy chain 6	protein-coding	0	1	0	0	0	0	0	0	0	0	0	0	1	0	0	0	0	0	0	0	0	0	0
4651	MYO10	ASD BD ID/DD	3	synonymous SNV,nonsynonymous SNV	5p15.1	myosin X	protein-coding	0	0	0	0	0	0	1	0	0	0	0	0	0	0	0	0	0	0	0	0	0	0	0
220296	HEPACAM	ASD BD ID/DD	3	nonsynonymous SNV	11q24.2	hepatic and glial cell adhesion molecule	protein-coding	0	0	0	0	1	0	0	0	0	0	0	0	0	0	0	0	0	0	0	0	0	0	0
53353	LRP1B	ASD BD ID/DD	9	synonymous SNV,nonsynonymous SNV,frameshift deletion,stopgain	2q22.1-q22.2	LDL receptor related protein 1B	protein-coding	0	1	0	0	0	0	0	0	0	0	0	0	0	0	0	0	0	0	0	0	0	0	1
5187	PER1	ASD BD ID/DD	3	nonsynonymous SNV,synonymous SNV	17p13.1	period circadian regulator 1	protein-coding	0	0	0	0	0	0	1	0	0	0	0	0	1	0	1	0	0	0	0	0	0	0	0
9256	TSPOAP1	BD ID/DD SCZ	4	nonsynonymous SNV,nonframeshift insertion,synonymous SNV	17q22	TSPO associated protein 1	protein-coding	0	0	0	0	0	0	1	0	0	0	0	0	0	0	0	0	0	0	0	0	0	0	0
55205	ZNF532	ASD SCZ	2	nonsynonymous SNV	18q21.32	zinc finger protein 532	protein-coding	0	0	1	0	0	0	0	1	0	0	0	0	0	0	0	0	0	1	0	0	1	0	1
2976	GTF3C2	ASD SCZ	2	nonsynonymous SNV	2p23.3	general transcription factor IIIC subunit 2	protein-coding	1	0	0	0	0	0	1	0	0	0	0	0	0	0	0	0	0	1	0	0	0	0	1
2134	EXTL1	ASD SCZ	2	nonsynonymous SNV	1p36.11	exostosin like glycosyltransferase 1	protein-coding	0	0	0	0	0	0	0	0	0	0	0	0	0	0	0	0	0	0	0	0	0	0	0
5929	RBBP5	ASD SCZ	2	nonsynonymous SNV	1q32.1	RB binding protein 5, histone lysine methyltransferase complex subunit	protein-coding	0	0	0	0	0	0	0	0	0	0	0	0	0	0	0	0	1	0	0	0	0	0	1
1981	EIF4G1	ASD SCZ	2	synonymous SNV,nonsynonymous SNV	3q27.1	eukaryotic translation initiation factor 4 gamma 1	protein-coding	1	0	0	0	0	0	1	1	0	0	0	0	0	0	0	0	0	0	0	0	1	0	1
6568	SLC17A1	ASD SCZ	2	nonsynonymous SNV	6p22.2	solute carrier family 17 member 1	protein-coding	0	0	0	0	0	0	0	0	0	0	0	0	0	0	0	0	0	0	0	0	0	0	0
4343	MOV10	ASD SCZ	2	frameshift insertion,frameshift deletion	1p13.2	Mov10 RISC complex RNA helicase	protein-coding	0	0	0	0	0	0	0	0	0	0	0	0	0	0	0	0	0	0	0	0	0	0	1
5018	OXA1L	ASD SCZ	2	synonymous SNV,nonsynonymous SNV	14q11.2	OXA1L, mitochondrial inner membrane protein	protein-coding	1	0	0	0	0	0	0	0	0	0	0	0	0	0	0	0	0	1	0	0	0	0	0
205717	USF3	ASD SCZ	2	nonsynonymous SNV,stopgain	3q13.2	upstream transcription factor family member 3	protein-coding	0	0	0	0	0	0	1	0	0	0	0	0	0	0	0	0	0	0	0	0	0	0	1
7402	UTRN	ASD SCZ	3	nonsynonymous SNV,synonymous SNV	6q24.2	utrophin	protein-coding	0	0	0	0	0	0	0	0	0	0	0	0	0	0	0	0	0	0	0	0	0	0	0
10681	GNB5	ASD SCZ	2	nonsynonymous SNV	15q21.2	G protein subunit beta 5	protein-coding	0	1	0	0	0	0	0	0	1	0	0	0	0	0	0	0	0	0	1	0	0	0	0
64744	SMAP2	ASD SCZ	2	nonsynonymous SNV,stopgain	1p34.2	small ArfGAP2	protein-coding	0	0	0	0	0	0	0	0	0	0	0	0	0	0	0	0	0	0	0	0	0	0	0
9928	KIF14	ASD SCZ	2	nonsynonymous SNV,synonymous SNV	1q32.1	kinesin family member 14	protein-coding	0	0	0	0	0	0	0	0	0	0	0	0	1	0	0	0	0	1	0	0	0	0	0
9332	CD163	ASD SCZ	2	nonsynonymous SNV	12p13.31	CD163 molecule	protein-coding	0	0	0	0	0	0	0	0	0	0	0	0	0	0	0	0	0	0	0	0	0	0	0
2015	ADGRE1	ASD SCZ	2	nonsynonymous SNV	19p13.3-p13.2	adhesion G protein-coupled receptor E1	protein-coding	0	0	0	0	1	0	0	0	0	0	0	0	0	0	0	0	0	0	0	0	0	0	0
3208	HPCA	ASD SCZ	2	nonsynonymous SNV	1p35.1	hippocalcin	protein-coding	0	0	0	0	0	0	0	0	0	0	0	0	0	0	0	0	0	0	0	0	0	0	0
338657	CCDC84	ASD SCZ	2	nonsynonymous SNV	11q23.3	coiled-coil domain containing 84	protein-coding	0	0	0	0	0	0	0	0	0	0	0	0	0	0	0	0	0	0	0	0	0	0	0
57099	AVEN	ASD SCZ	2	nonsynonymous SNV	15q14	apoptosis and caspase activation inhibitor	protein-coding	0	0	0	0	0	0	0	0	0	0	0	0	0	0	0	0	0	0	0	0	0	0	0
64174	DPEP2	ASD SCZ	2	nonsynonymous SNV,synonymous SNV	16q22.1	dipeptidase 2	protein-coding	0	0	0	0	0	0	0	0	0	0	0	0	0	0	0	0	0	0	0	0	0	0	0
6880	TAF9	ASD SCZ	2	nonsynonymous SNV	5q13.2	TATA-box binding protein associated factor 9	protein-coding	1	0	0	0	0	0	0	0	0	0	0	0	0	0	0	0	1	0	0	0	0	0	0
93100	NAPRT	ASD SCZ	2	synonymous SNV,splice-site mutation	8q24.3	nicotinate phosphoribosyltransferase	protein-coding	0	0	0	0	0	0	0	0	0	0	0	0	0	0	0	0	0	0	0	0	0	0	0
9043	SPAG9	ASD SCZ	3	nonsynonymous SNV,frameshift deletion	17q21.33	sperm associated antigen 9	protein-coding	1	0	0	0	0	0	1	1	0	0	0	0	0	0	0	0	0	0	0	0	0	0	1
8021	NUP214	ASD SCZ	2	frameshift insertion,nonsynonymous SNV	9q34.13	nucleoporin 214	protein-coding	0	1	0	0	0	0	0	0	0	0	0	0	0	0	0	0	0	1	0	0	0	0	1
8662	EIF3B	ASD SCZ	2	splice-site mutation,nonsynonymous SNV	7p22.3	eukaryotic translation initiation factor 3 subunit B	protein-coding	1	0	0	0	0	0	0	0	0	0	0	0	0	0	0	0	0	0	0	0	0	0	1
1740	DLG2	ASD SCZ	2	splice-site mutation,nonsynonymous SNV	11q14.1	discs large MAGUK scaffold protein 2	protein-coding	0	0	0	0	0	0	1	1	0	0	0	0	1	0	0	0	0	0	0	0	0	0	0
4288	MKI67	ASD SCZ	5	stopgain,nonsynonymous SNV,synonymous SNV	10q26.2	marker of proliferation Ki-67	protein-coding	0	0	0	0	0	0	0	0	0	0	0	0	0	0	0	0	0	1	0	0	0	0	0
23215	PRRC2C	ASD SCZ	2	nonsynonymous SNV	1q24.3	proline rich coiled-coil 2C	protein-coding	0	0	0	0	0	0	1	0	0	0	0	0	0	0	0	0	0	0	0	0	0	0	1
2036	EPB41L1	ASD SCZ	2	nonsynonymous SNV	20q11.23	erythrocyte membrane protein band 4.1 like 1	protein-coding	0	0	0	0	0	0	1	1	1	0	0	0	0	0	0	1	0	0	0	0	0	0	0
56136	PCDHA13	ASD SCZ	3	synonymous SNV,frameshift deletion,nonsynonymous SNV	5q31.3	protocadherin alpha 13	protein-coding	0	0	0	0	1	0	0	0	0	0	0	0	0	0	0	0	0	0	0	0	0	0	0
157855	KCNU1	ASD SCZ	2	stopgain,synonymous SNV	8p11.23	potassium calcium-activated channel subfamily U member 1	protein-coding	0	0	0	0	0	0	0	0	0	0	0	0	0	0	0	0	0	0	0	0	0	0	0
23405	DICER1	ASD SCZ	3	nonsynonymous SNV	14q32.13	dicer 1, ribonuclease III	protein-coding	0	1	0	0	0	0	1	0	0	0	0	0	0	0	0	0	0	1	0	0	1	0	1
1379	CR1L	ASD SCZ	2	nonsynonymous SNV	1q32.2	complement C3b/C4b receptor 1 like	protein-coding	0	0	0	0	0	0	0	0	0	0	0	0	0	0	0	0	0	0	0	0	0	0	0
5826	ABCD4	ASD SCZ	2	nonsynonymous SNV,synonymous SNV	14q24.3	ATP binding cassette subfamily D member 4	protein-coding	0	0	0	0	0	0	0	0	0	0	0	0	1	0	0	0	0	0	1	0	0	0	0
57496	MKL2	ASD SCZ	2	nonsynonymous SNV	16p13.12	MKL1/myocardin like 2	protein-coding	0	1	0	0	0	0	1	0	1	0	0	0	0	0	0	0	0	0	0	0	0	0	1
23230	VPS13A	ASD SCZ	2	nonsynonymous SNV	9q21.2	vacuolar protein sorting 13 homolog A	protein-coding	0	0	0	0	0	0	0	0	0	0	0	0	1	0	0	0	0	0	0	0	0	0	0
84446	BRSK1	ASD SCZ	3	nonsynonymous SNV,frameshift deletion	19q13.42	BR serine/threonine kinase 1	protein-coding	0	0	0	0	0	0	1	0	1	0	0	0	0	0	0	1	0	0	0	0	0	0	1
84640	USP38	ASD SCZ	2	synonymous SNV	4q31.21	ubiquitin specific peptidase 38	protein-coding	1	0	0	0	0	0	0	0	0	0	0	0	0	0	0	0	0	0	0	0	0	0	0
5991	RFX3	ASD SCZ	2	nonsynonymous SNV	9p24.2	regulatory factor X3	protein-coding	0	1	1	0	0	0	0	1	0	0	0	0	0	0	0	0	0	1	0	0	0	0	1
113146	AHNAK2	ASD SCZ	7	nonsynonymous SNV,synonymous SNV	14q32.33	AHNAK nucleoprotein 2	protein-coding	0	0	0	0	0	0	0	0	0	0	0	0	0	0	0	0	0	0	0	0	0	0	0
55620	STAP2	ASD SCZ	2	stopgain,synonymous SNV	19p13.3	signal transducing adaptor family member 2	protein-coding	0	0	0	0	0	0	0	0	0	0	0	0	0	0	0	0	0	0	0	0	0	0	0
9368	SLC9A3R1	ASD SCZ	2	nonsynonymous SNV,synonymous SNV	17q25.1	SLC9A3 regulator 1	protein-coding	0	1	0	0	0	0	0	0	0	0	0	0	1	0	0	0	0	0	0	0	0	0	0
5079	PAX5	ASD SCZ	2	nonsynonymous SNV,frameshift deletion	9p13.2	paired box 5	protein-coding	0	1	1	0	0	0	0	0	0	0	0	0	1	0	0	0	0	0	0	0	1	1	1
132949	AASDH	ASD SCZ	2	nonsynonymous SNV,frameshift insertion	4q12	aminoadipate-semialdehyde dehydrogenase	protein-coding	0	0	0	0	0	0	0	0	0	0	0	0	0	0	0	0	0	0	0	0	0	0	0
130074	FAM168B	ASD SCZ	2	synonymous SNV,splice-site mutation	2q21.1	family with sequence similarity 168 member B	protein-coding	1	0	0	0	0	0	0	0	0	0	0	0	0	0	0	0	0	0	0	0	0	0	0
84812	PLCD4	ASD SCZ	3	nonsynonymous SNV,frameshift insertion	2q35	phospholipase C delta 4	protein-coding	0	0	0	0	0	0	0	0	0	0	0	0	0	0	0	0	0	0	0	0	0	0	0
3885	KRT34	ASD SCZ	4	nonsynonymous SNV,synonymous SNV	17q21.2	keratin 34	protein-coding	0	0	0	0	0	0	0	0	0	0	0	0	0	0	0	0	0	0	0	0	0	0	0
2185	PTK2B	ASD SCZ	3	nonsynonymous SNV,synonymous SNV	8p21.2	protein tyrosine kinase 2 beta	protein-coding	0	0	0	0	0	1	1	1	1	0	1	0	0	0	0	0	0	0	0	0	0	0	1
23244	PDS5A	ASD SCZ	2	synonymous SNV,nonsynonymous SNV	4p14	PDS5 cohesin associated factor A	protein-coding	1	1	0	0	0	0	0	0	0	0	0	0	0	0	0	0	0	1	0	0	0	0	1
7915	ALDH5A1	ASD SCZ	3	nonsynonymous SNV	6p22.3	aldehyde dehydrogenase 5 family member A1	protein-coding	0	1	0	0	0	0	0	0	0	0	0	0	1	0	1	0	0	0	1	0	0	0	0
3993	LLGL2	ASD SCZ	3	nonsynonymous SNV,synonymous SNV	17q25.1	LLGL2, scribble cell polarity complex component	protein-coding	0	1	0	0	0	0	0	0	0	0	0	0	0	0	0	0	0	0	0	0	0	0	0
22861	NLRP1	ASD SCZ	3	nonsynonymous SNV	17p13.2	NLR family pyrin domain containing 1	protein-coding	0	0	0	0	0	0	0	0	0	0	0	0	0	0	0	0	0	0	0	0	0	0	0
58525	WIZ	ASD SCZ	2	nonsynonymous SNV,synonymous SNV	19p13.12	widely interspaced zinc finger motifs	protein-coding	1	0	1	0	0	0	0	0	0	0	0	0	0	0	0	0	0	0	0	0	0	0	1
285313	IGSF10	ASD SCZ	2	synonymous SNV,nonsynonymous SNV	3q25.1	immunoglobulin superfamily member 10	protein-coding	0	0	0	0	0	0	0	0	0	0	0	0	0	0	0	0	0	0	0	0	0	0	0
84572	GNPTG	ASD SCZ	2	synonymous SNV,nonsynonymous SNV	16p13.3	N-acetylglucosamine-1-phosphate transferase gamma subunit	protein-coding	1	0	0	0	0	0	0	0	0	0	0	0	0	0	0	0	0	0	1	0	0	0	0
4041	LRP5	ASD SCZ	3	nonsynonymous SNV	11q13.2	LDL receptor related protein 5	protein-coding	0	1	0	0	0	0	0	0	0	0	0	0	1	0	0	0	0	1	1	0	1	0	1
2167	FABP4	ASD SCZ	2	nonsynonymous SNV	8q21.13	fatty acid binding protein 4	protein-coding	0	0	0	0	0	0	0	0	0	0	0	0	0	0	0	0	0	0	0	0	0	0	0
337876	CHSY3	ASD SCZ	2	synonymous SNV	5q23.3	chondroitin sulfate synthase 3	protein-coding	0	0	0	0	0	0	0	0	0	0	0	0	0	0	0	0	0	0	0	0	0	0	0
83696	TRAPPC9	ASD SCZ	3	nonsynonymous SNV	8q24.3	trafficking protein particle complex 9	protein-coding	1	0	0	0	0	0	0	1	0	0	0	0	0	0	0	1	0	0	1	0	0	0	0
163589	TDRD5	ASD SCZ	3	synonymous SNV,nonsynonymous SNV	1q25.2	tudor domain containing 5	protein-coding	0	0	0	0	0	0	0	0	0	0	0	0	0	0	0	0	1	0	0	0	0	0	1
121457	IKBIP	ASD SCZ	2	nonsynonymous SNV	12q23.1	IKBKB interacting protein	protein-coding	0	0	0	0	0	0	0	0	0	0	0	0	0	0	0	0	0	0	0	0	0	0	0
22999	RIMS1	ASD SCZ	3	nonsynonymous SNV,frameshift insertion	6q13	regulating synaptic membrane exocytosis 1	protein-coding	0	1	0	0	0	0	0	0	1	0	0	0	1	1	0	1	0	0	0	0	0	1	0
3631	INPP4A	ASD SCZ	2	synonymous SNV,nonsynonymous SNV	2q11.2	inositol polyphosphate-4-phosphatase type I A	protein-coding	0	1	0	0	0	0	1	0	1	0	0	0	1	0	0	0	0	0	1	0	0	0	1
128553	TSHZ2	ASD SCZ	2	nonsynonymous SNV,synonymous SNV	20q13.2	teashirt zinc finger homeobox 2	protein-coding	0	1	1	0	0	0	0	0	0	0	0	0	0	0	0	0	0	0	0	0	0	0	0
339501	PRSS38	ASD SCZ	2	nonsynonymous SNV,stopgain	1q42.13	protease, serine 38	protein-coding	0	0	0	0	0	0	0	0	0	0	0	0	0	0	0	0	0	0	0	0	0	0	0
50944	SHANK1	ASD SCZ	2	frameshift insertion,nonsynonymous SNV	19q13.33	SH3 and multiple ankyrin repeat domains 1	protein-coding	0	0	0	0	0	1	1	0	1	0	1	0	1	0	0	0	0	0	1	0	0	0	1
3720	JARID2	ASD SCZ	3	nonsynonymous SNV,frameshift deletion,synonymous SNV	6p22.3	jumonji and AT-rich interaction domain containing 2	protein-coding	0	1	0	0	0	0	0	0	0	0	0	0	0	0	0	0	1	0	0	0	0	0	1
100101267	POM121C	ASD SCZ	2	nonsynonymous SNV,synonymous SNV	7q11.23	POM121 transmembrane nucleoporin C	protein-coding	1	0	0	0	0	0	0	0	0	0	0	0	0	0	0	0	0	0	0	0	0	0	0
57700	FAM160B1	ASD SCZ	2	nonsynonymous SNV,splice-site mutation	10q25.3	family with sequence similarity 160 member B1	protein-coding	1	0	0	0	0	0	0	0	0	0	0	0	0	0	0	0	0	0	0	0	0	0	1
9666	DZIP3	ASD SCZ	2	synonymous SNV,nonsynonymous SNV	3q13.13	DAZ interacting zinc finger protein 3	protein-coding	0	0	0	0	0	0	0	0	0	0	0	0	0	0	0	0	1	0	0	0	0	0	0
26512	INTS6	ASD SCZ	3	nonsynonymous SNV,stopgain	13q14.3	integrator complex subunit 6	protein-coding	0	1	0	0	0	0	0	0	0	0	0	0	0	0	0	0	0	0	0	0	1	0	1
10402	ST3GAL6	ASD SCZ	2	stopgain,splice-site mutation	3q12.1	ST3 beta-galactoside alpha-2,3-sialyltransferase 6	protein-coding	0	0	0	0	0	0	0	0	0	0	0	0	0	0	0	0	0	0	0	0	0	0	0
85449	KIAA1755	ASD SCZ	2	synonymous SNV,nonsynonymous SNV	20q11.23	KIAA1755	protein-coding	0	0	0	0	0	0	0	0	0	0	0	0	0	0	0	0	0	0	0	0	0	0	0
84878	ZBTB45	ASD SCZ	3	nonsynonymous SNV,nonframeshift deletion,frameshift deletion	19q13.43	zinc finger and BTB domain containing 45	protein-coding	1	0	1	0	0	0	0	0	0	0	0	0	0	0	0	0	0	0	0	0	0	0	0
23025	UNC13A	ASD SCZ	2	nonsynonymous SNV	19p13.11	unc-13 homolog A	protein-coding	0	1	0	0	0	0	1	0	1	0	0	0	1	0	0	1	0	0	0	1	1	0	1
10002	NR2E3	ASD SCZ	2	frameshift deletion,synonymous SNV	15q23	nuclear receptor subfamily 2 group E member 3	protein-coding	0	0	1	0	0	0	0	0	0	0	0	0	0	0	0	0	0	0	0	0	0	0	0
22990	PCNX1	ASD SCZ	3	synonymous SNV,nonsynonymous SNV	14q24.2	pecanex homolog 1	protein-coding	1	0	0	0	0	0	1	1	0	0	0	0	0	0	0	0	0	0	0	0	0	0	1
23511	NUP188	ASD SCZ	3	synonymous SNV,nonsynonymous SNV	9q34.11	nucleoporin 188	protein-coding	0	0	0	0	0	0	0	0	0	0	0	0	0	0	0	0	0	0	0	0	0	0	1
2694	GIF	ASD SCZ	2	nonsynonymous SNV,synonymous SNV	11q12.1	gastric intrinsic factor	protein-coding	0	0	0	0	0	0	0	0	0	0	0	0	1	0	0	0	0	0	0	0	0	0	0
23145	SSPO	ASD SCZ	4	nonsynonymous SNV,synonymous SNV	7q36.1	SCO-spondin	protein-coding	0	0	0	0	0	0	0	0	0	0	0	0	0	0	0	0	0	0	0	0	0	0	0
6646	SOAT1	ASD SCZ	2	nonsynonymous SNV	1q25.2	sterol O-acyltransferase 1	protein-coding	0	0	0	0	0	0	0	0	1	0	0	0	0	0	0	0	0	0	1	0	0	0	0
9382	COG1	ASD SCZ	2	synonymous SNV,nonsynonymous SNV	17q25.1	component of oligomeric golgi complex 1	protein-coding	1	0	0	0	0	0	0	0	0	0	0	0	0	0	0	0	0	0	1	0	0	0	0
140453	MUC17	ASD SCZ	5	nonsynonymous SNV,synonymous SNV	7q22.1	mucin 17, cell surface associated	protein-coding	0	0	0	0	0	0	0	0	0	0	0	0	0	0	0	0	0	0	0	0	0	0	0
8355	HIST1H3G	ASD SCZ	2	synonymous SNV,nonsynonymous SNV	6p22.2	histone cluster 1 H3 family member g	protein-coding	0	0	0	0	0	0	0	0	0	0	0	0	0	0	0	0	0	0	0	0	0	0	0
23592	LEMD3	ASD SCZ	2	nonsynonymous SNV	12q14.3	LEM domain containing 3	protein-coding	0	1	0	0	0	0	0	0	0	0	0	0	0	0	0	0	0	1	1	0	0	0	1
81930	KIF18A	ASD SCZ	3	nonsynonymous SNV	11p14.1	kinesin family member 18A	protein-coding	0	0	0	0	0	0	0	0	0	0	0	0	0	0	0	0	0	1	0	0	0	0	0
1840	DTX1	ASD SCZ	2	nonsynonymous SNV	12q24.13	deltex E3 ubiquitin ligase 1	protein-coding	0	0	0	0	0	0	1	0	0	0	0	0	0	0	0	0	0	0	0	0	0	0	0
115111	SLC26A7	ASD SCZ	2	synonymous SNV,nonsynonymous SNV	8q21.3	solute carrier family 26 member 7	protein-coding	0	0	0	0	0	0	0	0	0	0	0	0	0	0	0	0	0	0	0	0	0	0	0
23114	NFASC	ASD SCZ	4	nonsynonymous SNV,synonymous SNV	1q32.1	neurofascin	protein-coding	0	1	0	0	1	0	0	1	1	0	0	0	1	0	1	0	0	0	0	0	1	0	1
9829	DNAJC6	ASD SCZ	2	nonsynonymous SNV,synonymous SNV	1p31.3	DnaJ heat shock protein family (Hsp40) member C6	protein-coding	0	1	0	0	0	0	1	0	1	0	0	0	0	0	0	0	0	0	0	0	0	0	1
348327	ZNF530	ASD SCZ	2	nonsynonymous SNV	19q13.43	zinc finger protein 530	protein-coding	0	0	1	0	0	0	0	0	0	0	0	0	0	0	0	0	0	0	0	0	0	0	0
4308	TRPM1	ASD SCZ	2	nonsynonymous SNV	15q13.3	transient receptor potential cation channel subfamily M member 1	protein-coding	0	0	0	0	0	0	0	0	0	0	0	0	0	0	0	0	0	0	1	0	0	0	0
56890	MDM1	ASD SCZ	2	nonsynonymous SNV	12q15	Mdm1 nuclear protein	protein-coding	0	0	0	0	0	0	0	0	0	0	0	0	0	0	0	0	0	0	0	0	0	0	0
23037	PDZD2	ASD SCZ	2	nonsynonymous SNV	5p13.3	PDZ domain containing 2	protein-coding	0	0	0	0	0	0	1	0	0	0	0	0	0	0	0	0	0	0	0	0	0	0	1
147183	KRT25	ASD SCZ	2	nonsynonymous SNV	17q21.2	keratin 25	protein-coding	0	0	0	0	0	0	0	0	0	0	0	0	0	0	0	0	0	0	0	0	0	0	0
3667	IRS1	ASD SCZ	3	nonsynonymous SNV,synonymous SNV	2q36.3	insulin receptor substrate 1	protein-coding	0	1	0	0	0	0	0	0	0	0	0	0	0	0	0	0	0	0	0	0	0	0	0
129607	CMPK2	ASD SCZ	2	nonsynonymous SNV,stopgain	2p25.2	cytidine/uridine monophosphate kinase 2	protein-coding	0	0	0	0	0	0	0	0	0	0	0	0	0	0	0	0	0	0	0	0	0	0	0
594855	CPLX3	ASD SCZ	2	synonymous SNV	15q24.1	complexin 3	protein-coding	0	0	0	0	0	0	0	0	0	0	0	0	0	0	0	0	0	0	0	0	0	0	0
1238	ACKR2	ASD SCZ	2	synonymous SNV,nonsynonymous SNV	3p22.1	atypical chemokine receptor 2	protein-coding	0	0	0	0	0	0	0	0	0	0	0	0	0	0	0	0	0	0	0	0	0	0	0
26090	ABHD12	ASD SCZ	2	nonsynonymous SNV	20p11.21	abhydrolase domain containing 12	protein-coding	1	0	0	0	0	0	0	0	0	0	0	0	1	0	0	0	0	0	0	0	0	0	0
1003	CDH5	ASD SCZ	2	nonsynonymous SNV	16q21	cadherin 5	protein-coding	0	1	0	0	1	0	0	0	0	0	0	0	0	0	0	0	0	0	0	0	0	0	0
23523	CABIN1	ASD SCZ	2	nonsynonymous SNV	22q11.23	calcineurin binding protein 1	protein-coding	0	1	0	0	0	0	1	0	0	0	0	0	0	0	0	0	0	0	0	0	0	0	0
5793	PTPRG	ASD SCZ	3	nonsynonymous SNV,stopgain	3p14.2	protein tyrosine phosphatase, receptor type G	protein-coding	0	0	0	0	1	0	1	0	0	0	0	0	1	0	0	0	0	0	0	0	0	0	0
54497	HEATR5B	ASD SCZ	2	synonymous SNV,stopgain	2p22.2	HEAT repeat containing 5B	protein-coding	0	0	0	0	0	0	1	0	0	0	0	0	0	0	0	0	0	0	0	0	0	0	0
387778	SPDYC	ASD SCZ	2	nonsynonymous SNV,stopgain	11q13.1	speedy/RINGO cell cycle regulator family member C	protein-coding	0	0	0	0	0	0	0	0	0	0	0	0	0	0	0	0	0	0	0	0	0	0	0
54834	GDAP2	ASD SCZ	2	synonymous SNV	1p12	ganglioside induced differentiation associated protein 2	protein-coding	0	0	0	0	0	0	0	0	0	0	0	0	0	0	0	0	0	0	0	0	0	0	0
22856	CHSY1	ASD SCZ	2	nonsynonymous SNV	15q26.3	chondroitin sulfate synthase 1	protein-coding	0	0	0	0	0	0	0	0	0	0	0	0	1	0	0	0	0	0	1	0	0	0	1
9967	THRAP3	ASD SCZ	2	nonsynonymous SNV	1p34.3	thyroid hormone receptor associated protein 3	protein-coding	1	0	0	0	0	0	0	0	0	0	0	0	0	0	0	0	0	1	0	0	0	0	1
9826	ARHGEF11	ASD SCZ	4	nonsynonymous SNV,synonymous SNV	1q23.1	Rho guanine nucleotide exchange factor 11	protein-coding	1	0	0	0	0	0	1	0	0	0	0	0	0	0	0	0	0	0	0	0	0	0	1
55183	RIF1	ASD SCZ	2	nonsynonymous SNV,synonymous SNV	2q23.3	replication timing regulatory factor 1	protein-coding	0	1	0	0	0	0	0	0	0	0	0	0	0	0	0	0	0	1	0	0	0	0	1
54906	FAM208B	ASD SCZ	2	synonymous SNV,nonsynonymous SNV	10p15.1	family with sequence similarity 208 member B	protein-coding	1	0	0	0	0	0	0	0	0	0	0	0	0	0	0	0	0	0	0	0	0	0	1
399979	SNX19	ASD SCZ	2	nonsynonymous SNV	11q24.3-q25	sorting nexin 19	protein-coding	1	0	0	0	0	0	0	0	0	0	0	0	0	0	0	0	0	0	0	0	0	0	0
2035	EPB41	ASD SCZ	2	nonframeshift insertion,synonymous SNV	1p35.3	erythrocyte membrane protein band 4.1	protein-coding	0	0	0	0	0	0	0	1	0	0	0	0	0	0	0	0	0	1	0	0	0	0	0
8940	TOP3B	ASD SCZ	2	nonsynonymous SNV	22q11.22	DNA topoisomerase III beta	protein-coding	0	0	0	0	0	0	0	0	0	0	0	0	0	0	0	0	0	0	0	0	0	0	0
56934	CA10	ASD SCZ	3	nonsynonymous SNV,synonymous SNV	17q21.33-q22	carbonic anhydrase 10	protein-coding	0	0	0	0	0	0	0	0	0	0	0	0	0	0	0	0	0	0	0	0	0	0	1
2049	EPHB3	ASD SCZ	2	synonymous SNV	3q27.1	EPH receptor B3	protein-coding	0	0	0	0	1	0	0	0	0	0	0	0	0	0	0	0	0	0	0	0	0	0	1
166378	SPATA5	ASD SCZ	2	nonframeshift deletion,nonsynonymous SNV	4q28.1	spermatogenesis associated 5	protein-coding	0	0	0	0	0	0	0	0	0	0	0	0	0	0	0	0	0	1	1	0	0	0	0
285513	GPRIN3	ASD SCZ	2	nonsynonymous SNV	4q22.1	GPRIN family member 3	protein-coding	0	0	0	0	0	0	0	0	0	0	0	0	0	0	0	0	0	0	0	0	0	0	0
9947	MAGEC1	ASD SCZ	2	nonsynonymous SNV	Xq27.2	MAGE family member C1	protein-coding	0	0	0	0	0	0	0	0	0	0	0	0	0	0	0	0	0	0	0	0	0	0	0
23339	VPS39	ASD SCZ	2	nonsynonymous SNV	15q15.1	VPS39, HOPS complex subunit	protein-coding	0	0	0	0	0	0	0	0	0	0	0	0	0	0	0	0	0	1	0	0	0	0	0
200845	KCTD6	ASD SCZ	2	nonsynonymous SNV	3p14.3	potassium channel tetramerization domain containing 6	protein-coding	1	0	0	0	0	0	0	0	0	0	0	0	0	0	0	0	0	0	0	0	0	0	0
2729	GCLC	ASD SCZ	2	synonymous SNV,nonsynonymous SNV	6p12.1	glutamate-cysteine ligase catalytic subunit	protein-coding	1	1	0	0	0	0	0	0	0	0	0	0	0	0	0	0	0	0	0	0	0	0	0
6712	SPTBN2	ASD ID/DD	4	nonsynonymous SNV	11q13.2	spectrin beta, non-erythrocytic 2	protein-coding	0	0	0	0	0	0	1	0	0	0	0	0	1	0	1	0	0	0	0	0	0	0	1
81846	SBF2	ASD ID/DD	2	nonsynonymous SNV	11p15.4	SET binding factor 2	protein-coding	0	0	0	0	0	0	0	0	1	0	0	0	1	0	1	0	0	1	0	0	0	0	0
56243	KIAA1217	ASD ID/DD	3	synonymous SNV,nonsynonymous SNV	10p12.2-p12.1	KIAA1217	protein-coding	0	0	0	0	0	0	0	0	1	0	0	0	0	0	0	0	0	0	0	0	0	0	0
1387	CREBBP	ASD ID/DD	17	nonsynonymous SNV,nonframeshift insertion,splice-site mutation,stopgain	16p13.3	CREB binding protein	protein-coding	0	1	0	0	0	0	1	0	0	0	0	0	1	0	0	0	1	1	1	0	1	0	1
9736	USP34	ASD ID/DD	2	nonsynonymous SNV,stopgain	2p15	ubiquitin specific peptidase 34	protein-coding	0	0	0	0	0	0	1	0	0	0	0	0	0	0	0	0	0	1	0	0	0	0	1
284001	CCDC57	ASD ID/DD	2	nonsynonymous SNV,synonymous SNV	17q25.3	coiled-coil domain containing 57	protein-coding	0	0	0	0	0	0	0	0	0	0	0	0	0	0	0	0	0	0	0	0	0	0	0
146330	FBXL16	ASD ID/DD	2	nonsynonymous SNV,synonymous SNV	16p13.3	F-box and leucine rich repeat protein 16	protein-coding	0	0	0	0	0	0	1	0	0	0	0	0	0	0	0	0	0	0	0	0	0	0	1
85445	CNTNAP4	ASD ID/DD	3	nonsynonymous SNV	16q23.1	contactin associated protein like 4	protein-coding	0	0	0	0	1	0	0	0	0	0	0	0	0	0	0	0	0	0	0	0	1	0	0
6531	SLC6A3	ASD ID/DD	3	nonsynonymous SNV,frameshift deletion,synonymous SNV	5p15.33	solute carrier family 6 member 3	protein-coding	0	0	0	0	0	0	0	0	0	0	0	0	1	1	1	0	0	0	1	0	0	0	1
3185	HNRNPF	ASD ID/DD	2	nonsynonymous SNV,synonymous SNV	10q11.21	heterogeneous nuclear ribonucleoprotein F	protein-coding	1	0	0	1	0	0	0	0	0	0	0	0	0	0	0	0	0	1	0	0	0	0	0
11169	WDHD1	ASD ID/DD	3	nonsynonymous SNV	14q22.2-q22.3	WD repeat and HMG-box DNA binding protein 1	protein-coding	0	0	0	0	0	0	0	0	0	0	0	0	0	0	0	0	0	1	0	0	0	0	0
11083	DIDO1	ASD ID/DD	6	nonsynonymous SNV,synonymous SNV	20q13.33	death inducer-obliterator 1	protein-coding	1	0	0	0	0	0	1	0	0	0	0	0	0	0	0	0	1	0	0	0	1	0	1
29	ABR	ASD ID/DD	3	nonsynonymous SNV	17p13.3	active BCR-related	protein-coding	0	0	0	0	0	0	1	0	0	0	0	0	0	0	0	1	0	0	0	0	1	0	1
8850	KAT2B	ASD ID/DD	2	splice-site mutation,nonsynonymous SNV	3p24.3	lysine acetyltransferase 2B	protein-coding	1	0	0	0	0	0	0	0	0	0	0	0	0	0	0	0	1	0	0	0	1	0	1
495	ATP4A	ASD ID/DD	2	nonsynonymous SNV	19q13.12	ATPase H+/K+ transporting alpha subunit	protein-coding	0	0	0	0	0	0	0	0	0	0	0	0	0	0	0	0	0	0	0	0	0	0	0
7337	UBE3A	ASD ID/DD	2	nonsynonymous SNV,frameshift insertion	15q11.2	ubiquitin protein ligase E3A	protein-coding	1	1	0	0	0	0	0	0	0	0	0	0	1	1	1	0	0	1	1	1	0	0	1
9126	SMC3	ASD ID/DD	6	nonsynonymous SNV,frameshift deletion	10q25.2	structural maintenance of chromosomes 3	protein-coding	0	0	0	0	0	0	0	0	1	0	0	0	0	0	0	0	0	1	0	1	0	1	1
57647	DHX37	ASD ID/DD	3	nonsynonymous SNV	12q24.31	DEAH-box helicase 37	protein-coding	0	0	0	0	0	0	0	0	0	0	0	0	0	0	0	0	0	0	0	0	0	0	1
23534	TNPO3	ASD ID/DD	7	nonsynonymous SNV,frameshift deletion,splice-site mutation	7q32.1	transportin 3	protein-coding	1	0	0	0	0	0	0	0	0	0	0	0	0	0	0	0	0	1	0	0	0	0	0
84623	KIRREL3	ASD ID/DD	3	nonsynonymous SNV	11q24.2	kirre like nephrin family adhesion molecule 3	protein-coding	0	0	0	0	0	0	0	0	0	0	0	0	1	0	0	0	0	0	0	0	0	0	1
26986	PABPC1	ASD ID/DD	2	nonsynonymous SNV,synonymous SNV	8q22.3	poly(A) binding protein cytoplasmic 1	protein-coding	0	0	0	0	0	0	0	0	1	0	0	0	0	0	0	0	0	0	0	0	0	0	1
11280	SCN11A	ASD ID/DD	3	nonsynonymous SNV,synonymous SNV	3p22.2	sodium voltage-gated channel alpha subunit 11	protein-coding	0	0	0	0	0	0	0	0	0	0	0	0	1	0	1	0	0	0	0	0	0	0	0
29998	BICRA	ASD ID/DD	4	frameshift deletion,nonsynonymous SNV,synonymous SNV	19q13.33	BRD4 interacting chromatin remodeling complex associated protein	protein-coding	0	0	0	0	0	0	0	0	0	0	0	0	0	0	0	0	0	0	0	0	0	0	1
27072	VPS41	ASD ID/DD	2	synonymous SNV,nonsynonymous SNV	7p14.1	VPS41, HOPS complex subunit	protein-coding	0	0	0	0	0	0	1	0	1	0	0	0	0	0	0	0	0	0	0	0	0	0	0
81442	OR6N2	ASD ID/DD	2	synonymous SNV,nonsynonymous SNV	1q23.1	olfactory receptor family 6 subfamily N member 2	protein-coding	0	0	0	0	0	0	0	0	0	0	0	0	0	0	0	0	0	0	0	0	0	0	0
5310	PKD1	ASD ID/DD	4	synonymous SNV,nonsynonymous SNV	16p13.3	polycystin 1, transient receptor potential channel interacting	protein-coding	0	1	0	0	0	0	1	0	0	0	0	0	0	0	0	0	0	0	0	0	0	0	1
8493	PPM1D	ASD ID/DD	8	stopgain,frameshift deletion,frameshift insertion	17q23.2	protein phosphatase, Mg2+/Mn2+ dependent 1D	protein-coding	0	1	0	0	0	0	0	0	0	0	0	0	0	0	0	0	0	1	1	0	0	1	0
9683	N4BP1	ASD ID/DD	2	nonsynonymous SNV	16q12.1	NEDD4 binding protein 1	protein-coding	1	0	0	0	0	0	0	0	0	0	0	0	0	0	0	0	0	1	0	0	0	0	0
55209	SETD5	ASD ID/DD	24	nonsynonymous SNV,stopgain,frameshift deletion,frameshift insertion,splice-site mutation,synonymous SNV	3p25.3	SET domain containing 5	protein-coding	1	0	0	0	0	0	1	1	0	0	0	0	0	0	0	0	1	1	1	1	1	1	1
51322	WAC	ASD ID/DD	9	frameshift deletion,frameshift insertion,nonsynonymous SNV,splice-site mutation,stopgain	10p12.1|10p12.1-p11.2	WW domain containing adaptor with coiled-coil	protein-coding	1	0	0	0	0	0	0	1	0	0	0	0	0	0	0	0	1	0	1	1	1	1	1
23416	KCNH3	ASD ID/DD	2	nonsynonymous SNV,synonymous SNV	12q13.12	potassium voltage-gated channel subfamily H member 3	protein-coding	0	0	0	0	0	0	1	0	0	0	0	0	1	1	1	0	0	0	0	0	0	0	1
4209	MEF2D	ASD ID/DD	2	nonsynonymous SNV	1q22	myocyte enhancer factor 2D	protein-coding	0	0	0	0	0	0	1	1	0	0	0	0	0	0	0	0	0	0	0	0	0	0	1
731220	RFX8	ASD ID/DD	3	nonsynonymous SNV	2q11.2	RFX family member 8, lacking RFX DNA binding domain	protein-coding	0	0	1	0	0	0	0	0	0	0	0	0	0	0	0	0	0	0	0	0	0	0	0
10509	SEMA4B	ASD ID/DD	2	nonsynonymous SNV	15q26.1	semaphorin 4B	protein-coding	0	0	0	0	0	0	0	0	0	0	0	0	0	0	0	0	0	0	0	0	0	0	0
23362	PSD3	ASD ID/DD	2	frameshift deletion	8p22	pleckstrin and Sec7 domain containing 3	protein-coding	0	0	0	0	0	0	0	0	1	0	0	0	0	0	0	0	0	0	0	0	0	0	0
55102	ATG2B	ASD ID/DD	3	nonsynonymous SNV,synonymous SNV	14q32.2	autophagy related 2B	protein-coding	1	0	0	0	0	0	1	0	0	0	0	0	0	0	0	0	0	0	0	0	0	0	0
51222	ZNF219	ASD ID/DD	2	nonsynonymous SNV	14q11.2	zinc finger protein 219	protein-coding	0	0	1	0	0	0	0	0	0	0	0	0	0	0	0	0	0	0	0	0	0	0	1
581	BAX	ASD ID/DD	2	synonymous SNV,nonsynonymous SNV	19q13.33	BCL2 associated X, apoptosis regulator	protein-coding	0	0	0	0	0	0	0	0	0	0	0	0	0	0	0	0	0	0	0	0	0	0	0
23379	ICE1	ASD ID/DD	3	nonsynonymous SNV,synonymous SNV	5p15.32	interactor of little elongation complex ELL subunit 1	protein-coding	1	0	0	0	0	0	1	0	0	0	0	0	0	0	0	0	0	0	0	0	0	0	1
116931	MED12L	ASD ID/DD	2	nonsynonymous SNV	3q25.1	mediator complex subunit 12 like	protein-coding	0	0	0	0	0	0	0	0	0	0	0	0	0	0	0	0	0	0	0	0	1	0	1
6709	SPTAN1	ASD ID/DD	5	nonsynonymous SNV,synonymous SNV	9q34.11	spectrin alpha, non-erythrocytic 1	protein-coding	0	0	0	0	0	0	1	1	0	0	0	1	0	0	0	0	0	0	0	0	0	0	1
6097	RORC	ASD ID/DD	3	nonsynonymous SNV,synonymous SNV	1q21.3	RAR related orphan receptor C	protein-coding	0	0	1	0	0	0	0	0	0	0	0	0	0	0	0	0	0	0	0	0	0	0	1
51560	RAB6B	ASD ID/DD	2	synonymous SNV,nonsynonymous SNV	3q22.1	RAB6B, member RAS oncogene family	protein-coding	0	0	0	0	0	0	0	0	0	0	0	0	1	0	0	0	0	0	0	0	0	0	0
8913	CACNA1G	ASD ID/DD	2	nonsynonymous SNV	17q21.33	calcium voltage-gated channel subunit alpha1 G	protein-coding	0	0	0	0	0	0	1	1	0	0	0	0	1	0	1	0	0	0	1	0	0	0	1
775	CACNA1C	ASD ID/DD	4	nonsynonymous SNV,frameshift deletion,synonymous SNV	12p13.33	calcium voltage-gated channel subunit alpha1 C	protein-coding	0	1	0	0	0	0	0	1	1	0	0	0	1	0	0	0	0	0	0	0	0	0	1
20	ABCA2	ASD ID/DD	4	nonsynonymous SNV,synonymous SNV	9q34.3	ATP binding cassette subfamily A member 2	protein-coding	0	0	0	0	0	0	1	0	0	0	0	0	1	0	0	0	0	0	0	0	0	0	1
112802	KRT71	ASD ID/DD	2	nonsynonymous SNV,synonymous SNV	12q13.13	keratin 71	protein-coding	0	0	0	0	0	0	0	0	0	0	0	0	0	0	0	0	0	0	0	0	0	0	0
7750	ZMYM2	ASD ID/DD	2	splice-site mutation,frameshift insertion	13q12.11	zinc finger MYM-type containing 2	protein-coding	1	0	0	0	0	0	0	0	0	0	0	0	0	0	0	0	0	1	0	0	0	0	1
11152	WDR45	ASD ID/DD	11	nonsynonymous SNV,splice-site mutation,stopgain,frameshift deletion	Xp11.23	WD repeat domain 45	protein-coding	1	0	0	0	0	0	0	0	0	0	0	0	0	0	0	0	0	0	1	0	0	1	1
147798	TMC4	ASD ID/DD	2	nonsynonymous SNV,nonframeshift deletion	19q13.42	transmembrane channel like 4	protein-coding	0	0	0	0	0	0	0	0	0	0	0	0	0	0	0	0	0	0	0	0	0	0	0
4139	MARK1	ASD ID/DD	2	synonymous SNV,nonsynonymous SNV	1q41	microtubule affinity regulating kinase 1	protein-coding	0	0	0	0	0	0	0	0	0	0	0	0	0	0	0	0	0	1	0	0	0	0	1
3030	HADHA	ASD ID/DD	2	nonsynonymous SNV,synonymous SNV	2p23.3	hydroxyacyl-CoA dehydrogenase trifunctional multienzyme complex subunit alpha	protein-coding	1	1	0	0	0	0	0	0	1	0	0	0	0	0	0	0	0	0	1	0	0	0	0
57524	CASKIN1	ASD ID/DD	4	synonymous SNV,nonsynonymous SNV	16p13.3	CASK interacting protein 1	protein-coding	0	0	0	0	0	0	1	0	1	0	0	0	0	0	0	0	0	0	0	0	0	0	1
2583	B4GALNT1	ASD ID/DD	2	frameshift insertion,nonsynonymous SNV	12q13.3	beta-1,4-N-acetyl-galactosaminyltransferase 1	protein-coding	0	0	0	0	0	0	0	0	0	0	0	0	0	0	0	0	0	0	0	0	0	0	0
9423	NTN1	ASD ID/DD	2	nonsynonymous SNV,synonymous SNV	17p13.1	netrin 1	protein-coding	0	1	0	0	1	0	0	0	0	0	0	0	1	0	0	0	0	0	0	0	0	0	0
92017	SNX29	ASD ID/DD	2	synonymous SNV	16p13.13-p13.12	sorting nexin 29	protein-coding	0	0	0	0	0	0	0	0	0	0	0	0	0	0	0	0	0	0	0	0	0	0	0
146059	CDAN1	ASD ID/DD	3	frameshift deletion,synonymous SNV	15q15.2	codanin 1	protein-coding	0	1	0	0	0	0	0	0	0	0	0	0	0	0	0	0	0	0	0	0	0	0	1
167153	PAPD4	ASD ID/DD	3	nonsynonymous SNV,frameshift insertion	5q14.1	poly(A) RNA polymerase D4, non-canonical	protein-coding	1	0	0	0	0	0	0	0	0	0	0	0	0	0	0	0	0	0	0	0	0	0	0
3217	HOXB7	ASD ID/DD	2	nonsynonymous SNV	17q21.32	homeobox B7	protein-coding	0	0	1	0	0	0	0	0	0	0	0	0	0	0	0	0	0	0	0	0	0	0	0
2116	ETV2	ASD ID/DD	2	stopgain,nonsynonymous SNV	19q13.12	ETS variant 2	protein-coding	0	1	1	0	0	0	0	0	0	0	0	0	0	0	0	0	0	0	0	0	0	0	0
23247	KIAA0556	ASD ID/DD	2	synonymous SNV,nonsynonymous SNV	16p12.1	KIAA0556	protein-coding	0	0	0	0	0	0	0	0	0	0	0	0	0	0	0	0	0	0	0	0	0	0	0
55036	CCDC40	ASD ID/DD	3	nonsynonymous SNV	17q25.3	coiled-coil domain containing 40	protein-coding	0	1	0	0	0	0	0	0	0	0	0	0	0	0	0	0	0	0	1	0	0	0	0
23514	SPIDR	ASD ID/DD	2	synonymous SNV	8q11.21	scaffolding protein involved in DNA repair	protein-coding	0	0	0	0	0	0	0	0	0	0	0	0	0	0	0	0	0	0	0	0	0	0	0
89887	ZNF628	ASD ID/DD	2	synonymous SNV,nonsynonymous SNV	19q13.42	zinc finger protein 628	protein-coding	0	0	1	0	0	0	0	0	0	0	0	0	0	0	0	0	0	0	0	0	0	0	1
57497	LRFN2	ASD ID/DD	4	frameshift deletion,nonsynonymous SNV	6p21.2-p21.1	leucine rich repeat and fibronectin type III domain containing 2	protein-coding	0	0	0	0	1	0	0	0	0	0	0	0	0	0	0	0	0	0	0	0	0	0	0
10844	TUBGCP2	ASD ID/DD	4	nonsynonymous SNV	10q26.3	tubulin gamma complex associated protein 2	protein-coding	1	0	0	0	0	0	0	0	0	0	0	0	0	0	0	0	0	0	0	0	0	0	0
5238	PGM3	ASD ID/DD	2	synonymous SNV,nonsynonymous SNV	6q14.1	phosphoglucomutase 3	protein-coding	0	1	0	0	0	0	0	0	0	0	0	0	0	0	0	0	0	0	1	0	0	0	0
50509	COL5A3	ASD ID/DD	4	splice-site mutation,nonsynonymous SNV	19p13.2	collagen type V alpha 3 chain	protein-coding	0	0	0	0	0	0	0	0	0	0	0	0	0	0	0	0	0	0	0	0	0	0	0
2626	GATA4	ASD ID/DD	3	nonsynonymous SNV,synonymous SNV	8p23.1	GATA binding protein 4	protein-coding	0	1	1	0	0	0	0	0	0	0	0	0	0	0	0	0	0	0	1	0	0	0	0
1294	COL7A1	ASD ID/DD	6	nonsynonymous SNV,synonymous SNV,frameshift deletion	3p21.31	collagen type VII alpha 1 chain	protein-coding	0	1	0	0	0	0	0	0	0	0	0	0	0	0	0	0	0	0	0	0	0	0	0
10016	PDCD6	ASD ID/DD	2	nonsynonymous SNV	5p15.33	programmed cell death 6	protein-coding	1	0	0	0	0	0	0	0	0	0	0	0	0	0	0	0	0	0	0	0	0	0	0
8701	DNAH11	ASD ID/DD	8	nonsynonymous SNV,synonymous SNV,frameshift deletion	7p15.3	dynein axonemal heavy chain 11	protein-coding	0	0	0	0	0	0	0	0	0	0	0	0	0	0	0	0	0	0	0	0	0	0	0
6874	TAF4	ASD ID/DD	2	frameshift deletion,synonymous SNV	20q13.33	TATA-box binding protein associated factor 4	protein-coding	1	1	0	0	0	0	0	0	0	0	0	0	0	0	0	0	0	1	0	0	1	0	1
3607	FOXK2	ASD ID/DD	6	nonsynonymous SNV,synonymous SNV	17q25.3	forkhead box K2	protein-coding	1	0	1	0	0	0	1	0	0	0	0	0	0	0	0	0	0	0	0	0	0	0	1
8029	CUBN	ASD ID/DD	5	stopgain,synonymous SNV,nonsynonymous SNV	10p13	cubilin	protein-coding	0	1	0	0	0	0	0	0	0	0	0	0	0	0	0	0	0	0	0	0	0	0	0
128611	ZNF831	ASD ID/DD	5	nonsynonymous SNV	20q13.32	zinc finger protein 831	protein-coding	0	0	0	0	0	0	0	0	0	0	0	0	0	0	0	0	0	0	0	0	0	0	0
5578	PRKCA	ASD ID/DD	7	nonsynonymous SNV,synonymous SNV	17q24.2	protein kinase C alpha	protein-coding	0	0	0	0	0	0	0	0	1	0	0	0	0	0	0	1	0	0	0	0	0	0	1
26031	OSBPL3	ASD ID/DD	2	stopgain,synonymous SNV	7p15.3	oxysterol binding protein like 3	protein-coding	0	0	0	0	0	0	0	1	0	0	0	0	0	0	0	0	0	0	0	0	0	0	0
7982	ST7	ASD ID/DD	2	nonsynonymous SNV,synonymous SNV	7q31.2	suppression of tumorigenicity 7	protein-coding	1	0	0	0	0	0	0	1	0	0	0	0	0	0	0	0	0	1	0	0	0	0	1
8661	EIF3A	ASD ID/DD	2	synonymous SNV,nonframeshift deletion	10q26.11	eukaryotic translation initiation factor 3 subunit A	protein-coding	1	0	0	0	0	0	0	0	0	0	0	0	0	0	0	0	0	1	0	0	0	0	1
9187	SLC24A1	ASD ID/DD	4	nonsynonymous SNV,synonymous SNV	15q22.31	solute carrier family 24 member 1	protein-coding	0	0	0	0	0	0	0	0	0	0	0	0	0	0	0	0	0	0	1	0	0	0	0
146909	KIF18B	ASD ID/DD	2	synonymous SNV	17q21.31	kinesin family member 18B	protein-coding	0	0	0	0	0	0	0	0	0	0	0	0	0	0	0	0	0	0	0	0	0	0	0
10044	SH2D3C	ASD ID/DD	2	nonsynonymous SNV	9q34.11	SH2 domain containing 3C	protein-coding	0	1	0	0	0	0	0	0	0	0	0	0	1	0	0	0	0	0	0	0	0	0	0
649	BMP1	ASD ID/DD	3	nonsynonymous SNV,synonymous SNV	8p21.3	bone morphogenetic protein 1	protein-coding	0	1	0	0	0	0	0	0	0	0	0	0	0	0	0	0	0	0	0	0	0	0	0
118856	MMP21	ASD ID/DD	3	nonsynonymous SNV,frameshift deletion	10q26.2	matrix metallopeptidase 21	protein-coding	0	0	0	0	0	0	0	0	0	0	0	0	0	0	0	0	0	0	1	0	0	0	0
4849	CNOT3	ASD ID/DD	8	frameshift deletion,frameshift insertion,nonsynonymous SNV,stopgain	19q13.42	CCR4-NOT transcription complex subunit 3	protein-coding	1	1	0	0	0	0	0	0	0	0	0	0	0	0	0	0	0	1	1	1	1	0	1
55092	TMEM51	ASD ID/DD	2	nonsynonymous SNV	1p36.21	transmembrane protein 51	protein-coding	0	0	0	0	0	0	0	0	0	0	0	0	0	0	0	0	0	0	0	0	0	0	0
343990	KIAA1211L	ASD ID/DD	2	nonsynonymous SNV	2q11.2	KIAA1211 like	protein-coding	0	0	0	0	0	0	0	0	0	0	0	0	0	0	0	0	0	0	0	0	0	0	0
8476	CDC42BPA	ASD ID/DD	4	nonsynonymous SNV,synonymous SNV	1q42.13	CDC42 binding protein kinase alpha	protein-coding	0	0	0	0	0	0	1	1	0	0	0	0	0	0	0	0	0	0	0	0	0	0	1
51129	ANGPTL4	ASD ID/DD	2	nonsynonymous SNV,synonymous SNV	19p13.2	angiopoietin like 4	protein-coding	0	1	0	0	0	0	0	0	0	0	0	0	0	0	0	0	0	0	0	0	0	0	0
5129	CDK18	ASD ID/DD	2	nonsynonymous SNV	1q32.1	cyclin dependent kinase 18	protein-coding	0	0	0	0	0	0	0	0	0	0	0	0	0	0	0	0	0	0	0	0	0	0	0
5362	PLXNA2	ASD ID/DD	4	nonsynonymous SNV,synonymous SNV	1q32.2	plexin A2	protein-coding	0	0	0	0	0	0	1	0	1	0	0	0	1	0	0	0	0	1	0	0	0	0	1
131873	COL6A6	ASD ID/DD	2	splice-site mutation,synonymous SNV	3q22.1	collagen type VI alpha 6 chain	protein-coding	0	0	0	0	0	0	0	0	0	0	0	0	0	0	0	0	0	0	0	0	0	0	0
23527	ACAP2	ASD ID/DD	2	nonsynonymous SNV,synonymous SNV	3q29	ArfGAP with coiled-coil, ankyrin repeat and PH domains 2	protein-coding	0	0	0	0	0	0	0	1	0	0	0	0	0	0	0	0	0	0	0	0	0	0	1
54856	GON4L	ASD ID/DD	4	synonymous SNV,nonsynonymous SNV	1q22	gon-4 like	protein-coding	0	0	0	0	0	0	0	0	0	0	0	0	0	0	0	0	0	1	1	0	0	0	1
11198	SUPT16H	ASD ID/DD	2	nonsynonymous SNV,nonframeshift deletion	14q11.2	SPT16 homolog, facilitates chromatin remodeling subunit	protein-coding	0	0	0	0	0	0	0	0	0	0	0	0	0	0	0	0	1	1	0	0	0	0	1
11177	BAZ1A	ASD ID/DD	3	nonsynonymous SNV,splice-site mutation	14q13.1-q13.2	bromodomain adjacent to zinc finger domain 1A	protein-coding	0	0	0	0	0	0	0	0	0	0	0	0	0	0	0	0	1	1	0	0	0	0	1
5934	RBL2	ASD ID/DD	4	synonymous SNV,nonsynonymous SNV	16q12.2	RB transcriptional corepressor like 2	protein-coding	0	1	0	0	0	0	0	0	0	0	0	0	0	0	0	0	0	0	0	0	0	0	1
10451	VAV3	ASD ID/DD	3	nonsynonymous SNV,frameshift deletion	1p13.3	vav guanine nucleotide exchange factor 3	protein-coding	0	0	0	0	0	0	0	0	0	0	0	0	0	0	0	0	0	0	0	0	0	0	0
8509	NDST2	ASD ID/DD	2	nonsynonymous SNV	10q22.2	N-deacetylase and N-sulfotransferase 2	protein-coding	0	0	0	0	0	0	0	0	0	0	0	0	0	0	0	0	0	0	0	0	0	0	0
9665	MARF1	ASD ID/DD	3	nonsynonymous SNV,stopgain,synonymous SNV	16p13.11	meiosis regulator and mRNA stability factor 1	protein-coding	0	0	0	0	0	0	1	0	0	0	0	0	0	0	0	0	0	0	0	0	1	0	1
84146	ZNF644	ASD ID/DD	4	nonsynonymous SNV,frameshift deletion	1p22.2	zinc finger protein 644	protein-coding	1	0	1	0	0	0	0	0	0	0	0	0	0	0	0	0	0	1	0	0	0	0	1
1655	DDX5	ASD ID/DD	2	nonsynonymous SNV	17q23.3	DEAD-box helicase 5	protein-coding	0	1	0	0	0	0	0	0	1	0	0	0	0	0	0	0	0	1	0	0	0	0	1
9152	SLC6A5	ASD ID/DD	3	nonsynonymous SNV,synonymous SNV	11p15.1	solute carrier family 6 member 5	protein-coding	0	1	0	0	0	0	0	0	0	0	0	0	1	0	0	0	0	0	1	0	0	0	0
130916	MTERF4	ASD ID/DD	2	nonsynonymous SNV	2q37.3	mitochondrial transcription termination factor 4	protein-coding	1	1	0	0	0	0	0	0	0	0	0	0	0	0	0	0	0	0	0	0	0	0	0
25943	C20orf194	ASD ID/DD	2	frameshift deletion,synonymous SNV	20p13	chromosome 20 open reading frame 194	protein-coding	0	0	0	0	0	0	0	0	0	0	0	0	0	0	0	0	0	0	0	0	0	0	0
83872	HMCN1	ASD ID/DD	3	synonymous SNV,nonsynonymous SNV	1q25.3-q31.1	hemicentin 1	protein-coding	0	0	0	0	0	0	0	0	0	0	0	0	0	0	0	0	0	0	0	0	0	0	0
4621	MYH3	ASD ID/DD	2	nonsynonymous SNV	17p13.1	myosin heavy chain 3	protein-coding	0	0	0	0	0	0	0	0	0	0	0	0	0	0	0	0	0	0	0	0	0	0	0
5159	PDGFRB	ASD ID/DD	3	nonsynonymous SNV,stopgain	5q32	platelet derived growth factor receptor beta	protein-coding	0	1	0	0	0	0	0	0	0	0	0	0	0	0	0	0	0	0	0	0	0	0	1
1773	DNASE1	ASD ID/DD	2	nonsynonymous SNV	16p13.3	deoxyribonuclease 1	protein-coding	0	0	0	0	0	0	0	0	0	0	0	0	0	0	0	0	0	0	0	0	0	0	0
360023	ZBTB41	ASD ID/DD	3	nonsynonymous SNV	1q31.3	zinc finger and BTB domain containing 41	protein-coding	0	0	1	0	0	0	0	0	0	0	0	0	0	0	0	0	0	1	0	0	0	0	0
23350	U2SURP	ASD ID/DD	2	nonsynonymous SNV	3q23	U2 snRNP associated SURP domain containing	protein-coding	0	0	0	0	0	0	0	0	0	0	0	0	0	0	0	0	0	0	0	0	0	0	1
4253	MIA2	ASD ID/DD	3	nonsynonymous SNV,stopgain	14q21.1	melanoma inhibitory activity 2	protein-coding	1	0	0	0	0	0	0	0	0	0	0	0	0	0	0	0	0	0	0	0	0	0	0
5442	POLRMT	ASD ID/DD	2	stopgain,synonymous SNV	19p13.3	RNA polymerase mitochondrial	protein-coding	0	0	0	0	0	0	0	0	0	0	0	0	0	0	0	0	0	0	0	0	0	0	0
2	A2M	ASD ID/DD	3	nonsynonymous SNV,synonymous SNV	12p13.31	alpha-2-macroglobulin	protein-coding	0	0	0	0	0	0	0	0	0	0	0	0	0	0	0	0	0	0	0	0	0	0	0
134957	STXBP5	ASD ID/DD	4	frameshift deletion,nonsynonymous SNV	6q24.3	syntaxin binding protein 5	protein-coding	0	1	0	0	0	0	1	0	1	0	0	0	0	1	0	1	0	0	0	0	1	0	1
9887	SMG7	ASD ID/DD	2	nonsynonymous SNV,synonymous SNV	1q25.3	SMG7, nonsense mediated mRNA decay factor	protein-coding	1	0	0	0	0	0	0	0	0	0	0	0	0	0	0	0	0	0	0	0	0	0	1
2125	EVPL	ASD ID/DD	2	nonsynonymous SNV,synonymous SNV	17q25.1	envoplakin	protein-coding	0	0	0	0	0	0	0	0	0	0	0	0	0	0	0	0	0	0	0	0	0	0	0
22998	LIMCH1	ASD ID/DD	3	nonsynonymous SNV,synonymous SNV	4p13	LIM and calponin homology domains 1	protein-coding	0	0	0	0	0	0	0	1	0	0	0	0	0	0	0	0	0	0	0	0	0	0	1
64478	CSMD1	ASD ID/DD	9	nonsynonymous SNV,synonymous SNV	8p23.2	CUB and Sushi multiple domains 1	protein-coding	0	0	0	0	0	0	0	0	0	0	0	0	0	0	0	0	0	0	0	0	0	0	0
116987	AGAP1	ASD ID/DD	4	nonsynonymous SNV,synonymous SNV	2q37.2	ArfGAP with GTPase domain, ankyrin repeat and PH domain 1	protein-coding	0	0	0	0	0	0	1	0	1	0	0	0	0	0	0	0	0	0	0	0	0	0	1
10048	RANBP9	ASD ID/DD	2	synonymous SNV,nonsynonymous SNV	6p23	RAN binding protein 9	protein-coding	0	1	0	0	0	0	0	0	1	0	0	0	0	0	0	0	0	0	0	0	0	0	1
60312	AFAP1	ASD ID/DD	2	nonsynonymous SNV,synonymous SNV	4p16.1	actin filament associated protein 1	protein-coding	0	0	0	0	0	0	0	0	0	0	0	0	0	0	0	0	0	0	0	0	0	0	0
57214	CEMIP	ASD ID/DD	3	nonsynonymous SNV	15q25.1	cell migration inducing hyaluronan binding protein	protein-coding	0	0	0	0	0	0	0	0	0	0	0	0	0	0	0	0	0	0	0	0	0	0	0
93035	PKHD1L1	ASD ID/DD	2	nonsynonymous SNV	8q23.1-q23.2	PKHD1 like 1	protein-coding	0	0	0	0	0	0	0	0	0	0	0	0	0	0	0	0	0	0	0	0	0	0	0
112939	NACC1	ASD ID/DD	5	splice-site mutation,nonsynonymous SNV,synonymous SNV	19p13.13	nucleus accumbens associated 1	protein-coding	1	0	0	0	0	0	0	0	0	0	0	0	1	0	0	0	0	0	0	1	1	0	1
6711	SPTBN1	ASD ID/DD	3	nonsynonymous SNV,stopgain,splice-site mutation	2p16.2	spectrin beta, non-erythrocytic 1	protein-coding	0	1	0	0	0	0	1	0	1	0	1	0	0	0	0	0	0	0	0	0	1	0	1
3687	ITGAX	ASD ID/DD	2	synonymous SNV	16p11.2	integrin subunit alpha X	protein-coding	0	0	0	0	1	0	0	0	1	0	0	0	0	0	0	0	0	0	0	0	0	0	0
170954	PPP1R18	ASD ID/DD	2	synonymous SNV,nonsynonymous SNV	6p21.33	protein phosphatase 1 regulatory subunit 18	protein-coding	0	0	0	0	0	0	0	0	0	0	0	0	0	0	0	0	0	0	0	0	0	0	0
54439	RBM27	ASD ID/DD	3	nonsynonymous SNV	5q32	RNA binding motif protein 27	protein-coding	1	0	0	0	0	0	0	0	0	0	0	0	0	0	0	0	0	0	0	0	0	0	1
11144	DMC1	ASD ID/DD	2	synonymous SNV	22q13.1	DNA meiotic recombinase 1	protein-coding	0	0	0	0	0	0	0	0	0	0	0	0	0	0	0	0	0	0	0	0	0	0	0
53335	BCL11A	ASD ID/DD	9	frameshift insertion,frameshift deletion,nonsynonymous SNV,stopgain	2p16.1	B-cell CLL/lymphoma 11A	protein-coding	0	1	1	0	0	0	0	0	0	0	0	0	0	0	0	0	0	1	1	1	1	0	0
221074	SLC39A12	ASD ID/DD	4	nonsynonymous SNV	10p12.33	solute carrier family 39 member 12	protein-coding	0	0	0	0	0	0	0	0	0	0	0	0	0	0	0	0	0	0	0	0	0	0	0
6398	SECTM1	ASD ID/DD	3	nonsynonymous SNV,frameshift deletion,synonymous SNV	17q25.3	secreted and transmembrane 1	protein-coding	0	0	0	0	0	0	0	0	0	0	0	0	0	0	0	0	0	0	0	0	0	0	0
7088	TLE1	ASD ID/DD	3	nonsynonymous SNV,synonymous SNV	9q21.32	transducin like enhancer of split 1	protein-coding	1	0	0	0	0	0	0	0	0	0	0	0	0	0	0	0	0	0	0	0	0	0	1
3283	HSD3B1	ASD ID/DD	2	nonsynonymous SNV	1p12	hydroxy-delta-5-steroid dehydrogenase, 3 beta- and steroid delta-isomerase 1	protein-coding	0	0	0	0	0	0	0	0	0	0	0	0	0	0	0	0	0	0	0	0	0	0	0
2312	FLG	ASD ID/DD	3	frameshift deletion,synonymous SNV,nonsynonymous SNV	1q21.3	filaggrin	protein-coding	0	1	0	0	0	0	0	0	0	0	0	0	0	0	0	0	0	0	1	0	0	0	0
19	ABCA1	ASD ID/DD	2	nonsynonymous SNV	9q31.1	ATP binding cassette subfamily A member 1	protein-coding	0	1	0	0	0	0	0	0	0	0	0	0	0	0	0	0	0	0	0	0	0	0	0
94160	ABCC12	ASD ID/DD	4	synonymous SNV,nonsynonymous SNV	16q12.1	ATP binding cassette subfamily C member 12	protein-coding	0	0	0	0	0	0	0	0	0	0	0	0	0	0	0	0	0	0	0	0	0	0	0
9181	ARHGEF2	ASD ID/DD	2	nonsynonymous SNV,frameshift deletion	1q22	Rho/Rac guanine nucleotide exchange factor 2	protein-coding	0	0	0	0	0	0	1	0	1	0	0	0	0	0	0	1	0	0	0	0	0	0	1
116444	GRIN3B	ASD ID/DD	2	synonymous SNV,nonsynonymous SNV	19p13.3	glutamate ionotropic receptor NMDA type subunit 3B	protein-coding	0	0	0	0	0	0	0	0	0	0	0	0	1	0	0	0	0	0	0	0	0	0	0
57585	CRAMP1	ASD ID/DD	4	synonymous SNV,frameshift insertion,nonsynonymous SNV	16p13.3	cramped chromatin regulator homolog 1	protein-coding	0	0	0	0	0	0	0	0	0	0	0	0	0	0	0	0	0	0	0	0	0	0	0
10765	KDM5B	ASD ID/DD	11	frameshift insertion,nonsynonymous SNV,stopgain,synonymous SNV	1q32.1	lysine demethylase 5B	protein-coding	0	0	0	0	0	0	0	0	0	0	0	0	0	0	0	0	0	1	1	0	0	0	0
79834	PEAK1	ASD ID/DD	2	nonsynonymous SNV	15q24.3	pseudopodium enriched atypical kinase 1	protein-coding	0	0	0	0	1	0	0	0	0	0	0	0	0	0	0	0	0	0	0	0	0	0	0
5976	UPF1	ASD ID/DD	7	nonsynonymous SNV,synonymous SNV	19p13.11	UPF1, RNA helicase and ATPase	protein-coding	1	1	0	0	0	0	0	0	0	0	0	0	0	0	0	1	0	0	0	0	0	0	1
111	ADCY5	ASD ID/DD	4	nonsynonymous SNV,synonymous SNV	3q21.1	adenylate cyclase 5	protein-coding	0	0	0	0	0	0	1	0	0	0	0	0	1	0	0	0	0	0	0	0	0	1	1
57178	ZMIZ1	ASD ID/DD	3	synonymous SNV,frameshift insertion,nonsynonymous SNV	10q22.3	zinc finger MIZ-type containing 1	protein-coding	0	1	0	0	0	0	1	0	0	0	0	0	0	0	0	0	0	1	0	0	0	0	1
8912	CACNA1H	ASD ID/DD	6	nonsynonymous SNV,nonframeshift deletion	16p13.3	calcium voltage-gated channel subunit alpha1 H	protein-coding	0	0	0	0	0	0	0	0	0	0	0	0	0	0	0	0	0	0	0	0	1	0	0
50485	SMARCAL1	ASD ID/DD	2	nonsynonymous SNV	2q35	SWI/SNF related, matrix associated, actin dependent regulator of chromatin, subfamily a like 1	protein-coding	1	0	0	0	0	0	0	0	0	0	0	0	0	0	0	0	1	0	1	0	0	0	0
9254	CACNA2D2	ASD ID/DD	2	synonymous SNV,nonsynonymous SNV	3p21.31	calcium voltage-gated channel auxiliary subunit alpha2delta 2	protein-coding	0	1	0	0	0	0	0	0	1	0	0	0	1	0	1	0	0	0	0	0	0	0	1
23005	MAPKBP1	ASD ID/DD	5	synonymous SNV,nonsynonymous SNV	15q15.1	mitogen-activated protein kinase binding protein 1	protein-coding	0	0	0	0	0	0	1	0	0	0	0	0	0	0	0	0	0	0	0	0	0	0	1
57451	TENM2	ASD ID/DD	6	nonsynonymous SNV	5q34	teneurin transmembrane protein 2	protein-coding	0	0	0	0	0	0	1	0	0	0	0	0	0	0	0	0	0	0	0	0	1	0	1
26098	EDRF1	ASD ID/DD	4	nonsynonymous SNV,synonymous SNV,stopgain	10q26.2	erythroid differentiation regulatory factor 1	protein-coding	0	0	0	0	0	0	0	0	0	0	0	0	0	0	0	0	0	0	0	0	0	0	0
7791	ZYX	ASD ID/DD	2	nonsynonymous SNV	7q34	zyxin	protein-coding	0	0	0	0	1	1	0	0	0	0	0	0	0	0	0	0	0	0	0	0	0	0	0
23506	BICRAL	ASD ID/DD	2	nonsynonymous SNV,synonymous SNV	6p21.1	BRD4 interacting chromatin remodeling complex associated protein like	protein-coding	0	0	0	0	0	0	0	0	0	0	0	0	0	0	0	0	0	0	0	0	0	0	1
675	BRCA2	ASD ID/DD	5	nonsynonymous SNV,frameshift deletion	13q13.1	BRCA2, DNA repair associated	protein-coding	0	1	0	0	0	0	0	0	0	0	0	0	1	0	0	0	0	1	1	0	0	0	0
6529	SLC6A1	ASD ID/DD	14	nonsynonymous SNV,frameshift insertion,splice-site mutation,frameshift deletion	3p25.3	solute carrier family 6 member 1	protein-coding	0	0	0	0	0	0	1	0	0	0	0	0	1	0	0	0	0	0	1	0	1	1	1
4208	MEF2C	ASD ID/DD	9	nonsynonymous SNV,frameshift deletion,frameshift insertion,stopgain	5q14.3	myocyte enhancer factor 2C	protein-coding	0	1	0	0	0	0	0	0	0	0	0	0	0	0	0	0	0	0	1	1	0	0	0
23363	OBSL1	ASD ID/DD	3	nonsynonymous SNV,synonymous SNV	2q35	obscurin like 1	protein-coding	0	0	0	0	0	0	0	0	0	0	0	0	0	0	0	0	0	0	1	0	0	0	0
203062	TSNARE1	ASD ID/DD	4	nonsynonymous SNV,synonymous SNV,nonframeshift deletion	8q24.3	t-SNARE domain containing 1	protein-coding	0	0	0	0	0	0	0	0	0	0	0	0	0	0	0	0	0	0	0	0	0	0	0
9627	SNCAIP	ASD ID/DD	2	nonsynonymous SNV,synonymous SNV	5q23.2	synuclein alpha interacting protein	protein-coding	0	0	0	0	0	0	0	1	0	0	0	0	0	0	0	0	0	1	0	0	0	0	0
200734	SPRED2	ASD ID/DD	3	stopgain,nonsynonymous SNV,frameshift deletion	2p14	sprouty related EVH1 domain containing 2	protein-coding	0	0	0	0	0	0	0	0	0	0	0	0	0	0	0	0	0	0	0	0	0	0	0
21	ABCA3	ASD ID/DD	3	stopgain,nonsynonymous SNV	16p13.3	ATP binding cassette subfamily A member 3	protein-coding	0	1	0	0	0	0	1	0	0	0	0	0	1	0	0	0	0	0	0	0	0	0	0
523	ATP6V1A	ASD ID/DD	2	nonsynonymous SNV	3q13.31	ATPase H+ transporting V1 subunit A	protein-coding	0	0	0	0	0	0	0	0	1	0	0	0	0	0	0	1	0	0	0	0	0	0	1
114803	MYSM1	ASD ID/DD	3	nonsynonymous SNV,splice-site mutation	1p32.1	Myb like, SWIRM and MPN domains 1	protein-coding	0	0	0	0	0	0	0	0	0	0	0	0	1	0	0	0	1	0	0	0	0	0	0
79058	ASPSCR1	ASD ID/DD	3	nonsynonymous SNV	17q25.3	ASPSCR1, UBX domain containing tether for SLC2A4	protein-coding	1	0	0	0	0	0	0	0	0	0	0	0	0	0	0	0	0	0	0	0	0	0	0
90459	ERI1	ASD ID/DD	3	nonsynonymous SNV	8p23.1	exoribonuclease 1	protein-coding	0	1	0	0	0	0	0	0	0	0	0	0	0	0	0	0	0	1	0	0	0	0	0
55721	IQCC	ASD ID/DD	2	nonsynonymous SNV	1p35.2	IQ motif containing C	protein-coding	0	0	0	0	0	0	0	0	0	0	0	0	0	0	0	0	0	0	0	0	0	0	0
4620	MYH2	ASD ID/DD	2	stopgain,synonymous SNV	17p13.1	myosin heavy chain 2	protein-coding	0	0	0	0	0	0	0	0	0	0	0	0	0	0	0	0	0	0	0	0	0	0	0
57662	CAMSAP3	ASD ID/DD	3	synonymous SNV,nonsynonymous SNV	19p13.2	calmodulin regulated spectrin associated protein family member 3	protein-coding	0	0	0	0	0	0	0	0	0	0	0	0	0	0	0	0	0	0	0	0	0	0	1
84684	INSM2	ASD ID/DD	2	nonsynonymous SNV	14q13.2	INSM transcriptional repressor 2	protein-coding	0	0	1	0	0	0	0	0	0	0	0	0	0	0	0	0	0	0	0	0	0	0	0
6540	SLC6A13	ASD ID/DD	4	nonsynonymous SNV	12p13.33	solute carrier family 6 member 13	protein-coding	0	0	0	0	0	0	0	0	0	0	0	0	0	0	0	0	0	0	0	0	0	0	0
84076	TKTL2	ASD ID/DD	2	nonsynonymous SNV,synonymous SNV	4q32.2	transketolase like 2	protein-coding	0	0	0	0	0	0	0	0	0	0	0	0	0	0	0	0	0	0	0	0	0	0	0
200150	PLD5	ASD ID/DD	2	nonsynonymous SNV	1q43	phospholipase D family member 5	protein-coding	0	0	0	0	0	0	0	0	0	0	0	0	0	0	0	0	0	0	0	0	0	0	0
1258	CNGB1	ASD ID/DD	3	nonsynonymous SNV	16q21	cyclic nucleotide gated channel beta 1	protein-coding	0	1	0	0	0	0	0	0	0	0	0	0	0	0	0	0	0	0	0	0	0	0	0
26001	RNF167	ASD ID/DD	2	nonsynonymous SNV,stopgain	17p13.2	ring finger protein 167	protein-coding	1	0	0	0	0	0	0	1	0	0	0	0	0	0	0	0	0	0	0	0	0	0	0
7484	WNT9B	ASD ID/DD	2	nonsynonymous SNV	17q21.32	Wnt family member 9B	protein-coding	0	1	0	0	0	0	0	0	0	0	0	0	0	0	0	0	0	0	0	0	0	0	0
10392	NOD1	ASD ID/DD	2	synonymous SNV	7p14.3	nucleotide binding oligomerization domain containing 1	protein-coding	0	0	0	0	0	0	0	0	0	0	0	0	0	0	0	0	0	0	0	0	0	0	0
55196	KIAA1551	ASD ID/DD	2	synonymous SNV,frameshift deletion	12p11.21	KIAA1551	protein-coding	0	0	0	0	0	0	0	0	0	0	0	0	0	0	0	0	0	0	0	0	0	0	0
54894	RNF43	ASD ID/DD	2	nonsynonymous SNV	17q22	ring finger protein 43	protein-coding	0	0	0	0	0	0	0	0	0	0	0	0	0	0	0	0	0	0	0	0	0	0	0
27	ABL2	ASD ID/DD	2	nonsynonymous SNV	1q25.2	ABL proto-oncogene 2, non-receptor tyrosine kinase	protein-coding	0	0	0	0	0	1	0	0	0	0	0	0	1	0	0	0	0	0	0	0	0	0	0
9231	DLG5	ASD ID/DD	2	synonymous SNV,nonsynonymous SNV	10q22.3	discs large MAGUK scaffold protein 5	protein-coding	0	0	0	0	1	0	1	0	0	0	0	0	1	0	0	0	0	1	0	0	0	0	1
2331	FMOD	ASD ID/DD	2	nonsynonymous SNV	1q32.1	fibromodulin	protein-coding	0	0	0	0	0	0	0	0	0	0	0	0	0	0	0	0	0	0	0	0	0	0	0
3909	LAMA3	ASD ID/DD	3	nonsynonymous SNV	18q11.2	laminin subunit alpha 3	protein-coding	0	1	0	0	1	0	0	0	0	0	0	0	0	0	0	0	0	0	0	0	0	0	0
84986	ARHGAP19	ASD ID/DD	3	nonsynonymous SNV	10q24.1	Rho GTPase activating protein 19	protein-coding	0	0	0	0	0	0	0	0	0	0	0	0	0	0	0	0	0	0	0	0	0	0	0
221476	PI16	ASD ID/DD	2	synonymous SNV,nonsynonymous SNV	6p21.2	peptidase inhibitor 16	protein-coding	0	0	0	0	0	0	0	1	0	0	0	0	0	0	0	0	0	0	0	0	0	0	0
23418	CRB1	ASD ID/DD	2	nonsynonymous SNV,stopgain	1q31.3	crumbs 1, cell polarity complex component	protein-coding	0	1	0	0	0	0	0	0	0	0	0	0	0	0	0	0	0	0	1	0	0	0	0
80205	CHD9	ASD ID/DD	4	nonsynonymous SNV,synonymous SNV	16q12.2	chromodomain helicase DNA binding protein 9	protein-coding	0	0	0	0	0	0	0	0	0	0	0	0	0	0	0	0	1	1	0	0	0	0	1
3695	ITGB7	ASD ID/DD	3	nonsynonymous SNV,synonymous SNV	12q13.13	integrin subunit beta 7	protein-coding	0	0	0	0	1	0	0	0	0	0	0	0	0	0	0	0	0	0	0	0	0	0	0
60	ACTB	ASD ID/DD	2	nonsynonymous SNV,frameshift insertion	7p22.1	actin beta	protein-coding	0	1	0	0	0	0	1	1	0	0	0	1	1	0	0	0	0	0	0	0	0	0	1
64857	PLEKHG2	ASD ID/DD	2	nonsynonymous SNV	19q13.2	pleckstrin homology and RhoGEF domain containing G2	protein-coding	0	0	0	0	0	0	0	0	0	0	0	0	0	0	0	0	0	1	0	0	0	0	0
5587	PRKD1	ASD ID/DD	6	nonsynonymous SNV	14q12	protein kinase D1	protein-coding	0	1	0	0	0	0	0	0	0	0	0	0	0	0	0	0	0	0	0	0	0	0	0
5453	POU3F1	ASD ID/DD	2	synonymous SNV,nonsynonymous SNV	1p34.3	POU class 3 homeobox 1	protein-coding	0	1	1	0	0	0	0	0	0	0	0	0	0	0	0	0	0	0	0	0	0	0	0
10664	CTCF	ASD ID/DD	9	frameshift insertion,nonsynonymous SNV	16q22.1	CCCTC-binding factor	protein-coding	1	1	1	0	0	0	0	0	0	0	0	0	0	0	0	0	0	1	1	0	0	0	1
57534	MIB1	ASD ID/DD	2	nonsynonymous SNV	18q11.2	mindbomb E3 ubiquitin protein ligase 1	protein-coding	1	1	0	0	0	0	1	0	0	0	0	0	0	0	0	0	0	0	0	0	0	0	0
169355	IDO2	ASD ID/DD	3	nonsynonymous SNV	8p11.21	indoleamine 2,3-dioxygenase 2	protein-coding	0	0	0	0	0	0	0	0	0	0	0	0	0	0	0	0	0	0	0	0	0	0	0
1763	DNA2	ASD ID/DD	3	nonsynonymous SNV	10q21.3	DNA replication helicase/nuclease 2	protein-coding	0	0	0	0	0	0	0	0	0	0	0	0	0	0	0	0	0	0	1	0	0	0	0
25834	MGAT4C	ASD ID/DD	2	nonsynonymous SNV	12q21.31-q21.32	MGAT4 family member C	protein-coding	0	0	0	0	0	0	0	0	0	0	0	0	0	0	0	0	0	0	0	0	0	0	0
1982	EIF4G2	ASD ID/DD	5	nonsynonymous SNV,frameshift insertion,synonymous SNV	11p15.4	eukaryotic translation initiation factor 4 gamma 2	protein-coding	1	1	0	0	0	0	1	0	0	0	0	0	0	0	0	0	0	1	0	0	0	0	0
5226	PGD	ASD ID/DD	2	synonymous SNV,frameshift deletion	1p36.22	phosphogluconate dehydrogenase	protein-coding	0	0	0	0	0	0	0	0	0	0	0	0	1	0	0	0	0	1	0	0	0	0	1
6539	SLC6A12	ASD ID/DD	3	nonsynonymous SNV,synonymous SNV	12p13.33	solute carrier family 6 member 12	protein-coding	0	0	0	0	0	0	0	0	0	0	0	0	0	0	0	0	0	0	0	0	0	0	0
5980	REV3L	ASD ID/DD	4	nonsynonymous SNV,synonymous SNV	6q21	REV3 like, DNA directed polymerase zeta catalytic subunit	protein-coding	0	1	0	0	0	0	1	0	1	0	0	0	0	0	0	0	0	0	0	0	1	0	1
79829	NAA40	ASD ID/DD	2	nonsynonymous SNV	11q13.1	N(alpha)-acetyltransferase 40, NatD catalytic subunit	protein-coding	0	0	0	0	0	0	0	0	0	0	0	0	0	0	0	0	0	1	0	0	0	0	0
5424	POLD1	ASD ID/DD	3	nonsynonymous SNV,synonymous SNV	19q13.33	DNA polymerase delta 1, catalytic subunit	protein-coding	0	1	0	0	0	0	0	0	0	0	0	0	0	0	0	0	0	1	0	0	0	0	0
4892	NRAP	ASD ID/DD	3	nonsynonymous SNV,frameshift insertion	10q25.3	nebulin related anchoring protein	protein-coding	0	0	0	0	0	0	0	1	0	0	0	0	0	0	0	0	0	0	0	0	0	0	0
5164	PDK2	ASD ID/DD	2	nonsynonymous SNV	17q21.33	pyruvate dehydrogenase kinase 2	protein-coding	1	0	0	0	0	0	0	0	0	0	0	0	0	0	0	0	0	0	0	0	0	0	0
4643	MYO1E	ASD ID/DD	6	nonsynonymous SNV,stopgain	15q22.2	myosin IE	protein-coding	1	1	0	0	0	0	0	0	0	0	0	0	0	0	0	0	0	0	0	0	0	0	0
80169	CTC1	ASD ID/DD	3	nonsynonymous SNV	17p13.1	CST telomere replication complex component 1	protein-coding	0	0	0	0	0	0	0	0	0	0	0	0	0	0	0	0	0	0	1	0	0	0	0
3746	KCNC1	ASD ID/DD	2	nonsynonymous SNV	11p15.1	potassium voltage-gated channel subfamily C member 1	protein-coding	0	0	0	0	0	0	0	0	0	0	0	0	0	0	0	1	0	0	0	0	0	0	0
221656	KDM1B	ASD ID/DD	2	stopgain,nonsynonymous SNV	6p22.3	lysine demethylase 1B	protein-coding	0	0	0	0	0	0	0	0	0	0	0	0	0	0	0	0	1	0	0	0	0	0	0
5709	PSMD3	ASD ID/DD	3	nonsynonymous SNV,frameshift deletion	17q21.1	proteasome 26S subunit, non-ATPase 3	protein-coding	1	0	0	0	0	0	0	0	0	0	0	0	0	0	0	0	0	0	0	0	0	0	1
161725	OTUD7A	ASD ID/DD	3	nonframeshift deletion,stopgain	15q13.3	OTU deubiquitinase 7A	protein-coding	0	0	0	0	0	0	0	0	0	0	0	0	0	0	0	0	0	0	0	0	0	0	1
10788	IQGAP2	ASD ID/DD	3	stopgain,nonsynonymous SNV	5q13.3	IQ motif containing GTPase activating protein 2	protein-coding	0	0	0	0	0	0	0	0	0	0	0	0	0	0	0	0	0	1	0	0	0	0	0
2044	EPHA5	ASD ID/DD	2	synonymous SNV,nonsynonymous SNV	4q13.1-q13.2	EPH receptor A5	protein-coding	0	0	0	0	1	0	0	0	0	0	0	0	0	0	0	0	0	1	0	0	0	0	0
23077	MYCBP2	ASD ID/DD	5	nonsynonymous SNV,synonymous SNV	13q22.3	MYC binding protein 2, E3 ubiquitin protein ligase	protein-coding	0	1	0	0	0	0	1	1	0	0	0	0	1	0	0	0	0	0	0	0	0	0	1
57718	PPP4R4	ASD ID/DD	2	synonymous SNV,frameshift deletion	14q32.12-q32.13	protein phosphatase 4 regulatory subunit 4	protein-coding	0	0	0	0	0	0	0	0	0	0	0	0	0	0	0	0	0	0	0	0	0	0	0
90	ACVR1	ASD ID/DD	2	synonymous SNV,nonsynonymous SNV	2q24.1	activin A receptor type 1	protein-coding	1	1	0	0	0	0	0	0	0	0	0	0	1	0	0	0	0	0	0	0	0	0	1
51092	SIDT2	ASD ID/DD	2	synonymous SNV,stopgain	11q23.3	SID1 transmembrane family member 2	protein-coding	0	0	0	0	0	0	0	1	0	0	0	0	0	0	0	0	0	0	0	0	0	0	0
25942	SIN3A	ASD ID/DD	8	nonsynonymous SNV,frameshift deletion,stopgain,synonymous SNV	15q24.2	SIN3 transcription regulator family member A	protein-coding	0	1	0	0	0	0	0	0	0	0	0	0	0	0	0	0	0	1	1	1	1	0	1
23332	CLASP1	ASD ID/DD	4	nonsynonymous SNV	2q14.2-q14.3	cytoplasmic linker associated protein 1	protein-coding	0	0	0	0	0	1	1	1	0	0	0	0	0	0	0	0	0	1	0	0	0	0	1
84960	CCDC183	ASD ID/DD	3	nonsynonymous SNV,stopgain	9q34.3	coiled-coil domain containing 183	protein-coding	0	0	0	0	0	0	0	0	0	0	0	0	0	0	0	0	0	0	0	0	0	0	0
23067	SETD1B	ASD ID/DD	7	nonframeshift deletion,nonsynonymous SNV,frameshift insertion	12q24.31	SET domain containing 1B	protein-coding	0	0	0	0	0	0	0	0	0	0	0	0	0	0	0	0	0	0	0	0	1	0	0
7145	TNS1	ASD ID/DD	2	synonymous SNV,nonsynonymous SNV	2q35	tensin 1	protein-coding	0	0	0	0	0	0	0	0	0	0	0	0	1	0	0	0	0	0	0	0	0	0	1
6498	SKIL	ASD ID/DD	3	nonsynonymous SNV,synonymous SNV	3q26.2	SKI like proto-oncogene	protein-coding	1	1	0	0	0	0	0	0	0	0	0	0	0	0	0	0	0	0	0	0	0	0	0
84301	DDI2	ASD ID/DD	2	synonymous SNV,nonsynonymous SNV	1p36.21	DNA damage inducible 1 homolog 2	protein-coding	0	0	0	0	0	0	0	0	0	0	0	0	0	0	0	0	0	0	0	0	0	0	1
26057	ANKRD17	ASD ID/DD	6	nonframeshift deletion,nonsynonymous SNV,synonymous SNV	4q13.3	ankyrin repeat domain 17	protein-coding	1	1	0	0	0	0	1	0	0	0	0	0	0	0	0	0	0	0	0	0	1	0	1
440435	GPR179	ASD ID/DD	3	nonsynonymous SNV	17q12	G protein-coupled receptor 179	protein-coding	0	0	0	0	0	0	0	0	0	0	0	0	0	0	0	0	0	0	1	0	0	0	0
2122	MECOM	ASD ID/DD	3	nonsynonymous SNV	3q26.2	MDS1 and EVI1 complex locus	protein-coding	0	1	1	0	0	0	0	0	0	0	0	0	0	0	0	0	1	0	0	0	0	0	1
10137	RBM12	ASD ID/DD	4	synonymous SNV,nonsynonymous SNV	20q11.22	RNA binding motif protein 12	protein-coding	1	0	0	0	0	0	0	0	0	0	0	0	0	0	0	0	0	0	0	0	0	0	0
8777	MPDZ	ASD ID/DD	5	nonsynonymous SNV,synonymous SNV,frameshift insertion	9p23	multiple PDZ domain crumbs cell polarity complex component	protein-coding	0	0	0	0	0	0	0	0	0	0	0	0	0	0	0	0	0	0	0	0	0	0	0
1936	EEF1D	ASD ID/DD	3	nonsynonymous SNV	8q24.3	eukaryotic translation elongation factor 1 delta	protein-coding	0	0	0	0	0	0	0	0	0	0	0	0	0	0	0	0	0	0	0	0	0	0	0
84725	PLEKHA8	ASD ID/DD	3	nonsynonymous SNV	7p14.3	pleckstrin homology domain containing A8	protein-coding	0	0	0	0	0	0	0	0	0	0	0	0	0	0	0	0	0	0	0	0	0	0	0
26999	CYFIP2	ASD ID/DD	5	nonsynonymous SNV,synonymous SNV	5q33.3	cytoplasmic FMR1 interacting protein 2	protein-coding	0	0	0	0	0	0	1	0	1	0	0	0	1	0	0	1	0	0	0	0	0	0	1
80344	DCAF11	ASD ID/DD	2	nonsynonymous SNV	14q12	DDB1 and CUL4 associated factor 11	protein-coding	1	0	0	0	0	0	0	0	0	0	0	0	0	0	0	0	0	0	0	0	0	0	0
1788	DNMT3A	ASD ID/DD	11	nonsynonymous SNV,frameshift insertion,nonframeshift deletion,stopgain	2p23.3	DNA methyltransferase 3 alpha	protein-coding	0	1	0	0	0	0	0	0	0	0	0	0	0	0	0	0	1	1	1	0	0	0	0
23451	SF3B1	ASD ID/DD	5	nonsynonymous SNV	2q33.1	splicing factor 3b subunit 1	protein-coding	1	1	0	1	0	0	0	1	0	0	0	0	0	0	0	0	0	1	0	0	1	0	1
55636	CHD7	ASD ID/DD	10	nonsynonymous SNV,nonframeshift deletion,stopgain,synonymous SNV	8q12.2	chromodomain helicase DNA binding protein 7	protein-coding	0	1	0	0	0	0	0	0	0	0	0	0	1	0	1	0	1	0	1	0	1	0	1
11153	FICD	ASD ID/DD	2	nonsynonymous SNV	12q23.3	FIC domain containing	protein-coding	1	0	0	0	0	0	0	0	0	0	0	0	0	0	0	0	0	0	0	0	0	0	0
9698	PUM1	ASD ID/DD	2	nonsynonymous SNV,frameshift insertion	1p35.2	pumilio RNA binding family member 1	protein-coding	1	0	0	0	0	0	1	0	0	0	0	0	0	0	0	0	0	1	0	0	0	0	1
125058	TBC1D16	ASD ID/DD	2	synonymous SNV	17q25.3	TBC1 domain family member 16	protein-coding	0	0	0	0	0	0	0	0	0	0	0	0	0	0	0	0	0	0	0	0	0	0	0
10721	POLQ	ASD ID/DD	6	nonsynonymous SNV,synonymous SNV	3q13.33	DNA polymerase theta	protein-coding	0	0	0	0	0	0	0	0	0	0	0	0	0	0	0	0	0	1	0	0	0	0	0
23040	MYT1L	ASD ID/DD	11	nonsynonymous SNV,stopgain,synonymous SNV,frameshift deletion,splice-site mutation	2p25.3	myelin transcription factor 1 like	protein-coding	0	0	1	0	0	0	1	0	0	0	0	0	0	0	0	0	0	0	1	0	1	1	1
10594	PRPF8	ASD ID/DD	5	nonsynonymous SNV	17p13.3	pre-mRNA processing factor 8	protein-coding	1	0	0	0	0	0	1	0	0	0	0	0	0	0	0	0	0	1	0	0	0	0	1
5118	PCOLCE	ASD ID/DD	2	frameshift deletion,nonsynonymous SNV	7q22.1	procollagen C-endopeptidase enhancer	protein-coding	0	0	0	0	0	0	0	0	0	0	0	0	0	0	0	0	0	0	0	0	0	0	0
4292	MLH1	ASD ID/DD	3	nonsynonymous SNV	3p22.2	mutL homolog 1	protein-coding	1	1	0	0	0	0	0	0	0	0	0	0	0	0	0	0	0	1	0	0	1	0	0
8518	ELP1	ASD ID/DD	2	nonsynonymous SNV	9q31.3	elongator complex protein 1	protein-coding	0	1	0	0	0	0	0	0	0	0	0	0	0	0	0	0	0	0	0	0	0	0	0
375612	LHFPL3	ASD ID/DD	2	nonsynonymous SNV	7q22.2-q22.3	LHFPL tetraspan subfamily member 3	protein-coding	0	0	0	0	0	0	0	0	0	0	0	0	0	0	0	0	0	0	0	0	0	0	0
199713	NLRP7	ASD ID/DD	3	nonsynonymous SNV,frameshift insertion	19q13.42	NLR family pyrin domain containing 7	protein-coding	0	0	0	0	0	0	0	0	0	0	0	0	0	0	0	0	0	0	0	0	0	0	0
6493	SIM2	ASD ID/DD	2	synonymous SNV,nonframeshift insertion	21q22.13	single-minded family bHLH transcription factor 2	protein-coding	0	1	0	0	0	0	0	0	0	0	0	0	0	0	0	0	0	0	0	0	0	0	0
341640	FREM2	ASD ID/DD	2	nonsynonymous SNV	13q13.3	FRAS1 related extracellular matrix protein 2	protein-coding	0	1	0	0	1	0	0	0	0	0	0	0	0	0	0	0	0	0	1	0	0	0	0
23185	LARP4B	ASD ID/DD	3	stopgain,splice-site mutation	10p15.3	La ribonucleoprotein domain family member 4B	protein-coding	0	0	0	0	0	0	0	0	0	0	0	0	0	0	0	0	0	0	0	0	1	0	1
777	CACNA1E	ASD ID/DD	13	nonsynonymous SNV,synonymous SNV,splice-site mutation	1q25.3	calcium voltage-gated channel subunit alpha1 E	protein-coding	0	0	0	0	0	0	1	0	1	0	0	0	1	0	0	1	0	0	0	0	1	0	1
55667	DENND4C	ASD ID/DD	2	nonsynonymous SNV	9p22.1	DENN domain containing 4C	protein-coding	0	0	0	0	0	0	0	0	0	0	0	0	0	0	0	0	0	1	0	0	0	0	0
80832	APOL4	ASD ID/DD	2	unknown	22q12.3	apolipoprotein L4	protein-coding	0	0	0	0	0	0	0	0	0	0	0	0	0	0	0	0	0	0	0	0	0	0	0
183	AGT	ASD ID/DD	3	nonsynonymous SNV	1q42.2	angiotensinogen	protein-coding	0	1	0	0	0	0	0	0	0	0	0	0	1	0	0	0	0	0	0	0	0	0	0
11093	ADAMTS13	ASD ID/DD	2	synonymous SNV,nonsynonymous SNV	9q34.2	ADAM metallopeptidase with thrombospondin type 1 motif 13	protein-coding	0	0	0	0	0	0	0	0	0	0	0	0	0	0	0	0	0	0	0	0	0	0	0
4598	MVK	ASD ID/DD	2	nonsynonymous SNV,frameshift insertion	12q24.11	mevalonate kinase	protein-coding	0	0	0	0	0	0	0	0	0	0	0	0	0	0	0	0	0	0	0	0	0	0	0
22807	IKZF2	ASD ID/DD	2	nonsynonymous SNV,synonymous SNV	2q34	IKAROS family zinc finger 2	protein-coding	0	1	1	0	0	0	0	0	0	0	0	0	0	0	0	0	0	0	0	0	0	0	1
387119	CEP85L	ASD ID/DD	5	synonymous SNV,nonsynonymous SNV,stopgain	6q22.31	centrosomal protein 85 like	protein-coding	0	0	0	0	0	0	0	0	0	0	0	0	0	0	0	0	0	0	0	0	0	0	0
56927	GPR108	ASD ID/DD	4	synonymous SNV,nonsynonymous SNV	19p13.3	G protein-coupled receptor 108	protein-coding	1	0	0	0	0	0	0	0	0	0	0	0	0	0	0	0	0	0	0	0	0	0	0
374378	GALNT18	ASD ID/DD	4	frameshift deletion,nonsynonymous SNV,nonframeshift substitution	11p15.4	polypeptide N-acetylgalactosaminyltransferase 18	protein-coding	0	0	0	0	0	0	0	0	0	0	0	0	0	0	0	0	0	0	0	0	0	0	0
79803	HPS6	ASD ID/DD	2	nonsynonymous SNV,nonframeshift insertion	10q24.32	HPS6, biogenesis of lysosomal organelles complex 2 subunit 3	protein-coding	1	0	0	0	0	0	0	0	0	0	0	0	0	0	0	0	0	0	0	0	0	0	0
206338	LVRN	ASD ID/DD	2	nonsynonymous SNV	5q23.1	laeverin	protein-coding	0	0	0	0	0	0	0	0	0	0	0	0	0	0	0	0	0	0	0	0	0	0	0
22905	EPN2	ASD ID/DD	2	nonsynonymous SNV	17p11.2	epsin 2	protein-coding	0	0	0	0	0	0	0	1	1	0	0	0	0	0	0	0	0	0	0	0	0	0	0
1213	CLTC	ASD ID/DD	8	synonymous SNV,nonsynonymous SNV,stopgain,nonframeshift deletion	17q23.1	clathrin heavy chain	protein-coding	1	0	0	0	0	0	1	1	1	0	0	0	0	0	0	1	0	0	1	0	0	0	1
81	ACTN4	ASD ID/DD	3	nonsynonymous SNV,synonymous SNV	19q13.2	actinin alpha 4	protein-coding	0	1	0	0	0	1	0	0	1	1	0	0	0	0	0	0	0	0	0	0	0	0	1
55313	CPPED1	ASD ID/DD	2	nonsynonymous SNV	16p13.12	calcineurin like phosphoesterase domain containing 1	protein-coding	0	0	0	0	0	0	0	0	0	0	0	0	0	0	0	0	0	0	0	0	0	0	0
6323	SCN1A	ASD ID/DD	4	nonsynonymous SNV	2q24.3	sodium voltage-gated channel alpha subunit 1	protein-coding	0	1	0	0	0	0	0	0	0	0	0	0	1	0	1	0	0	0	1	1	1	0	1
219578	ZNF804B	ASD ID/DD	4	nonsynonymous SNV,synonymous SNV	7q21.13	zinc finger protein 804B	protein-coding	0	0	0	0	0	0	0	0	0	0	0	0	0	0	0	0	0	0	0	0	0	0	0
11133	KPTN	ASD ID/DD	2	synonymous SNV	19q13.32	kaptin, actin binding protein	protein-coding	0	0	0	0	0	0	0	0	0	0	0	0	0	0	0	0	0	0	1	0	0	0	0
80034	CSRNP3	ASD ID/DD	2	synonymous SNV,nonsynonymous SNV	2q24.3	cysteine and serine rich nuclear protein 3	protein-coding	0	0	0	0	0	0	0	0	0	0	0	0	0	0	0	0	0	1	0	0	0	0	0
64425	POLR1E	ASD ID/DD	2	nonsynonymous SNV,frameshift deletion	9p13.2	RNA polymerase I subunit E	protein-coding	1	0	0	0	0	0	0	0	0	0	0	0	0	0	0	0	0	1	0	0	0	0	0
55728	N4BP2	ASD ID/DD	3	nonsynonymous SNV,synonymous SNV,frameshift substitution	4p14	NEDD4 binding protein 2	protein-coding	0	0	0	0	0	0	0	0	0	0	0	0	0	0	0	0	0	1	0	0	0	0	0
23286	WWC1	ASD ID/DD	2	nonsynonymous SNV	5q34	WW and C2 domain containing 1	protein-coding	0	0	0	0	0	0	1	0	0	0	0	0	1	1	0	0	0	0	0	0	0	0	0
130026	ICA1L	ASD ID/DD	2	nonsynonymous SNV	2q33.2	islet cell autoantigen 1 like	protein-coding	0	0	0	0	0	0	0	0	0	0	0	0	0	0	0	0	0	0	0	0	0	0	0
5286	PIK3C2A	ASD ID/DD	3	nonsynonymous SNV,synonymous SNV	11p15.1	phosphatidylinositol-4-phosphate 3-kinase catalytic subunit type 2 alpha	protein-coding	0	0	0	0	0	0	0	0	0	0	0	0	0	0	0	0	0	0	0	0	0	0	0
221092	HNRNPUL2	ASD ID/DD	2	nonsynonymous SNV,synonymous SNV	11q12.3	heterogeneous nuclear ribonucleoprotein U like 2	protein-coding	1	0	0	0	0	0	0	0	0	0	0	0	0	0	0	0	0	0	0	0	0	0	1
9656	MDC1	ASD ID/DD	3	nonsynonymous SNV,synonymous SNV	6p21.33	mediator of DNA damage checkpoint 1	protein-coding	1	0	0	0	0	0	0	0	0	0	0	0	0	0	0	0	0	0	0	0	0	0	0
1105	CHD1	ASD ID/DD	6	nonsynonymous SNV,synonymous SNV,frameshift insertion	5q15-q21.1	chromodomain helicase DNA binding protein 1	protein-coding	0	0	0	0	0	0	0	0	0	0	0	0	0	0	0	0	1	1	0	1	0	0	1
57617	VPS18	ASD ID/DD	2	nonsynonymous SNV	15q15.1	VPS18, CORVET/HOPS core subunit	protein-coding	1	0	0	0	0	0	0	0	0	0	0	0	0	0	0	0	0	0	0	0	0	0	1
51111	KMT5B	ASD ID/DD	8	nonsynonymous SNV,splice-site mutation,frameshift deletion,stopgain,frameshift insertion	11q13.2	lysine methyltransferase 5B	protein-coding	1	1	0	0	0	0	0	0	0	0	0	0	0	0	0	0	0	0	1	0	1	1	1
285527	FRYL	ASD ID/DD	4	nonsynonymous SNV,splice-site mutation,stopgain	4p11	FRY like transcription coactivator	protein-coding	0	0	0	0	0	0	0	0	0	0	0	0	0	0	0	0	0	0	0	0	0	0	1
25903	OLFML2B	ASD ID/DD	2	nonsynonymous SNV,stopgain	1q23.3	olfactomedin like 2B	protein-coding	0	0	0	0	0	0	0	0	0	0	0	0	0	0	0	0	0	0	0	0	0	0	0
5914	RARA	ASD ID/DD	2	nonsynonymous SNV	17q21.2	retinoic acid receptor alpha	protein-coding	0	1	1	0	0	0	0	0	0	0	0	0	0	0	0	0	0	0	0	0	0	0	1
2554	GABRA1	ASD ID/DD	3	nonsynonymous SNV	5q34	gamma-aminobutyric acid type A receptor alpha1 subunit	protein-coding	0	1	0	0	0	0	0	0	1	0	0	0	1	0	0	0	0	0	1	0	0	0	1
79726	WDR59	ASD ID/DD	2	nonsynonymous SNV	16q23.1	WD repeat domain 59	protein-coding	1	0	0	0	0	0	0	0	0	0	0	0	0	0	0	0	0	0	0	0	0	0	0
7399	USH2A	ASD ID/DD	5	nonsynonymous SNV,synonymous SNV,frameshift deletion	1q41	usherin	protein-coding	0	0	0	0	1	0	0	1	0	0	0	0	0	0	0	0	0	0	0	0	0	0	0
2138	EYA1	ASD ID/DD	3	nonsynonymous SNV,frameshift deletion,synonymous SNV	8q13.3	EYA transcriptional coactivator and phosphatase 1	protein-coding	0	1	0	0	0	0	0	0	0	0	0	0	1	0	0	0	0	0	1	0	0	0	1
26523	AGO1	ASD ID/DD	5	nonsynonymous SNV	1p34.3	argonaute 1, RISC catalytic component	protein-coding	0	0	0	0	0	0	1	0	0	0	0	0	0	0	0	0	0	0	0	0	0	0	1
23161	SNX13	ASD ID/DD	2	nonsynonymous SNV	7p21.1	sorting nexin 13	protein-coding	1	1	0	0	0	0	0	0	0	0	0	0	0	0	0	0	0	0	0	0	0	0	1
1917	EEF1A2	ASD ID/DD	11	nonsynonymous SNV,synonymous SNV	20q13.33	eukaryotic translation elongation factor 1 alpha 2	protein-coding	0	0	0	0	0	0	1	0	1	0	0	0	1	0	0	0	0	0	0	0	0	0	1
389114	ZNF662	ASD ID/DD	3	synonymous SNV,nonsynonymous SNV	3p22.1	zinc finger protein 662	protein-coding	0	0	1	0	0	0	0	0	0	0	0	0	0	0	0	0	0	0	0	0	0	0	0
473	RERE	ASD ID/DD	5	nonsynonymous SNV,stopgain	1p36.23	arginine-glutamic acid dipeptide repeats	protein-coding	0	1	1	0	0	0	1	0	0	0	0	0	0	0	0	0	0	0	1	1	0	0	1
6261	RYR1	ASD ID/DD	8	nonsynonymous SNV,synonymous SNV	19q13.2	ryanodine receptor 1	protein-coding	0	1	0	0	0	0	0	1	0	0	0	0	1	0	0	0	0	0	1	0	0	0	0
80155	NAA15	ASD ID/DD	4	nonsynonymous SNV,stopgain,frameshift deletion	4q31.1	N(alpha)-acetyltransferase 15, NatA auxiliary subunit	protein-coding	1	0	0	0	0	0	0	0	0	0	0	0	0	0	0	0	0	1	1	0	1	1	1
1408	CRY2	ASD ID/DD	2	nonsynonymous SNV	11p11.2	cryptochrome circadian regulator 2	protein-coding	1	0	0	0	0	0	0	0	0	0	0	0	1	0	0	0	0	0	0	0	0	0	1
6331	SCN5A	ASD ID/DD	2	nonsynonymous SNV,synonymous SNV	3p22.2	sodium voltage-gated channel alpha subunit 5	protein-coding	0	1	0	0	0	0	0	0	0	0	0	0	1	0	0	0	0	0	0	0	0	0	1
5428	POLG	ASD ID/DD	2	nonframeshift deletion,nonsynonymous SNV	15q26.1	DNA polymerase gamma, catalytic subunit	protein-coding	1	1	0	0	0	0	0	0	0	0	0	0	0	0	0	0	0	0	0	0	0	0	0
10743	RAI1	ASD ID/DD	8	nonsynonymous SNV,frameshift deletion,stopgain,synonymous SNV	17p11.2	retinoic acid induced 1	protein-coding	0	1	0	0	0	0	0	0	0	0	0	0	0	0	0	0	1	0	1	0	1	0	1
2290	FOXG1	ASD ID/DD	16	nonsynonymous SNV,synonymous SNV,frameshift insertion,stopgain,frameshift deletion	14q12	forkhead box G1	protein-coding	0	1	1	0	0	0	0	0	0	0	0	0	1	0	0	0	0	0	1	0	0	0	0
163882	CNST	ASD ID/DD	3	nonsynonymous SNV,synonymous SNV,stopgain	1q44	consortin, connexin sorting protein	protein-coding	1	0	0	0	0	0	0	0	0	0	0	0	0	0	0	0	0	0	0	0	0	0	1
3786	KCNQ3	ASD ID/DD	7	nonsynonymous SNV	8q24.22	potassium voltage-gated channel subfamily Q member 3	protein-coding	0	1	0	0	0	0	1	0	0	0	0	0	1	0	1	0	0	0	0	0	0	0	1
84159	ARID5B	ASD ID/DD	2	frameshift insertion,frameshift deletion	10q21.2	AT-rich interaction domain 5B	protein-coding	0	1	0	0	0	0	0	0	0	0	0	0	1	0	0	0	0	0	0	0	1	0	1
1000	CDH2	ASD ID/DD	2	synonymous SNV,nonsynonymous SNV	18q12.1	cadherin 2	protein-coding	0	1	0	0	1	0	0	0	1	0	1	0	0	0	0	0	0	1	0	0	0	0	0
43	ACHE	ASD ID/DD	5	nonsynonymous SNV,synonymous SNV	7q22.1	acetylcholinesterase (Cartwright blood group)	protein-coding	0	1	0	0	0	0	0	0	0	0	0	0	1	0	0	0	0	0	0	0	1	0	1
79893	GGNBP2	ASD ID/DD	3	stopgain,nonsynonymous SNV	17q12	gametogenetin binding protein 2	protein-coding	1	0	0	0	0	0	0	0	0	0	0	0	0	0	0	0	0	0	0	0	0	0	1
288	ANK3	ASD ID/DD	9	nonsynonymous SNV,synonymous SNV	10q21.2	ankyrin 3	protein-coding	0	0	0	0	0	0	1	0	1	0	0	0	1	0	1	0	0	0	0	0	0	0	1
22974	TPX2	ASD ID/DD	2	synonymous SNV,nonsynonymous SNV	20q11.21	TPX2, microtubule nucleation factor	protein-coding	0	0	0	0	0	0	0	0	0	0	0	0	0	0	0	0	0	1	0	0	0	0	1
54980	C2orf42	ASD ID/DD	4	nonsynonymous SNV	2p13.3	chromosome 2 open reading frame 42	protein-coding	0	0	0	0	0	0	0	0	0	0	0	0	0	0	0	0	0	0	0	0	0	0	0
26233	FBXL6	ASD ID/DD	2	nonsynonymous SNV	8q24.3	F-box and leucine rich repeat protein 6	protein-coding	1	0	0	0	0	0	0	0	0	0	0	0	0	0	0	0	0	0	0	0	0	0	0
64132	XYLT2	ASD ID/DD	2	nonsynonymous SNV	17q21.33	xylosyltransferase 2	protein-coding	1	0	0	0	0	0	0	0	0	0	0	0	0	0	0	0	0	0	1	0	0	0	0
253260	RICTOR	ASD ID/DD	2	nonsynonymous SNV,synonymous SNV	5p13.1	RPTOR independent companion of MTOR complex 2	protein-coding	0	1	0	0	0	0	0	0	0	0	0	0	0	0	0	0	0	0	0	0	0	0	1
8515	ITGA10	ASD ID/DD	4	nonsynonymous SNV,synonymous SNV	1q21.1	integrin subunit alpha 10	protein-coding	0	0	0	0	1	0	0	0	0	0	0	0	0	0	0	0	0	0	0	0	0	0	0
2118	ETV4	ASD ID/DD	3	nonsynonymous SNV,synonymous SNV	17q21.31	ETS variant 4	protein-coding	0	0	1	0	0	0	0	0	0	0	0	0	1	0	0	0	0	0	0	0	0	0	0
55023	PHIP	ASD ID/DD	10	nonsynonymous SNV,splice-site mutation,synonymous SNV,stopgain	6q14.1	pleckstrin homology domain interacting protein	protein-coding	0	1	0	0	0	0	0	0	0	0	0	0	0	0	0	0	1	1	1	0	0	1	1
5208	PFKFB2	ASD ID/DD	2	frameshift deletion,nonsynonymous SNV	1q32.1	6-phosphofructo-2-kinase/fructose-2,6-biphosphatase 2	protein-coding	0	0	0	0	0	0	0	0	0	0	0	0	0	0	0	0	0	0	0	0	0	0	0
64599	GIGYF1	ASD ID/DD	6	frameshift deletion,frameshift insertion,splice-site mutation,nonframeshift deletion,nonsynonymous SNV	7q22.1	GRB10 interacting GYF protein 1	protein-coding	0	0	0	0	0	0	0	0	0	0	0	0	0	0	0	0	0	0	0	0	0	0	1
57584	ARHGAP21	ASD ID/DD	3	nonsynonymous SNV	10p12.1|10p12.3	Rho GTPase activating protein 21	protein-coding	0	0	0	0	0	0	1	1	0	0	0	0	0	0	0	0	0	0	0	0	0	0	1
3912	LAMB1	ASD ID/DD	7	nonsynonymous SNV,splice-site mutation	7q31.1	laminin subunit beta 1	protein-coding	0	1	0	0	1	0	0	0	0	0	0	0	0	0	0	0	0	0	1	0	0	0	0
152006	RNF38	ASD ID/DD	2	splice-site mutation,nonsynonymous SNV	9p13.2	ring finger protein 38	protein-coding	0	0	0	0	0	0	0	0	0	0	0	0	0	0	0	0	0	1	0	0	0	0	1
57642	COL20A1	ASD ID/DD	3	nonsynonymous SNV,synonymous SNV	20q13.33	collagen type XX alpha 1 chain	protein-coding	0	0	0	0	0	0	0	0	0	0	0	0	0	0	0	0	0	0	0	0	0	0	0
339123	JMJD8	ASD ID/DD	2	synonymous SNV	16p13.3	jumonji domain containing 8	protein-coding	1	0	0	0	0	0	0	0	0	0	0	0	0	0	0	0	1	0	0	0	0	0	0
9138	ARHGEF1	ASD ID/DD	2	nonsynonymous SNV	19q13.2	Rho guanine nucleotide exchange factor 1	protein-coding	0	0	0	0	0	0	0	0	0	0	0	0	0	0	0	0	0	0	0	0	0	0	1
115330	GPR146	ASD ID/DD	5	nonsynonymous SNV,synonymous SNV	7p22.3	G protein-coupled receptor 146	protein-coding	0	0	0	0	0	0	0	0	0	0	0	0	0	0	0	0	0	0	0	0	0	0	0
23262	PPIP5K2	ASD ID/DD	2	nonsynonymous SNV	5q21.1	diphosphoinositol pentakisphosphate kinase 2	protein-coding	0	0	0	0	0	0	0	1	0	0	0	0	0	0	0	0	0	1	0	0	0	0	0
10847	SRCAP	ASD ID/DD	14	nonsynonymous SNV,frameshift deletion,stopgain,synonymous SNV,frameshift insertion,frameshift substitution,splice-site mutation	16p11.2	Snf2 related CREBBP activator protein	protein-coding	0	0	0	0	0	0	0	0	0	0	0	0	0	0	0	0	1	1	0	0	1	1	1
10983	CCNI	ASD ID/DD	2	nonsynonymous SNV	4q21.1	cyclin I	protein-coding	0	0	0	0	0	0	0	0	1	0	0	0	0	0	0	0	0	1	0	0	0	0	0
6543	SLC8A2	ASD ID/DD	2	nonsynonymous SNV,synonymous SNV	19q13.32	solute carrier family 8 member A2	protein-coding	0	0	0	0	0	0	1	0	1	0	0	0	1	1	0	1	0	0	0	0	0	0	0
130589	GALM	ASD ID/DD	2	synonymous SNV,frameshift deletion	2p22.1	galactose mutarotase	protein-coding	0	0	0	0	0	0	0	0	0	0	0	0	0	0	0	0	0	0	0	0	0	0	0
81850	KRTAP1-3	ASD ID/DD	3	nonsynonymous SNV,synonymous SNV	17q21.2	keratin associated protein 1-3	protein-coding	0	0	0	0	0	0	0	0	0	0	0	0	0	0	0	0	0	0	0	0	0	0	0
1993	ELAVL2	ASD ID/DD	2	frameshift deletion,nonsynonymous SNV	9p21.3	ELAV like RNA binding protein 2	protein-coding	0	0	0	1	0	0	0	1	0	0	0	0	0	0	0	0	0	0	0	0	1	0	1
1499	CTNNB1	ASD ID/DD	18	nonsynonymous SNV,synonymous SNV,frameshift deletion,stopgain	3p22.1	catenin beta 1	protein-coding	1	1	0	0	1	0	1	0	1	0	1	0	0	0	0	1	0	0	1	0	1	1	1
23316	CUX2	ASD ID/DD	4	stopgain,nonsynonymous SNV,synonymous SNV	12q24.11-q24.12	cut like homeobox 2	protein-coding	0	1	1	0	0	0	1	0	0	0	0	0	0	0	0	0	0	0	0	0	0	0	1
26005	C2CD3	ASD ID/DD	4	nonsynonymous SNV	11q13.4	C2 calcium dependent domain containing 3	protein-coding	0	1	0	0	0	0	0	0	0	0	0	0	0	0	0	0	0	1	1	0	0	0	0
54790	TET2	ASD ID/DD	4	nonsynonymous SNV,synonymous SNV	4q24	tet methylcytosine dioxygenase 2	protein-coding	0	1	0	0	0	0	0	0	0	0	0	0	0	0	0	0	1	0	0	0	0	0	0
89797	NAV2	ASD ID/DD	6	nonsynonymous SNV,synonymous SNV	11p15.1	neuron navigator 2	protein-coding	0	0	0	0	0	0	1	1	0	0	0	0	1	0	0	0	0	0	0	0	1	0	1
26036	ZNF451	ASD ID/DD	2	nonsynonymous SNV,synonymous SNV	6p12.1	zinc finger protein 451	protein-coding	0	0	1	0	0	0	0	0	1	0	0	0	0	0	0	0	1	0	0	0	0	0	0
344558	SH3RF3	ASD ID/DD	3	nonsynonymous SNV	2q13	SH3 domain containing ring finger 3	protein-coding	0	0	0	0	0	0	0	0	0	0	0	0	0	0	0	0	0	0	0	0	0	0	1
56127	PCDHB9	ASD ID/DD	3	unknown	5q31.3	protocadherin beta 9	protein-coding	0	0	0	0	1	0	0	0	0	0	0	0	0	0	0	0	0	1	0	0	0	0	0
5069	PAPPA	ASD ID/DD	2	synonymous SNV	9q33.1	pappalysin 1	protein-coding	0	0	0	0	0	0	0	0	0	0	0	0	0	0	0	0	0	0	0	0	0	0	1
23162	MAPK8IP3	ASD ID/DD	3	nonsynonymous SNV,splice-site mutation	16p13.3	mitogen-activated protein kinase 8 interacting protein 3	protein-coding	0	1	0	0	0	0	1	0	0	0	0	0	0	0	0	0	0	0	0	0	1	0	1
8621	CDK13	ASD ID/DD	14	nonsynonymous SNV,splice-site mutation	7p14.1	cyclin dependent kinase 13	protein-coding	1	0	0	0	0	0	0	0	0	0	0	0	0	0	0	0	0	0	0	0	0	0	0
7762	ZNF215	ASD ID/DD	2	nonsynonymous SNV	11p15.4	zinc finger protein 215	protein-coding	0	0	1	0	0	0	0	0	0	0	0	0	0	0	0	0	0	0	0	0	0	0	0
130733	TMEM178A	ASD ID/DD	2	nonsynonymous SNV	2p22.1	transmembrane protein 178A	protein-coding	0	0	0	0	0	0	0	0	0	0	0	0	0	0	0	0	0	0	0	0	0	0	1
5119	CHMP1A	ASD ID/DD	3	nonsynonymous SNV	16q24.3	charged multivesicular body protein 1A	protein-coding	1	0	0	0	0	0	0	0	0	0	0	0	0	0	0	0	0	0	1	0	0	0	0
55930	MYO5C	ASD ID/DD	4	nonsynonymous SNV	15q21.2	myosin VC	protein-coding	0	0	0	0	0	0	0	0	1	0	0	0	0	0	0	0	0	0	0	0	0	0	0
339559	ZFP69	ASD ID/DD	4	nonsynonymous SNV,synonymous SNV	1p34.2	ZFP69 zinc finger protein	protein-coding	0	0	1	0	0	0	0	0	0	0	0	0	0	0	0	0	0	1	0	0	0	0	0
387104	SOGA3	ASD ID/DD	2	nonsynonymous SNV	6q22.33	SOGA family member 3	protein-coding	0	0	0	0	0	0	0	0	0	0	0	0	0	0	0	0	0	1	0	0	0	0	0
6548	SLC9A1	ASD ID/DD	3	synonymous SNV,nonsynonymous SNV	1p36.11	solute carrier family 9 member A1	protein-coding	0	1	0	0	0	0	0	0	0	0	0	0	1	0	0	0	0	0	0	0	0	0	1
9646	CTR9	ASD ID/DD	5	nonsynonymous SNV,splice-site mutation,nonframeshift substitution	11p15.4	CTR9 homolog, Paf1/RNA polymerase II complex component	protein-coding	0	0	0	0	0	0	0	0	0	0	0	0	0	0	0	0	0	1	0	0	0	0	1
646	BNC1	ASD ID/DD	2	nonsynonymous SNV	15q25.2	basonuclin 1	protein-coding	0	0	1	0	0	0	0	0	0	0	0	0	0	0	0	0	0	0	0	0	0	0	0
8861	LDB1	ASD ID/DD	2	frameshift deletion	10q24.32	LIM domain binding 1	protein-coding	0	1	0	0	0	0	0	0	0	0	0	0	0	0	0	0	0	1	0	0	0	0	0
221935	SDK1	ASD ID/DD	6	nonsynonymous SNV,synonymous SNV	7p22.2	sidekick cell adhesion molecule 1	protein-coding	0	0	0	0	1	0	0	0	0	0	0	0	0	0	0	0	0	0	0	0	0	0	0
55357	TBC1D2	ASD ID/DD	2	nonsynonymous SNV	9q22.33	TBC1 domain family member 2	protein-coding	0	0	0	0	0	0	0	0	0	0	0	0	0	0	0	0	0	0	0	0	0	0	0
80204	FBXO11	ASD ID/DD	9	frameshift deletion,nonsynonymous SNV,splice-site mutation,stopgain	2p16.3	F-box protein 11	protein-coding	1	1	0	0	0	0	0	0	0	0	0	0	1	0	0	0	0	1	0	0	0	0	1
57683	ZDBF2	ASD ID/DD	5	nonsynonymous SNV,stopgain	2q33.3	zinc finger DBF-type containing 2	protein-coding	0	0	0	0	0	0	0	0	0	0	0	0	0	0	0	0	0	0	0	0	0	0	0
84231	TRAF7	ASD ID/DD	5	nonsynonymous SNV,stopgain	16p13.3	TNF receptor associated factor 7	protein-coding	1	0	0	0	0	0	0	0	0	0	0	0	0	0	0	0	0	1	0	0	0	0	0
114883	OSBPL9	ASD ID/DD	2	nonsynonymous SNV	1p32.3	oxysterol binding protein like 9	protein-coding	1	0	0	0	0	0	0	1	0	0	0	0	0	0	0	0	0	0	0	0	0	0	1
26015	RPAP1	ASD ID/DD	4	splice-site mutation,nonsynonymous SNV,synonymous SNV	15q15.1	RNA polymerase II associated protein 1	protein-coding	0	0	0	0	0	0	0	0	0	0	0	0	0	0	0	0	0	0	0	0	0	0	0
4854	NOTCH3	ASD ID/DD	4	nonsynonymous SNV	19p13.12	notch 3	protein-coding	0	0	0	0	0	0	0	0	0	0	0	0	1	0	0	0	0	0	0	0	0	0	0
92591	ASB16	ASD ID/DD	2	nonsynonymous SNV,synonymous SNV	17q21.31	ankyrin repeat and SOCS box containing 16	protein-coding	0	0	0	0	0	0	0	0	0	0	0	0	0	0	0	0	0	0	0	0	0	0	0
5184	PEPD	ASD ID/DD	2	nonsynonymous SNV	19q13.11	peptidase D	protein-coding	1	0	0	0	0	0	0	0	0	0	0	0	0	0	0	0	0	0	1	0	0	0	0
5802	PTPRS	ASD ID/DD	5	synonymous SNV,nonsynonymous SNV	19p13.3	protein tyrosine phosphatase, receptor type S	protein-coding	0	1	0	0	1	0	1	1	1	0	0	0	0	0	0	1	0	1	0	0	0	0	0
4089	SMAD4	ASD ID/DD	5	nonsynonymous SNV	18q21.2	SMAD family member 4	protein-coding	1	1	1	0	0	0	0	0	0	0	0	0	0	0	0	0	0	1	1	0	0	0	1
51665	ASB1	ASD ID/DD	2	nonsynonymous SNV,synonymous SNV	2q37.3	ankyrin repeat and SOCS box containing 1	protein-coding	1	0	0	0	0	0	0	0	0	0	0	0	0	0	0	0	0	0	0	0	0	0	0
57535	KIAA1324	ASD ID/DD	3	nonsynonymous SNV	1p13.3	KIAA1324	protein-coding	0	0	0	0	0	0	0	0	0	0	0	0	0	0	0	0	0	0	0	0	0	0	0
8532	CPZ	ASD ID/DD	3	nonsynonymous SNV	4p16.1	carboxypeptidase Z	protein-coding	0	0	0	0	0	0	0	0	0	0	0	0	0	0	0	0	0	0	0	0	0	0	0
64151	NCAPG	ASD ID/DD	2	synonymous SNV,nonsynonymous SNV	4p15.31	non-SMC condensin I complex subunit G	protein-coding	0	0	0	0	0	0	0	0	0	0	0	0	0	0	0	0	0	1	0	0	0	0	0
27086	FOXP1	ASD ID/DD	16	frameshift insertion,stopgain,nonsynonymous SNV,splice-site mutation	3p13	forkhead box P1	protein-coding	0	1	1	0	0	0	0	0	0	0	0	0	0	0	0	0	0	0	1	1	1	1	1
10302	SNAPC5	ASD ID/DD	2	nonsynonymous SNV	15q22.31	small nuclear RNA activating complex polypeptide 5	protein-coding	1	0	0	0	0	0	0	0	0	0	0	0	0	0	0	0	0	0	0	0	0	0	0
10061	ABCF2	ASD ID/DD	2	synonymous SNV,nonsynonymous SNV	7q36.1	ATP binding cassette subfamily F member 2	protein-coding	1	0	0	0	0	0	0	0	0	0	0	0	0	0	0	0	0	0	0	0	0	0	1
286204	CRB2	ASD ID/DD	4	nonsynonymous SNV,nonframeshift insertion	9q33.3	crumbs 2, cell polarity complex component	protein-coding	0	1	0	0	0	0	0	0	0	0	0	0	0	0	0	0	0	0	1	0	0	0	0
153770	PLAC8L1	ASD ID/DD	3	nonsynonymous SNV	5q32	PLAC8 like 1	protein-coding	0	0	0	0	0	0	0	0	0	0	0	0	0	0	0	0	0	0	0	0	0	0	0
3678	ITGA5	ASD ID/DD	4	stopgain,nonsynonymous SNV,synonymous SNV	12q13.13	integrin subunit alpha 5	protein-coding	0	1	0	0	1	0	0	0	0	0	0	0	0	0	0	0	0	0	0	0	1	0	1
57453	DSCAML1	ASD ID/DD	5	splice-site mutation,synonymous SNV,nonsynonymous SNV	11q23.3	DS cell adhesion molecule like 1	protein-coding	0	1	0	0	1	0	1	0	0	0	0	0	0	0	0	0	0	0	0	0	1	0	1
55125	CEP192	ASD ID/DD	3	nonsynonymous SNV	18p11.21	centrosomal protein 192	protein-coding	0	0	0	0	0	0	0	0	0	0	0	0	0	0	0	0	0	0	0	0	0	0	0
63891	RNF123	ASD ID/DD	4	nonsynonymous SNV,synonymous SNV	3p21.31	ring finger protein 123	protein-coding	0	0	0	0	0	0	0	0	0	0	0	0	0	0	0	0	0	0	0	0	0	0	1
144568	A2ML1	ASD ID/DD	3	nonsynonymous SNV,synonymous SNV	12p13.31	alpha-2-macroglobulin like 1	protein-coding	0	0	0	0	0	0	0	0	0	0	0	0	0	0	0	0	0	0	0	0	0	0	0
283849	EXOC3L1	ASD ID/DD	2	synonymous SNV,nonsynonymous SNV	16q22.1	exocyst complex component 3 like 1	protein-coding	0	0	0	0	0	0	0	0	0	0	0	0	0	0	0	0	0	0	0	0	0	0	0
1106	CHD2	ASD ID/DD	19	nonsynonymous SNV,frameshift deletion,frameshift insertion,stopgain	15q26.1	chromodomain helicase DNA binding protein 2	protein-coding	0	1	0	0	0	0	0	0	0	0	0	0	1	0	0	0	1	0	0	0	1	0	1
10472	ZBTB18	ASD ID/DD	8	synonymous SNV,frameshift deletion,frameshift insertion,nonsynonymous SNV,stopgain	1q44	zinc finger and BTB domain containing 18	protein-coding	1	1	1	0	0	0	1	0	0	0	0	0	0	0	0	0	0	0	1	0	0	0	1
152992	TRMT44	ASD ID/DD	2	nonsynonymous SNV	4p16.1	tRNA methyltransferase 44 homolog	protein-coding	0	0	0	0	0	0	0	0	0	0	0	0	0	0	0	0	0	0	0	0	0	0	0
55601	DDX60	ASD ID/DD	4	frameshift deletion,nonsynonymous SNV	4q32.3	DExD/H-box helicase 60	protein-coding	0	0	0	0	0	0	0	0	0	0	0	0	0	0	0	0	0	0	0	0	0	0	0
149428	BNIPL	ASD ID/DD	2	synonymous SNV,nonsynonymous SNV	1q21.3	BCL2 interacting protein like	protein-coding	0	0	0	0	0	0	0	0	0	0	0	0	0	0	0	0	0	0	0	0	0	0	0
2770	GNAI1	ASD ID/DD	10	nonsynonymous SNV,nonframeshift deletion	7q21.11	G protein subunit alpha i1	protein-coding	0	0	0	0	0	0	0	0	0	0	0	0	1	1	0	0	0	0	1	0	0	0	1
197342	EME2	ASD ID/DD	2	nonsynonymous SNV	16p13.3	essential meiotic structure-specific endonuclease subunit 2	protein-coding	0	0	0	0	0	0	0	0	0	0	0	0	0	0	0	0	0	0	0	0	0	0	0
25970	SH2B1	ASD ID/DD	4	frameshift insertion,nonsynonymous SNV,synonymous SNV	16p11.2	SH2B adaptor protein 1	protein-coding	0	1	0	0	0	0	0	0	0	0	0	0	0	0	0	0	0	0	0	0	0	0	1
3728	JUP	ASD ID/DD	5	nonsynonymous SNV,frameshift insertion,synonymous SNV	17q21.2	junction plakoglobin	protein-coding	0	1	0	0	1	0	0	0	1	0	0	0	0	0	0	0	0	1	0	0	0	0	0
64800	EFCAB6	ASD ID/DD	2	nonsynonymous SNV,stopgain	22q13.2-q13.31	EF-hand calcium binding domain 6	protein-coding	0	0	0	0	0	0	0	0	0	0	0	0	0	0	0	0	0	0	0	0	0	0	0
8408	ULK1	ASD ID/DD	2	nonsynonymous SNV	12q24.33	unc-51 like autophagy activating kinase 1	protein-coding	1	0	0	0	0	0	1	0	0	0	0	0	0	0	0	0	0	0	0	0	1	0	1
57419	SLC24A3	ASD ID/DD	2	nonsynonymous SNV	20p11.23	solute carrier family 24 member 3	protein-coding	0	0	0	0	0	0	0	0	0	0	0	0	0	0	0	0	0	0	0	0	0	0	1
55015	PRPF39	ASD ID/DD	2	stopgain,nonsynonymous SNV	14q21.2	pre-mRNA processing factor 39	protein-coding	0	0	0	0	0	0	0	0	0	0	0	0	0	0	0	0	0	0	0	0	0	0	1
8460	TPST1	ASD ID/DD	2	nonsynonymous SNV	7q11.21	tyrosylprotein sulfotransferase 1	protein-coding	0	0	0	0	0	0	0	0	0	0	0	0	1	0	0	0	0	0	0	0	0	0	0
1748	DLX4	ASD ID/DD	2	nonsynonymous SNV,synonymous SNV	17q21.33	distal-less homeobox 4	protein-coding	0	0	1	0	0	0	0	0	0	0	0	0	0	0	0	0	0	0	0	0	0	0	0
23108	RAP1GAP2	ASD ID/DD	2	synonymous SNV	17p13.3	RAP1 GTPase activating protein 2	protein-coding	0	0	0	0	0	0	1	0	0	0	0	0	0	0	0	0	0	0	0	0	0	0	1
164656	TMPRSS6	ASD ID/DD	2	nonsynonymous SNV	22q12.3	transmembrane protease, serine 6	protein-coding	0	1	0	0	0	0	0	0	0	0	0	0	0	0	0	0	0	0	1	0	0	0	0
8289	ARID1A	ASD ID/DD	7	synonymous SNV,nonsynonymous SNV,stopgain	1p36.11	AT-rich interaction domain 1A	protein-coding	0	1	0	0	0	0	1	0	0	0	0	0	0	0	0	0	1	1	1	0	0	0	1
4781	NFIB	ASD ID/DD	2	splice-site mutation	9p23-p22.3	nuclear factor I B	protein-coding	0	1	1	0	0	0	0	1	0	0	0	0	0	0	0	0	0	1	0	0	1	0	1
56171	DNAH7	ASD ID/DD	6	nonsynonymous SNV,synonymous SNV	2q32.3	dynein axonemal heavy chain 7	protein-coding	0	0	0	0	0	0	0	0	0	0	0	0	0	0	0	0	0	0	0	0	0	0	0
23013	SPEN	ASD ID/DD	8	nonsynonymous SNV,frameshift insertion,frameshift deletion,stopgain,synonymous SNV	1p36.21-p36.13	spen family transcriptional repressor	protein-coding	1	1	0	0	0	0	1	0	0	0	0	0	0	0	0	0	0	1	0	0	1	0	1
27443	CECR2	ASD ID/DD	2	stopgain,nonframeshift insertion	22q11.1-q11.21	CECR2, histone acetyl-lysine reader	protein-coding	0	1	0	0	0	0	0	0	0	0	0	0	0	0	0	0	0	0	0	0	0	0	0
130507	UBR3	ASD ID/DD	5	frameshift deletion,nonframeshift deletion,synonymous SNV,stopgain	2q31.1	ubiquitin protein ligase E3 component n-recognin 3 (putative)	protein-coding	0	1	0	0	0	0	1	0	0	0	0	0	1	0	0	0	0	0	0	0	0	0	1
200008	CDCP2	ASD ID/DD	2	nonsynonymous SNV,synonymous SNV	1p32.3	CUB domain containing protein 2	protein-coding	0	0	0	0	0	0	0	0	0	0	0	0	0	0	0	0	0	0	0	0	0	0	0
79867	TCTN2	ASD ID/DD	2	nonsynonymous SNV	12q24.31	tectonic family member 2	protein-coding	0	0	0	0	0	0	0	0	0	0	0	0	0	0	0	0	0	0	1	0	0	0	0
171389	NLRP6	ASD ID/DD	2	nonsynonymous SNV	11p15.5	NLR family pyrin domain containing 6	protein-coding	0	0	0	0	0	0	0	0	0	0	0	0	1	0	0	0	0	0	0	0	0	0	0
9663	LPIN2	ASD ID/DD	2	nonsynonymous SNV	18p11.31	lipin 2	protein-coding	0	0	0	0	0	0	1	0	0	0	0	0	0	0	0	0	0	0	0	0	0	0	0
6547	SLC8A3	ASD ID/DD	2	synonymous SNV,nonsynonymous SNV	14q24.2	solute carrier family 8 member A3	protein-coding	0	0	0	0	0	0	0	0	0	0	0	0	1	0	0	0	0	0	0	0	0	0	0
220323	OAF	ASD ID/DD	2	nonsynonymous SNV	11q23.3	out at first homolog	protein-coding	0	0	0	0	0	0	0	0	0	0	0	0	0	0	0	0	0	0	0	0	0	0	0
3710	ITPR3	ASD ID/DD	3	nonsynonymous SNV,synonymous SNV	6p21.31	inositol 1,4,5-trisphosphate receptor type 3	protein-coding	0	0	0	0	0	0	0	0	0	0	0	0	0	0	0	0	0	0	0	0	0	0	0
151613	TTC14	ASD ID/DD	3	nonsynonymous SNV,synonymous SNV	3q26.33	tetratricopeptide repeat domain 14	protein-coding	0	0	0	0	0	0	0	0	0	0	0	0	0	0	0	0	0	0	0	0	0	0	0
493860	CCDC73	ASD ID/DD	2	synonymous SNV,nonsynonymous SNV	11p13	coiled-coil domain containing 73	protein-coding	0	0	0	0	0	0	0	0	0	0	0	0	0	0	0	0	0	0	0	0	0	0	0
55139	ANKZF1	ASD ID/DD	2	synonymous SNV,nonsynonymous SNV	2q35	ankyrin repeat and zinc finger domain containing 1	protein-coding	0	0	0	0	0	0	0	0	0	0	0	0	0	0	0	0	0	0	0	0	0	0	0
112398	EGLN2	ASD ID/DD	5	nonsynonymous SNV	19q13.2	egl-9 family hypoxia inducible factor 2	protein-coding	1	0	0	0	0	0	0	0	0	0	0	0	0	0	0	0	0	0	0	0	0	0	0
54487	DGCR8	ASD ID/DD	2	synonymous SNV,nonsynonymous SNV	22q11.21	DGCR8, microprocessor complex subunit	protein-coding	0	1	0	0	0	0	0	0	0	0	0	0	1	1	0	0	0	1	0	0	0	0	1
2074	ERCC6	ASD ID/DD	3	nonsynonymous SNV	10q11.23	ERCC excision repair 6, chromatin remodeling factor	protein-coding	0	0	0	0	0	0	0	0	0	0	0	0	1	0	0	0	1	0	1	0	0	0	0
1636	ACE	ASD ID/DD	2	nonsynonymous SNV,synonymous SNV	17q23.3	angiotensin I converting enzyme	protein-coding	0	1	0	0	0	0	0	0	0	0	0	0	1	0	0	0	0	0	0	0	0	0	0
79872	CBLL1	ASD ID/DD	2	nonsynonymous SNV,synonymous SNV	7q22.3	Cbl proto-oncogene like 1	protein-coding	0	0	0	0	0	0	0	0	0	0	0	0	0	0	0	0	0	1	0	0	0	0	1
51439	FAM8A1	ASD ID/DD	3	stopgain,nonsynonymous SNV	6p22.3	family with sequence similarity 8 member A1	protein-coding	1	0	0	0	0	0	0	0	0	0	0	0	0	0	0	0	0	0	0	0	0	0	0
120776	OR2D2	ASD ID/DD	2	synonymous SNV,nonsynonymous SNV	11p15.4	olfactory receptor family 2 subfamily D member 2	protein-coding	0	0	0	0	0	0	0	0	0	0	0	0	0	0	0	0	0	0	0	0	0	0	0
23347	SMCHD1	ASD ID/DD	5	nonsynonymous SNV,synonymous SNV	18p11.32	structural maintenance of chromosomes flexible hinge domain containing 1	protein-coding	0	1	0	0	0	0	0	0	0	0	0	0	0	0	0	0	0	1	0	0	1	0	1
2956	MSH6	ASD ID/DD	2	nonsynonymous SNV	2p16.3	mutS homolog 6	protein-coding	1	0	0	0	0	0	0	0	0	0	0	0	0	0	0	0	0	1	0	0	0	0	0
90342	FER1L5	ASD ID/DD	2	stopgain,synonymous SNV	2q11.2	fer-1 like family member 5	protein-coding	0	0	0	0	0	0	0	0	0	0	0	0	0	0	0	0	0	0	0	0	0	0	0
9439	MED23	ASD ID/DD	2	nonsynonymous SNV	6q23.2	mediator complex subunit 23	protein-coding	0	0	0	0	0	0	0	0	0	0	0	0	0	0	0	0	0	1	0	0	0	0	0
54914	FOCAD	ASD ID/DD	2	nonsynonymous SNV,stopgain	9p21.3	focadhesin	protein-coding	0	0	0	0	0	0	0	0	0	0	0	0	0	0	0	0	0	0	0	0	0	0	0
4014	LOR	ASD ID/DD	2	nonframeshift deletion,synonymous SNV	1q21.3	loricrin	protein-coding	0	0	0	0	0	0	0	0	0	0	0	0	0	0	0	0	0	0	0	0	0	0	0
84952	CGNL1	ASD ID/DD	4	nonsynonymous SNV,synonymous SNV	15q21.3	cingulin like 1	protein-coding	0	0	0	0	0	0	0	0	0	0	0	0	0	0	0	0	0	0	0	0	0	0	0
7015	TERT	ASD ID/DD	4	nonsynonymous SNV,synonymous SNV	5p15.33	telomerase reverse transcriptase	protein-coding	0	0	0	0	0	0	0	0	0	0	0	0	0	0	0	0	0	0	0	0	0	0	0
6840	SVIL	ASD ID/DD	5	stopgain,synonymous SNV,nonsynonymous SNV	10p11.23	supervillin	protein-coding	0	0	0	0	0	0	0	0	0	0	0	0	0	0	0	0	0	1	0	0	0	0	1
23367	LARP1	ASD ID/DD	2	nonsynonymous SNV	5q33.2	La ribonucleoprotein domain family member 1	protein-coding	1	0	0	0	0	0	0	0	0	0	0	0	0	0	0	0	0	0	0	0	0	0	1
7994	KAT6A	ASD ID/DD	14	frameshift deletion,nonsynonymous SNV,stopgain,frameshift insertion	8p11.21	lysine acetyltransferase 6A	protein-coding	0	1	0	0	0	0	1	0	0	0	0	0	1	0	0	0	1	1	1	1	1	0	1
23649	POLA2	ASD ID/DD	2	nonsynonymous SNV	11q13.1	DNA polymerase alpha 2, accessory subunit	protein-coding	0	0	0	0	0	0	0	0	0	0	0	0	0	0	0	0	0	1	0	0	0	0	0
22993	HMGXB3	ASD ID/DD	2	nonsynonymous SNV	5q32	HMG-box containing 3	protein-coding	1	0	0	0	0	0	1	0	0	0	0	0	0	0	0	0	0	0	0	0	0	0	0
7455	ZAN	ASD ID/DD	3	unknown	7q22.1	zonadhesin (gene/pseudogene)	protein-coding	0	0	0	0	0	0	0	0	0	0	0	0	0	0	0	0	0	0	0	0	0	0	0
10595	ERN2	ASD ID/DD	2	nonsynonymous SNV,synonymous SNV	16p12.2	endoplasmic reticulum to nucleus signaling 2	protein-coding	0	0	0	0	0	0	0	0	0	0	0	0	0	0	0	0	0	0	0	0	0	0	0
23031	MAST3	ASD ID/DD	3	nonsynonymous SNV,synonymous SNV	19p13.11	microtubule associated serine/threonine kinase 3	protein-coding	0	0	0	0	0	0	0	0	0	0	0	0	0	0	0	0	0	0	0	0	0	0	1
10522	DEAF1	ASD ID/DD	7	nonsynonymous SNV,synonymous SNV	11p15.5	DEAF1, transcription factor	protein-coding	0	1	1	0	0	0	0	0	0	0	0	0	0	0	0	0	0	0	1	1	1	0	0
51176	LEF1	ASD ID/DD	2	nonsynonymous SNV	4q25	lymphoid enhancer binding factor 1	protein-coding	0	1	1	0	0	0	0	0	0	0	0	0	0	0	0	0	0	0	0	0	0	0	1
55621	TRMT1	ASD ID/DD	2	synonymous SNV,nonsynonymous SNV	19p13.13	tRNA methyltransferase 1	protein-coding	1	0	0	0	0	0	0	0	0	0	0	0	0	0	0	0	0	0	0	0	0	0	0
23378	RRP8	ASD ID/DD	4	nonsynonymous SNV,synonymous SNV	11p15.4	ribosomal RNA processing 8	protein-coding	1	0	0	0	0	0	0	0	0	0	0	0	0	0	0	0	0	0	0	0	0	0	0
51317	PHF21A	ASD ID/DD	2	frameshift deletion	11p11.2	PHD finger protein 21A	protein-coding	0	1	0	0	0	0	0	1	0	0	0	0	1	0	0	0	1	0	1	0	1	0	1
50512	PODXL2	ASD ID/DD	2	synonymous SNV,nonsynonymous SNV	3q21.3	podocalyxin like 2	protein-coding	0	0	0	0	1	0	0	0	0	0	0	0	0	0	0	0	0	1	0	0	0	0	1
165904	XIRP1	ASD ID/DD	5	nonsynonymous SNV,synonymous SNV	3p22.2	xin actin binding repeat containing 1	protein-coding	0	0	0	0	0	0	0	0	0	0	0	0	0	0	0	0	0	0	0	0	0	0	0
9672	SDC3	ASD ID/DD	3	nonsynonymous SNV	1p35.2	syndecan 3	protein-coding	0	0	0	0	1	0	0	0	0	0	0	0	1	0	0	0	0	0	0	0	1	0	0
6857	SYT1	ASD ID/DD	4	nonsynonymous SNV	12q21.2	synaptotagmin 1	protein-coding	0	1	0	0	0	0	1	0	1	0	1	0	1	0	0	0	0	0	0	0	0	0	0
2904	GRIN2B	ASD ID/DD	13	splice-site mutation,nonsynonymous SNV	12p13.1	glutamate ionotropic receptor NMDA type subunit 2B	protein-coding	0	1	0	0	0	0	1	0	1	0	0	0	1	1	0	0	0	0	1	0	1	1	1
23504	RIMBP2	ASD ID/DD	2	frameshift deletion,nonsynonymous SNV	12q24.33	RIMS binding protein 2	protein-coding	0	0	0	0	0	0	1	0	1	0	0	0	0	0	0	1	0	0	0	0	0	0	0
3643	INSR	ASD ID/DD	4	nonsynonymous SNV,synonymous SNV,frameshift deletion	19p13.2	insulin receptor	protein-coding	0	1	0	0	0	0	0	1	0	0	0	0	0	0	0	0	0	1	0	0	0	0	0
25839	COG4	ASD ID/DD	2	synonymous SNV,nonsynonymous SNV	16q22.1	component of oligomeric golgi complex 4	protein-coding	1	0	0	0	0	0	0	0	0	0	0	0	0	0	0	0	0	0	1	0	0	0	0
2195	FAT1	ASD ID/DD	5	nonsynonymous SNV	4q35.2	FAT atypical cadherin 1	protein-coding	0	1	0	0	1	0	1	1	0	0	0	0	0	0	0	0	0	0	0	0	0	0	0
93627	TBCK	ASD ID/DD	3	nonsynonymous SNV	4q24	TBC1 domain containing kinase	protein-coding	0	0	0	0	0	0	0	0	0	0	0	0	0	0	0	0	0	0	1	0	0	0	0
55116	TMEM39B	ASD ID/DD	3	nonsynonymous SNV,stopgain	1p35.2	transmembrane protein 39B	protein-coding	0	0	0	0	0	0	0	0	0	0	0	0	0	0	0	0	0	1	0	0	0	0	0
7148	TNXB	ASD ID/DD	2	nonsynonymous SNV	6p21.33-p21.32	tenascin XB	protein-coding	0	0	0	0	1	0	0	0	0	0	0	0	0	0	0	0	0	0	0	0	0	0	0
9737	GPRASP1	ASD ID/DD	3	nonsynonymous SNV	Xq22.1	G protein-coupled receptor associated sorting protein 1	protein-coding	0	0	0	0	0	0	0	0	0	0	0	0	1	0	0	0	0	0	0	0	0	0	0
55633	TBC1D22B	ASD ID/DD	2	nonsynonymous SNV,synonymous SNV	6p21.2	TBC1 domain family member 22B	protein-coding	0	0	0	0	0	0	0	0	0	0	0	0	0	0	0	0	0	0	0	0	0	0	0
55262	C7orf43	ASD ID/DD	2	nonsynonymous SNV,frameshift deletion	7q22.1	chromosome 7 open reading frame 43	protein-coding	0	0	0	0	0	0	0	0	0	0	0	0	0	0	0	0	0	0	0	0	0	0	0
23218	NBEAL2	ASD ID/DD	6	nonsynonymous SNV,synonymous SNV,splice-site mutation	3p21.31	neurobeachin like 2	protein-coding	0	0	0	0	0	0	0	0	0	0	0	0	0	0	0	0	0	0	0	0	0	0	0
23352	UBR4	ASD ID/DD	6	nonsynonymous SNV	1p36.13	ubiquitin protein ligase E3 component n-recognin 4	protein-coding	0	1	0	0	0	0	0	1	1	0	0	0	0	0	0	0	0	0	0	0	1	0	1
54714	CNGB3	ASD ID/DD	2	stopgain,synonymous SNV	8q21.3	cyclic nucleotide gated channel beta 3	protein-coding	0	0	0	0	0	0	0	0	0	0	0	0	0	0	0	0	0	0	0	0	0	0	0
9718	ECE2	ASD ID/DD	3	nonsynonymous SNV	3q27.1	endothelin converting enzyme 2	protein-coding	0	0	0	0	0	0	0	0	0	0	0	0	0	0	0	0	0	0	0	0	0	0	0
11234	HPS5	ASD ID/DD	2	nonsynonymous SNV,synonymous SNV	11p15.1	HPS5, biogenesis of lysosomal organelles complex 2 subunit 2	protein-coding	0	0	0	0	0	0	0	0	0	0	0	0	0	0	0	0	0	0	0	0	0	0	0
10071	MUC12	ASD ID/DD	3	stopgain,nonsynonymous SNV,synonymous SNV	7q22.1	mucin 12, cell surface associated	protein-coding	0	0	0	0	0	0	0	0	0	0	0	0	0	0	0	0	0	0	0	0	0	0	0
65980	BRD9	ASD ID/DD	2	synonymous SNV,nonsynonymous SNV	5p15.33	bromodomain containing 9	protein-coding	1	0	0	0	0	0	0	0	0	0	0	0	0	0	0	0	1	0	0	0	0	0	0
9320	TRIP12	ASD ID/DD	10	stopgain,nonsynonymous SNV,frameshift deletion	2q36.3	thyroid hormone receptor interactor 12	protein-coding	1	0	0	0	0	0	1	0	0	0	0	0	0	0	0	0	0	0	1	1	1	1	1
152503	SH3D19	ASD ID/DD	3	stopgain,nonsynonymous SNV	4q31.3	SH3 domain containing 19	protein-coding	0	0	0	0	0	0	0	0	0	0	0	0	0	0	0	0	0	0	1	0	0	0	0
11186	RASSF1	ASD ID/DD	2	synonymous SNV,nonsynonymous SNV	3p21.31	Ras association domain family member 1	protein-coding	0	0	0	0	0	0	0	0	0	0	0	0	0	0	0	0	0	0	0	0	0	0	0
80232	WDR26	ASD ID/DD	4	nonsynonymous SNV,frameshift insertion,stopgain	1q42.11-q42.12	WD repeat domain 26	protein-coding	1	0	0	0	0	0	0	0	0	0	0	0	0	0	0	0	0	0	1	0	0	0	1
4650	MYO9B	ASD ID/DD	8	nonsynonymous SNV,frameshift insertion,synonymous SNV	19p13.11	myosin IXB	protein-coding	0	0	0	0	0	0	0	1	0	0	0	0	0	0	0	0	0	0	0	0	0	0	1
84340	GFM2	ASD ID/DD	2	nonsynonymous SNV	5q13.3	G elongation factor mitochondrial 2	protein-coding	0	0	0	0	0	0	0	0	0	0	0	0	0	0	0	0	0	0	0	0	0	0	0
79187	FSD1	ASD ID/DD	3	synonymous SNV,nonsynonymous SNV	19p13.3	fibronectin type III and SPRY domain containing 1	protein-coding	0	0	0	0	0	0	0	0	0	0	0	0	0	0	0	0	0	0	0	0	0	0	0
11033	ADAP1	ASD ID/DD	2	nonsynonymous SNV	7p22.3	ArfGAP with dual PH domains 1	protein-coding	0	0	0	0	0	0	1	0	1	0	0	0	0	0	0	0	0	0	0	0	0	0	0
56143	PCDHA5	ASD ID/DD	2	nonsynonymous SNV,synonymous SNV	5q31.3	protocadherin alpha 5	protein-coding	0	0	0	0	1	0	0	0	0	0	0	0	0	0	0	0	0	0	0	0	0	0	0
283149	BCL9L	ASD ID/DD	4	synonymous SNV,nonsynonymous SNV	11q23.3	B-cell CLL/lymphoma 9 like	protein-coding	0	0	0	0	0	0	1	0	0	0	0	0	0	0	0	0	0	0	0	0	0	0	1
22894	DIS3	ASD ID/DD	2	nonsynonymous SNV	13q21.33	DIS3 homolog, exosome endoribonuclease and 3'-5' exoribonuclease	protein-coding	1	0	0	0	0	0	0	0	0	0	0	0	0	0	0	0	0	1	0	0	0	0	0
23135	KDM6B	ASD ID/DD	7	frameshift deletion,nonsynonymous SNV,nonframeshift deletion,splice-site mutation,synonymous SNV	17p13.1	lysine demethylase 6B	protein-coding	0	1	0	0	0	0	1	0	0	0	0	0	0	0	0	0	1	0	0	0	1	0	1
9318	COPS2	ASD ID/DD	2	synonymous SNV,nonsynonymous SNV	15q21.1	COP9 signalosome subunit 2	protein-coding	1	1	0	0	0	0	0	0	0	0	0	0	0	0	0	0	0	1	0	0	0	0	1
286410	ATP11C	ASD ID/DD	2	nonsynonymous SNV	Xq27.1	ATPase phospholipid transporting 11C	protein-coding	0	0	0	0	0	0	0	1	0	0	0	0	0	0	0	0	0	1	0	0	0	0	1
3382	ICA1	ASD ID/DD	2	nonsynonymous SNV,synonymous SNV	7p21.3	islet cell autoantigen 1	protein-coding	0	0	0	0	0	0	0	0	1	0	0	0	0	0	0	0	0	0	0	0	0	0	0
8516	ITGA8	ASD ID/DD	3	nonsynonymous SNV,synonymous SNV	10p13	integrin subunit alpha 8	protein-coding	0	1	0	0	1	0	0	0	0	0	0	0	1	0	0	0	0	0	1	0	0	0	0
5862	RAB2A	ASD ID/DD	2	stopgain,nonsynonymous SNV	8q12.1-q12.2	RAB2A, member RAS oncogene family	protein-coding	1	0	0	0	0	0	0	0	0	0	0	0	0	0	0	1	0	0	0	0	0	0	1
23519	ANP32D	ASD ID/DD	2	nonsynonymous SNV	12q13.11	acidic nuclear phosphoprotein 32 family member D	protein-coding	0	0	0	0	0	0	0	0	0	0	0	0	0	0	0	0	0	0	0	0	0	0	0
389690	MROH5	ASD ID/DD	6	unknown	8q24.3	maestro heat like repeat family member 5	protein-coding	0	0	0	0	0	0	0	0	0	0	0	0	0	0	0	0	0	0	0	0	0	0	0
154865	IQUB	ASD ID/DD	3	nonsynonymous SNV	7q31.32	IQ motif and ubiquitin domain containing	protein-coding	0	0	0	0	0	0	0	0	0	0	0	0	0	0	0	0	0	0	0	0	0	0	0
143689	PIWIL4	ASD ID/DD	3	nonsynonymous SNV	11q21	piwi like RNA-mediated gene silencing 4	protein-coding	0	0	0	0	0	0	0	0	0	0	0	0	0	0	0	0	1	0	0	0	0	0	0
5990	RFX2	ASD ID/DD	4	nonsynonymous SNV	19p13.3	regulatory factor X2	protein-coding	0	0	1	0	0	0	0	0	0	0	0	0	0	0	0	0	0	0	0	0	1	0	1
4035	LRP1	ASD ID/DD	11	nonsynonymous SNV,synonymous SNV,frameshift deletion	12q13.3	LDL receptor related protein 1	protein-coding	0	1	0	0	0	0	1	0	0	0	0	0	0	0	0	0	0	0	0	0	1	0	1
8239	USP9X	ASD ID/DD	13	nonsynonymous SNV,synonymous SNV,frameshift deletion,frameshift insertion,nonframeshift deletion,splice-site mutation,stopgain	Xp11.4	ubiquitin specific peptidase 9, X-linked	protein-coding	1	0	0	0	0	0	1	0	0	0	0	0	0	0	0	1	0	1	1	0	0	0	1
3785	KCNQ2	ASD ID/DD	21	synonymous SNV,nonsynonymous SNV	20q13.33	potassium voltage-gated channel subfamily Q member 2	protein-coding	0	1	0	0	0	0	1	1	1	0	0	0	1	0	1	1	0	0	1	0	0	0	1
79822	ARHGAP28	ASD ID/DD	3	synonymous SNV,nonsynonymous SNV	18p11.31	Rho GTPase activating protein 28	protein-coding	0	0	0	0	0	1	0	0	0	0	0	0	0	0	0	0	0	0	0	0	0	0	0
10777	ARPP21	ASD ID/DD	2	nonframeshift deletion,synonymous SNV	3p22.3	cAMP regulated phosphoprotein 21	protein-coding	0	0	0	0	0	0	1	1	0	0	0	0	0	0	0	0	0	0	0	0	0	0	0
5214	PFKP	ASD ID/DD	3	nonsynonymous SNV	10p15.2	phosphofructokinase, platelet	protein-coding	0	0	0	0	0	0	0	0	1	0	0	0	0	0	0	1	0	0	0	0	0	0	0
57634	EP400	ASD ID/DD	9	nonsynonymous SNV,frameshift insertion,synonymous SNV,frameshift deletion	12q24.33	E1A binding protein p400	protein-coding	0	1	0	0	0	0	1	1	0	0	0	0	0	0	0	0	1	1	0	0	1	0	1
2743	GLRB	ASD ID/DD	2	synonymous SNV,stopgain	4q32.1	glycine receptor beta	protein-coding	0	1	0	0	0	0	0	0	0	0	0	0	1	0	0	0	0	0	0	0	0	0	0
10347	ABCA7	ASD ID/DD	2	nonsynonymous SNV	19p13.3	ATP binding cassette subfamily A member 7	protein-coding	0	0	0	0	0	0	0	0	0	0	0	0	0	0	0	0	0	0	0	0	0	0	0
6494	SIPA1	ASD ID/DD	2	nonsynonymous SNV,synonymous SNV	11q13.1	signal-induced proliferation-associated 1	protein-coding	0	0	0	0	0	0	0	0	0	0	0	0	0	0	0	0	0	0	0	0	0	0	0
6439	SFTPB	ASD ID/DD	2	nonsynonymous SNV	2p11.2	surfactant protein B	protein-coding	0	1	0	0	0	0	0	0	0	0	0	0	1	0	0	0	0	0	0	0	0	0	0
6812	STXBP1	ASD ID/DD	15	nonsynonymous SNV,frameshift deletion,frameshift insertion,stopgain,splice-site mutation	9q34.11	syntaxin binding protein 1	protein-coding	0	1	0	0	0	0	1	1	1	1	1	1	0	0	0	1	0	0	1	1	0	1	1
284361	EMC10	ASD ID/DD	2	synonymous SNV,nonsynonymous SNV	19q13.33	ER membrane protein complex subunit 10	protein-coding	1	0	0	0	0	0	0	0	0	0	0	0	1	0	0	0	0	0	0	0	0	0	0
91522	COL23A1	ASD ID/DD	4	nonsynonymous SNV,frameshift deletion	5q35.3	collagen type XXIII alpha 1 chain	protein-coding	0	0	0	0	0	0	0	0	0	0	0	0	0	0	0	0	0	0	0	0	0	0	0
23	ABCF1	ASD ID/DD	2	nonsynonymous SNV	6p21.33	ATP binding cassette subfamily F member 1	protein-coding	1	0	0	0	0	0	0	0	0	0	0	0	0	0	0	0	0	0	0	0	0	0	0
3069	HDLBP	ASD ID/DD	5	nonsynonymous SNV,synonymous SNV	2q37.3	high density lipoprotein binding protein	protein-coding	1	0	0	0	0	0	1	0	0	0	0	0	0	0	0	0	0	0	0	0	0	0	1
950	SCARB2	ASD ID/DD	2	nonsynonymous SNV,synonymous SNV	4q21.1	scavenger receptor class B member 2	protein-coding	1	0	0	0	0	0	0	0	0	0	0	0	1	0	0	0	0	0	0	0	0	0	0
8481	OFD1	ASD ID/DD	2	splice-site mutation,frameshift deletion	Xp22.2	OFD1, centriole and centriolar satellite protein	protein-coding	0	0	0	0	0	0	0	0	0	0	0	0	0	0	0	0	0	0	1	0	0	0	1
8291	DYSF	ASD ID/DD	4	nonsynonymous SNV,stopgain	2p13.2	dysferlin	protein-coding	0	0	0	0	0	0	0	0	0	0	0	0	1	0	0	0	0	0	0	0	0	0	0
10383	TUBB4B	ASD ID/DD	4	nonsynonymous SNV,synonymous SNV	9q34.3	tubulin beta 4B class IVb	protein-coding	0	0	0	0	0	0	0	0	1	0	0	0	0	0	0	0	0	0	0	0	1	0	1
55643	BTBD2	ASD ID/DD	4	synonymous SNV,nonsynonymous SNV	19p13.3	BTB domain containing 2	protein-coding	1	0	0	0	0	0	0	0	0	0	0	0	0	0	0	0	0	0	0	0	0	0	1
10297	APC2	ASD ID/DD	5	nonsynonymous SNV	19p13.3	APC2, WNT signaling pathway regulator	protein-coding	0	0	0	0	0	0	1	0	0	0	0	0	1	0	0	0	0	0	0	0	0	0	1
79759	ZNF668	ASD ID/DD	2	synonymous SNV,nonsynonymous SNV	16p11.2	zinc finger protein 668	protein-coding	1	0	1	0	0	0	0	0	0	0	0	0	0	0	0	0	0	0	0	0	0	0	0
23224	SYNE2	ASD ID/DD	3	synonymous SNV,nonsynonymous SNV	14q23.2	spectrin repeat containing nuclear envelope protein 2	protein-coding	0	0	0	0	0	0	0	1	0	0	0	0	0	0	0	0	0	1	0	0	0	0	0
9369	NRXN3	ASD ID/DD	2	nonsynonymous SNV,synonymous SNV	14q24.3-q31.1	neurexin 3	protein-coding	0	1	0	0	1	0	1	1	1	0	0	0	0	0	0	0	0	0	1	0	0	0	1
26037	SIPA1L1	ASD ID/DD	3	synonymous SNV,frameshift deletion	14q24.2	signal induced proliferation associated 1 like 1	protein-coding	0	0	0	0	0	0	1	0	1	0	0	0	0	0	0	0	0	0	0	0	0	0	1
136051	ZNF786	ASD ID/DD	2	nonsynonymous SNV,synonymous SNV	7q36.1	zinc finger protein 786	protein-coding	0	0	0	0	0	0	0	0	0	0	0	0	0	0	0	0	0	0	0	0	0	0	0
81890	QTRT1	ASD ID/DD	2	synonymous SNV,nonsynonymous SNV	19p13.2	queuine tRNA-ribosyltransferase catalytic subunit 1	protein-coding	1	0	0	0	0	0	0	0	0	0	0	0	0	0	0	0	0	0	0	0	0	0	0
1439	CSF2RB	ASD ID/DD	4	nonsynonymous SNV	22q12.3	colony stimulating factor 2 receptor beta common subunit	protein-coding	0	0	0	0	0	0	0	0	0	0	0	0	0	0	0	0	0	0	0	0	0	0	0
80274	SCUBE1	ASD ID/DD	2	nonsynonymous SNV	22q13.2	signal peptide, CUB domain and EGF like domain containing 1	protein-coding	0	1	0	0	0	0	0	0	0	0	0	0	0	0	0	0	0	1	0	0	0	0	1
2581	GALC	ASD ID/DD	4	synonymous SNV,nonsynonymous SNV	14q31.3	galactosylceramidase	protein-coding	0	1	0	0	0	0	0	0	0	0	0	0	1	0	0	0	0	0	1	0	0	0	0
4855	NOTCH4	ASD ID/DD	3	synonymous SNV,nonsynonymous SNV,stopgain	6p21.32	notch 4	protein-coding	0	0	0	0	0	0	0	0	0	0	0	0	0	0	0	0	0	0	0	0	0	0	0
221786	FAM200A	ASD ID/DD	2	synonymous SNV,stopgain	7q22.1	family with sequence similarity 200 member A	protein-coding	1	0	0	0	0	0	0	0	0	0	0	0	0	0	0	0	0	1	0	0	0	0	0
2591	GALNT3	ASD ID/DD	2	nonsynonymous SNV,splice-site mutation	2q24.3	polypeptide N-acetylgalactosaminyltransferase 3	protein-coding	0	0	0	0	0	0	0	0	0	0	0	0	0	0	0	0	0	0	0	0	0	0	0
10128	LRPPRC	ASD ID/DD	2	nonsynonymous SNV,splice-site mutation	2p21	leucine rich pentatricopeptide repeat containing	protein-coding	1	0	0	0	0	0	0	0	1	0	0	0	0	0	0	0	0	0	1	0	0	0	0
24144	TFIP11	ASD ID/DD	3	nonsynonymous SNV,nonframeshift deletion	22q12.1	tuftelin interacting protein 11	protein-coding	1	0	0	0	0	0	0	0	0	0	0	0	0	0	0	0	0	0	0	0	0	0	0
55757	UGGT2	ASD ID/DD	3	nonsynonymous SNV	13q32.1	UDP-glucose glycoprotein glucosyltransferase 2	protein-coding	0	0	0	0	0	0	0	0	0	0	0	0	0	0	0	0	0	0	0	0	0	0	0
50700	RDH8	ASD ID/DD	3	nonsynonymous SNV	19p13.2	retinol dehydrogenase 8 (all-trans)	protein-coding	0	0	0	0	0	0	0	0	0	0	0	0	0	0	0	0	0	0	0	0	0	0	0
11064	CNTRL	ASD ID/DD	3	synonymous SNV,nonsynonymous SNV	9q33.2	centriolin	protein-coding	0	0	0	0	0	0	0	0	0	0	0	0	0	0	0	0	0	0	0	0	0	0	0
5296	PIK3R2	ASD ID/DD	2	nonsynonymous SNV	19p13.11	phosphoinositide-3-kinase regulatory subunit 2	protein-coding	0	0	0	0	0	1	0	0	0	0	0	0	0	0	0	0	0	1	0	0	0	0	1
200081	TXLNA	ASD ID/DD	2	nonframeshift deletion,nonsynonymous SNV	1p35.2	taxilin alpha	protein-coding	1	0	0	0	0	0	0	0	0	0	0	0	0	0	0	0	0	0	0	0	0	0	1
83660	TLN2	ASD ID/DD	3	synonymous SNV,nonframeshift deletion,nonsynonymous SNV	15q22.2	talin 2	protein-coding	0	0	0	0	0	0	1	0	0	0	0	0	0	0	0	0	0	0	0	0	0	0	1
55558	PLXNA3	ASD ID/DD	2	splice-site mutation,stopgain	Xq28	plexin A3	protein-coding	0	0	0	0	0	0	0	0	0	0	0	0	0	0	0	0	0	1	0	0	0	0	1
10257	ABCC4	ASD ID/DD	2	nonsynonymous SNV	13q32.1	ATP binding cassette subfamily C member 4	protein-coding	0	0	0	0	0	0	0	0	0	0	0	0	1	0	0	0	0	0	0	0	0	0	0
8612	PLPP2	ASD ID/DD	3	nonframeshift deletion,nonsynonymous SNV,synonymous SNV	19p13.3	phospholipid phosphatase 2	protein-coding	0	0	0	0	0	0	0	0	0	0	0	0	0	0	0	0	0	0	0	0	0	0	0
7430	EZR	ASD ID/DD	5	synonymous SNV,nonsynonymous SNV	6q25.3	ezrin	protein-coding	0	1	0	0	0	1	0	0	1	0	0	0	0	0	0	0	0	0	0	0	0	0	1
672	BRCA1	ASD ID/DD	4	stopgain,synonymous SNV,nonsynonymous SNV	17q21.31	BRCA1, DNA repair associated	protein-coding	0	1	0	0	0	0	0	0	0	0	0	0	1	0	0	0	1	1	1	0	0	0	0
9969	MED13	ASD ID/DD	3	frameshift deletion,nonsynonymous SNV	17q23.2	mediator complex subunit 13	protein-coding	1	0	0	0	0	0	1	0	0	0	0	0	0	0	0	0	0	1	0	0	1	0	1
4482	MSRA	ASD ID/DD	2	synonymous SNV	8p23.1	methionine sulfoxide reductase A	protein-coding	1	0	0	0	0	0	0	0	0	0	0	0	1	0	0	0	0	0	0	0	0	0	0
7224	TRPC5	ASD ID/DD	3	synonymous SNV,nonsynonymous SNV	Xq23	transient receptor potential cation channel subfamily C member 5	protein-coding	0	0	0	0	0	0	0	0	0	0	0	0	1	1	0	0	0	0	0	0	0	0	1
55680	RUFY2	ASD ID/DD	2	nonsynonymous SNV	10q21.3	RUN and FYVE domain containing 2	protein-coding	0	0	0	0	0	0	0	0	0	0	0	0	0	0	0	0	0	0	0	0	0	0	0
10663	CXCR6	ASD ID/DD	2	synonymous SNV,nonsynonymous SNV	3p21.31	C-X-C motif chemokine receptor 6	protein-coding	0	0	0	0	0	0	0	0	0	0	0	0	0	0	0	0	0	0	0	0	0	0	0
590	BCHE	ASD ID/DD	2	nonsynonymous SNV,stopgain	3q26.1	butyrylcholinesterase	protein-coding	0	0	0	0	0	0	0	0	0	0	0	0	0	0	0	0	0	0	0	0	0	0	0
6925	TCF4	ASD ID/DD	19	synonymous SNV,frameshift deletion,frameshift insertion,nonsynonymous SNV,splice-site mutation,stopgain	18q21.2	transcription factor 4	protein-coding	0	1	0	0	0	0	1	1	0	0	0	0	0	0	0	0	0	0	0	0	1	0	1
8914	TIMELESS	ASD ID/DD	2	nonsynonymous SNV	12q13.3	timeless circadian regulator	protein-coding	0	1	0	0	0	0	0	0	0	0	0	0	0	0	0	0	0	1	0	0	0	0	0
5832	ALDH18A1	ASD ID/DD	2	nonsynonymous SNV,nonframeshift deletion	10q24.1	aldehyde dehydrogenase 18 family member A1	protein-coding	0	0	0	0	0	0	0	0	0	0	0	0	0	0	0	0	0	1	1	0	0	0	0
2264	FGFR4	ASD ID/DD	3	synonymous SNV,nonsynonymous SNV	5q35.2	fibroblast growth factor receptor 4	protein-coding	0	0	0	0	0	0	0	0	0	0	0	0	0	0	0	0	0	0	0	0	0	0	0
23309	SIN3B	ASD ID/DD	4	nonsynonymous SNV,synonymous SNV	19p13.11	SIN3 transcription regulator family member B	protein-coding	0	1	0	0	0	0	0	0	0	0	0	0	0	0	0	0	0	0	0	0	0	0	1
10072	DPP3	ASD ID/DD	3	nonsynonymous SNV,splice-site mutation	11q13.2	dipeptidyl peptidase 3	protein-coding	0	0	0	0	0	0	0	0	0	0	0	0	0	0	0	0	0	1	0	0	0	0	0
3679	ITGA7	ASD ID/DD	3	nonsynonymous SNV,synonymous SNV	12q13.2	integrin subunit alpha 7	protein-coding	0	1	0	0	1	0	0	1	0	0	0	0	0	0	0	0	0	0	1	0	0	0	0
23098	SARM1	ASD ID/DD	4	nonsynonymous SNV	17q11.2	sterile alpha and TIR motif containing 1	protein-coding	0	0	0	0	0	0	0	0	0	0	0	0	0	0	0	0	0	1	0	0	0	0	0
66002	CYP4F12	ASD ID/DD	3	nonsynonymous SNV,synonymous SNV	19p13.12	cytochrome P450 family 4 subfamily F member 12	protein-coding	0	0	0	0	0	0	0	0	0	0	0	0	0	0	0	0	0	0	0	0	0	0	0
64131	XYLT1	ASD ID/DD	3	nonsynonymous SNV	16p12.3	xylosyltransferase 1	protein-coding	0	0	0	0	0	0	0	0	0	0	0	0	0	0	0	0	0	0	1	0	0	0	1
161882	ZFPM1	ASD ID/DD	5	synonymous SNV,nonsynonymous SNV	16q24.2	zinc finger protein, FOG family member 1	protein-coding	0	1	1	0	0	0	0	0	0	0	0	0	0	0	0	0	0	0	0	0	0	0	0
64900	LPIN3	ASD ID/DD	2	synonymous SNV,nonsynonymous SNV	20q12	lipin 3	protein-coding	0	0	0	0	0	0	0	0	0	0	0	0	0	0	0	0	0	0	0	0	0	0	0
79066	METTL16	ASD ID/DD	2	nonsynonymous SNV,synonymous SNV	17p13.3	methyltransferase like 16	protein-coding	1	0	0	0	0	0	0	0	0	0	0	0	0	0	0	0	0	0	0	0	0	0	1
5336	PLCG2	ASD ID/DD	5	nonsynonymous SNV	16q23.3	phospholipase C gamma 2	protein-coding	0	0	0	0	0	0	0	0	0	0	0	0	0	0	0	0	0	0	1	0	0	0	1
1804	DPP6	ASD ID/DD	2	nonsynonymous SNV,synonymous SNV	7q36.2	dipeptidyl peptidase like 6	protein-coding	0	0	0	0	0	0	0	0	1	0	0	0	0	1	1	1	0	0	0	0	0	0	1
24149	ZNF318	ASD ID/DD	2	nonsynonymous SNV	6p21.1	zinc finger protein 318	protein-coding	0	0	0	0	0	0	0	0	0	0	0	0	0	0	0	0	0	0	0	0	0	0	0
84915	FAM222A	ASD ID/DD	3	nonsynonymous SNV,synonymous SNV	12q24.11	family with sequence similarity 222 member A	protein-coding	0	0	0	0	0	0	0	0	0	0	0	0	0	0	0	0	0	0	0	0	0	0	0
2566	GABRG2	ASD ID/DD	3	nonsynonymous SNV	5q34	gamma-aminobutyric acid type A receptor gamma2 subunit	protein-coding	0	1	0	0	0	0	0	1	0	0	0	0	1	0	1	0	0	0	1	0	0	0	1
5493	PPL	ASD ID/DD	3	nonsynonymous SNV	16p13.3	periplakin	protein-coding	0	0	0	0	0	0	0	0	0	0	0	0	0	0	0	0	0	0	0	0	0	0	0
29951	PDZRN4	ASD ID/DD	4	nonsynonymous SNV,synonymous SNV	12q12	PDZ domain containing ring finger 4	protein-coding	0	0	0	0	0	0	0	0	0	0	0	0	0	0	0	0	0	0	0	0	0	0	0
284217	LAMA1	ASD ID/DD	8	nonsynonymous SNV,synonymous SNV	18p11.31	laminin subunit alpha 1	protein-coding	0	1	0	0	1	0	0	0	0	0	0	0	0	0	0	0	0	0	1	0	0	0	0
57519	STARD9	ASD ID/DD	5	nonsynonymous SNV,stopgain,frameshift deletion,splice-site mutation	15q15.2	StAR related lipid transfer domain containing 9	protein-coding	0	0	0	0	0	0	0	0	0	0	0	0	0	0	0	0	0	0	0	0	0	0	0
9730	DCAF1	ASD ID/DD	2	nonsynonymous SNV,synonymous SNV	3p21.2	DDB1 and CUL4 associated factor 1	protein-coding	0	1	0	0	0	0	0	0	0	0	0	0	0	0	0	0	0	0	0	0	0	0	0
387640	SKIDA1	ASD ID/DD	4	frameshift deletion,frameshift insertion,nonsynonymous SNV	10p12.31	SKI/DACH domain containing 1	protein-coding	0	0	0	0	0	0	0	0	0	0	0	0	0	0	0	0	0	1	0	0	1	0	0
4437	MSH3	ASD ID/DD	3	nonsynonymous SNV,synonymous SNV	5q14.1	mutS homolog 3	protein-coding	1	0	0	0	0	0	0	0	0	0	0	0	0	0	0	0	0	0	0	0	0	0	0
2980	GUCA2A	ASD ID/DD	2	nonsynonymous SNV,stopgain	1p34.2	guanylate cyclase activator 2A	protein-coding	0	0	0	0	0	0	0	0	0	0	0	0	0	0	0	0	0	0	0	0	0	0	0
124602	KIF19	ASD ID/DD	4	synonymous SNV,nonsynonymous SNV	17q25.1	kinesin family member 19	protein-coding	0	0	0	0	0	0	0	0	0	0	0	0	0	0	0	0	0	0	0	0	0	0	0
8483	CILP	ASD ID/DD	2	synonymous SNV	15q22.31	cartilage intermediate layer protein	protein-coding	0	0	0	0	0	0	0	0	0	0	0	0	0	0	0	0	0	0	0	0	0	0	0
64855	FAM129B	ASD ID/DD	3	nonsynonymous SNV,synonymous SNV	9q34.11	family with sequence similarity 129 member B	protein-coding	0	0	0	0	0	0	0	0	0	0	0	0	0	0	0	0	0	0	0	0	0	0	0
79782	LRRC31	ASD ID/DD	2	nonsynonymous SNV	3q26.2	leucine rich repeat containing 31	protein-coding	0	0	0	0	0	0	0	0	0	0	0	0	0	0	0	0	0	0	0	0	0	0	0
57521	RPTOR	ASD ID/DD	3	nonsynonymous SNV	17q25.3	regulatory associated protein of MTOR complex 1	protein-coding	0	1	0	0	0	0	1	0	0	0	0	0	0	0	0	0	0	0	0	0	0	0	1
285550	FAM200B	ASD ID/DD	2	stopgain,frameshift deletion	4p15.32	family with sequence similarity 200 member B	protein-coding	0	0	0	0	0	0	0	0	0	0	0	0	0	0	0	0	0	0	0	0	0	0	0
9940	DLEC1	ASD ID/DD	2	nonsynonymous SNV	3p22.2	deleted in lung and esophageal cancer 1	protein-coding	0	0	0	0	0	0	0	0	0	0	0	0	0	0	0	0	0	0	0	0	0	0	0
221981	THSD7A	ASD ID/DD	3	stopgain,nonsynonymous SNV	7p21.3	thrombospondin type 1 domain containing 7A	protein-coding	0	0	0	0	0	0	0	0	0	0	0	0	0	0	0	0	0	0	0	0	1	0	1
341019	DCDC1	ASD ID/DD	3	nonsynonymous SNV,frameshift insertion	11p13	doublecortin domain containing 1	protein-coding	0	0	0	0	0	0	0	0	0	0	0	0	0	0	0	0	0	0	0	0	0	0	0
57674	RNF213	ASD ID/DD	5	splice-site mutation,nonsynonymous SNV,synonymous SNV	17q25.3	ring finger protein 213	protein-coding	0	0	0	0	0	0	0	0	0	0	0	0	0	0	0	0	0	0	0	0	0	0	0
192670	AGO4	ASD ID/DD	3	nonsynonymous SNV,synonymous SNV	1p34.3	argonaute 4, RISC catalytic component	protein-coding	0	0	0	0	0	0	0	0	0	0	0	0	0	0	0	0	0	0	0	0	1	0	1
6405	SEMA3F	ASD ID/DD	2	nonsynonymous SNV	3p21.31	semaphorin 3F	protein-coding	0	0	0	0	0	0	0	0	0	0	0	0	0	0	0	0	0	0	0	0	0	0	1
79158	GNPTAB	ASD ID/DD	3	nonsynonymous SNV,synonymous SNV	12q23.2	N-acetylglucosamine-1-phosphate transferase alpha and beta subunits	protein-coding	0	0	0	0	0	0	0	0	0	0	0	0	0	0	0	0	0	0	1	0	0	0	0
3688	ITGB1	ASD ID/DD	3	nonsynonymous SNV	10p11.22	integrin subunit beta 1	protein-coding	1	1	0	0	1	1	0	1	0	0	0	0	1	0	0	0	0	0	0	0	0	0	1
9578	CDC42BPB	ASD ID/DD	7	stopgain,nonsynonymous SNV,nonframeshift insertion,frameshift insertion	14q32.32	CDC42 binding protein kinase beta	protein-coding	0	0	0	0	0	0	1	0	1	0	0	0	0	0	0	0	0	0	0	0	1	1	1
219699	UNC5B	ASD ID/DD	2	synonymous SNV,nonsynonymous SNV	10q22.1	unc-5 netrin receptor B	protein-coding	0	1	0	0	0	0	0	0	0	0	0	0	0	0	0	0	0	0	0	0	0	0	0
90850	ZNF598	ASD ID/DD	2	stopgain,synonymous SNV	16p13.3	zinc finger protein 598	protein-coding	1	0	0	0	0	0	0	0	0	0	0	0	0	0	0	0	0	0	0	0	0	0	0
9569	GTF2IRD1	ASD ID/DD	3	nonsynonymous SNV	7q11.23	GTF2I repeat domain containing 1	protein-coding	0	1	0	0	0	0	0	0	0	0	0	0	1	0	0	0	0	0	0	0	1	0	1
8970	HIST1H2BJ	ASD ID/DD	2	nonsynonymous SNV,synonymous SNV	6p22.1	histone cluster 1 H2B family member j	protein-coding	0	0	0	0	0	0	0	0	0	0	0	0	0	0	0	0	0	0	0	0	0	0	0
2819	GPD1	ASD ID/DD	2	synonymous SNV,nonsynonymous SNV	12q13.12	glycerol-3-phosphate dehydrogenase 1	protein-coding	0	0	0	0	0	0	0	0	0	0	0	0	0	0	0	0	0	0	0	0	0	0	0
114815	SORCS1	ASD ID/DD	3	nonsynonymous SNV,synonymous SNV	10q25.1	sortilin related VPS10 domain containing receptor 1	protein-coding	0	0	0	0	0	0	0	0	0	0	0	0	0	0	0	0	0	0	0	0	0	0	1
84953	MICALCL	ASD ID/DD	2	nonsynonymous SNV,synonymous SNV	11p15.3	MICAL C-terminal like	protein-coding	0	0	0	0	0	0	0	0	0	0	0	0	0	0	0	0	0	0	0	0	0	0	0
8314	BAP1	ASD ID/DD	2	nonsynonymous SNV	3p21.1	BRCA1 associated protein 1	protein-coding	1	0	0	0	0	0	1	0	0	0	0	0	0	0	0	0	0	0	0	0	0	0	0
10640	EXOC5	ASD ID/DD	2	nonsynonymous SNV	14q22.3	exocyst complex component 5	protein-coding	0	0	0	0	0	0	0	0	1	0	0	0	0	0	0	0	0	1	0	0	0	0	1
80124	VCPIP1	ASD ID/DD	2	stopgain,nonsynonymous SNV	8q13.1	valosin containing protein interacting protein 1	protein-coding	0	0	0	0	0	0	0	0	1	0	0	0	0	0	0	1	0	0	0	0	0	0	1
4929	NR4A2	ASD ID/DD	5	nonsynonymous SNV,synonymous SNV	2q24.1	nuclear receptor subfamily 4 group A member 2	protein-coding	0	1	1	0	0	0	0	0	0	0	0	0	1	0	0	0	0	0	0	0	0	0	1
270	AMPD1	ASD ID/DD	2	frameshift insertion,synonymous SNV	1p13.2	adenosine monophosphate deaminase 1	protein-coding	0	0	0	0	0	0	0	0	0	0	0	0	0	0	0	0	0	0	0	0	0	0	0
6683	SPAST	ASD ID/DD	4	frameshift deletion,frameshift insertion,nonsynonymous SNV,synonymous SNV	2p22.3	spastin	protein-coding	0	0	0	0	0	0	0	0	0	0	0	0	1	0	0	0	0	1	0	0	1	1	1
79671	NLRX1	ASD ID/DD	3	nonsynonymous SNV,synonymous SNV	11q23.3	NLR family member X1	protein-coding	0	0	0	0	0	0	0	0	0	0	0	0	0	0	0	1	0	0	0	0	0	0	0
23742	NPAP1	ASD ID/DD	3	synonymous SNV,nonsynonymous SNV	15q11.2	nuclear pore associated protein 1	protein-coding	0	0	0	0	0	0	0	0	0	0	0	0	0	0	0	0	0	0	0	0	0	0	0
26504	CNNM4	ASD ID/DD	2	synonymous SNV,nonframeshift deletion	2q11.2	cyclin and CBS domain divalent metal cation transport mediator 4	protein-coding	0	0	0	0	0	0	0	0	0	0	0	0	0	0	0	0	0	0	0	0	0	0	0
137970	UNC5D	ASD ID/DD	2	nonsynonymous SNV	8p12	unc-5 netrin receptor D	protein-coding	0	0	0	0	0	0	0	1	0	0	0	0	0	0	0	0	0	0	0	0	0	0	0
10484	SEC23A	ASD ID/DD	2	nonsynonymous SNV	14q21.1	Sec23 homolog A, coat complex II component	protein-coding	1	0	0	0	0	0	1	0	1	0	0	0	0	0	0	0	0	0	0	0	0	0	0
51678	MPP6	ASD ID/DD	3	nonsynonymous SNV,splice-site mutation	7p15.3	membrane palmitoylated protein 6	protein-coding	0	0	0	0	0	0	0	1	1	0	0	0	0	0	0	0	0	0	0	0	0	0	1
123169	LEO1	ASD ID/DD	3	stopgain,frameshift deletion,nonsynonymous SNV	15q21.2	LEO1 homolog, Paf1/RNA polymerase II complex component	protein-coding	0	0	0	0	0	0	0	0	0	0	0	0	0	0	0	0	0	0	0	0	0	0	1
246176	GAS2L2	ASD ID/DD	4	nonsynonymous SNV,synonymous SNV	17q12	growth arrest specific 2 like 2	protein-coding	0	0	0	0	0	0	0	0	0	0	0	0	0	0	0	0	0	0	0	0	0	0	0
5728	PTEN	ASD ID/DD	6	nonsynonymous SNV,splice-site mutation,stopgain	10q23.31	phosphatase and tensin homolog	protein-coding	1	1	0	0	0	0	1	0	0	0	0	0	1	0	0	0	0	0	1	1	1	1	1
11188	NISCH	ASD ID/DD	4	nonsynonymous SNV,nonframeshift deletion,synonymous SNV	3p21.1	nischarin	protein-coding	1	0	0	0	0	0	1	0	0	0	0	0	0	0	0	0	0	0	0	0	0	0	0
256646	NUTM1	ASD ID/DD	3	nonsynonymous SNV	15q14	NUT midline carcinoma family member 1	protein-coding	0	0	0	0	0	0	0	0	0	0	0	0	0	0	0	0	0	0	0	0	0	0	0
5168	ENPP2	ASD ID/DD	2	nonsynonymous SNV	8q24.12	ectonucleotide pyrophosphatase/phosphodiesterase 2	protein-coding	0	1	0	0	0	0	0	0	0	0	0	0	0	0	0	0	0	0	0	0	0	0	0
23241	PACS2	ASD ID/DD	4	nonsynonymous SNV	14q32.33	phosphofurin acidic cluster sorting protein 2	protein-coding	0	0	0	0	0	0	1	0	0	0	0	0	1	0	0	0	0	0	0	0	1	0	1
3778	KCNMA1	ASD ID/DD	5	nonsynonymous SNV,synonymous SNV	10q22.3	potassium calcium-activated channel subfamily M alpha 1	protein-coding	0	0	0	0	0	0	1	1	1	0	0	0	1	0	1	1	0	0	0	0	1	0	1
375056	MIA3	ASD ID/DD	3	nonsynonymous SNV,frameshift deletion	1q41	MIA family member 3, ER export factor	protein-coding	1	0	1	0	1	0	0	0	0	0	0	0	0	0	0	0	0	0	0	0	0	0	0
2155	F7	ASD ID/DD	2	synonymous SNV,nonsynonymous SNV	13q34	coagulation factor VII	protein-coding	0	1	0	0	0	0	0	0	0	0	0	0	0	0	0	0	0	0	0	0	0	0	0
148741	ANKRD35	ASD ID/DD	3	synonymous SNV,nonsynonymous SNV	1q21.1	ankyrin repeat domain 35	protein-coding	0	0	0	0	0	0	0	0	0	0	0	0	0	0	0	0	0	0	0	0	0	0	0
4052	LTBP1	ASD ID/DD	2	nonsynonymous SNV	2p22.3	latent transforming growth factor beta binding protein 1	protein-coding	0	1	0	0	0	0	0	0	0	0	0	0	0	0	0	0	0	0	0	0	0	0	0
5956	OPN1LW	ASD ID/DD	2	synonymous SNV	Xq28	opsin 1, long wave sensitive	protein-coding	0	0	0	0	0	0	0	0	0	0	0	0	0	0	0	0	0	0	0	0	0	0	1
56261	GPCPD1	ASD ID/DD	2	nonsynonymous SNV,synonymous SNV	20p12.3	glycerophosphocholine phosphodiesterase 1	protein-coding	0	0	0	0	0	0	0	0	0	0	0	0	0	0	0	0	0	0	0	0	0	0	0
5738	PTGFRN	ASD ID/DD	4	nonsynonymous SNV	1p13.1	prostaglandin F2 receptor inhibitor	protein-coding	0	0	0	0	0	0	0	0	0	0	0	0	1	0	0	0	0	0	0	0	0	0	0
253738	EBF3	ASD ID/DD	8	nonsynonymous SNV,frameshift deletion,splice-site mutation,synonymous SNV	10q26.3	early B-cell factor 3	protein-coding	0	1	0	0	0	0	0	0	0	0	0	0	0	0	0	0	0	0	1	0	0	0	1
65981	CAPRIN2	ASD ID/DD	2	nonsynonymous SNV	12p11.21	caprin family member 2	protein-coding	0	0	0	0	0	0	0	0	0	0	0	0	0	0	0	0	0	0	0	0	0	0	0
3739	KCNA4	ASD ID/DD	3	nonsynonymous SNV,nonframeshift deletion	11p14.1	potassium voltage-gated channel subfamily A member 4	protein-coding	0	0	0	0	0	0	0	0	0	0	0	0	1	0	0	0	0	0	0	0	0	0	1
343450	KCNT2	ASD ID/DD	2	nonsynonymous SNV	1q31.3	potassium sodium-activated channel subfamily T member 2	protein-coding	0	0	0	0	0	0	0	0	0	0	0	0	0	0	0	0	0	0	0	0	0	0	0
27327	TNRC6A	ASD ID/DD	2	nonsynonymous SNV	16p12.1	trinucleotide repeat containing 6A	protein-coding	1	0	0	0	0	0	0	0	0	0	0	0	0	0	0	0	0	0	0	0	0	0	1
23389	MED13L	ASD ID/DD	25	splice-site mutation,stopgain,frameshift deletion,frameshift insertion,nonsynonymous SNV	12q24.21	mediator complex subunit 13 like	protein-coding	0	0	0	0	0	0	1	0	0	0	0	0	0	0	0	0	0	1	1	0	1	1	1
3980	LIG3	ASD ID/DD	3	frameshift deletion,nonsynonymous SNV	17q12	DNA ligase 3	protein-coding	1	1	0	0	0	0	0	0	0	0	0	0	0	0	0	0	0	1	0	0	0	0	0
90381	TICRR	ASD ID/DD	3	synonymous SNV,nonsynonymous SNV,stopgain	15q26.1	TOPBP1 interacting checkpoint and replication regulator	protein-coding	0	0	0	0	0	0	0	0	0	0	0	0	0	0	0	0	0	1	0	0	0	0	0
3702	ITK	ASD ID/DD	3	nonsynonymous SNV,synonymous SNV	5q33.3	IL2 inducible T-cell kinase	protein-coding	0	0	0	0	0	0	0	0	0	0	0	0	0	0	0	0	0	0	0	0	0	0	0
3482	IGF2R	ASD ID/DD	3	nonsynonymous SNV	6q25.3	insulin like growth factor 2 receptor	protein-coding	0	1	0	0	0	0	0	0	0	0	0	0	1	0	0	0	0	0	0	0	0	0	1
9724	UTP14C	ASD ID/DD	2	nonsynonymous SNV,nonframeshift deletion	13q14.3	UTP14C, small subunit processome component	protein-coding	1	0	0	0	0	0	0	0	0	0	0	0	0	0	0	0	0	0	0	0	0	0	0
79778	MICALL2	ASD ID/DD	2	synonymous SNV,nonsynonymous SNV	7p22.3	MICAL like 2	protein-coding	0	0	0	0	0	0	0	0	0	0	0	0	0	0	0	0	0	0	0	0	0	0	0
3104	ZBTB48	ASD ID/DD	3	nonsynonymous SNV,synonymous SNV	1p36.31	zinc finger and BTB domain containing 48	protein-coding	0	0	1	0	0	0	0	0	0	0	0	0	0	0	0	0	0	0	0	0	0	0	0
2975	GTF3C1	ASD ID/DD	4	nonsynonymous SNV,frameshift insertion	16p12.1	general transcription factor IIIC subunit 1	protein-coding	1	1	0	0	0	0	1	0	0	0	0	0	0	0	0	0	0	0	0	0	1	0	1
6734	SRPRA	ASD ID/DD	2	nonsynonymous SNV,splice-site mutation	11q24.2	SRP receptor alpha subunit	protein-coding	1	0	0	0	0	0	0	0	0	0	0	0	0	0	0	0	0	0	0	0	0	0	1
5017	OVOL1	ASD ID/DD	2	frameshift insertion,nonsynonymous SNV	11q13.1	ovo like transcriptional repressor 1	protein-coding	0	1	1	0	0	0	0	0	0	0	0	0	0	0	0	0	0	0	0	0	0	0	0
10171	RCL1	ASD ID/DD	3	synonymous SNV	9p24.1	RNA terminal phosphate cyclase like 1	protein-coding	0	0	0	0	0	0	0	0	0	0	0	0	0	0	0	0	0	0	0	0	0	0	1
23217	ZFR2	ASD ID/DD	5	nonsynonymous SNV,synonymous SNV	19p13.3	zinc finger RNA binding protein 2	protein-coding	0	0	0	0	0	0	0	0	0	0	0	0	0	0	0	0	0	0	0	0	0	0	0
170302	ARX	ASD ID/DD	2	nonsynonymous SNV,nonframeshift deletion	Xp21.3	aristaless related homeobox	protein-coding	0	1	1	0	0	0	0	0	0	0	0	0	1	0	1	0	0	0	1	0	0	0	0
54910	SEMA4C	ASD ID/DD	3	nonsynonymous SNV	2q11.2	semaphorin 4C	protein-coding	0	1	0	0	0	0	0	0	0	0	0	0	0	0	0	0	0	1	0	0	0	0	1
56254	RNF20	ASD ID/DD	4	synonymous SNV,frameshift insertion,nonsynonymous SNV	9q31.1	ring finger protein 20	protein-coding	0	0	0	0	0	0	0	0	0	0	0	0	0	0	0	0	1	0	0	0	0	0	0
55761	TTC17	ASD ID/DD	2	nonsynonymous SNV	11p12-p11.2	tetratricopeptide repeat domain 17	protein-coding	1	0	0	0	0	0	0	0	0	0	0	0	0	0	0	0	0	0	0	0	0	0	1
2196	FAT2	ASD ID/DD	5	nonsynonymous SNV,synonymous SNV	5q33.1	FAT atypical cadherin 2	protein-coding	0	0	0	0	1	0	1	0	0	0	0	0	0	0	0	0	0	0	0	0	0	0	0
7296	TXNRD1	ASD ID/DD	2	unknown	12q23.3	thioredoxin reductase 1	protein-coding	1	1	0	0	0	0	0	0	0	0	0	0	0	0	0	0	0	0	0	0	0	0	0
127254	ERICH3	ASD ID/DD	2	nonsynonymous SNV	1p31.1	glutamate rich 3	protein-coding	0	0	0	0	0	0	0	0	0	0	0	0	0	0	0	0	0	0	0	0	0	0	0
259266	ASPM	ASD ID/DD	2	nonsynonymous SNV	1q31.3	abnormal spindle microtubule assembly	protein-coding	0	0	0	0	0	0	0	0	0	0	0	0	0	0	0	0	0	1	1	0	0	0	0
4131	MAP1B	ASD ID/DD	3	nonsynonymous SNV,frameshift deletion	5q13.2	microtubule associated protein 1B	protein-coding	0	1	0	0	0	0	1	0	1	0	0	0	1	0	1	1	0	1	0	0	0	0	1
5595	MAPK3	ASD ID/DD	3	nonsynonymous SNV	16p11.2	mitogen-activated protein kinase 3	protein-coding	0	0	0	0	0	0	0	0	0	0	1	0	1	1	0	0	0	0	0	0	0	0	0
23503	ZFYVE26	ASD ID/DD	5	frameshift deletion,nonsynonymous SNV	14q24.1	zinc finger FYVE-type containing 26	protein-coding	0	0	0	0	0	0	0	0	0	0	0	0	0	0	0	0	0	1	1	0	0	0	0
23019	CNOT1	ASD ID/DD	6	nonsynonymous SNV,stopgain,synonymous SNV	16q21	CCR4-NOT transcription complex subunit 1	protein-coding	1	0	0	0	0	0	0	0	0	0	0	0	0	0	0	0	0	1	0	0	0	0	1
71	ACTG1	ASD ID/DD	2	synonymous SNV,nonsynonymous SNV	17q25.3	actin gamma 1	protein-coding	0	1	0	0	0	0	0	0	0	0	0	0	0	0	0	0	0	1	0	0	0	0	0
6535	SLC6A8	ASD ID/DD	4	nonframeshift deletion,splice-site mutation,synonymous SNV	Xq28	solute carrier family 6 member 8	protein-coding	0	0	0	0	0	0	0	0	0	0	0	0	1	0	0	0	0	0	1	0	0	0	1
11276	SYNRG	ASD ID/DD	3	nonsynonymous SNV,synonymous SNV	17q12	synergin gamma	protein-coding	0	0	0	0	0	0	0	0	0	0	0	0	0	0	0	0	0	1	0	0	0	0	1
2915	GRM5	ASD ID/DD	3	nonframeshift deletion,nonsynonymous SNV	11q14.2-q14.3	glutamate metabotropic receptor 5	protein-coding	0	0	0	0	0	0	1	1	1	0	0	0	1	1	1	1	0	0	0	0	0	0	1
463	ZFHX3	ASD ID/DD	8	synonymous SNV,frameshift insertion,nonframeshift deletion,nonsynonymous SNV,frameshift deletion,stopgain	16q22.2-q22.3	zinc finger homeobox 3	protein-coding	0	0	1	0	0	0	0	0	0	0	0	0	1	0	0	0	0	0	0	0	1	0	1
8379	MAD1L1	ASD ID/DD	2	stopgain,nonsynonymous SNV	7p22.3	mitotic arrest deficient 1 like 1	protein-coding	0	1	0	0	0	0	0	0	0	0	0	0	0	0	0	0	0	0	0	0	0	0	0
196441	ZFC3H1	ASD ID/DD	4	synonymous SNV,frameshift deletion,nonsynonymous SNV	12q21.1	zinc finger C3H1-type containing	protein-coding	0	0	0	0	0	0	0	0	0	0	0	0	0	0	0	0	0	0	0	0	0	0	1
1363	CPE	ASD ID/DD	2	synonymous SNV,nonsynonymous SNV	4q32.3	carboxypeptidase E	protein-coding	0	0	0	0	0	0	1	0	0	0	0	0	1	0	0	0	0	0	0	0	0	0	1
221400	TDRD6	ASD ID/DD	2	synonymous SNV,nonsynonymous SNV	6p12.3	tudor domain containing 6	protein-coding	0	0	0	0	0	0	0	0	0	0	0	0	0	0	0	0	1	0	0	0	0	0	0
55631	LRRC40	ASD ID/DD	2	nonsynonymous SNV,stopgain	1p31.1	leucine rich repeat containing 40	protein-coding	1	0	0	0	0	0	0	0	0	0	0	0	0	0	0	0	0	1	0	0	0	0	0
64344	HIF3A	ASD ID/DD	4	synonymous SNV,nonsynonymous SNV	19q13.32	hypoxia inducible factor 3 alpha subunit	protein-coding	0	0	1	0	0	0	0	0	0	0	0	0	0	0	0	0	0	0	0	0	0	0	0
152831	KLB	ASD ID/DD	4	synonymous SNV,frameshift insertion,nonsynonymous SNV	4p14	klotho beta	protein-coding	0	0	0	0	0	0	0	0	0	0	0	0	0	0	0	0	0	0	0	0	0	0	0
7204	TRIO	ASD ID/DD	14	nonsynonymous SNV,frameshift deletion,synonymous SNV	5p15.2	trio Rho guanine nucleotide exchange factor	protein-coding	0	1	0	0	0	0	1	0	1	0	0	0	0	0	0	1	0	1	0	0	1	1	1
144699	FBXL14	ASD ID/DD	2	synonymous SNV,nonsynonymous SNV	12p13.33	F-box and leucine rich repeat protein 14	protein-coding	0	0	0	0	0	0	0	0	0	0	0	0	0	0	0	0	0	0	0	0	0	0	0
9862	MED24	ASD ID/DD	3	nonsynonymous SNV,synonymous SNV	17q21.1	mediator complex subunit 24	protein-coding	1	1	0	0	0	0	0	0	0	0	0	0	0	0	0	0	0	0	0	0	0	0	0
341208	HEPHL1	ASD ID/DD	2	nonsynonymous SNV	11q21	hephaestin like 1	protein-coding	0	0	0	0	0	0	0	0	0	0	0	0	0	0	0	0	0	0	0	0	0	0	0
285	ANGPT2	ASD ID/DD	2	nonsynonymous SNV	8p23.1	angiopoietin 2	protein-coding	0	1	0	0	0	0	0	0	0	0	0	0	0	0	0	0	0	0	0	0	0	0	0
7760	ZNF213	ASD ID/DD	2	nonsynonymous SNV	16p13.3	zinc finger protein 213	protein-coding	0	0	1	0	0	0	0	0	0	0	0	0	0	0	0	0	0	0	0	0	0	0	0
2194	FASN	ASD ID/DD	6	nonsynonymous SNV,splice-site mutation,synonymous SNV	17q25.3	fatty acid synthase	protein-coding	0	1	0	0	0	0	1	0	1	0	0	0	0	0	0	0	0	0	0	0	1	0	1
64854	USP46	ASD ID/DD	2	nonsynonymous SNV	4q12	ubiquitin specific peptidase 46	protein-coding	0	0	0	0	0	0	0	0	0	0	0	0	1	0	0	0	0	0	0	0	0	0	1
3836	KPNA1	ASD ID/DD	2	nonsynonymous SNV,nonframeshift deletion	3q21.1	karyopherin subunit alpha 1	protein-coding	1	0	0	0	0	0	0	0	0	0	0	0	0	0	0	0	0	1	0	0	0	0	1
22915	MMRN1	ASD ID/DD	2	nonsynonymous SNV	4q22.1	multimerin 1	protein-coding	0	0	0	0	0	0	0	0	0	0	0	0	0	0	0	0	0	0	0	0	0	0	0
9908	G3BP2	ASD ID/DD	3	nonsynonymous SNV	4q21.1	G3BP stress granule assembly factor 2	protein-coding	0	0	0	0	0	0	0	1	1	0	0	0	0	0	0	0	0	0	0	0	0	0	1
84532	ACSS1	ASD ID/DD	4	synonymous SNV,stopgain	20p11.21	acyl-CoA synthetase short chain family member 1	protein-coding	0	0	0	0	0	0	0	0	0	0	0	0	1	0	0	0	0	0	0	0	0	0	0
27352	SGSM3	ASD ID/DD	4	nonsynonymous SNV,frameshift deletion,synonymous SNV	22q13.1	small G protein signaling modulator 3	protein-coding	1	0	0	0	0	0	0	0	0	0	0	0	0	0	0	0	0	0	0	0	0	0	0
5930	RBBP6	ASD ID/DD	4	synonymous SNV,nonsynonymous SNV	16p12.1	RB binding protein 6, ubiquitin ligase	protein-coding	0	1	0	0	0	0	0	0	0	0	0	0	0	0	0	0	0	1	0	0	0	0	1
8455	ATRN	ASD ID/DD	2	synonymous SNV,nonsynonymous SNV	20p13	attractin	protein-coding	1	0	0	0	0	0	0	0	0	0	0	0	1	0	0	0	0	0	0	0	0	0	1
1375	CPT1B	ASD ID/DD	3	nonsynonymous SNV,synonymous SNV	22q13.33	carnitine palmitoyltransferase 1B	protein-coding	0	1	0	0	0	0	0	0	0	0	0	0	0	0	0	0	0	0	0	0	0	0	0
113246	C12orf57	ASD ID/DD	2	synonymous SNV,nonsynonymous SNV	12p13.31	chromosome 12 open reading frame 57	protein-coding	1	0	0	0	0	0	0	0	1	0	0	0	0	0	0	0	0	1	0	0	0	0	0
26094	DCAF4	ASD ID/DD	2	nonsynonymous SNV	14q24.2	DDB1 and CUL4 associated factor 4	protein-coding	0	0	0	0	0	0	0	0	0	0	0	0	0	0	0	0	0	0	0	0	0	0	0
9918	NCAPD2	ASD ID/DD	2	nonsynonymous SNV	12p13.31	non-SMC condensin I complex subunit D2	protein-coding	0	0	0	0	0	0	0	0	0	0	0	0	0	0	0	0	0	1	0	0	0	0	0
94025	MUC16	ASD ID/DD	11	nonsynonymous SNV,synonymous SNV	19p13.2	mucin 16, cell surface associated	protein-coding	0	0	0	0	0	0	0	0	0	0	0	0	0	0	0	0	0	0	0	0	0	0	0
1767	DNAH5	ASD ID/DD	7	nonsynonymous SNV,frameshift deletion,synonymous SNV	5p15.2	dynein axonemal heavy chain 5	protein-coding	0	1	0	0	0	0	0	0	0	0	0	0	1	0	0	0	0	0	1	0	0	0	0
64092	SAMSN1	ASD ID/DD	2	nonsynonymous SNV	21q11.2	SAM domain, SH3 domain and nuclear localization signals 1	protein-coding	0	0	0	0	0	0	0	0	0	0	0	0	0	0	0	0	0	0	0	0	0	0	0
149628	PYHIN1	ASD ID/DD	4	nonsynonymous SNV,stopgain	1q23.1	pyrin and HIN domain family member 1	protein-coding	0	0	0	0	0	0	0	0	0	0	0	0	0	0	0	0	0	0	0	0	0	0	0
55669	MFN1	ASD ID/DD	3	nonsynonymous SNV,nonframeshift deletion	3q26.33	mitofusin 1	protein-coding	1	1	0	0	0	0	0	0	0	0	0	0	0	0	0	0	0	0	0	0	0	0	0
4036	LRP2	ASD ID/DD	9	stopgain,nonsynonymous SNV,synonymous SNV,frameshift deletion	2q31.1	LDL receptor related protein 2	protein-coding	0	1	0	0	0	0	0	0	0	0	0	0	1	0	0	0	0	0	1	0	0	0	1
11119	BTN3A1	ASD ID/DD	2	synonymous SNV,nonsynonymous SNV	6p22.2	butyrophilin subfamily 3 member A1	protein-coding	0	0	0	0	0	0	0	0	0	0	0	0	0	0	0	0	0	0	0	0	0	0	0
54827	NXPE4	ASD ID/DD	3	nonsynonymous SNV,frameshift deletion	11q23.2	neurexophilin and PC-esterase domain family member 4	protein-coding	0	0	0	0	0	0	0	0	0	0	0	0	0	0	0	0	0	0	0	0	0	0	0
340533	NEXMIF	ASD ID/DD	6	nonsynonymous SNV,stopgain,frameshift insertion	Xq13.3	neurite extension and migration factor	protein-coding	0	0	0	0	0	0	0	0	0	0	0	0	0	0	0	0	0	0	1	0	0	0	1
23120	ATP10B	ASD ID/DD	3	nonsynonymous SNV	5q34	ATPase phospholipid transporting 10B (putative)	protein-coding	0	0	0	0	0	0	0	0	0	0	0	0	0	0	0	0	0	0	0	0	0	0	0
114792	KLHL32	ASD ID/DD	2	synonymous SNV	6q16.1	kelch like family member 32	protein-coding	0	0	0	0	0	0	0	0	0	0	0	0	0	0	0	0	0	0	0	0	0	0	0
57555	NLGN2	ASD ID/DD	4	nonsynonymous SNV	17p13.1	neuroligin 2	protein-coding	0	0	0	0	1	0	1	1	1	0	0	0	0	0	0	0	0	0	0	0	0	0	1
116449	CLNK	ASD ID/DD	2	nonsynonymous SNV	4p16.1	cytokine dependent hematopoietic cell linker	protein-coding	0	0	0	0	0	0	0	0	0	0	0	0	0	0	0	0	0	0	0	0	0	0	0
26027	ACOT11	ASD ID/DD	2	nonsynonymous SNV	1p32.3	acyl-CoA thioesterase 11	protein-coding	0	0	0	0	0	0	0	0	0	0	0	0	1	0	0	0	0	0	0	0	0	0	0
83889	WDR87	ASD ID/DD	4	nonsynonymous SNV,frameshift deletion	19q13.13	WD repeat domain 87	protein-coding	0	0	0	0	0	0	0	0	0	0	0	0	0	0	0	0	0	0	0	0	0	0	0
4604	MYBPC1	ASD ID/DD	2	nonsynonymous SNV,synonymous SNV	12q23.2	myosin binding protein C, slow type	protein-coding	0	0	0	0	0	0	0	1	0	0	0	0	0	0	0	0	0	0	0	0	0	0	0
10985	GCN1	ASD ID/DD	3	nonsynonymous SNV,synonymous SNV	12q24.23	GCN1, eIF2 alpha kinase activator homolog	protein-coding	0	0	0	0	0	0	1	0	0	0	0	0	0	0	0	0	0	0	0	0	0	0	1
23250	ATP11A	ASD ID/DD	2	nonsynonymous SNV	13q34	ATPase phospholipid transporting 11A	protein-coding	0	0	0	0	0	0	0	0	0	0	0	0	0	0	0	0	0	0	0	0	0	0	1
22841	RAB11FIP2	ASD ID/DD	2	nonsynonymous SNV,synonymous SNV	10q26.11	RAB11 family interacting protein 2	protein-coding	0	0	0	0	0	0	0	0	1	0	0	0	0	0	0	0	0	0	0	0	0	0	1
57537	SORCS2	ASD ID/DD	3	synonymous SNV,nonsynonymous SNV	4p16.1	sortilin related VPS10 domain containing receptor 2	protein-coding	0	0	0	0	0	0	0	0	0	0	0	0	0	0	0	0	0	0	0	0	0	0	0
57608	JCAD	ASD ID/DD	3	nonsynonymous SNV,splice-site mutation	10p11.23	junctional cadherin 5 associated	protein-coding	0	0	0	0	0	0	0	0	0	0	0	0	0	0	0	0	0	0	0	0	0	0	0
80230	RUFY1	ASD ID/DD	2	nonsynonymous SNV	5q35.3	RUN and FYVE domain containing 1	protein-coding	1	0	0	0	0	0	0	0	0	0	0	0	0	0	0	0	0	0	0	0	0	0	0
9351	SLC9A3R2	ASD ID/DD	2	nonsynonymous SNV	16p13.3	SLC9A3 regulator 2	protein-coding	0	0	0	0	0	0	0	0	0	0	0	0	0	0	0	0	0	0	0	0	0	0	0
5621	PRNP	ASD ID/DD	2	nonsynonymous SNV,synonymous SNV	20p13	prion protein	protein-coding	0	0	0	0	0	0	0	0	1	0	0	0	1	1	0	0	0	0	0	0	0	0	0
26155	NOC2L	ASD ID/DD	3	nonsynonymous SNV,nonframeshift deletion	1p36.33	NOC2 like nucleolar associated transcriptional repressor	protein-coding	1	0	0	0	0	0	0	0	0	0	0	0	0	0	0	0	0	0	0	0	0	0	0
221322	TBC1D32	ASD ID/DD	3	synonymous SNV,nonsynonymous SNV	6q22.31	TBC1 domain family member 32	protein-coding	0	0	0	0	0	0	0	0	0	0	0	0	0	0	0	0	0	0	0	0	0	0	0
6123	RPL3L	ASD ID/DD	2	synonymous SNV,nonsynonymous SNV	16p13.3	ribosomal protein L3 like	protein-coding	0	0	0	0	0	0	0	0	0	0	0	0	0	0	0	0	0	0	0	0	0	0	0
3683	ITGAL	ASD ID/DD	2	nonsynonymous SNV	16p11.2	integrin subunit alpha L	protein-coding	0	0	0	0	1	0	0	0	0	0	0	0	0	0	0	0	0	0	0	0	0	0	0
27303	RBMS3	ASD ID/DD	2	nonsynonymous SNV,synonymous SNV	3p24.1	RNA binding motif single stranded interacting protein 3	protein-coding	0	0	0	0	0	0	0	0	0	0	0	0	0	0	0	0	0	0	0	0	0	0	0
4772	NFATC1	ASD ID/DD	4	splice-site mutation,nonsynonymous SNV,synonymous SNV	18q23	nuclear factor of activated T-cells 1	protein-coding	0	1	0	0	0	0	0	0	0	0	0	0	0	0	0	0	0	0	0	0	0	0	1
9958	USP15	ASD ID/DD	3	frameshift insertion,splice-site mutation,nonsynonymous SNV	12q14.1	ubiquitin specific peptidase 15	protein-coding	0	0	0	0	0	0	0	0	0	0	0	0	0	0	0	0	0	0	0	0	0	0	1
114783	LMTK3	ASD ID/DD	2	nonframeshift insertion,nonframeshift deletion	19q13.33	lemur tyrosine kinase 3	protein-coding	0	0	0	0	0	0	1	0	0	0	0	0	0	0	0	0	0	0	0	0	0	0	0
253461	ZBTB38	ASD ID/DD	3	nonsynonymous SNV,synonymous SNV	3q23	zinc finger and BTB domain containing 38	protein-coding	0	0	1	0	0	0	0	0	0	0	0	0	0	0	0	0	0	0	0	0	1	0	1
80144	FRAS1	ASD ID/DD	4	nonsynonymous SNV,synonymous SNV	4q21.21	Fraser extracellular matrix complex subunit 1	protein-coding	0	1	0	0	0	0	0	0	0	0	0	0	0	0	0	0	0	0	1	0	0	0	0
56896	DPYSL5	ASD ID/DD	4	nonsynonymous SNV	2p23.3	dihydropyrimidinase like 5	protein-coding	0	0	0	0	0	0	0	0	1	0	0	0	1	0	0	0	0	1	0	0	0	0	1
27006	FGF22	ASD ID/DD	2	nonsynonymous SNV,synonymous SNV	19p13.3	fibroblast growth factor 22	protein-coding	0	0	0	0	0	0	0	0	0	0	0	0	1	0	0	0	0	0	0	0	0	0	0
57125	PLXDC1	ASD ID/DD	2	nonsynonymous SNV	17q12	plexin domain containing 1	protein-coding	0	0	0	0	0	0	0	0	0	0	0	0	0	0	0	0	0	0	0	0	0	0	0
6934	TCF7L2	ASD ID/DD	7	splice-site mutation,nonsynonymous SNV,stopgain,synonymous SNV	10q25.2-q25.3	transcription factor 7 like 2	protein-coding	0	1	1	0	0	0	0	1	0	0	0	0	1	0	0	0	0	0	1	1	0	1	1
57716	PRX	ASD ID/DD	2	synonymous SNV,nonsynonymous SNV	19q13.2	periaxin	protein-coding	0	0	0	0	0	0	0	0	0	0	0	0	1	0	1	0	0	0	0	0	0	0	0
118611	C10orf90	ASD ID/DD	4	synonymous SNV,frameshift insertion,nonsynonymous SNV	10q26.2	chromosome 10 open reading frame 90	protein-coding	0	0	0	0	0	0	0	0	0	0	0	0	0	0	0	0	0	0	0	0	0	0	0
163702	IFNLR1	ASD ID/DD	2	nonsynonymous SNV	1p36.11	interferon lambda receptor 1	protein-coding	0	0	0	0	0	0	0	0	0	0	0	0	0	0	0	0	0	0	0	0	0	0	0
5365	PLXNB3	ASD ID/DD	3	nonsynonymous SNV	Xq28	plexin B3	protein-coding	0	0	0	0	1	0	0	0	0	0	0	0	0	0	0	0	0	0	0	0	0	0	0
55607	PPP1R9A	ASD ID/DD	2	nonsynonymous SNV	7q21.3	protein phosphatase 1 regulatory subunit 9A	protein-coding	0	0	0	0	0	1	0	1	1	0	0	0	1	1	0	0	0	0	0	0	0	0	0
4940	OAS3	ASD ID/DD	2	synonymous SNV,nonsynonymous SNV	12q24.13	2'-5'-oligoadenylate synthetase 3	protein-coding	0	0	0	0	0	0	0	0	0	0	0	0	0	0	0	0	0	0	0	0	0	0	0
124222	PAQR4	ASD ID/DD	2	synonymous SNV	16p13.3	progestin and adipoQ receptor family member 4	protein-coding	0	0	0	0	0	0	0	0	0	0	0	0	0	0	0	0	0	0	0	0	0	0	0
1857	DVL3	ASD ID/DD	2	frameshift insertion,frameshift deletion	3q27.1	dishevelled segment polarity protein 3	protein-coding	1	1	0	0	0	0	0	0	0	0	0	0	0	0	0	0	0	1	0	0	0	0	1
9156	EXO1	ASD ID/DD	2	synonymous SNV,nonsynonymous SNV	1q43	exonuclease 1	protein-coding	0	0	0	0	0	0	0	0	0	0	0	0	0	0	0	0	0	1	0	0	0	0	0
10562	OLFM4	ASD ID/DD	2	nonsynonymous SNV	13q14.3	olfactomedin 4	protein-coding	0	0	0	0	1	0	0	0	0	0	0	0	0	0	0	0	0	0	0	0	0	0	0
9635	CLCA2	ASD ID/DD	3	nonsynonymous SNV	1p22.3	chloride channel accessory 2	protein-coding	0	0	0	0	0	0	0	0	0	0	0	0	0	0	0	0	0	0	0	0	0	0	0
50488	MINK1	ASD ID/DD	2	nonsynonymous SNV	17p13.2	misshapen like kinase 1	protein-coding	0	0	0	0	0	0	1	0	1	0	0	0	0	0	0	0	0	0	0	0	0	0	1
56996	SLC12A9	ASD ID/DD	3	nonsynonymous SNV,synonymous SNV	7q22.1	solute carrier family 12 member 9	protein-coding	0	0	0	0	0	0	0	0	0	0	0	0	0	0	0	0	0	0	0	0	0	0	0
55070	DET1	ASD ID/DD	2	synonymous SNV,nonsynonymous SNV	15q26.1	de-etiolated homolog 1 (Arabidopsis)	protein-coding	0	0	0	0	0	0	0	0	0	0	0	0	0	0	0	0	0	1	0	0	0	0	0
23090	ZNF423	ASD ID/DD	5	nonsynonymous SNV,synonymous SNV	16q12.1	zinc finger protein 423	protein-coding	0	1	1	0	0	0	0	0	0	0	0	0	1	0	0	0	0	0	0	0	1	0	1
89766	UMODL1	ASD ID/DD	4	frameshift deletion,nonsynonymous SNV,synonymous SNV	21q22.3	uromodulin like 1	protein-coding	0	0	0	0	1	0	0	0	0	0	0	0	0	0	0	0	0	0	0	0	0	0	0
6663	SOX10	ASD ID/DD	2	nonsynonymous SNV	22q13.1	SRY-box 10	protein-coding	0	1	1	0	0	0	0	0	0	0	0	0	0	0	0	0	0	0	1	0	0	0	1
9416	DDX23	ASD ID/DD	3	nonsynonymous SNV	12q13.12	DEAD-box helicase 23	protein-coding	1	0	0	0	0	0	0	0	0	0	0	0	0	0	0	0	0	1	0	0	0	0	1
85440	DOCK7	ASD ID/DD	3	nonsynonymous SNV	1p31.3	dedicator of cytokinesis 7	protein-coding	0	0	0	0	0	0	0	1	1	0	0	0	1	0	0	0	0	1	1	0	0	0	0
2200	FBN1	ASD ID/DD	7	nonsynonymous SNV,synonymous SNV,stopgain	15q21.1	fibrillin 1	protein-coding	0	1	0	0	0	0	0	0	0	0	0	0	1	0	0	0	0	0	1	0	1	0	1
23036	ZNF292	ASD ID/DD	5	stopgain,frameshift deletion,nonsynonymous SNV	6q14.3	zinc finger protein 292	protein-coding	0	0	1	0	0	0	0	0	0	0	0	0	0	0	0	0	0	0	0	0	1	1	1
5023	P2RX1	ASD ID/DD	2	nonsynonymous SNV	17p13.2	purinergic receptor P2X 1	protein-coding	0	0	0	0	0	0	0	0	0	0	0	0	0	0	0	0	0	0	0	0	0	0	0
85441	HELZ2	ASD ID/DD	5	nonsynonymous SNV,synonymous SNV	20q13.33	helicase with zinc finger 2	protein-coding	0	0	0	0	0	0	0	0	0	0	0	0	0	0	0	0	0	0	0	0	0	0	0
148870	CCDC27	ASD ID/DD	3	nonsynonymous SNV,frameshift insertion,synonymous SNV	1p36.32	coiled-coil domain containing 27	protein-coding	0	0	0	0	0	0	0	0	0	0	0	0	0	0	0	0	0	0	0	0	0	0	0
3660	IRF2	ASD ID/DD	3	synonymous SNV,nonsynonymous SNV	4q35.1	interferon regulatory factor 2	protein-coding	0	0	0	0	0	0	0	1	0	0	0	0	0	0	0	0	0	0	0	0	0	0	0
8997	KALRN	ASD ID/DD	5	synonymous SNV,nonsynonymous SNV,stopgain	3q21.1-q21.2	kalirin RhoGEF kinase	protein-coding	0	0	0	0	0	0	1	0	1	0	0	0	1	1	1	0	0	0	0	0	0	0	1
80262	C16orf70	ASD ID/DD	3	synonymous SNV,nonsynonymous SNV	16q22.1	chromosome 16 open reading frame 70	protein-coding	0	0	0	0	0	0	0	0	0	0	0	0	0	0	0	0	0	0	0	0	0	0	0
23328	SASH1	ASD ID/DD	3	nonsynonymous SNV	6q24.3-q25.1	SAM and SH3 domain containing 1	protein-coding	0	0	0	0	0	0	1	0	0	0	0	0	0	0	0	0	0	0	0	0	0	0	0
2972	BRF1	ASD ID/DD	2	nonsynonymous SNV	14q32.33	BRF1, RNA polymerase III transcription initiation factor subunit	protein-coding	1	0	0	0	0	0	0	0	0	0	0	0	0	0	0	0	0	0	0	0	0	0	0
84694	GJA10	ASD ID/DD	2	nonsynonymous SNV	6q15	gap junction protein alpha 10	protein-coding	0	0	0	0	0	0	0	0	0	0	0	0	0	0	0	0	0	0	0	0	0	0	0
2130	EWSR1	ASD ID/DD	2	synonymous SNV	22q12.2	EWS RNA binding protein 1	protein-coding	1	1	0	0	0	0	0	1	0	0	0	0	0	0	0	0	0	0	0	0	0	0	1
85358	SHANK3	ASD ID/DD	5	stopgain,frameshift deletion,frameshift insertion	22q13.33	SH3 and multiple ankyrin repeat domains 3	protein-coding	0	0	0	0	0	1	1	1	1	0	0	0	1	1	0	0	0	0	1	1	1	0	1
81545	FBXO38	ASD ID/DD	2	nonsynonymous SNV	5q32	F-box protein 38	protein-coding	1	0	0	0	0	0	0	0	0	0	0	0	0	0	0	0	0	0	0	0	0	0	1
84902	CEP89	ASD ID/DD	2	synonymous SNV,nonsynonymous SNV	19q13.11	centrosomal protein 89	protein-coding	0	0	0	0	0	0	0	0	0	0	0	0	0	0	0	0	0	1	0	0	0	0	0
2041	EPHA1	ASD ID/DD	2	nonsynonymous SNV,synonymous SNV	7q34-q35	EPH receptor A1	protein-coding	0	0	0	0	1	1	0	0	0	0	0	0	0	0	0	0	0	0	0	0	0	0	0
4548	MTR	ASD ID/DD	3	nonsynonymous SNV,synonymous SNV	1q43	5-methyltetrahydrofolate-homocysteine methyltransferase	protein-coding	0	1	0	0	0	0	0	0	0	0	0	0	0	0	0	0	0	0	1	0	0	0	0
27134	TJP3	ASD ID/DD	3	synonymous SNV,nonsynonymous SNV	19p13.3	tight junction protein 3	protein-coding	0	0	0	0	0	0	0	0	0	0	0	0	0	0	0	0	0	0	0	0	0	0	0
9611	NCOR1	ASD ID/DD	4	nonsynonymous SNV,splice-site mutation	17p12-p11.2	nuclear receptor corepressor 1	protein-coding	1	1	0	0	0	0	1	1	0	0	0	0	1	0	0	0	0	1	0	0	1	0	1
84464	SLX4	ASD ID/DD	3	nonsynonymous SNV	16p13.3	SLX4 structure-specific endonuclease subunit	protein-coding	0	1	0	0	0	0	0	0	0	0	0	0	0	0	0	0	0	0	1	0	0	0	0
50614	GALNT9	ASD ID/DD	2	nonsynonymous SNV	12q24.33	polypeptide N-acetylgalactosaminyltransferase 9	protein-coding	0	0	0	0	0	0	0	0	0	0	0	0	0	0	0	0	0	0	0	0	0	0	0
5676	PSG7	ASD ID/DD	2	synonymous SNV	19q13.31	pregnancy specific beta-1-glycoprotein 7 (gene/pseudogene)	protein-coding	0	0	0	0	0	0	0	0	0	0	0	0	0	0	0	0	0	0	0	0	0	0	0
9828	ARHGEF17	ASD ID/DD	3	synonymous SNV,nonsynonymous SNV	11q13.4	Rho guanine nucleotide exchange factor 17	protein-coding	0	0	0	0	0	0	1	0	0	0	0	0	0	0	0	0	0	0	0	0	0	0	1
9732	DOCK4	ASD ID/DD	2	nonsynonymous SNV,synonymous SNV	7q31.1	dedicator of cytokinesis 4	protein-coding	0	0	0	0	0	0	1	1	0	0	0	0	0	0	0	0	0	0	0	0	0	0	1
23476	BRD4	ASD ID/DD	4	nonframeshift deletion,nonsynonymous SNV,frameshift deletion	19p13.12	bromodomain containing 4	protein-coding	1	1	0	0	0	0	1	0	0	0	0	0	0	0	0	0	1	0	0	0	0	0	1
867	CBL	ASD ID/DD	5	nonsynonymous SNV,splice-site mutation	11q23.3	Cbl proto-oncogene	protein-coding	0	1	0	0	0	0	0	0	0	0	0	0	1	0	0	0	0	1	0	0	0	0	0
22832	CEP162	ASD ID/DD	2	nonsynonymous SNV	6q14.2-q14.3	centrosomal protein 162	protein-coding	0	0	0	0	0	0	0	0	0	0	0	0	0	0	0	0	0	0	0	0	0	0	0
80724	ACAD10	ASD ID/DD	3	nonsynonymous SNV	12q24.12	acyl-CoA dehydrogenase family member 10	protein-coding	0	0	0	0	0	0	0	0	0	0	0	0	0	0	0	0	0	0	0	0	0	0	0
673	BRAF	ASD ID/DD	7	nonsynonymous SNV	7q34	B-Raf proto-oncogene, serine/threonine kinase	protein-coding	0	1	0	0	0	1	0	0	0	0	0	0	1	0	0	1	0	0	0	0	0	0	1
57513	CASKIN2	ASD ID/DD	3	synonymous SNV,nonsynonymous SNV	17q25.1	CASK interacting protein 2	protein-coding	0	0	0	0	0	0	0	0	0	0	0	0	0	0	0	0	0	0	0	0	0	0	1
26058	GIGYF2	ASD ID/DD	5	nonsynonymous SNV,stopgain,synonymous SNV	2q37.1	GRB10 interacting GYF protein 2	protein-coding	0	1	0	0	0	0	0	0	0	0	0	0	1	0	0	0	0	1	0	0	1	1	1
7850	IL1R2	ASD ID/DD	2	synonymous SNV	2q11.2	interleukin 1 receptor type 2	protein-coding	0	0	0	0	0	0	0	0	0	0	0	0	0	0	0	0	0	0	0	0	0	0	0
89795	NAV3	ASD ID/DD	4	synonymous SNV,nonsynonymous SNV	12q21.2	neuron navigator 3	protein-coding	0	0	0	0	0	0	1	1	0	0	0	0	0	0	0	0	0	0	0	0	0	0	1
5314	PKHD1	ASD ID/DD	7	nonsynonymous SNV	6p12.3-p12.2	PKHD1, fibrocystin/polyductin	protein-coding	0	1	0	0	0	0	0	0	0	0	0	0	0	0	0	0	0	0	1	0	0	0	0
3784	KCNQ1	ASD ID/DD	2	synonymous SNV,nonsynonymous SNV	11p15.5-p15.4	potassium voltage-gated channel subfamily Q member 1	protein-coding	0	0	0	0	0	0	0	0	0	0	0	0	1	0	0	0	0	0	1	0	0	0	0
4542	MYO1F	ASD ID/DD	2	synonymous SNV	19p13.2	myosin IF	protein-coding	0	0	0	0	0	0	0	0	0	0	0	0	0	0	0	0	0	0	0	0	0	0	0
89932	PAPLN	ASD ID/DD	2	nonsynonymous SNV	14q24.2	papilin, proteoglycan like sulfated glycoprotein	protein-coding	0	0	0	0	0	0	0	0	0	0	0	0	0	0	0	0	0	0	0	0	0	0	0
79009	DDX50	ASD ID/DD	4	synonymous SNV,nonsynonymous SNV	10q22.1	DExD-box helicase 50	protein-coding	0	0	0	0	0	0	0	0	0	0	0	0	0	0	0	0	0	0	0	0	0	0	0
9096	TBX18	ASD ID/DD	2	nonsynonymous SNV,synonymous SNV	6q14.3	T-box 18	protein-coding	0	1	1	0	0	0	0	0	0	0	0	0	0	0	0	0	0	0	1	0	0	0	1
79705	LRRK1	ASD ID/DD	7	synonymous SNV,nonsynonymous SNV	15q26.3	leucine rich repeat kinase 1	protein-coding	0	0	0	0	0	0	0	0	0	0	0	0	0	0	0	0	0	0	0	0	0	0	0
3954	LETM1	ASD ID/DD	2	nonsynonymous SNV,synonymous SNV	4p16.3	leucine zipper and EF-hand containing transmembrane protein 1	protein-coding	1	0	0	0	0	0	0	0	1	0	0	0	0	0	0	0	0	0	0	0	0	0	0
284613	CYB561D1	ASD ID/DD	2	stopgain,nonsynonymous SNV	1p13.3	cytochrome b561 family member D1	protein-coding	0	0	0	0	0	0	0	0	0	0	0	0	0	0	0	0	0	0	0	0	0	0	0
57148	RALGAPB	ASD ID/DD	3	frameshift deletion,synonymous SNV,nonsynonymous SNV	20q11.23	Ral GTPase activating protein non-catalytic beta subunit	protein-coding	0	0	0	0	0	0	1	0	0	0	0	0	0	0	0	0	0	0	0	0	0	0	1
1186	CLCN7	ASD ID/DD	2	nonsynonymous SNV	16p13.3	chloride voltage-gated channel 7	protein-coding	1	1	0	0	0	0	0	0	0	0	0	0	1	0	0	0	0	0	1	0	1	0	1
79443	FYCO1	ASD ID/DD	2	nonsynonymous SNV	3p21.31	FYVE and coiled-coil domain containing 1	protein-coding	0	0	0	0	0	0	0	0	0	0	0	0	0	0	0	0	0	0	1	0	0	0	0
220001	VWCE	ASD ID/DD	3	nonsynonymous SNV,stopgain	11q12.2	von Willebrand factor C and EGF domains	protein-coding	0	0	0	0	0	0	0	0	0	0	0	0	0	0	0	0	0	0	0	0	0	0	0
4314	MMP3	ASD ID/DD	2	nonsynonymous SNV	11q22.2	matrix metallopeptidase 3	protein-coding	0	0	0	0	0	0	0	0	0	0	0	0	0	0	0	0	0	0	0	0	0	0	0
2580	GAK	ASD ID/DD	2	nonsynonymous SNV,frameshift insertion	4p16.3	cyclin G associated kinase	protein-coding	0	0	0	0	0	0	0	0	0	0	0	0	0	0	0	0	0	0	0	0	0	0	1
27183	VPS4A	ASD ID/DD	3	nonsynonymous SNV,nonframeshift deletion,stopgain	16q22.1	vacuolar protein sorting 4 homolog A	protein-coding	1	0	0	0	0	0	0	0	0	0	0	0	0	0	0	0	0	0	0	0	0	0	1
9429	ABCG2	ASD ID/DD	2	nonsynonymous SNV	4q22.1	ATP binding cassette subfamily G member 2 (Junior blood group)	protein-coding	0	0	0	0	0	0	0	0	0	0	0	0	0	0	0	0	0	0	0	0	0	0	0
120114	FAT3	ASD ID/DD	6	nonsynonymous SNV,nonframeshift deletion,synonymous SNV	11q14.3	FAT atypical cadherin 3	protein-coding	0	0	0	0	1	0	1	1	0	0	0	0	0	0	0	0	0	0	0	0	0	0	1
5211	PFKL	ASD ID/DD	2	frameshift insertion,synonymous SNV	21q22.3	phosphofructokinase, liver type	protein-coding	0	0	0	0	0	0	0	0	1	0	0	0	0	0	0	0	0	0	0	0	0	0	0
253769	WDR27	ASD ID/DD	2	nonsynonymous SNV,synonymous SNV	6q27	WD repeat domain 27	protein-coding	0	0	0	0	0	0	0	0	0	0	0	0	0	0	0	0	0	0	0	0	0	0	0
53832	IL20RA	ASD ID/DD	2	nonsynonymous SNV	6q23.3	interleukin 20 receptor subunit alpha	protein-coding	0	0	0	0	0	0	0	0	0	0	0	0	0	0	0	0	0	0	0	0	0	0	0
147495	APCDD1	ASD ID/DD	2	synonymous SNV,nonsynonymous SNV	18p11.22	APC down-regulated 1	protein-coding	0	0	0	0	0	0	0	0	0	0	0	0	0	0	0	0	0	0	0	0	0	0	0
221037	JMJD1C	ASD ID/DD	3	nonsynonymous SNV,frameshift insertion	10q21.3	jumonji domain containing 1C	protein-coding	0	0	0	0	0	0	0	0	0	0	0	0	0	0	0	0	1	1	0	0	1	0	1
5799	PTPRN2	ASD ID/DD	2	nonsynonymous SNV,synonymous SNV	7q36.3	protein tyrosine phosphatase, receptor type N2	protein-coding	0	0	0	0	0	0	1	0	0	0	0	0	0	0	0	0	0	0	0	0	0	0	0
57504	MTA3	ASD ID/DD	2	synonymous SNV	2p21	metastasis associated 1 family member 3	protein-coding	0	0	0	0	0	0	0	0	0	0	0	0	1	0	0	0	1	0	0	0	0	0	0
6597	SMARCA4	ASD ID/DD	12	nonsynonymous SNV	19p13.2	SWI/SNF related, matrix associated, actin dependent regulator of chromatin, subfamily a, member 4	protein-coding	1	1	0	0	0	0	1	0	0	0	0	0	0	0	0	0	1	1	1	0	1	0	1
57520	HECW2	ASD ID/DD	10	nonsynonymous SNV,frameshift deletion	2q32.3	HECT, C2 and WW domain containing E3 ubiquitin protein ligase 2	protein-coding	0	0	0	0	0	0	0	0	0	0	0	0	0	0	0	0	0	0	0	0	0	0	1
9466	IL27RA	ASD ID/DD	2	nonsynonymous SNV	19p13.12	interleukin 27 receptor subunit alpha	protein-coding	0	0	0	0	0	0	0	0	0	0	0	0	0	0	0	0	0	0	0	0	0	0	0
696	BTN1A1	ASD ID/DD	2	splice-site mutation,nonsynonymous SNV	6p22.2	butyrophilin subfamily 1 member A1	protein-coding	0	0	0	0	0	0	0	0	0	0	0	0	0	0	0	0	0	0	0	0	0	0	0
10849	CD3EAP	ASD ID/DD	2	nonframeshift insertion,synonymous SNV	19q13.32	CD3e molecule associated protein	protein-coding	0	0	0	0	0	0	0	0	0	0	0	0	0	0	0	0	0	0	0	0	0	0	0
57194	ATP10A	ASD ID/DD	4	nonsynonymous SNV,synonymous SNV	15q12	ATPase phospholipid transporting 10A (putative)	protein-coding	0	0	0	0	0	0	0	0	0	0	0	0	0	0	0	0	0	0	0	0	0	0	0
6339	SCNN1D	ASD ID/DD	4	stopgain,nonsynonymous SNV,synonymous SNV	1p36.33	sodium channel epithelial 1 delta subunit	protein-coding	0	0	0	0	0	0	0	0	0	0	0	0	0	0	0	0	0	0	0	0	0	0	0
129804	FBLN7	ASD ID/DD	2	synonymous SNV,nonsynonymous SNV	2q13-q14.1	fibulin 7	protein-coding	0	0	0	0	1	0	0	0	0	0	0	0	0	0	0	0	0	0	0	0	0	0	0
56886	UGGT1	ASD ID/DD	3	nonsynonymous SNV,nonframeshift deletion,frameshift deletion	2q14.3	UDP-glucose glycoprotein glucosyltransferase 1	protein-coding	0	0	0	0	0	0	0	1	0	0	0	0	0	0	0	0	0	1	0	0	0	0	0
10608	MXD4	ASD ID/DD	2	nonsynonymous SNV,synonymous SNV	4p16.3	MAX dimerization protein 4	protein-coding	1	0	1	0	0	0	0	0	0	0	0	0	0	0	0	0	0	0	0	0	0	0	0
6305	SBF1	ASD ID/DD	6	nonsynonymous SNV	22q13.33	SET binding factor 1	protein-coding	0	1	0	0	0	0	1	0	1	0	0	0	0	0	0	0	0	0	0	0	1	0	0
2038	EPB42	ASD ID/DD	2	nonsynonymous SNV	15q15.2	erythrocyte membrane protein band 4.2	protein-coding	0	0	0	0	0	0	0	0	0	0	0	0	0	0	0	0	0	0	0	0	0	0	0
9892	SNAP91	ASD ID/DD	2	nonsynonymous SNV	6q14.2	synaptosome associated protein 91	protein-coding	0	0	0	0	0	0	1	0	1	0	0	0	0	0	0	0	0	0	0	0	0	0	1
6238	RRBP1	ASD ID/DD	2	nonsynonymous SNV	20p12.1	ribosome binding protein 1	protein-coding	0	0	0	0	0	0	0	0	0	0	0	0	0	0	0	0	0	0	0	0	0	0	0
421	ARVCF	ASD ID/DD	2	stopgain,frameshift deletion	22q11.21	ARVCF, delta catenin family member	protein-coding	0	0	0	0	0	0	1	0	1	0	0	0	1	0	0	0	0	0	0	0	0	0	0
8125	ANP32A	ASD ID/DD	2	frameshift deletion,stopgain	15q23	acidic nuclear phosphoprotein 32 family member A	protein-coding	1	0	0	0	0	0	0	0	0	0	0	0	0	0	0	0	0	1	0	0	0	0	1
4644	MYO5A	ASD ID/DD	4	nonsynonymous SNV,synonymous SNV	15q21.2	myosin VA	protein-coding	0	1	0	0	0	0	1	0	1	0	1	0	1	0	0	0	0	0	1	0	0	0	1
271	AMPD2	ASD ID/DD	4	nonsynonymous SNV,synonymous SNV,frameshift insertion	1p13.3	adenosine monophosphate deaminase 2	protein-coding	0	0	0	0	0	0	0	0	0	0	0	0	0	0	0	0	0	0	1	0	0	0	0
23268	DNMBP	ASD ID/DD	5	nonsynonymous SNV,synonymous SNV	10q24.2	dynamin binding protein	protein-coding	0	0	0	0	0	0	0	0	0	0	0	0	0	0	0	0	0	0	0	0	0	0	0
9900	SV2A	ASD ID/DD	3	nonsynonymous SNV	1q21.2	synaptic vesicle glycoprotein 2A	protein-coding	0	1	0	0	0	0	1	0	1	0	0	0	1	0	0	1	0	0	0	0	0	0	0
13	AADAC	ASD ID/DD	2	nonsynonymous SNV,stopgain	3q25.1	arylacetamide deacetylase	protein-coding	0	0	0	0	0	0	0	0	0	0	0	0	0	0	0	0	0	0	0	0	0	0	0
7942	TFEB	ASD ID/DD	2	nonsynonymous SNV	6p21.1	transcription factor EB	protein-coding	0	1	1	0	0	0	0	0	0	0	0	0	0	0	0	0	0	0	0	0	0	0	1
32	ACACB	ASD ID/DD	6	frameshift insertion,synonymous SNV,nonsynonymous SNV	12q24.11	acetyl-CoA carboxylase beta	protein-coding	0	0	0	0	0	0	0	0	0	0	0	0	1	0	0	0	0	0	0	0	0	0	0
22979	EFR3B	ASD ID/DD	2	nonsynonymous SNV	2p23.3	EFR3 homolog B	protein-coding	0	0	0	0	0	0	0	0	1	0	0	0	0	0	0	0	0	0	0	0	0	0	0
6721	SREBF2	ASD ID/DD	2	synonymous SNV,nonframeshift substitution	22q13.2	sterol regulatory element binding transcription factor 2	protein-coding	1	1	1	0	0	0	1	0	0	0	0	0	0	0	0	0	0	0	0	0	0	0	1
9950	GOLGA5	ASD ID/DD	3	splice-site mutation,nonsynonymous SNV	14q32.12	golgin A5	protein-coding	1	0	0	0	0	0	0	0	0	0	0	0	0	0	0	0	0	0	0	0	1	0	0
2897	GRIK1	ASD ID/DD	2	nonsynonymous SNV	21q21.3	glutamate ionotropic receptor kainate type subunit 1	protein-coding	0	0	0	0	0	0	0	1	0	0	0	0	1	1	1	0	0	0	0	0	0	0	0
1303	COL12A1	ASD ID/DD	2	nonsynonymous SNV	6q13-q14.1	collagen type XII alpha 1 chain	protein-coding	0	1	0	0	0	0	0	0	0	0	0	0	0	0	0	0	0	0	0	0	0	0	1
1654	DDX3X	ASD ID/DD	37	splice-site mutation,frameshift deletion,frameshift insertion,nonframeshift deletion,nonsynonymous SNV,stopgain	Xp11.4	DEAD-box helicase 3, X-linked	protein-coding	1	0	0	0	0	0	0	0	1	0	0	0	0	0	0	0	0	0	1	1	0	1	1
63982	ANO3	ASD ID/DD	2	nonsynonymous SNV	11p14.3-p14.2	anoctamin 3	protein-coding	0	0	0	0	0	0	0	0	0	0	0	0	0	0	0	0	0	0	0	0	0	0	0
51773	RSF1	ASD ID/DD	2	nonsynonymous SNV	11q14.1	remodeling and spacing factor 1	protein-coding	0	0	0	0	0	0	0	0	0	0	0	0	0	0	0	0	1	1	0	0	0	0	1
2890	GRIA1	ASD ID/DD	4	nonsynonymous SNV	5q33.2	glutamate ionotropic receptor AMPA type subunit 1	protein-coding	0	0	0	0	0	0	0	0	1	0	0	0	1	1	0	0	0	0	0	0	0	0	1
7536	SF1	ASD ID/DD	7	nonsynonymous SNV,frameshift deletion	11q13.1	splicing factor 1	protein-coding	1	1	0	1	0	0	0	0	0	0	0	0	0	0	0	0	0	0	0	0	0	0	1
23154	NCDN	ASD ID/DD	2	nonsynonymous SNV	1p34.3	neurochondrin	protein-coding	0	1	0	0	0	0	1	0	1	0	0	0	0	0	0	0	0	0	0	0	0	0	1
11321	GPN1	ASD ID/DD	2	nonsynonymous SNV	2p23.3	GPN-loop GTPase 1	protein-coding	1	0	0	0	0	0	0	0	0	0	0	0	0	0	0	0	0	1	0	0	0	0	0
7450	VWF	ASD ID/DD	4	synonymous SNV	12p13.31	von Willebrand factor	protein-coding	0	0	0	0	0	0	0	0	0	0	0	0	0	0	0	0	0	0	0	0	0	0	0
55339	WDR33	ASD ID/DD	2	stopgain,nonsynonymous SNV	2q14.3	WD repeat domain 33	protein-coding	1	0	0	0	0	0	0	0	0	0	0	0	0	0	0	0	0	0	0	0	0	0	1
23457	ABCB9	ASD ID/DD	2	nonsynonymous SNV	12q24.31	ATP binding cassette subfamily B member 9	protein-coding	0	0	0	0	0	0	0	0	0	0	0	0	0	0	0	0	0	0	0	0	0	0	0
488	ATP2A2	ASD ID/DD	4	synonymous SNV,nonsynonymous SNV	12q24.11	ATPase sarcoplasmic/endoplasmic reticulum Ca2+ transporting 2	protein-coding	0	1	0	0	0	0	1	0	1	0	0	0	1	0	0	1	0	0	0	0	0	0	1
1012	CDH13	ASD ID/DD	3	nonsynonymous SNV,synonymous SNV	16q23.3	cadherin 13	protein-coding	0	0	0	0	1	0	0	0	1	0	0	0	0	0	0	0	0	0	0	0	0	0	0
81704	DOCK8	ASD ID/DD	3	frameshift deletion,nonsynonymous SNV,synonymous SNV	9p24.3	dedicator of cytokinesis 8	protein-coding	0	0	0	0	0	0	0	0	0	0	0	0	0	0	0	0	0	0	1	0	0	1	0
6328	SCN3A	ASD ID/DD	4	nonsynonymous SNV	2q24.3	sodium voltage-gated channel alpha subunit 3	protein-coding	0	1	0	0	0	0	0	1	0	0	0	0	1	0	0	0	0	1	0	0	0	0	1
4943	TBC1D25	ASD ID/DD	2	nonsynonymous SNV,synonymous SNV	Xp11.23	TBC1 domain family member 25	protein-coding	0	0	0	0	0	0	0	0	0	0	0	0	0	0	0	0	0	0	0	0	0	0	0
22795	NID2	ASD ID/DD	3	nonsynonymous SNV,synonymous SNV	14q22.1	nidogen 2	protein-coding	0	0	0	0	1	0	0	0	0	0	0	0	0	0	0	0	0	0	0	0	0	0	0
51588	PIAS4	ASD ID/DD	3	nonsynonymous SNV	19p13.3	protein inhibitor of activated STAT 4	protein-coding	0	1	0	0	0	0	0	0	0	0	0	0	0	0	0	0	0	0	0	0	0	0	1
10351	ABCA8	ASD ID/DD	3	nonsynonymous SNV	17q24.2	ATP binding cassette subfamily A member 8	protein-coding	0	0	0	0	0	0	0	0	0	0	0	0	0	0	0	0	0	0	0	0	0	0	0
2568	GABRP	ASD ID/DD	3	synonymous SNV,nonsynonymous SNV	5q35.1	gamma-aminobutyric acid type A receptor pi subunit	protein-coding	0	0	0	0	0	0	0	0	0	0	0	0	0	0	0	0	0	0	0	0	0	0	0
53373	TPCN1	ASD ID/DD	2	synonymous SNV,nonsynonymous SNV	12q24.13	two pore segment channel 1	protein-coding	1	0	0	0	0	0	0	0	0	0	0	0	0	0	0	0	0	0	0	0	0	0	0
126321	MFSD12	ASD ID/DD	2	nonsynonymous SNV	19p13.3	major facilitator superfamily domain containing 12	protein-coding	1	0	0	0	0	0	0	0	0	0	0	0	0	0	0	0	0	0	0	0	0	0	0
23101	MCF2L2	ASD ID/DD	3	nonsynonymous SNV,synonymous SNV	3q27.1	MCF.2 cell line derived transforming sequence-like 2	protein-coding	0	0	0	0	0	0	0	0	0	0	0	0	0	0	0	0	0	0	0	0	0	0	0
54870	QRICH1	ASD ID/DD	4	frameshift deletion,frameshift insertion,stopgain	3p21.31	glutamine rich 1	protein-coding	1	0	0	0	0	0	0	1	0	0	0	0	0	0	0	0	0	1	1	0	0	0	1
51163	DBR1	ASD ID/DD	2	nonsynonymous SNV,frameshift deletion	3q22.3	debranching RNA lariats 1	protein-coding	0	0	0	0	0	0	0	0	0	0	0	0	0	0	0	0	0	1	0	0	0	0	0
57493	HEG1	ASD ID/DD	3	nonsynonymous SNV	3q21.2	heart development protein with EGF like domains 1	protein-coding	0	1	0	0	0	0	0	0	0	0	0	0	0	0	0	0	0	0	0	0	0	0	0
8030	CCDC6	ASD ID/DD	2	nonsynonymous SNV	10q21.2	coiled-coil domain containing 6	protein-coding	0	0	0	0	0	0	0	0	0	0	0	0	0	0	0	0	0	0	0	0	0	0	1
133522	PPARGC1B	ASD ID/DD	2	nonsynonymous SNV,synonymous SNV	5q32	PPARG coactivator 1 beta	protein-coding	0	1	0	0	0	0	0	0	0	0	0	0	1	0	0	0	0	0	0	0	0	0	1
23258	DENND5A	ASD ID/DD	2	nonsynonymous SNV,synonymous SNV	11p15.4	DENN domain containing 5A	protein-coding	0	0	0	0	0	0	1	0	0	0	0	0	0	0	0	0	0	0	1	0	0	0	1
1457	CSNK2A1	ASD ID/DD	11	nonsynonymous SNV	20p13	casein kinase 2 alpha 1	protein-coding	0	1	0	0	0	0	0	0	0	0	0	0	0	0	0	0	0	1	0	0	0	0	1
1261	CNGA3	ASD ID/DD	3	nonsynonymous SNV	2q11.2	cyclic nucleotide gated channel alpha 3	protein-coding	0	0	0	0	0	0	0	0	0	0	0	0	0	0	0	0	0	0	0	0	0	0	0
64005	MYO1G	ASD ID/DD	3	nonsynonymous SNV	7p13	myosin IG	protein-coding	0	0	0	0	0	0	0	0	0	0	0	0	0	0	0	0	0	0	0	0	0	0	0
5145	PDE6A	ASD ID/DD	2	synonymous SNV,nonsynonymous SNV	5q32	phosphodiesterase 6A	protein-coding	0	0	0	0	0	0	0	0	0	0	0	0	0	0	0	0	0	0	0	0	0	0	0
142680	SLC34A3	ASD ID/DD	3	synonymous SNV	9q34.3	solute carrier family 34 member 3	protein-coding	0	0	0	0	0	0	0	0	0	0	0	0	0	0	0	0	0	0	0	0	0	0	0
10087	COL4A3BP	ASD ID/DD	10	nonsynonymous SNV,synonymous SNV	5q13.3	collagen type IV alpha 3 binding protein	protein-coding	0	1	0	0	0	0	0	1	0	0	0	0	0	0	0	0	0	0	0	0	0	1	1
23344	ESYT1	ASD ID/DD	2	nonsynonymous SNV,synonymous SNV	12q13.2	extended synaptotagmin 1	protein-coding	0	0	0	0	0	0	0	0	0	0	0	0	0	0	0	0	0	0	0	0	0	0	0
90134	KCNH7	ASD ID/DD	2	nonsynonymous SNV	2q24.2	potassium voltage-gated channel subfamily H member 7	protein-coding	0	0	0	0	0	0	1	1	0	0	0	0	0	0	0	0	0	0	0	0	0	0	1
7415	VCP	ASD ID/DD	3	frameshift deletion,nonframeshift deletion,nonsynonymous SNV	9p13.3	valosin containing protein	protein-coding	1	1	0	0	0	0	0	0	1	0	0	0	1	0	0	0	0	0	0	0	1	0	1
283248	RCOR2	ASD ID/DD	2	nonsynonymous SNV	11q13.1	REST corepressor 2	protein-coding	0	0	1	0	0	0	0	0	0	0	0	0	0	0	0	0	0	1	0	0	0	0	0
9311	ASIC3	ASD ID/DD	3	nonsynonymous SNV	7q36.1	acid sensing ion channel subunit 3	protein-coding	0	0	0	0	0	0	0	0	0	0	0	0	1	0	1	0	0	0	0	0	0	0	0
81050	OR5AC2	ASD ID/DD	3	nonsynonymous SNV,synonymous SNV	3q11.2	olfactory receptor family 5 subfamily AC member 2	protein-coding	0	0	0	0	0	0	0	0	0	0	0	0	0	0	0	0	0	0	0	0	0	0	0
65268	WNK2	ASD ID/DD	2	nonsynonymous SNV,synonymous SNV	9q22.31	WNK lysine deficient protein kinase 2	protein-coding	0	0	0	0	0	0	1	1	0	0	0	0	0	0	0	0	0	0	0	0	0	0	0
8841	HDAC3	ASD ID/DD	3	nonframeshift deletion,nonsynonymous SNV	5q31.3	histone deacetylase 3	protein-coding	1	1	0	0	0	0	0	0	0	0	0	0	1	0	0	0	1	1	0	0	0	0	1
221178	SPATA13	ASD ID/DD	2	frameshift deletion,nonsynonymous SNV	13q12.12	spermatogenesis associated 13	protein-coding	0	0	0	0	0	0	0	0	0	0	0	0	0	0	0	0	0	0	0	0	0	0	0
7025	NR2F1	ASD ID/DD	7	nonsynonymous SNV,stopgain,synonymous SNV	5q15	nuclear receptor subfamily 2 group F member 1	protein-coding	0	1	0	0	0	0	1	0	0	0	0	0	1	0	0	0	0	0	0	0	0	0	0
8632	DNAH17	ASD ID/DD	6	nonsynonymous SNV,stopgain	17q25.3	dynein axonemal heavy chain 17	protein-coding	0	0	0	0	0	0	0	0	0	0	0	0	0	0	0	0	0	0	0	0	0	0	0
135935	NOBOX	ASD ID/DD	4	synonymous SNV,nonsynonymous SNV	7q35	NOBOX oogenesis homeobox	protein-coding	0	0	1	0	0	0	0	0	0	0	0	0	0	0	0	0	0	0	0	0	0	0	0
9024	BRSK2	ASD ID/DD	5	nonframeshift deletion,splice-site mutation,nonsynonymous SNV,synonymous SNV	11p15.5	BR serine/threonine kinase 2	protein-coding	0	0	0	0	0	0	1	0	0	0	0	0	0	0	0	0	0	0	0	0	1	0	0
4915	NTRK2	ASD ID/DD	3	nonsynonymous SNV,synonymous SNV	9q21.33	neurotrophic receptor tyrosine kinase 2	protein-coding	0	1	0	0	0	0	1	0	1	0	0	0	1	1	0	0	0	0	0	0	0	0	1
10730	YME1L1	ASD ID/DD	2	synonymous SNV,splice-site mutation	10p12.1	YME1 like 1 ATPase	protein-coding	1	0	0	0	0	0	0	0	0	0	0	0	0	0	0	0	0	0	0	0	0	0	1
5604	MAP2K1	ASD ID/DD	5	nonsynonymous SNV	15q22.31	mitogen-activated protein kinase kinase 1	protein-coding	1	1	0	0	0	0	0	0	1	0	1	0	0	0	0	0	0	0	0	0	0	0	1
10021	HCN4	ASD ID/DD	2	nonsynonymous SNV	15q24.1	hyperpolarization activated cyclic nucleotide gated potassium channel 4	protein-coding	0	1	0	0	0	0	0	0	0	0	0	0	0	0	0	0	0	0	0	0	0	0	0
84678	KDM2B	ASD ID/DD	4	nonsynonymous SNV	12q24.31	lysine demethylase 2B	protein-coding	0	1	0	0	0	0	0	0	0	0	0	0	0	0	0	0	1	1	0	0	0	0	1
84188	FAR1	ASD ID/DD	2	synonymous SNV	11p15.3	fatty acyl-CoA reductase 1	protein-coding	0	0	0	0	0	0	0	0	0	0	0	0	0	0	0	0	0	0	1	0	0	0	0
5727	PTCH1	ASD ID/DD	2	synonymous SNV,nonsynonymous SNV	9q22.32	patched 1	protein-coding	0	1	0	0	0	0	1	0	0	0	0	0	1	0	0	0	0	0	1	0	0	0	1
53905	DUOX1	ASD ID/DD	3	nonsynonymous SNV,synonymous SNV	15q21.1	dual oxidase 1	protein-coding	0	0	0	0	0	0	0	0	0	0	0	0	0	0	0	0	0	0	0	0	0	0	0
476	ATP1A1	ASD ID/DD	3	nonsynonymous SNV,splice-site mutation	1p13.1	ATPase Na+/K+ transporting subunit alpha 1	protein-coding	0	1	0	0	0	0	1	0	0	0	0	0	1	0	0	1	0	0	0	0	1	0	1
146760	RTN4RL1	ASD ID/DD	2	nonsynonymous SNV,synonymous SNV	17p13.3	reticulon 4 receptor like 1	protein-coding	0	0	0	0	0	0	0	0	0	0	0	0	0	0	0	0	0	0	0	0	0	0	0
29925	GMPPB	ASD ID/DD	2	nonsynonymous SNV,synonymous SNV	3p21.31	GDP-mannose pyrophosphorylase B	protein-coding	0	0	0	0	0	0	0	0	0	0	0	0	0	0	0	0	0	0	0	0	0	0	0
83959	SLC4A11	ASD ID/DD	2	nonsynonymous SNV,synonymous SNV	20p13	solute carrier family 4 member 11	protein-coding	0	0	0	0	0	0	0	0	0	0	0	0	0	0	0	0	0	0	1	0	0	0	0
322	APBB1	ASD ID/DD	2	frameshift insertion,synonymous SNV	11p15.4	amyloid beta precursor protein binding family B member 1	protein-coding	0	0	0	0	0	0	1	0	0	0	0	0	1	0	0	0	0	0	0	0	0	0	1
575	ADGRB1	ASD ID/DD	2	stopgain,nonsynonymous SNV	8q24.3	adhesion G protein-coupled receptor B1	protein-coding	0	0	0	0	1	0	1	0	1	0	0	0	0	0	0	0	0	0	0	0	0	0	1
56897	WRNIP1	ASD ID/DD	2	nonsynonymous SNV	6p25.2	Werner helicase interacting protein 1	protein-coding	1	0	0	0	0	0	0	0	0	0	0	0	0	0	0	0	0	0	0	0	0	0	0
699	BUB1	ASD ID/DD	2	synonymous SNV,nonframeshift insertion	2q13	BUB1 mitotic checkpoint serine/threonine kinase	protein-coding	0	1	0	0	0	0	0	0	0	0	0	0	0	0	0	0	0	1	0	0	0	0	0
388743	CAPN8	ASD ID/DD	3	unknown	1q41	calpain 8	protein-coding	0	0	0	0	0	0	0	0	0	0	0	0	0	0	0	0	0	0	0	0	0	0	0
219681	ARMC3	ASD ID/DD	2	nonsynonymous SNV	10p12.2	armadillo repeat containing 3	protein-coding	0	0	0	0	0	0	0	0	0	0	0	0	0	0	0	0	0	0	0	0	0	0	0
84083	ZRANB3	ASD ID/DD	3	nonsynonymous SNV,stopgain	2q21.3	zinc finger RANBP2-type containing 3	protein-coding	0	0	0	0	0	0	0	0	0	0	0	0	0	0	0	0	0	0	0	0	0	0	0
50613	UBQLN3	ASD ID/DD	2	nonsynonymous SNV	11p15.4	ubiquilin 3	protein-coding	0	0	0	0	0	0	0	0	0	0	0	0	0	0	0	0	0	0	0	0	0	0	0
85452	CFAP74	ASD ID/DD	3	nonsynonymous SNV,frameshift deletion	1p36.33	cilia and flagella associated protein 74	protein-coding	0	0	0	0	0	0	0	0	0	0	0	0	0	0	0	0	0	0	0	0	0	0	0
10396	ATP8A1	ASD ID/DD	4	nonsynonymous SNV	4p13	ATPase phospholipid transporting 8A1	protein-coding	0	0	0	0	0	0	0	1	0	0	0	0	1	0	0	0	0	0	0	0	0	0	1
10395	DLC1	ASD ID/DD	6	nonsynonymous SNV,synonymous SNV	8p22	DLC1 Rho GTPase activating protein	protein-coding	0	1	0	0	0	1	1	0	0	0	0	0	0	0	0	0	0	0	0	0	0	0	1
891	CCNB1	ASD ID/DD	3	synonymous SNV,nonsynonymous SNV	5q13.2	cyclin B1	protein-coding	0	1	0	0	0	0	0	0	0	0	0	0	0	0	0	0	0	1	0	0	0	0	0
57589	RIC1	ASD ID/DD	5	nonsynonymous SNV,synonymous SNV	9p24.1	RIC1 homolog, RAB6A GEF complex partner 1	protein-coding	0	0	0	0	0	0	0	0	0	0	0	0	1	0	0	0	0	0	0	0	0	0	0
143686	SESN3	ASD ID/DD	3	synonymous SNV,nonsynonymous SNV	11q21	sestrin 3	protein-coding	0	0	0	0	0	0	0	0	0	0	0	0	1	0	0	0	0	0	0	0	0	0	1
387787	LIPT2	ASD ID/DD	2	nonsynonymous SNV	11q13.4	lipoyl(octanoyl) transferase 2	protein-coding	0	0	0	0	0	0	0	0	0	0	0	0	0	0	0	0	0	0	0	0	0	0	0
63977	PRDM15	ASD ID/DD	2	nonsynonymous SNV,synonymous SNV	21q22.3	PR/SET domain 15	protein-coding	0	0	1	0	0	0	0	0	0	0	0	0	0	0	0	0	0	0	0	0	0	0	0
259217	HSPA12A	ASD ID/DD	3	nonsynonymous SNV	10q25.3	heat shock protein family A (Hsp70) member 12A	protein-coding	0	0	0	0	0	0	0	0	1	0	0	0	0	0	0	1	0	0	0	0	0	0	1
10785	WDR4	ASD ID/DD	2	nonsynonymous SNV	21q22.3	WD repeat domain 4	protein-coding	0	0	0	0	0	0	0	0	0	0	0	0	0	0	0	0	0	0	0	0	0	0	0
64901	RANBP17	ASD ID/DD	5	frameshift deletion,stopgain,nonsynonymous SNV	5q35.1	RAN binding protein 17	protein-coding	0	0	0	0	0	0	0	0	0	0	0	0	0	0	0	0	0	0	0	0	0	0	0
57705	WDFY4	ASD ID/DD	4	nonsynonymous SNV,synonymous SNV	10q11.23	WDFY family member 4	protein-coding	0	0	0	0	0	0	0	0	0	0	0	0	0	0	0	0	0	0	0	0	0	0	0
1113	CHGA	ASD ID/DD	4	nonsynonymous SNV,synonymous SNV	14q32.12	chromogranin A	protein-coding	0	1	0	0	0	0	0	0	0	0	0	0	0	0	0	0	0	0	0	0	0	0	0
57462	MYORG	ASD ID/DD	3	unknown	9p13.3	myogenesis regulating glycosidase (putative)	protein-coding	0	0	0	0	0	0	0	0	0	0	0	0	0	0	0	0	0	0	0	0	0	0	0
164633	CABP7	ASD ID/DD	3	nonsynonymous SNV	22q12.2	calcium binding protein 7	protein-coding	0	0	0	0	0	0	0	0	0	0	0	0	0	0	0	0	0	0	0	0	0	0	0
200576	PIKFYVE	ASD ID/DD	4	nonsynonymous SNV,synonymous SNV	2q34	phosphoinositide kinase, FYVE-type zinc finger containing	protein-coding	0	1	0	0	0	0	1	0	0	0	0	0	1	0	0	0	0	0	0	0	0	0	1
10216	PRG4	ASD ID/DD	4	synonymous SNV,nonsynonymous SNV	1q31.1	proteoglycan 4	protein-coding	0	0	0	0	0	0	0	0	0	0	0	0	0	0	0	0	0	0	0	0	0	0	0
23387	SIK3	ASD ID/DD	4	frameshift insertion,synonymous SNV,nonsynonymous SNV	11q23.3	SIK family kinase 3	protein-coding	0	0	0	0	0	0	0	0	0	0	0	0	1	0	0	0	0	0	0	0	0	0	1
9786	KIAA0586	ASD ID/DD	2	nonsynonymous SNV	14q23.1	KIAA0586	protein-coding	0	1	0	0	0	0	0	0	0	0	0	0	0	0	0	0	0	1	1	0	0	0	0
126206	NLRP5	ASD ID/DD	4	nonsynonymous SNV,synonymous SNV	19q13.43	NLR family pyrin domain containing 5	protein-coding	0	0	0	0	0	0	0	0	0	0	0	0	0	0	0	0	0	0	0	0	0	0	0
5339	PLEC	ASD ID/DD	16	synonymous SNV,nonsynonymous SNV	8q24.3	plectin	protein-coding	0	1	0	0	0	0	1	0	1	0	0	0	0	0	1	0	0	0	1	0	0	0	0
55818	KDM3A	ASD ID/DD	5	stopgain,nonsynonymous SNV,synonymous SNV	2p11.2	lysine demethylase 3A	protein-coding	0	0	0	0	0	0	0	0	0	0	0	0	0	0	0	0	1	0	0	0	0	0	1
27153	ZNF777	ASD ID/DD	2	nonsynonymous SNV	7q36.1	zinc finger protein 777	protein-coding	1	0	1	0	0	0	0	0	0	0	0	0	0	0	0	0	0	0	0	0	0	0	1
10716	TBR1	ASD ID/DD	5	frameshift deletion,nonsynonymous SNV,frameshift insertion	2q24.2	T-box, brain 1	protein-coding	0	1	1	0	0	0	0	0	0	0	0	0	1	0	0	0	0	0	1	0	1	1	1
7226	TRPM2	ASD ID/DD	3	nonsynonymous SNV,synonymous SNV	21q22.3	transient receptor potential cation channel subfamily M member 2	protein-coding	0	0	0	0	0	0	0	0	0	0	0	0	0	0	0	0	0	0	0	0	0	0	0
154810	AMOTL1	ASD ID/DD	3	splice-site mutation,synonymous SNV,nonsynonymous SNV	11q21	angiomotin like 1	protein-coding	0	0	0	0	0	0	0	0	0	0	0	0	0	0	0	0	0	0	0	0	0	0	0
5013	OTX1	ASD ID/DD	4	synonymous SNV,frameshift deletion,nonframeshift deletion,nonsynonymous SNV	2p15	orthodenticle homeobox 1	protein-coding	0	1	1	0	0	0	0	0	0	0	0	0	1	0	0	0	0	0	0	0	0	0	0
30000	TNPO2	ASD ID/DD	7	synonymous SNV,nonsynonymous SNV	19p13.13	transportin 2	protein-coding	0	0	0	0	0	0	1	0	0	0	0	0	0	0	0	0	0	0	0	0	0	0	1
57664	PLEKHA4	ASD ID/DD	3	nonsynonymous SNV	19q13.33	pleckstrin homology domain containing A4	protein-coding	0	0	0	0	0	0	0	0	0	0	0	0	0	0	0	0	0	0	0	0	0	0	0
84261	FBXW9	ASD ID/DD	2	nonsynonymous SNV	19p13.13	F-box and WD repeat domain containing 9	protein-coding	0	0	0	0	0	0	0	0	0	0	0	0	0	0	0	0	0	0	0	0	0	0	0
1953	MEGF6	ASD ID/DD	2	frameshift deletion,nonsynonymous SNV	1p36.32	multiple EGF like domains 6	protein-coding	0	0	0	0	0	0	0	0	0	0	0	0	0	0	0	0	0	0	0	0	0	0	0
57551	TAOK1	ASD ID/DD	5	nonframeshift deletion,nonsynonymous SNV	17q11.2	TAO kinase 1	protein-coding	0	0	0	0	0	0	1	0	0	0	0	0	0	0	0	0	0	0	0	0	0	0	1
51199	NIN	ASD ID/DD	4	frameshift deletion,stopgain,synonymous SNV	14q22.1	ninein	protein-coding	0	0	0	0	0	0	0	0	0	0	0	0	0	0	0	0	0	0	0	0	0	0	0
3308	HSPA4	ASD ID/DD	2	nonsynonymous SNV	5q31.1	heat shock protein family A (Hsp70) member 4	protein-coding	1	0	0	0	0	0	0	0	0	0	0	0	1	0	0	0	0	0	0	0	0	0	1
10607	TBL3	ASD ID/DD	3	stopgain,nonsynonymous SNV	16p13.3	transducin beta like 3	protein-coding	0	0	0	0	0	0	0	0	0	0	0	0	0	0	0	0	0	0	0	0	0	0	0
9909	DENND4B	ASD ID/DD	4	synonymous SNV,nonsynonymous SNV	1q21.3	DENN domain containing 4B	protein-coding	0	0	0	0	0	0	0	0	0	0	0	0	0	0	0	0	0	0	0	0	0	0	1
9839	ZEB2	ASD ID/DD	4	nonsynonymous SNV,frameshift deletion	2q22.3	zinc finger E-box binding homeobox 2	protein-coding	0	1	1	0	0	0	1	0	0	0	0	0	0	0	0	0	0	0	1	0	0	0	1
50650	ARHGEF3	ASD ID/DD	2	nonsynonymous SNV,synonymous SNV	3p14.3	Rho guanine nucleotide exchange factor 3	protein-coding	0	0	0	0	0	0	0	0	0	0	0	0	0	0	0	0	0	0	0	0	0	0	1
346673	STRA8	ASD ID/DD	2	synonymous SNV,nonsynonymous SNV	7q33	stimulated by retinoic acid 8	protein-coding	0	0	0	0	0	0	0	0	0	0	0	0	0	0	0	0	0	0	0	0	0	0	0
57758	SCUBE2	ASD ID/DD	3	stopgain,nonsynonymous SNV,synonymous SNV	11p15.4	signal peptide, CUB domain and EGF like domain containing 2	protein-coding	0	0	0	0	0	0	0	0	0	0	0	0	0	0	0	0	0	0	0	0	0	0	0
23008	KLHDC10	ASD ID/DD	2	stopgain,nonsynonymous SNV	7q32.2	kelch domain containing 10	protein-coding	0	0	0	0	0	0	0	0	0	0	0	0	0	0	0	0	0	0	0	0	0	0	1
5205	ATP8B1	ASD ID/DD	2	nonsynonymous SNV	18q21.31	ATPase phospholipid transporting 8B1	protein-coding	0	0	0	0	0	0	0	0	0	0	0	0	0	0	0	0	0	0	1	0	0	0	0
3184	HNRNPD	ASD ID/DD	2	splice-site mutation,frameshift deletion	4q21.22	heterogeneous nuclear ribonucleoprotein D	protein-coding	1	0	0	1	0	0	0	1	0	0	0	0	0	0	0	0	0	1	0	0	0	0	1
8573	CASK	ASD ID/DD	11	nonsynonymous SNV,splice-site mutation,stopgain,frameshift deletion	Xp11.4	calcium/calmodulin dependent serine protein kinase	protein-coding	0	1	0	0	0	0	0	1	1	0	0	1	1	0	0	1	0	1	1	0	0	1	1
22853	LMTK2	ASD ID/DD	3	nonsynonymous SNV	7q21.3	lemur tyrosine kinase 2	protein-coding	0	1	0	0	0	0	1	0	0	0	0	0	0	0	0	0	0	0	0	0	0	0	1
85369	STRIP1	ASD ID/DD	2	frameshift deletion,synonymous SNV	1p13.3	striatin interacting protein 1	protein-coding	1	0	0	0	0	0	0	0	0	0	0	0	0	0	0	0	0	1	0	0	0	0	0
23001	WDFY3	ASD ID/DD	6	stopgain,nonsynonymous SNV	4q21.23	WD repeat and FYVE domain containing 3	protein-coding	0	0	0	0	0	0	1	0	0	0	0	0	0	0	0	0	0	0	0	0	1	1	1
2011	MARK2	ASD ID/DD	3	synonymous SNV,nonsynonymous SNV	11q13.1	microtubule affinity regulating kinase 2	protein-coding	0	1	0	0	0	0	0	0	1	0	0	0	1	0	0	1	0	0	0	0	0	0	1
9901	SRGAP3	ASD ID/DD	4	nonsynonymous SNV,synonymous SNV	3p25.3	SLIT-ROBO Rho GTPase activating protein 3	protein-coding	0	0	0	0	0	0	1	0	0	0	0	0	1	0	0	0	0	0	0	0	1	0	1
5430	POLR2A	ASD ID/DD	4	nonsynonymous SNV,synonymous SNV,nonframeshift deletion	17p13.1	RNA polymerase II subunit A	protein-coding	1	1	0	0	0	0	1	0	0	0	0	0	0	0	0	0	0	0	0	0	1	0	1
9172	MYOM2	ASD ID/DD	2	synonymous SNV	8p23.3	myomesin 2	protein-coding	0	0	0	0	0	0	0	0	0	0	0	0	0	0	0	0	0	0	0	0	0	0	0
4763	NF1	ASD ID/DD	5	nonsynonymous SNV,stopgain	17q11.2	neurofibromin 1	protein-coding	0	1	0	0	0	0	1	0	1	0	0	0	1	0	0	0	0	0	1	0	0	0	1
29855	UBN1	ASD ID/DD	2	nonsynonymous SNV,synonymous SNV	16p13.3	ubinuclein 1	protein-coding	0	0	0	0	0	0	0	0	0	0	0	0	0	0	0	0	0	0	0	0	1	0	1
7841	MOGS	ASD ID/DD	2	nonsynonymous SNV,synonymous SNV	2p13.1	mannosyl-oligosaccharide glucosidase	protein-coding	1	0	0	0	0	0	0	0	1	0	0	0	0	0	0	0	0	0	0	0	0	0	0
55703	POLR3B	ASD ID/DD	2	synonymous SNV,nonsynonymous SNV	12q23.3	RNA polymerase III subunit B	protein-coding	0	0	0	0	0	0	0	0	0	0	0	0	0	0	0	0	0	0	1	0	0	0	0
56341	PRMT8	ASD ID/DD	2	nonsynonymous SNV,synonymous SNV	12p13.32	protein arginine methyltransferase 8	protein-coding	0	0	0	0	0	0	0	0	0	0	0	0	0	0	0	0	1	0	0	0	0	0	1
55293	UEVLD	ASD ID/DD	3	nonsynonymous SNV,synonymous SNV	11p15.1	UEV and lactate/malate dehyrogenase domains	protein-coding	1	0	0	0	0	0	0	0	0	0	0	0	0	0	0	0	0	0	0	0	0	0	0
347741	OTOP3	ASD ID/DD	2	nonsynonymous SNV	17q25.1	otopetrin 3	protein-coding	0	0	0	0	0	0	0	0	0	0	0	0	1	0	0	0	0	0	0	0	0	0	0
2742	GLRA2	ASD ID/DD	3	nonsynonymous SNV	Xp22.2	glycine receptor alpha 2	protein-coding	0	0	0	0	0	0	0	0	0	0	0	0	0	0	1	0	0	1	0	0	0	0	1
5705	PSMC5	ASD ID/DD	2	nonsynonymous SNV	17q23.3	proteasome 26S subunit, ATPase 5	protein-coding	1	0	0	0	0	0	0	0	0	0	0	0	0	0	0	0	0	0	0	0	0	0	1
22823	MTF2	ASD ID/DD	4	nonsynonymous SNV,nonframeshift deletion	1p22.1	metal response element binding transcription factor 2	protein-coding	0	1	0	0	0	0	0	0	0	0	0	0	0	0	0	0	1	1	0	0	0	0	1
5528	PPP2R5D	ASD ID/DD	18	frameshift deletion,nonsynonymous SNV	6p21.1	protein phosphatase 2 regulatory subunit B'delta	protein-coding	1	1	0	0	0	0	0	0	0	0	0	0	1	0	0	0	0	0	0	1	0	1	1
80025	PANK2	ASD ID/DD	2	nonsynonymous SNV,synonymous SNV	20p13	pantothenate kinase 2	protein-coding	1	0	0	0	0	0	0	0	0	0	0	0	1	0	0	0	0	0	0	0	0	0	0
283638	CEP170B	ASD ID/DD	3	nonsynonymous SNV	14q32.33	centrosomal protein 170B	protein-coding	0	0	0	0	0	0	1	0	1	0	0	0	0	0	0	0	0	0	0	0	0	0	0
9033	PKD2L1	ASD ID/DD	3	nonsynonymous SNV,frameshift deletion,synonymous SNV	10q24.31	polycystin 2 like 1, transient receptor potential cation channel	protein-coding	0	0	0	0	0	0	0	0	0	0	0	0	0	0	1	0	0	0	0	0	0	0	0
117583	PARD3B	ASD ID/DD	2	stopgain,nonsynonymous SNV	2q33.3	par-3 family cell polarity regulator beta	protein-coding	0	0	0	0	0	0	0	0	0	0	0	0	0	0	0	0	0	0	0	0	0	1	0
64409	GALNT17	ASD ID/DD	3	nonsynonymous SNV,synonymous SNV	7q11.22	polypeptide N-acetylgalactosaminyltransferase 17	protein-coding	0	0	0	0	0	0	0	0	0	0	0	0	0	0	0	0	0	0	0	0	0	0	0
10024	TROAP	ASD ID/DD	2	nonsynonymous SNV	12q13.12	trophinin associated protein	protein-coding	0	0	0	0	0	0	0	0	0	0	0	0	0	0	0	0	0	1	0	0	0	0	0
238	ALK	ASD ID/DD	4	synonymous SNV,nonsynonymous SNV	2p23.2-p23.1	ALK receptor tyrosine kinase	protein-coding	0	0	0	0	0	0	0	0	0	0	0	0	0	0	0	0	0	0	0	0	0	0	0
10514	MYBBP1A	ASD ID/DD	2	nonsynonymous SNV,synonymous SNV	17p13.2	MYB binding protein 1a	protein-coding	1	0	0	0	0	0	0	0	0	0	0	0	0	0	0	0	0	0	0	0	0	0	0
55833	UBAP2	ASD ID/DD	2	nonsynonymous SNV,synonymous SNV	9p13.3	ubiquitin associated protein 2	protein-coding	0	0	0	0	0	0	0	0	0	0	0	0	0	0	0	0	0	1	0	0	0	0	1
57538	ALPK3	ASD ID/DD	3	nonsynonymous SNV	15q25.3	alpha kinase 3	protein-coding	0	0	0	0	0	0	0	0	0	0	0	0	0	0	0	0	0	0	0	0	0	0	0
3760	KCNJ3	ASD ID/DD	2	nonframeshift deletion,nonsynonymous SNV	2q24.1	potassium voltage-gated channel subfamily J member 3	protein-coding	0	0	0	0	0	0	0	0	0	0	0	0	0	0	0	0	0	0	0	0	0	0	1
9869	SETDB1	ASD ID/DD	3	synonymous SNV,nonsynonymous SNV	1q21.3	SET domain bifurcated 1	protein-coding	1	1	0	0	0	0	0	0	0	0	0	0	0	0	0	0	1	1	0	0	0	0	1
4647	MYO7A	ASD ID/DD	2	synonymous SNV	11q13.5	myosin VIIA	protein-coding	0	0	0	0	0	0	0	0	0	0	0	0	1	0	1	0	0	0	1	0	0	0	0
54517	PUS7	ASD ID/DD	2	nonsynonymous SNV	7q22.3	pseudouridylate synthase 7 (putative)	protein-coding	1	0	0	0	0	0	0	1	0	0	0	0	0	0	0	0	0	0	0	0	0	0	0
23198	PSME4	ASD ID/DD	4	nonsynonymous SNV,synonymous SNV	2p16.2	proteasome activator subunit 4	protein-coding	0	0	0	0	0	0	0	0	0	0	0	0	0	0	0	0	0	0	0	0	0	0	1
4233	MET	ASD ID/DD	3	synonymous SNV,nonsynonymous SNV	7q31.2	MET proto-oncogene, receptor tyrosine kinase	protein-coding	0	1	0	0	0	1	0	0	0	0	0	0	1	0	0	0	0	0	0	0	0	0	1
10794	ZNF460	ASD ID/DD	3	nonsynonymous SNV	19q13.43	zinc finger protein 460	protein-coding	0	0	1	0	0	0	0	0	0	0	0	0	0	0	0	0	0	1	0	0	0	0	0
2916	GRM6	ASD ID/DD	2	nonsynonymous SNV	5q35.3	glutamate metabotropic receptor 6	protein-coding	0	0	0	0	0	0	0	0	0	0	0	0	0	0	0	0	0	0	1	0	0	0	0
23394	ADNP	ASD ID/DD	25	frameshift deletion,frameshift insertion,nonsynonymous SNV,stopgain	20q13.13	activity dependent neuroprotector homeobox	protein-coding	1	1	1	0	0	0	1	1	0	0	0	0	0	0	0	0	0	1	1	1	1	1	1
23122	CLASP2	ASD ID/DD	4	nonsynonymous SNV	3p22.3	cytoplasmic linker associated protein 2	protein-coding	0	0	0	0	0	1	1	1	1	0	0	0	0	0	0	1	0	0	0	0	0	0	1
23043	TNIK	ASD ID/DD	3	nonsynonymous SNV,synonymous SNV	3q26.2-q26.31	TRAF2 and NCK interacting kinase	protein-coding	0	0	0	0	0	0	1	1	1	0	0	0	1	0	0	0	0	0	0	0	0	0	1
79137	RETREG2	ASD ID/DD	2	nonsynonymous SNV,synonymous SNV	2q35	reticulophagy regulator family member 2	protein-coding	1	0	0	0	0	0	0	0	0	0	0	0	0	0	0	0	0	0	0	0	0	0	0
55188	RIC8B	ASD ID/DD	3	nonsynonymous SNV,synonymous SNV	12q23.3	RIC8 guanine nucleotide exchange factor B	protein-coding	0	0	0	0	0	0	0	0	0	0	0	0	0	0	0	0	0	0	0	0	0	0	1
64207	IRF2BPL	ASD ID/DD	4	nonsynonymous SNV,frameshift deletion	14q24.3	interferon regulatory factor 2 binding protein like	protein-coding	1	0	0	0	0	0	1	0	0	0	0	0	0	0	0	0	0	0	0	0	1	0	1
79070	KDELC1	ASD ID/DD	2	nonsynonymous SNV	13q33.1	KDEL motif containing 1	protein-coding	0	0	0	0	0	0	0	0	0	0	0	0	0	0	0	0	0	0	0	0	0	0	0
57337	SENP7	ASD ID/DD	2	nonsynonymous SNV	3q12.3	SUMO1/sentrin specific peptidase 7	protein-coding	0	0	0	0	0	0	0	0	0	0	0	0	0	0	0	0	0	1	0	0	0	0	1
9743	ARHGAP32	ASD ID/DD	5	nonsynonymous SNV,synonymous SNV	11q24.3	Rho GTPase activating protein 32	protein-coding	0	0	0	0	0	0	1	0	0	0	0	0	0	0	0	0	0	0	0	0	0	0	1
23654	PLXNB2	ASD ID/DD	6	nonframeshift deletion,nonsynonymous SNV,synonymous SNV	22q13.33	plexin B2	protein-coding	0	1	0	0	0	0	0	0	0	0	0	0	0	0	0	0	0	0	0	0	1	0	1
9641	IKBKE	ASD ID/DD	2	synonymous SNV,nonsynonymous SNV	1q32.1	inhibitor of nuclear factor kappa B kinase subunit epsilon	protein-coding	0	0	0	0	0	0	0	0	0	0	0	0	0	0	0	0	0	0	0	0	0	0	0
164	AP1G1	ASD ID/DD	2	nonsynonymous SNV	16q22.2	adaptor related protein complex 1 gamma 1 subunit	protein-coding	1	1	0	0	0	0	0	0	0	0	0	0	0	0	0	0	0	1	0	0	0	0	1
3897	L1CAM	ASD ID/DD	2	frameshift deletion,nonsynonymous SNV	Xq28	L1 cell adhesion molecule	protein-coding	0	1	0	0	1	0	0	0	1	0	0	0	1	0	0	0	0	1	1	0	1	0	1
7249	TSC2	ASD ID/DD	8	nonsynonymous SNV,synonymous SNV	16p13.3	TSC complex subunit 2	protein-coding	1	1	0	0	0	0	1	1	0	0	0	0	1	1	0	0	0	1	1	0	1	0	1
22878	TRAPPC8	ASD ID/DD	3	synonymous SNV,nonsynonymous SNV	18q12.1	trafficking protein particle complex 8	protein-coding	1	0	0	0	0	0	0	0	0	0	0	0	0	0	0	0	0	0	0	0	0	0	1
7290	HIRA	ASD ID/DD	3	nonsynonymous SNV,stopgain,synonymous SNV	22q11.21	histone cell cycle regulator	protein-coding	0	1	0	0	0	0	0	0	0	0	0	0	0	0	0	0	1	0	0	0	0	0	1
29775	CARD10	ASD ID/DD	2	nonsynonymous SNV	22q13.1	caspase recruitment domain family member 10	protein-coding	0	1	0	0	0	0	0	0	0	0	0	0	0	0	0	0	0	0	0	0	0	0	0
4054	LTBP3	ASD ID/DD	3	nonframeshift deletion,frameshift insertion,nonsynonymous SNV	11q13.1	latent transforming growth factor beta binding protein 3	protein-coding	0	0	0	0	0	0	0	0	0	0	0	0	1	0	0	0	0	0	1	0	0	0	1
4585	MUC4	ASD ID/DD	7	synonymous SNV,nonsynonymous SNV	3q29	mucin 4, cell surface associated	protein-coding	0	0	0	0	0	0	0	0	0	0	0	0	0	0	0	0	0	0	0	0	0	0	0
10411	RAPGEF3	ASD ID/DD	4	frameshift insertion,nonsynonymous SNV	12q13.11	Rap guanine nucleotide exchange factor 3	protein-coding	0	0	0	0	0	1	0	0	0	0	0	0	0	0	0	0	0	0	0	0	0	0	0
11319	ECD	ASD ID/DD	2	nonsynonymous SNV	10q22.2	ecdysoneless cell cycle regulator	protein-coding	1	1	0	0	0	0	0	0	0	0	0	0	0	0	0	0	0	0	0	0	0	0	0
23524	SRRM2	ASD ID/DD	11	synonymous SNV,frameshift deletion,nonsynonymous SNV,nonframeshift deletion,stopgain	16p13.3	serine/arginine repetitive matrix 2	protein-coding	0	0	0	0	0	0	1	0	0	0	0	0	0	0	0	0	0	1	0	0	1	0	0
27332	ZNF638	ASD ID/DD	4	nonsynonymous SNV,synonymous SNV	2p13.3-p13.2	zinc finger protein 638	protein-coding	1	0	0	0	0	0	0	0	0	0	0	0	0	0	0	0	0	0	0	0	0	0	1
23293	SMG6	ASD ID/DD	2	nonsynonymous SNV	17p13.3	SMG6, nonsense mediated mRNA decay factor	protein-coding	0	0	0	0	0	0	0	0	0	0	0	0	0	0	0	0	0	0	0	0	0	0	1
23113	CUL9	ASD ID/DD	3	nonsynonymous SNV	6p21.1	cullin 9	protein-coding	0	0	0	0	0	0	1	0	0	0	0	0	0	0	0	0	0	0	0	0	0	0	1
4774	NFIA	ASD ID/DD	3	stopgain,nonsynonymous SNV	1p31.3	nuclear factor I A	protein-coding	0	1	1	0	0	0	0	1	0	0	0	0	1	0	0	0	0	1	1	0	1	0	1
3752	KCND3	ASD ID/DD	4	nonsynonymous SNV	1p13.2	potassium voltage-gated channel subfamily D member 3	protein-coding	0	0	0	0	0	0	0	1	0	0	0	0	0	0	0	0	0	0	0	0	0	0	0
325	APCS	ASD ID/DD	2	synonymous SNV,frameshift insertion	1q23.2	amyloid P component, serum	protein-coding	0	0	0	0	0	0	0	0	0	0	0	0	0	0	0	0	0	0	0	0	0	0	0
6657	SOX2	ASD ID/DD	3	synonymous SNV,nonsynonymous SNV	3q26.33	SRY-box 2	protein-coding	0	1	1	0	0	0	0	0	0	0	0	0	1	0	1	0	0	0	1	0	0	0	0
5198	PFAS	ASD ID/DD	2	nonsynonymous SNV	17p13.1	phosphoribosylformylglycinamidine synthase	protein-coding	0	1	0	0	0	0	0	0	0	0	0	0	0	0	0	0	0	0	0	0	0	0	0
144132	DNHD1	ASD ID/DD	2	nonsynonymous SNV	11p15.4	dynein heavy chain domain 1	protein-coding	0	0	0	0	0	0	0	0	0	0	0	0	0	0	0	0	0	0	0	0	0	0	0
25758	KIAA1549L	ASD ID/DD	3	synonymous SNV,nonsynonymous SNV	11p13	KIAA1549 like	protein-coding	0	0	0	0	0	0	1	0	1	0	0	0	1	0	0	0	0	0	0	0	0	0	0
1660	DHX9	ASD ID/DD	2	nonsynonymous SNV	1q25.3	DExH-box helicase 9	protein-coding	1	1	0	0	0	0	0	0	0	0	0	0	0	0	0	0	0	1	0	0	0	0	1
114781	BTBD9	ASD ID/DD	2	stopgain,nonsynonymous SNV	6p21.2	BTB domain containing 9	protein-coding	0	0	0	0	0	0	0	0	0	0	0	0	1	1	0	0	0	0	0	0	0	0	0
23199	GSE1	ASD ID/DD	8	nonsynonymous SNV,synonymous SNV,frameshift deletion	16q24.1	Gse1 coiled-coil protein	protein-coding	0	0	0	0	0	0	0	0	0	0	0	0	1	0	0	0	0	0	0	0	1	0	0
7023	TFAP4	ASD ID/DD	2	nonsynonymous SNV	16p13.3	transcription factor AP-4	protein-coding	0	1	1	0	0	0	0	0	0	0	0	0	0	0	0	0	0	0	0	0	0	0	1
966	CD59	ASD ID/DD	2	nonsynonymous SNV	11p13	CD59 molecule (CD59 blood group)	protein-coding	0	0	0	0	0	0	0	0	1	0	0	0	0	0	0	0	0	0	0	0	0	0	0
2314	FLII	ASD ID/DD	6	nonsynonymous SNV,synonymous SNV	17p11.2	FLII, actin remodeling protein	protein-coding	0	1	1	0	0	0	0	0	0	0	0	0	0	0	0	0	0	0	0	0	0	0	0
1954	MEGF8	ASD ID/DD	5	nonsynonymous SNV,synonymous SNV	19q13.2	multiple EGF like domains 8	protein-coding	0	0	0	0	0	0	0	0	0	0	0	0	0	0	0	0	0	0	1	0	0	0	1
80208	SPG11	ASD ID/DD	3	nonsynonymous SNV	15q21.1	SPG11, spatacsin vesicle trafficking associated	protein-coding	1	0	0	0	0	0	0	0	0	0	0	0	0	0	0	0	0	0	1	0	0	0	0
440193	CCDC88C	ASD ID/DD	4	nonsynonymous SNV	14q32.11-q32.12	coiled-coil domain containing 88C	protein-coding	0	0	0	0	0	0	0	0	0	0	0	0	0	0	0	0	0	0	1	0	0	0	0
2767	GNA11	ASD ID/DD	2	synonymous SNV,nonsynonymous SNV	19p13.3	G protein subunit alpha 11	protein-coding	0	0	0	0	0	0	0	0	0	0	0	0	1	0	0	0	0	0	0	0	0	0	1
1778	DYNC1H1	ASD ID/DD	21	nonsynonymous SNV,stopgain,nonframeshift deletion	14q32.31	dynein cytoplasmic 1 heavy chain 1	protein-coding	0	1	0	0	0	0	1	0	1	0	0	0	1	0	0	0	0	0	0	0	1	0	1
1859	DYRK1A	ASD ID/DD	24	splice-site mutation,frameshift deletion,stopgain,frameshift insertion,nonsynonymous SNV	21q22.13	dual specificity tyrosine phosphorylation regulated kinase 1A	protein-coding	0	1	0	0	0	0	0	0	0	0	0	0	0	0	0	0	0	1	1	1	1	1	1
126868	MAB21L3	ASD ID/DD	2	synonymous SNV,nonsynonymous SNV	1p13.1	mab-21 like 3	protein-coding	0	0	0	0	0	0	0	0	0	0	0	0	0	0	0	0	0	0	0	0	0	0	0
22801	ITGA11	ASD ID/DD	3	synonymous SNV,nonsynonymous SNV	15q23	integrin subunit alpha 11	protein-coding	0	0	0	0	1	0	0	0	0	0	0	0	1	0	0	0	0	0	0	0	0	0	0
57670	KIAA1549	ASD ID/DD	3	nonsynonymous SNV	7q34	KIAA1549	protein-coding	0	0	0	0	0	0	0	0	0	0	0	0	0	0	0	0	0	1	0	0	0	0	1
54549	SDK2	ASD ID/DD	3	nonsynonymous SNV,synonymous SNV	17q25.1	sidekick cell adhesion molecule 2	protein-coding	0	0	0	0	1	0	0	0	0	0	0	0	0	0	0	0	0	0	0	0	0	0	0
57120	GOPC	ASD ID/DD	2	stopgain,nonsynonymous SNV	6q22.1	golgi associated PDZ and coiled-coil motif containing	protein-coding	1	0	0	0	0	0	0	1	0	0	0	0	0	0	0	0	0	1	0	0	0	0	0
23030	KDM4B	ASD ID/DD	4	nonsynonymous SNV,stopgain,synonymous SNV	19p13.3	lysine demethylase 4B	protein-coding	0	0	0	0	0	0	1	0	0	0	0	0	0	0	0	0	1	1	0	0	1	0	1
23064	SETX	ASD ID/DD	4	synonymous SNV,nonsynonymous SNV,nonframeshift deletion	9q34.13	senataxin	protein-coding	0	0	0	0	0	0	1	0	0	0	0	0	0	0	0	0	0	0	0	0	0	0	0
344892	RTP2	ASD ID/DD	2	nonsynonymous SNV,synonymous SNV	3q27.3	receptor transporter protein 2	protein-coding	0	0	0	0	0	0	0	0	0	0	0	0	0	0	0	0	0	0	0	0	0	0	0
389362	PSMG4	ASD ID/DD	2	nonsynonymous SNV	6p25.2	proteasome assembly chaperone 4	protein-coding	1	0	0	0	0	0	0	0	0	0	0	0	0	0	0	0	0	0	0	0	0	0	0
5340	PLG	ASD ID/DD	2	nonsynonymous SNV,synonymous SNV	6q26	plasminogen	protein-coding	0	0	0	0	0	0	0	0	0	0	0	0	0	0	0	0	0	0	0	0	0	0	0
55660	PRPF40A	ASD ID/DD	5	splice-site mutation,frameshift deletion,nonframeshift deletion,nonsynonymous SNV,stopgain	2q23.3	pre-mRNA processing factor 40 homolog A	protein-coding	1	0	0	0	0	0	0	1	0	0	0	0	0	0	0	0	0	1	0	0	0	0	1
773	CACNA1A	ASD ID/DD	8	synonymous SNV,nonsynonymous SNV,frameshift deletion,stopgain	19p13.13	calcium voltage-gated channel subunit alpha1 A	protein-coding	0	1	0	0	0	0	1	1	1	0	0	0	1	0	1	1	0	0	0	0	0	0	1
5352	PLOD2	ASD ID/DD	2	nonsynonymous SNV	3q24	procollagen-lysine,2-oxoglutarate 5-dioxygenase 2	protein-coding	0	0	0	0	0	0	0	1	0	0	0	0	0	0	0	0	0	0	1	0	0	0	0
8925	HERC1	ASD ID/DD	4	nonsynonymous SNV,stopgain	15q22.31	HECT and RLD domain containing E3 ubiquitin protein ligase family member 1	protein-coding	0	0	0	0	0	0	1	0	0	0	0	0	1	0	0	0	0	0	0	0	0	0	1
6776	STAT5A	ASD ID/DD	2	nonsynonymous SNV	17q21.2	signal transducer and activator of transcription 5A	protein-coding	0	1	1	0	0	0	0	0	0	0	0	0	0	0	0	0	0	0	0	0	0	0	1
23358	USP24	ASD ID/DD	3	nonsynonymous SNV	1p32.3	ubiquitin specific peptidase 24	protein-coding	0	0	0	0	0	0	0	0	0	0	0	0	0	0	0	0	0	1	0	0	0	0	1
9820	CUL7	ASD ID/DD	3	nonsynonymous SNV	6p21.1	cullin 7	protein-coding	0	1	0	0	0	0	0	0	0	0	0	0	0	0	0	0	0	1	1	0	0	0	0
155435	RBM33	ASD ID/DD	5	nonsynonymous SNV,synonymous SNV	7q36.3	RNA binding motif protein 33	protein-coding	1	0	0	0	0	0	0	1	0	0	0	0	0	0	0	0	0	0	0	0	1	0	1
11317	RBPJL	ASD ID/DD	3	synonymous SNV,nonsynonymous SNV	20q13.12	recombination signal binding protein for immunoglobulin kappa J region like	protein-coding	0	0	0	0	0	0	0	0	0	0	0	0	0	0	0	0	0	0	0	0	0	0	0
6710	SPTB	ASD ID/DD	4	nonsynonymous SNV,synonymous SNV	14q23.3	spectrin beta, erythrocytic	protein-coding	0	1	0	0	0	0	1	0	0	0	0	0	0	0	0	0	0	0	0	0	1	0	1
57565	KLHL14	ASD ID/DD	4	nonsynonymous SNV,synonymous SNV	18q12.1	kelch like family member 14	protein-coding	0	0	0	0	0	0	0	0	0	0	0	0	0	0	0	0	0	0	0	0	0	0	0
10432	RBM14	ASD ID/DD	3	nonsynonymous SNV,synonymous SNV	11q13.2	RNA binding motif protein 14	protein-coding	1	0	0	0	0	0	0	0	0	0	0	0	0	0	0	0	0	0	0	0	0	0	1
9375	TM9SF2	ASD ID/DD	2	synonymous SNV,nonsynonymous SNV	13q32.3	transmembrane 9 superfamily member 2	protein-coding	1	0	0	0	0	0	0	0	0	0	0	0	0	0	0	0	0	0	0	0	0	0	1
23082	PPRC1	ASD ID/DD	2	nonsynonymous SNV,frameshift insertion	10q24.32	peroxisome proliferator-activated receptor gamma, coactivator-related 1	protein-coding	0	0	0	0	0	0	0	0	0	0	0	0	0	0	0	0	0	1	0	0	0	0	1
287	ANK2	ASD ID/DD	9	stopgain,nonsynonymous SNV,frameshift deletion,splice-site mutation	4q25-q26	ankyrin 2	protein-coding	0	1	0	0	0	0	1	1	1	0	0	0	0	0	0	0	0	0	0	0	1	1	1
8927	BSN	ASD ID/DD	4	nonsynonymous SNV,synonymous SNV	3p21.31	bassoon presynaptic cytomatrix protein	protein-coding	0	0	0	0	0	0	1	0	1	0	0	0	1	0	1	0	0	0	0	0	0	0	1
1107	CHD3	ASD ID/DD	13	nonsynonymous SNV,synonymous SNV,stopgain,frameshift insertion	17p13.1	chromodomain helicase DNA binding protein 3	protein-coding	0	0	0	0	0	0	1	0	0	0	0	0	0	0	0	0	1	1	0	0	0	0	1
23272	FAM208A	ASD ID/DD	2	synonymous SNV,nonsynonymous SNV	3p14.3	family with sequence similarity 208 member A	protein-coding	0	0	0	0	0	0	0	0	0	0	0	0	0	0	0	0	0	1	0	0	0	0	1
6614	SIGLEC1	ASD ID/DD	3	nonsynonymous SNV,synonymous SNV	20p13	sialic acid binding Ig like lectin 1	protein-coding	0	0	0	0	0	0	0	0	0	0	0	0	0	0	0	0	0	0	0	0	0	0	0
7301	TYRO3	ASD ID/DD	2	nonsynonymous SNV	15q15.1	TYRO3 protein tyrosine kinase	protein-coding	0	0	0	0	0	0	0	0	0	0	0	0	1	0	0	0	0	0	0	0	0	0	0
3831	KLC1	ASD ID/DD	2	frameshift insertion,nonsynonymous SNV	14q32.33	kinesin light chain 1	protein-coding	0	0	0	0	0	0	1	1	0	0	0	0	1	0	0	0	0	0	0	0	0	0	0
9738	CCP110	ASD ID/DD	2	synonymous SNV	16p12.3	centriolar coiled-coil protein 110	protein-coding	0	0	0	0	0	0	0	0	0	0	0	0	0	0	0	0	0	0	0	0	0	0	0
64852	TUT1	ASD ID/DD	2	nonsynonymous SNV	11q12.3	terminal uridylyl transferase 1, U6 snRNA-specific	protein-coding	1	0	0	0	0	0	0	0	0	0	0	0	0	0	0	0	0	0	0	0	0	0	0
7483	WNT9A	ASD ID/DD	2	frameshift deletion,synonymous SNV	1q42.13	Wnt family member 9A	protein-coding	0	1	0	0	0	0	0	0	0	0	0	0	0	0	0	0	0	0	0	0	0	0	0
153579	BTNL9	ASD ID/DD	2	synonymous SNV,nonsynonymous SNV	5q35.3	butyrophilin like 9	protein-coding	0	0	0	0	0	0	0	0	0	0	0	0	0	0	0	0	0	0	0	0	0	0	0
29072	SETD2	ASD ID/DD	9	frameshift deletion,synonymous SNV,nonsynonymous SNV,frameshift insertion,nonframeshift deletion	3p21.31	SET domain containing 2	protein-coding	1	1	0	0	0	0	0	0	0	0	0	0	0	0	0	0	1	1	0	0	0	1	1
51702	PADI3	ASD ID/DD	2	nonsynonymous SNV	1p36.13	peptidyl arginine deiminase 3	protein-coding	0	0	0	0	0	0	0	0	0	0	0	0	0	0	0	0	0	0	0	0	0	0	0
9496	TBX4	ASD ID/DD	3	nonsynonymous SNV,synonymous SNV	17q23.2	T-box 4	protein-coding	0	1	1	0	0	0	0	0	0	0	0	0	0	0	0	0	0	0	1	0	0	0	0
2900	GRIK4	ASD ID/DD	2	nonsynonymous SNV,synonymous SNV	11q23.3	glutamate ionotropic receptor kainate type subunit 4	protein-coding	0	0	0	0	0	0	0	0	0	0	0	0	0	0	0	0	0	0	0	0	0	0	0
80036	TRPM3	ASD ID/DD	3	frameshift deletion,nonsynonymous SNV	9q21.12-q21.13	transient receptor potential cation channel subfamily M member 3	protein-coding	0	0	0	0	0	0	1	0	0	0	0	0	1	0	0	1	0	0	0	0	0	0	0
54753	ZNF853	ASD ID/DD	3	stopgain,nonframeshift insertion,nonsynonymous SNV	7p22.1	zinc finger protein 853	protein-coding	0	0	0	0	0	0	0	0	0	0	0	0	0	0	0	0	0	0	0	0	0	0	0
6491	STIL	ASD ID/DD	3	nonsynonymous SNV	1p33	STIL, centriolar assembly protein	protein-coding	0	1	0	0	0	0	0	0	0	0	0	0	0	0	0	0	0	1	1	0	0	0	0
57556	SEMA6A	ASD ID/DD	2	stopgain,frameshift insertion	5q23.1	semaphorin 6A	protein-coding	0	0	0	0	0	0	0	0	0	0	0	0	0	0	0	0	0	0	0	0	1	0	1
5364	PLXNB1	ASD ID/DD	6	frameshift deletion,nonsynonymous SNV,synonymous SNV	3p21.31	plexin B1	protein-coding	0	0	0	0	1	0	1	0	0	0	0	0	0	0	0	0	0	0	0	0	0	1	0
4146	MATN1	ASD ID/DD	2	nonsynonymous SNV	1p35.2	matrilin 1, cartilage matrix protein	protein-coding	0	0	0	0	0	0	0	0	0	0	0	0	0	0	0	0	0	0	0	0	0	0	0
815	CAMK2A	ASD ID/DD	5	nonsynonymous SNV,splice-site mutation,synonymous SNV	5q32	calcium/calmodulin dependent protein kinase II alpha	protein-coding	0	0	0	0	0	0	1	0	1	1	1	0	1	1	0	0	0	0	1	1	0	0	1
57224	NHSL1	ASD ID/DD	3	nonsynonymous SNV,frameshift deletion	6q24.1	NHS like 1	protein-coding	0	0	0	0	0	0	1	0	0	0	0	0	0	0	0	0	0	0	0	0	0	0	0
339761	CYP27C1	ASD ID/DD	4	frameshift deletion,nonsynonymous SNV	2q14.3	cytochrome P450 family 27 subfamily C member 1	protein-coding	0	0	0	0	0	0	0	0	0	0	0	0	0	0	0	0	0	0	0	0	0	0	0
55061	SUSD4	ASD ID/DD	4	nonsynonymous SNV	1q41	sushi domain containing 4	protein-coding	0	0	0	0	0	0	0	0	0	0	0	0	0	0	0	0	0	0	0	0	0	0	0
114799	ESCO1	ASD ID/DD	2	synonymous SNV,nonsynonymous SNV	18q11.2	establishment of sister chromatid cohesion N-acetyltransferase 1	protein-coding	0	0	0	0	0	0	0	0	0	0	0	0	0	0	0	0	0	0	0	0	0	0	1
54821	ERCC6L	ASD ID/DD	3	nonsynonymous SNV,synonymous SNV	Xq13.1	ERCC excision repair 6 like, spindle assembly checkpoint helicase	protein-coding	0	0	0	0	0	0	0	0	0	0	0	0	0	0	0	0	0	1	0	0	0	0	1
2891	GRIA2	ASD ID/DD	3	stopgain,synonymous SNV,nonframeshift deletion	4q32.1	glutamate ionotropic receptor AMPA type subunit 2	protein-coding	0	1	0	0	0	0	0	1	1	0	0	0	1	1	1	1	0	0	0	0	0	0	1
6521	SLC4A1	ASD ID/DD	2	nonframeshift deletion,nonsynonymous SNV	17q21.31	solute carrier family 4 member 1 (Diego blood group)	protein-coding	0	1	0	0	0	0	0	0	0	0	0	0	0	0	0	0	0	0	0	0	0	0	1
343099	CCDC18	ASD ID/DD	2	nonsynonymous SNV	1p22.1	coiled-coil domain containing 18	protein-coding	0	0	0	0	0	0	0	0	0	0	0	0	0	0	0	0	0	1	0	0	0	0	0
7091	TLE4	ASD ID/DD	2	nonsynonymous SNV	9q21.31	transducin like enhancer of split 4	protein-coding	0	0	0	0	0	0	0	1	0	0	0	0	0	0	0	0	0	0	0	0	0	0	1
84125	LRRIQ1	ASD ID/DD	2	synonymous SNV,nonsynonymous SNV	12q21.31	leucine rich repeats and IQ motif containing 1	protein-coding	0	0	0	0	0	0	0	0	0	0	0	0	0	0	0	0	0	0	0	0	0	0	0
84823	LMNB2	ASD ID/DD	2	synonymous SNV,nonsynonymous SNV	19p13.3	lamin B2	protein-coding	0	1	0	0	0	0	0	0	0	0	0	0	0	0	0	0	0	1	0	0	0	0	1
2917	GRM7	ASD ID/DD	4	nonsynonymous SNV,synonymous SNV	3p26.1	glutamate metabotropic receptor 7	protein-coding	0	0	0	0	0	0	0	0	1	0	0	0	1	0	0	0	0	0	0	0	0	0	1
4135	MAP6	ASD ID/DD	3	nonsynonymous SNV,synonymous SNV	11q13.5	microtubule associated protein 6	protein-coding	0	1	0	0	0	0	0	0	1	0	0	0	1	0	0	1	0	0	0	0	0	0	0
828	CAPS	ASD ID/DD	2	synonymous SNV	19p13.3	calcyphosine	protein-coding	0	0	0	0	0	0	0	0	0	0	0	0	0	0	0	0	0	0	0	0	0	0	0
23053	ZSWIM8	ASD ID/DD	6	nonsynonymous SNV,synonymous SNV	10q22.2	zinc finger SWIM-type containing 8	protein-coding	1	0	0	0	0	0	1	0	0	0	0	0	0	0	0	0	0	0	0	0	1	0	1
26130	GAPVD1	ASD ID/DD	3	nonsynonymous SNV	9q33.3	GTPase activating protein and VPS9 domains 1	protein-coding	1	0	0	0	0	0	0	1	0	0	0	0	0	0	0	0	0	0	0	0	1	0	1
285335	SLC9C1	ASD ID/DD	4	nonsynonymous SNV,synonymous SNV	3q13.2	solute carrier family 9 member C1	protein-coding	0	0	0	0	0	0	0	0	0	0	0	0	0	0	0	0	0	0	0	0	0	0	0
3294	HSD17B2	ASD ID/DD	2	nonsynonymous SNV,synonymous SNV	16q23.3	hydroxysteroid 17-beta dehydrogenase 2	protein-coding	0	1	0	0	0	0	0	0	0	0	0	0	1	0	0	0	0	0	0	0	0	0	0
10260	DENND4A	ASD ID/DD	4	nonsynonymous SNV	15q22.31	DENN domain containing 4A	protein-coding	1	0	0	0	0	0	0	0	0	0	0	0	0	0	0	0	0	0	0	0	0	0	0
4134	MAP4	ASD ID/DD	2	nonsynonymous SNV	3p21.31	microtubule associated protein 4	protein-coding	0	0	0	0	0	0	1	0	1	0	0	0	0	0	0	1	0	0	0	0	0	0	1
65217	PCDH15	ASD ID/DD	5	nonsynonymous SNV,synonymous SNV,frameshift deletion	10q21.1	protocadherin related 15	protein-coding	0	0	0	0	1	1	0	0	0	0	0	0	1	0	0	0	0	0	0	0	0	0	0
57509	MTUS1	ASD ID/DD	5	nonsynonymous SNV,stopgain,synonymous SNV	8p22	microtubule associated scaffold protein 1	protein-coding	0	0	0	0	0	0	0	0	0	0	0	0	0	0	0	0	0	0	0	0	0	0	0
64763	ZNF574	ASD ID/DD	3	synonymous SNV,nonsynonymous SNV	19q13.2	zinc finger protein 574	protein-coding	1	0	1	0	0	0	0	0	0	0	0	0	0	0	0	0	0	1	0	0	0	0	1
7468	NSD2	ASD ID/DD	5	frameshift deletion,stopgain,nonsynonymous SNV	4p16.3	nuclear receptor binding SET domain protein 2	protein-coding	0	1	1	0	0	0	0	1	0	0	0	0	0	0	0	0	0	0	0	0	1	0	1
50940	PDE11A	ASD ID/DD	3	stopgain,nonsynonymous SNV,splice-site mutation	2q31.2	phosphodiesterase 11A	protein-coding	0	0	0	0	0	0	0	0	1	0	0	0	1	0	0	0	0	0	0	0	0	0	0
8165	AKAP1	ASD ID/DD	3	nonsynonymous SNV	17q22	A-kinase anchoring protein 1	protein-coding	0	0	0	0	0	0	0	0	0	0	0	0	0	0	0	0	1	0	0	0	1	0	0
8467	SMARCA5	ASD ID/DD	4	nonsynonymous SNV,nonframeshift deletion,splice-site mutation	4q31.21	SWI/SNF related, matrix associated, actin dependent regulator of chromatin, subfamily a, member 5	protein-coding	0	1	0	0	0	0	0	0	0	0	0	0	0	0	0	0	0	0	0	0	0	0	1
147968	CAPN12	ASD ID/DD	4	nonsynonymous SNV,synonymous SNV	19q13.2	calpain 12	protein-coding	0	0	0	0	0	0	0	0	0	0	0	0	0	0	0	0	0	0	0	0	0	0	0
144097	C11orf84	ASD ID/DD	2	nonsynonymous SNV	11q13.1	chromosome 11 open reading frame 84	protein-coding	0	0	0	0	0	0	0	0	0	0	0	0	0	0	0	0	0	0	0	0	0	0	0
9846	GAB2	ASD ID/DD	2	nonsynonymous SNV	11q14.1	GRB2 associated binding protein 2	protein-coding	0	0	0	0	0	0	0	0	0	0	0	0	0	0	0	0	0	0	0	0	0	0	1
22941	SHANK2	ASD ID/DD	3	stopgain,nonsynonymous SNV,unknown	11q13.3-q13.4	SH3 and multiple ankyrin repeat domains 2	protein-coding	0	0	0	0	0	0	1	0	1	0	1	0	1	1	0	0	0	0	1	0	1	0	1
84465	MEGF11	ASD ID/DD	4	nonsynonymous SNV	15q22.31	multiple EGF like domains 11	protein-coding	0	0	0	0	1	0	0	0	0	0	0	0	0	0	0	0	0	0	0	0	0	0	0
7532	YWHAG	ASD ID/DD	3	nonsynonymous SNV	7q11.23	tyrosine 3-monooxygenase/tryptophan 5-monooxygenase activation protein gamma	protein-coding	0	0	0	0	0	0	1	0	1	0	1	0	0	0	0	0	0	0	0	0	0	0	1
2562	GABRB3	ASD ID/DD	8	nonsynonymous SNV,frameshift deletion,nonframeshift insertion	15q12	gamma-aminobutyric acid type A receptor beta3 subunit	protein-coding	0	1	0	0	0	0	0	0	0	0	0	0	1	0	1	0	0	0	0	0	1	0	1
6599	SMARCC1	ASD ID/DD	2	nonsynonymous SNV,synonymous SNV	3p21.31	SWI/SNF related, matrix associated, actin dependent regulator of chromatin subfamily c member 1	protein-coding	0	1	0	0	0	0	0	0	0	0	0	0	0	0	0	0	1	1	0	0	0	0	1
6294	SAFB	ASD ID/DD	2	synonymous SNV,frameshift deletion	19p13.3	scaffold attachment factor B	protein-coding	0	1	0	0	0	0	0	0	0	0	0	0	1	0	0	0	0	0	0	0	0	0	1
51720	UIMC1	ASD ID/DD	3	nonsynonymous SNV	5q35.2	ubiquitin interaction motif containing 1	protein-coding	0	0	0	0	0	0	0	0	0	0	0	0	0	0	0	0	0	0	0	0	0	0	0
1783	DYNC1LI2	ASD ID/DD	2	nonsynonymous SNV,stopgain	16q22.1	dynein cytoplasmic 1 light intermediate chain 2	protein-coding	0	0	0	0	0	0	0	0	0	0	0	0	0	0	0	0	0	0	0	0	0	0	0
339456	TMEM52	ASD ID/DD	2	nonsynonymous SNV,synonymous SNV	1p36.33	transmembrane protein 52	protein-coding	0	0	0	0	0	0	0	0	0	0	0	0	0	0	0	0	0	0	0	0	0	0	0
4126	MANBA	ASD ID/DD	3	synonymous SNV,nonsynonymous SNV	4q24	mannosidase beta	protein-coding	0	0	0	0	0	0	0	0	0	0	0	0	0	0	0	0	0	0	1	0	0	0	0
5090	PBX3	ASD ID/DD	2	nonsynonymous SNV	9q33.3	PBX homeobox 3	protein-coding	0	1	1	0	0	0	0	0	0	0	0	0	1	0	0	0	0	0	0	0	0	0	0
11120	BTN2A1	ASD ID/DD	2	nonsynonymous SNV	6p22.2	butyrophilin subfamily 2 member A1	protein-coding	0	0	0	0	0	0	0	0	0	0	0	0	0	0	0	0	0	0	0	0	0	0	0
9514	GAL3ST1	ASD ID/DD	3	nonsynonymous SNV	22q12.2	galactose-3-O-sulfotransferase 1	protein-coding	0	0	0	0	0	0	0	0	0	0	0	0	1	0	0	0	0	0	0	0	0	0	0
54103	GSAP	ASD ID/DD	3	nonsynonymous SNV,synonymous SNV	7q11.23	gamma-secretase activating protein	protein-coding	0	0	0	0	0	0	0	0	0	0	0	0	0	0	0	0	0	0	0	0	0	0	0
5781	PTPN11	ASD ID/DD	8	frameshift deletion,nonsynonymous SNV	12q24.13	protein tyrosine phosphatase, non-receptor type 11	protein-coding	1	1	0	0	0	0	1	0	1	0	1	0	0	0	0	0	0	0	0	1	0	1	1
8019	BRD3	ASD ID/DD	4	nonsynonymous SNV,synonymous SNV	9q34.2	bromodomain containing 3	protein-coding	0	0	0	0	0	0	0	0	0	0	0	0	0	0	0	0	1	1	0	0	0	0	0
5783	PTPN13	ASD ID/DD	3	nonsynonymous SNV,splice-site mutation,synonymous SNV	4q21.3	protein tyrosine phosphatase, non-receptor type 13	protein-coding	0	0	0	0	0	0	0	0	0	0	0	0	0	0	0	0	0	0	0	0	0	0	0
10807	SDCCAG3	ASD ID/DD	3	stopgain,nonsynonymous SNV	9q34.3	serologically defined colon cancer antigen 3	protein-coding	1	0	0	0	0	0	0	0	0	0	0	0	0	0	0	0	0	0	0	0	0	0	0
8464	SUPT3H	ASD ID/DD	3	nonsynonymous SNV,synonymous SNV	6p21.1	SPT3 homolog, SAGA and STAGA complex component	protein-coding	0	0	0	0	0	0	0	0	0	0	0	0	0	0	0	0	1	0	0	0	0	0	0
6687	SPG7	ASD ID/DD	2	nonsynonymous SNV	16q24.3	SPG7, paraplegin matrix AAA peptidase subunit	protein-coding	1	0	0	0	0	0	0	0	0	0	0	0	1	0	0	0	0	0	0	0	0	0	0
29850	TRPM5	ASD ID/DD	3	splice-site mutation,synonymous SNV,nonsynonymous SNV	11p15.5	transient receptor potential cation channel subfamily M member 5	protein-coding	0	0	0	0	0	0	0	0	0	0	0	0	0	0	0	0	0	0	0	0	0	0	0
94137	RP1L1	ASD ID/DD	7	nonsynonymous SNV,frameshift deletion,nonframeshift insertion	8p23.1	RP1 like 1	protein-coding	0	0	0	0	0	0	0	0	0	0	0	0	0	0	0	0	0	0	0	0	0	0	0
1314	COPA	ASD ID/DD	2	nonsynonymous SNV	1q23.2	coatomer protein complex subunit alpha	protein-coding	1	0	0	0	0	0	0	0	1	0	0	0	0	0	0	0	0	0	0	0	0	0	1
57661	PHRF1	ASD ID/DD	4	nonsynonymous SNV	11p15.5	PHD and ring finger domains 1	protein-coding	1	0	0	0	0	0	0	0	0	0	0	0	0	0	0	0	1	0	0	0	1	0	1
10066	SCAMP2	ASD ID/DD	2	frameshift deletion,nonsynonymous SNV	15q24.1	secretory carrier membrane protein 2	protein-coding	1	0	0	0	0	0	0	0	0	0	0	0	0	0	0	0	0	0	0	0	0	0	0
283450	HECTD4	ASD ID/DD	7	nonsynonymous SNV,stopgain,synonymous SNV	12q24.13	HECT domain E3 ubiquitin protein ligase 4	protein-coding	0	0	0	0	0	0	0	0	0	0	0	0	0	0	0	0	0	0	0	0	1	0	1
151011	43718	ASD ID/DD	3	nonsynonymous SNV,synonymous SNV	2q13	septin 10	protein-coding	0	0	0	0	0	0	0	0	0	0	0	0	0	0	0	0	0	1	0	0	0	0	0
667	DST	ASD ID/DD	4	frameshift deletion,nonsynonymous SNV,stopgain	6p12.1	dystonin	protein-coding	0	1	0	0	1	0	1	1	1	0	0	0	0	0	0	0	0	0	0	0	0	0	1
25890	ABI3BP	ASD ID/DD	5	nonsynonymous SNV,synonymous SNV	3q12.2	ABI family member 3 binding protein	protein-coding	0	0	0	0	1	0	0	0	0	0	0	0	0	0	0	0	0	0	0	0	0	0	0
284058	KANSL1	ASD ID/DD	9	nonsynonymous SNV,frameshift deletion,frameshift insertion,splice-site mutation,stopgain	17q21.31	KAT8 regulatory NSL complex subunit 1	protein-coding	0	0	0	0	0	0	0	0	0	0	0	0	1	0	0	0	0	1	1	0	0	0	1
83475	DOHH	ASD ID/DD	2	nonsynonymous SNV,synonymous SNV	19p13.3	deoxyhypusine hydroxylase	protein-coding	1	0	0	0	0	0	0	0	0	0	0	0	0	0	0	0	0	0	0	0	0	0	0
64431	ACTR6	ASD ID/DD	2	nonsynonymous SNV	12q23.1	ARP6 actin related protein 6 homolog	protein-coding	0	0	0	0	0	0	0	0	0	0	0	0	0	0	0	0	0	0	0	0	0	0	0
23020	SNRNP200	ASD ID/DD	3	nonsynonymous SNV	2q11.2	small nuclear ribonucleoprotein U5 subunit 200	protein-coding	1	1	0	0	0	0	0	0	0	0	0	0	0	0	0	0	0	1	0	0	0	0	1
23774	BRD1	ASD ID/DD	3	nonsynonymous SNV,frameshift deletion	22q13.33	bromodomain containing 1	protein-coding	0	1	0	0	0	0	0	0	0	0	0	0	0	0	0	0	1	1	1	0	1	0	1
3305	HSPA1L	ASD ID/DD	2	synonymous SNV,nonsynonymous SNV	6p21.33	heat shock protein family A (Hsp70) member 1 like	protein-coding	0	0	0	0	0	0	0	0	0	0	0	0	0	0	0	0	0	0	0	0	0	0	0
54014	BRWD1	ASD ID/DD	4	frameshift deletion,nonsynonymous SNV,stopgain	21q22.2	bromodomain and WD repeat domain containing 1	protein-coding	0	0	0	0	0	0	0	0	0	0	0	0	0	0	0	0	1	0	0	0	0	0	1
9201	DCLK1	ASD ID/DD	2	nonsynonymous SNV	13q13.3	doublecortin like kinase 1	protein-coding	0	0	0	0	0	0	1	0	1	0	0	0	0	0	0	1	0	0	0	0	0	0	1
8567	MADD	ASD ID/DD	3	nonsynonymous SNV	11p11.2	MAP kinase activating death domain	protein-coding	0	1	0	0	0	0	1	1	0	0	0	0	1	0	1	0	0	0	0	0	0	0	0
9031	BAZ1B	ASD ID/DD	2	nonsynonymous SNV	7q11.23	bromodomain adjacent to zinc finger domain 1B	protein-coding	1	1	0	0	0	0	0	0	1	0	0	0	1	0	0	0	1	1	0	0	0	0	1
285175	UNC80	ASD ID/DD	9	stopgain,nonsynonymous SNV,synonymous SNV	2q34	unc-80 homolog, NALCN channel complex subunit	protein-coding	0	0	0	0	0	0	0	1	0	0	0	0	0	0	0	0	0	0	1	0	0	1	0
23165	NUP205	ASD ID/DD	3	synonymous SNV,nonsynonymous SNV	7q33	nucleoporin 205	protein-coding	0	0	0	0	0	0	0	0	0	0	0	0	0	0	0	0	0	0	0	0	0	0	1
8559	PRPF18	ASD ID/DD	3	nonsynonymous SNV	10p13	pre-mRNA processing factor 18	protein-coding	1	0	0	0	0	0	0	1	0	0	0	0	0	0	0	0	0	0	0	0	0	0	0
8178	ELL	ASD ID/DD	2	synonymous SNV,nonsynonymous SNV	19p13.11	elongation factor for RNA polymerase II	protein-coding	0	1	0	0	0	0	0	0	0	0	0	0	0	0	0	0	0	0	0	0	0	0	1
1938	EEF2	ASD ID/DD	3	nonsynonymous SNV	19p13.3	eukaryotic translation elongation factor 2	protein-coding	1	0	0	0	0	0	1	0	1	0	0	0	0	0	0	0	0	1	0	0	1	0	1
388886	LRRC75B	ASD ID/DD	3	synonymous SNV,nonsynonymous SNV	22q11.23	leucine rich repeat containing 75B	protein-coding	0	0	0	0	0	0	0	0	0	0	0	0	0	0	0	0	0	0	0	0	0	0	0
253959	RALGAPA1	ASD ID/DD	4	nonsynonymous SNV,nonframeshift deletion	14q13.2	Ral GTPase activating protein catalytic alpha subunit 1	protein-coding	0	0	0	0	0	0	1	1	0	0	0	0	0	0	0	0	0	0	0	0	0	0	1
192669	AGO3	ASD ID/DD	2	nonsynonymous SNV	1p34.3	argonaute 3, RISC catalytic component	protein-coding	0	0	0	0	0	0	0	0	0	0	0	0	0	0	0	0	0	0	0	0	0	0	1
2132	EXT2	ASD ID/DD	2	nonsynonymous SNV	11p11.2	exostosin glycosyltransferase 2	protein-coding	1	1	0	0	0	0	0	0	0	0	0	0	0	0	0	0	0	1	0	0	0	0	0
1889	ECE1	ASD ID/DD	2	splice-site mutation,synonymous SNV	1p36.12	endothelin converting enzyme 1	protein-coding	0	1	0	0	0	0	0	0	0	0	0	0	0	0	0	0	0	0	0	0	0	0	1
23600	AMACR	ASD ID/DD	2	synonymous SNV,nonsynonymous SNV	5p13.2	alpha-methylacyl-CoA racemase	protein-coding	0	0	0	0	0	0	0	0	0	0	0	0	0	0	0	0	0	0	0	0	0	0	0
57822	GRHL3	ASD ID/DD	2	synonymous SNV,nonsynonymous SNV	1p36.11	grainyhead like transcription factor 3	protein-coding	0	1	1	0	0	0	0	0	0	0	0	0	1	0	0	0	0	0	1	0	0	0	1
57463	AMIGO1	ASD ID/DD	3	nonsynonymous SNV	1p13.3	adhesion molecule with Ig like domain 1	protein-coding	0	0	0	0	1	0	0	0	0	0	0	0	0	0	0	0	0	0	0	0	0	0	0
3674	ITGA2B	ASD ID/DD	2	nonsynonymous SNV	17q21.31	integrin subunit alpha 2b	protein-coding	0	0	0	0	1	0	0	0	0	0	0	0	0	0	0	0	0	0	0	0	0	0	0
9734	HDAC9	ASD ID/DD	2	nonsynonymous SNV,synonymous SNV	7p21.1	histone deacetylase 9	protein-coding	0	0	0	0	0	0	0	0	0	0	0	0	0	0	0	0	1	0	0	0	0	0	1
25959	KANK2	ASD ID/DD	3	synonymous SNV,nonsynonymous SNV	19p13.2	KN motif and ankyrin repeat domains 2	protein-coding	0	0	0	0	0	1	0	0	0	0	0	0	0	0	0	0	0	0	0	0	0	0	1
7461	CLIP2	ASD ID/DD	2	nonsynonymous SNV	7q11.23	CAP-Gly domain containing linker protein 2	protein-coding	0	0	0	0	0	0	0	0	1	0	0	0	1	0	0	0	0	0	0	0	1	0	1
55778	ZNF839	ASD ID/DD	2	nonsynonymous SNV,synonymous SNV	14q32.31	zinc finger protein 839	protein-coding	0	0	0	0	0	0	0	0	0	0	0	0	0	0	0	0	0	0	0	0	0	0	0
64067	NPAS3	ASD ID/DD	3	synonymous SNV,nonsynonymous SNV	14q13.1	neuronal PAS domain protein 3	protein-coding	0	1	0	0	0	0	0	0	0	0	0	0	1	0	0	0	0	0	0	0	0	0	1
253714	MMS22L	ASD ID/DD	2	nonsynonymous SNV	6q16.1	MMS22 like, DNA repair protein	protein-coding	0	0	0	0	0	0	0	0	0	0	0	0	0	0	0	0	0	1	0	0	0	0	0
9757	KMT2B	ASD ID/DD	8	synonymous SNV,frameshift insertion,nonsynonymous SNV	19q13.12	lysine methyltransferase 2B	protein-coding	0	0	0	0	0	0	0	0	0	0	0	0	0	0	0	0	0	0	1	0	0	0	1
8985	PLOD3	ASD ID/DD	4	nonsynonymous SNV,synonymous SNV	7q22.1	procollagen-lysine,2-oxoglutarate 5-dioxygenase 3	protein-coding	1	1	0	0	0	0	0	0	0	0	0	0	0	0	0	0	0	0	1	0	0	0	0
3791	KDR	ASD ID/DD	3	nonsynonymous SNV,synonymous SNV,stopgain	4q12	kinase insert domain receptor	protein-coding	0	1	0	0	0	0	0	0	0	0	0	0	0	0	0	0	0	0	0	0	0	0	1
2746	GLUD1	ASD ID/DD	2	nonsynonymous SNV	10q23.2	glutamate dehydrogenase 1	protein-coding	0	0	0	0	0	0	0	0	0	0	0	0	0	0	0	0	0	0	0	0	0	0	0
64834	ELOVL1	ASD ID/DD	2	nonsynonymous SNV	1p34.2	ELOVL fatty acid elongase 1	protein-coding	1	0	0	0	0	0	0	0	0	0	0	0	0	0	0	0	0	0	0	0	0	0	0
5099	PCDH7	ASD ID/DD	2	nonsynonymous SNV	4p15.1	protocadherin 7	protein-coding	0	0	0	0	1	0	1	0	0	0	0	0	0	0	0	0	0	0	0	0	0	0	0
727910	TLCD2	ASD ID/DD	2	nonsynonymous SNV,synonymous SNV	17p13.3	TLC domain containing 2	protein-coding	0	0	0	0	0	0	0	0	0	0	0	0	0	0	0	0	0	0	0	0	0	0	0
283349	RASSF3	ASD ID/DD	2	nonframeshift deletion,synonymous SNV	12q14.2	Ras association domain family member 3	protein-coding	0	0	0	0	0	0	0	0	0	0	0	0	0	0	0	0	0	0	0	0	0	0	0
163259	DENND2C	ASD ID/DD	2	nonsynonymous SNV	1p13.2	DENN domain containing 2C	protein-coding	0	0	0	0	0	0	0	0	0	0	0	0	0	0	0	0	0	0	0	0	0	0	0
158584	FAAH2	ASD ID/DD	2	nonsynonymous SNV	Xp11.21	fatty acid amide hydrolase 2	protein-coding	0	0	0	0	0	0	0	0	0	0	0	0	0	0	0	0	0	0	0	0	0	0	0
220	ALDH1A3	ASD ID/DD	2	nonsynonymous SNV	15q26.3	aldehyde dehydrogenase 1 family member A3	protein-coding	0	1	0	0	0	0	0	0	0	0	0	0	0	0	0	0	0	0	1	0	0	0	1
7707	ZNF148	ASD ID/DD	2	synonymous SNV,stopgain	3q21.2	zinc finger protein 148	protein-coding	0	1	1	0	0	0	0	0	0	0	0	0	0	0	0	0	0	1	0	0	0	0	1
56995	TULP4	ASD ID/DD	4	nonsynonymous SNV	6q25.3	tubby like protein 4	protein-coding	0	0	0	0	0	0	1	0	0	0	0	0	0	0	0	0	0	0	0	0	1	0	1
131616	TMEM42	ASD ID/DD	3	nonsynonymous SNV	3p21.31	transmembrane protein 42	protein-coding	1	0	0	0	0	0	0	0	0	0	0	0	0	0	0	0	0	0	0	0	0	0	0
10210	TOPORS	ASD ID/DD	2	nonsynonymous SNV	9p21.1	TOP1 binding arginine/serine rich protein	protein-coding	1	0	0	0	0	0	0	0	0	0	0	0	0	0	0	0	0	1	0	0	0	0	1
57648	KIAA1522	ASD ID/DD	2	nonsynonymous SNV	1p35.1	KIAA1522	protein-coding	0	0	0	0	0	0	0	0	0	0	0	0	0	0	0	0	0	0	0	0	0	0	0
6814	STXBP3	ASD ID/DD	3	nonsynonymous SNV,splice-site mutation	1p13.3	syntaxin binding protein 3	protein-coding	1	1	0	0	0	0	0	0	0	0	0	0	0	0	0	0	0	0	0	0	0	0	0
5253	PHF2	ASD ID/DD	3	frameshift deletion,stopgain,nonsynonymous SNV	9q22.31	PHD finger protein 2	protein-coding	0	0	0	0	0	0	0	0	0	0	0	0	0	0	0	0	1	1	0	0	1	1	1
132789	GNPDA2	ASD ID/DD	2	nonsynonymous SNV	4p12	glucosamine-6-phosphate deaminase 2	protein-coding	0	0	0	0	0	0	0	0	0	0	0	0	0	0	0	0	0	1	0	0	0	0	0
8924	HERC2	ASD ID/DD	5	synonymous SNV,nonsynonymous SNV	15q13.1	HECT and RLD domain containing E3 ubiquitin protein ligase 2	protein-coding	0	1	0	0	0	0	1	0	0	0	0	0	1	0	0	0	0	0	0	0	1	0	1
119772	OR52M1	ASD ID/DD	2	stopgain,nonsynonymous SNV	11p15.4	olfactory receptor family 52 subfamily M member 1	protein-coding	0	0	0	0	0	0	0	0	0	0	0	0	0	0	0	0	0	0	0	0	0	0	0
933	CD22	ASD ID/DD	2	nonsynonymous SNV	19q13.12	CD22 molecule	protein-coding	0	0	0	0	0	0	0	0	0	0	0	0	0	0	0	0	0	0	0	0	0	0	0
58500	ZNF250	ASD ID/DD	2	nonsynonymous SNV	8q24.3	zinc finger protein 250	protein-coding	0	0	1	0	0	0	0	0	0	0	0	0	0	0	0	0	0	1	0	0	0	0	0
284297	SSC5D	ASD ID/DD	2	nonsynonymous SNV	19q13.42	scavenger receptor cysteine rich family member with 5 domains	protein-coding	0	0	0	0	0	0	0	0	0	0	0	0	0	0	0	0	0	0	0	0	0	0	0
54505	DHX29	ASD ID/DD	2	stopgain,nonsynonymous SNV	5q11.2	DExH-box helicase 29	protein-coding	1	1	0	0	0	0	0	0	0	0	0	0	0	0	0	0	0	1	0	0	0	0	0
54881	TEX10	ASD ID/DD	2	nonsynonymous SNV	9q31.1	testis expressed 10	protein-coding	0	0	0	0	0	0	0	0	0	0	0	0	0	0	0	0	0	1	0	0	0	0	1
6844	VAMP2	ASD ID/DD	3	nonsynonymous SNV	17p13.1	vesicle associated membrane protein 2	protein-coding	0	1	0	0	0	0	1	0	1	0	0	0	0	0	0	1	0	0	0	0	0	0	0
441911	OR10J3	ASD ID/DD	2	nonsynonymous SNV,frameshift deletion	1q23.2	olfactory receptor family 10 subfamily J member 3	protein-coding	0	0	0	0	0	0	0	0	0	0	0	0	0	0	0	0	0	0	0	0	0	0	0
137902	PXDNL	ASD ID/DD	6	synonymous SNV,nonsynonymous SNV	8q11.22-q11.23	peroxidasin like	protein-coding	0	0	0	0	0	0	0	0	0	0	0	0	0	0	0	0	0	0	0	0	0	0	0
5888	RAD51	ASD ID/DD	3	nonsynonymous SNV	15q15.1	RAD51 recombinase	protein-coding	0	1	0	0	0	0	0	0	0	0	0	0	0	0	0	0	0	1	1	0	0	0	1
1842	ECM2	ASD ID/DD	2	stopgain,nonframeshift deletion	9q22.31	extracellular matrix protein 2	protein-coding	0	0	0	0	0	0	0	0	0	0	0	0	0	0	0	0	0	0	0	0	0	0	0
9451	EIF2AK3	ASD ID/DD	2	nonsynonymous SNV	2p11.2	eukaryotic translation initiation factor 2 alpha kinase 3	protein-coding	1	1	0	0	0	0	0	0	0	0	0	0	1	0	0	0	0	1	1	0	0	0	0
2066	ERBB4	ASD ID/DD	4	synonymous SNV,frameshift deletion,nonsynonymous SNV	2q34	erb-b2 receptor tyrosine kinase 4	protein-coding	0	1	0	0	0	0	0	0	0	0	0	0	1	0	0	0	0	0	0	0	0	0	1
114787	GPRIN1	ASD ID/DD	3	frameshift deletion,stopgain,synonymous SNV	5q35.2	G protein regulated inducer of neurite outgrowth 1	protein-coding	0	0	0	0	0	0	1	0	1	1	1	0	0	0	0	0	0	1	0	0	0	0	0
26154	ABCA12	ASD ID/DD	3	nonsynonymous SNV	2q35	ATP binding cassette subfamily A member 12	protein-coding	0	1	0	0	0	0	0	0	0	0	0	0	1	0	0	0	0	0	0	0	0	0	0
51339	DACT1	ASD ID/DD	3	nonsynonymous SNV,frameshift deletion	14q23.1	dishevelled binding antagonist of beta catenin 1	protein-coding	0	1	0	0	0	0	0	0	0	0	0	0	0	0	0	0	0	1	0	0	0	0	0
219899	TBCEL	ASD ID/DD	2	splice-site mutation,nonsynonymous SNV	11q23.3	tubulin folding cofactor E like	protein-coding	0	0	0	0	0	0	0	0	0	0	0	0	0	0	0	0	0	0	0	0	0	0	1
80816	ASXL3	ASD ID/DD	21	frameshift insertion,stopgain,frameshift deletion,splice-site mutation	18q12.1	additional sex combs like 3, transcriptional regulator	protein-coding	0	0	0	0	0	0	0	0	0	0	0	0	0	0	0	0	1	0	1	1	1	1	1
5978	REST	ASD ID/DD	2	nonsynonymous SNV	4q12	RE1 silencing transcription factor	protein-coding	1	1	1	0	0	0	0	0	0	0	0	0	0	0	0	0	0	0	0	0	0	0	1
64864	RFX7	ASD ID/DD	4	frameshift insertion,nonsynonymous SNV,frameshift deletion	15q21.3	regulatory factor X7	protein-coding	0	0	1	0	0	0	0	0	0	0	0	0	0	0	0	0	0	1	0	0	0	0	1
56999	ADAMTS9	ASD ID/DD	5	stopgain,synonymous SNV,nonsynonymous SNV	3p14.1	ADAM metallopeptidase with thrombospondin type 1 motif 9	protein-coding	0	1	0	0	0	0	0	0	0	0	0	0	0	0	0	0	0	0	0	0	0	0	0
23112	TNRC6B	ASD ID/DD	5	frameshift deletion,stopgain,nonsynonymous SNV	22q13.1	trinucleotide repeat containing 6B	protein-coding	0	0	0	0	0	0	1	0	0	0	0	0	0	0	0	0	0	0	0	0	1	1	1
254048	UBN2	ASD ID/DD	4	frameshift deletion,nonsynonymous SNV	7q34	ubinuclein 2	protein-coding	0	0	0	0	0	0	0	0	0	0	0	0	0	0	0	0	0	0	0	0	1	0	1
140883	ZNF280B	ASD ID/DD	2	nonsynonymous SNV	22q11.22	zinc finger protein 280B	protein-coding	0	0	1	0	0	0	0	0	0	0	0	0	0	0	0	0	0	0	0	0	0	0	0
129563	DIS3L2	ASD ID/DD	3	nonsynonymous SNV	2q37.1	DIS3 like 3'-5' exoribonuclease 2	protein-coding	1	0	0	0	0	0	0	0	0	0	0	0	0	0	0	0	0	0	1	0	0	0	0
55167	MSL2	ASD ID/DD	2	frameshift deletion,nonsynonymous SNV	3q22.3	MSL complex subunit 2	protein-coding	0	0	0	0	0	0	0	0	0	0	0	0	0	0	0	0	1	1	0	0	1	0	0
9101	USP8	ASD ID/DD	2	synonymous SNV	15q21.2	ubiquitin specific peptidase 8	protein-coding	1	1	0	0	0	0	0	0	0	0	0	0	0	0	0	0	0	0	0	0	0	0	1
26696	OR2T1	ASD ID/DD	2	nonsynonymous SNV,synonymous SNV	1q44	olfactory receptor family 2 subfamily T member 1	protein-coding	0	0	0	0	0	0	0	0	0	0	0	0	0	0	0	0	0	0	0	0	0	0	0
29994	BAZ2B	ASD ID/DD	6	frameshift insertion,nonsynonymous SNV,stopgain,synonymous SNV	2q24.2	bromodomain adjacent to zinc finger domain 2B	protein-coding	0	0	0	0	0	0	0	1	0	0	0	0	0	0	0	0	1	0	0	0	0	0	1
9797	TATDN2	ASD ID/DD	3	nonsynonymous SNV	3p25.3	TatD DNase domain containing 2	protein-coding	1	0	0	0	0	0	0	0	0	0	0	0	0	0	0	0	0	0	0	0	0	0	0
10599	SLCO1B1	ASD ID/DD	3	nonsynonymous SNV	12p12.1	solute carrier organic anion transporter family member 1B1	protein-coding	0	0	0	0	0	0	0	0	0	0	0	0	0	0	0	0	0	0	0	0	0	0	0
2131	EXT1	ASD ID/DD	3	nonsynonymous SNV,synonymous SNV,splice-site mutation	8q24.11	exostosin glycosyltransferase 1	protein-coding	0	1	0	0	0	0	0	0	0	0	0	0	0	0	0	0	0	0	1	0	0	0	1
55777	MBD5	ASD ID/DD	6	frameshift deletion,stopgain,synonymous SNV	2q23.1	methyl-CpG binding domain protein 5	protein-coding	0	0	0	0	0	0	1	0	0	0	0	0	0	0	0	0	0	1	1	1	1	0	1
9919	SEC16A	ASD ID/DD	2	nonsynonymous SNV,frameshift insertion	9q34.3	SEC16 homolog A, endoplasmic reticulum export factor	protein-coding	1	0	0	0	0	0	1	1	0	0	0	0	0	0	0	0	0	0	0	0	1	0	0
11072	DUSP14	ASD ID/DD	2	nonsynonymous SNV,synonymous SNV	17q12	dual specificity phosphatase 14	protein-coding	1	0	0	0	0	0	0	0	0	0	0	0	0	0	0	0	0	0	0	0	0	0	0
9898	UBAP2L	ASD ID/DD	3	frameshift insertion,nonsynonymous SNV	1q21.3	ubiquitin associated protein 2 like	protein-coding	1	0	0	0	0	0	1	0	0	0	0	0	0	0	0	0	0	1	0	0	1	0	1
7099	TLR4	ASD ID/DD	3	nonsynonymous SNV,synonymous SNV	9q33.1	toll like receptor 4	protein-coding	0	0	0	0	0	0	0	0	0	0	0	0	1	0	0	0	0	0	0	0	0	0	0
718	C3	ASD ID/DD	3	nonsynonymous SNV	19p13.3	complement C3	protein-coding	0	0	0	0	0	0	0	0	0	0	0	0	1	0	0	0	0	0	0	0	0	0	1
58499	ZNF462	ASD ID/DD	6	frameshift deletion,nonsynonymous SNV	9q31.2	zinc finger protein 462	protein-coding	0	0	1	0	0	0	1	0	0	0	0	0	0	0	0	0	0	1	1	1	1	0	1
57707	TLDC1	ASD ID/DD	2	stopgain,nonsynonymous SNV	16q24.1	TBC/LysM-associated domain containing 1	protein-coding	0	0	0	0	0	0	0	0	0	0	0	0	0	0	0	0	0	0	0	0	0	0	0
7158	TP53BP1	ASD ID/DD	2	nonsynonymous SNV	15q15.3	tumor protein p53 binding protein 1	protein-coding	0	0	1	0	0	0	0	0	0	0	0	0	0	0	0	0	1	1	0	0	0	0	1
80128	TRIM46	ASD ID/DD	2	nonsynonymous SNV,synonymous SNV	1q22	tripartite motif containing 46	protein-coding	0	0	0	0	0	0	0	0	0	0	0	0	0	0	0	0	0	0	0	0	0	0	1
54822	TRPM7	ASD ID/DD	3	nonsynonymous SNV	15q21.2	transient receptor potential cation channel subfamily M member 7	protein-coding	0	1	0	0	0	0	0	0	0	0	0	0	0	0	0	0	0	0	0	0	0	0	0
26040	SETBP1	ASD ID/DD	9	frameshift insertion,nonsynonymous SNV,stopgain,synonymous SNV,frameshift deletion	18q12.3	SET binding protein 1	protein-coding	0	0	0	0	0	0	0	0	0	0	0	0	0	0	0	0	0	1	1	0	0	1	1
10964	IFI44L	ASD ID/DD	3	stopgain,nonsynonymous SNV	1p31.1	interferon induced protein 44 like	protein-coding	0	0	0	0	0	0	0	0	0	0	0	0	0	0	0	0	0	0	0	0	0	0	0
58986	TMEM8A	ASD ID/DD	3	nonsynonymous SNV,synonymous SNV	16p13.3	transmembrane protein 8A	protein-coding	0	0	0	0	0	0	0	0	0	0	0	0	0	0	0	0	0	0	0	0	0	0	0
56603	CYP26B1	ASD ID/DD	2	nonsynonymous SNV	2p13.2	cytochrome P450 family 26 subfamily B member 1	protein-coding	0	1	0	0	0	0	0	0	0	0	0	0	0	0	0	0	0	0	0	0	0	0	1
3915	LAMC1	ASD ID/DD	3	nonsynonymous SNV,synonymous SNV	1q25.3	laminin subunit gamma 1	protein-coding	0	1	0	0	1	0	0	0	0	0	0	0	1	0	0	0	0	0	0	0	0	0	1
5704	PSMC4	ASD ID/DD	3	nonsynonymous SNV,synonymous SNV	19q13.2	proteasome 26S subunit, ATPase 4	protein-coding	1	1	0	0	0	0	0	0	0	0	0	0	0	0	0	0	0	1	0	0	0	0	0
1594	CYP27B1	ASD ID/DD	2	nonsynonymous SNV	12q14.1	cytochrome P450 family 27 subfamily B member 1	protein-coding	0	0	0	0	0	0	0	0	0	0	0	0	0	0	0	0	0	0	0	0	0	0	0
65109	UPF3B	ASD ID/DD	5	frameshift insertion,frameshift deletion,nonsynonymous SNV	Xq24	UPF3B, regulator of nonsense mediated mRNA decay	protein-coding	1	0	0	0	0	0	0	1	0	0	0	0	0	0	0	0	0	1	1	1	0	0	1
23028	KDM1A	ASD ID/DD	2	nonsynonymous SNV	1p36.12	lysine demethylase 1A	protein-coding	0	1	0	0	0	0	0	0	0	0	0	0	0	0	0	0	1	1	0	0	0	0	1
8864	PER2	ASD ID/DD	3	stopgain,synonymous SNV	2q37.3	period circadian regulator 2	protein-coding	0	0	0	0	0	0	0	0	0	0	0	0	1	0	0	0	0	0	0	0	0	0	1
7812	CSDE1	ASD ID/DD	3	stopgain,synonymous SNV,nonsynonymous SNV	1p13.2	cold shock domain containing E1	protein-coding	0	0	0	0	0	0	0	1	0	0	0	0	0	0	0	0	0	1	0	0	0	0	1
10049	DNAJB6	ASD ID/DD	2	nonsynonymous SNV,stopgain	7q36.3	DnaJ heat shock protein family (Hsp40) member B6	protein-coding	0	1	0	0	0	0	0	0	1	0	0	0	0	0	0	0	0	0	0	0	0	0	1
89846	FGD3	ASD ID/DD	2	nonsynonymous SNV	9q22.31	FYVE, RhoGEF and PH domain containing 3	protein-coding	0	0	0	0	0	0	0	0	0	0	0	0	0	0	0	0	0	0	0	0	0	0	0
1108	CHD4	ASD ID/DD	11	nonsynonymous SNV,synonymous SNV,nonframeshift insertion,stopgain	12p13.31	chromodomain helicase DNA binding protein 4	protein-coding	1	0	0	0	0	0	1	0	0	0	0	0	0	0	0	0	1	1	1	0	0	0	1
7846	TUBA1A	ASD ID/DD	4	nonsynonymous SNV,frameshift deletion	12q13.12	tubulin alpha 1a	protein-coding	0	0	0	0	0	0	0	0	1	0	0	0	1	0	0	1	0	1	1	0	0	0	0
2257	FGF12	ASD ID/DD	2	synonymous SNV,nonsynonymous SNV	3q28-q29	fibroblast growth factor 12	protein-coding	0	0	0	0	0	0	0	0	0	0	0	0	0	0	0	0	0	0	0	0	0	0	0
9696	CROCC	ASD ID/DD	3	synonymous SNV,nonsynonymous SNV	1p36.13	ciliary rootlet coiled-coil, rootletin	protein-coding	0	0	0	0	0	0	0	0	0	0	0	0	0	0	0	0	0	0	0	0	0	0	0
343413	FCRL6	ASD ID/DD	2	splice-site mutation,frameshift substitution	1q23.2	Fc receptor like 6	protein-coding	0	0	0	0	0	0	0	0	0	0	0	0	0	0	0	0	0	0	0	0	0	0	0
57701	NCKAP5L	ASD ID/DD	3	synonymous SNV,nonsynonymous SNV	12q13.12	NCK associated protein 5 like	protein-coding	0	0	0	0	0	0	0	0	0	0	0	0	0	0	0	0	0	0	0	0	0	0	0
5754	PTK7	ASD ID/DD	5	nonsynonymous SNV,synonymous SNV,stopgain	6p21.1	protein tyrosine kinase 7 (inactive)	protein-coding	0	1	0	0	0	0	0	0	0	0	0	0	1	0	0	0	0	0	0	0	0	1	1
22996	TTC39A	ASD ID/DD	3	synonymous SNV,nonsynonymous SNV	1p32.3	tetratricopeptide repeat domain 39A	protein-coding	0	0	0	0	0	0	0	0	0	0	0	0	0	0	0	0	0	0	0	0	0	0	0
26278	SACS	ASD ID/DD	2	nonsynonymous SNV,frameshift deletion	13q12.12	sacsin molecular chaperone	protein-coding	0	0	0	0	0	0	0	0	0	0	0	0	0	0	0	0	0	0	1	0	0	0	0
6509	SLC1A4	ASD ID/DD	2	nonsynonymous SNV	2p14	solute carrier family 1 member 4	protein-coding	0	0	0	0	0	0	0	0	0	0	0	0	0	0	0	0	0	0	0	0	0	0	0
9645	MICAL2	ASD ID/DD	3	nonsynonymous SNV,synonymous SNV	11p15.3	microtubule associated monooxygenase, calponin and LIM domain containing 2	protein-coding	0	0	0	0	0	0	1	0	0	0	0	0	0	0	0	0	0	0	0	0	0	0	0
5651	TMPRSS15	ASD ID/DD	2	nonsynonymous SNV	21q21.1	transmembrane protease, serine 15	protein-coding	0	0	0	0	0	0	0	0	0	0	0	0	0	0	0	0	0	0	0	0	0	0	0
9479	MAPK8IP1	ASD ID/DD	2	nonsynonymous SNV,synonymous SNV	11p11.2	mitogen-activated protein kinase 8 interacting protein 1	protein-coding	0	1	0	0	0	0	1	0	0	0	0	0	1	0	0	0	0	0	0	0	0	0	1
56164	STK31	ASD ID/DD	2	nonsynonymous SNV	7p15.3	serine/threonine kinase 31	protein-coding	0	0	0	0	0	0	0	0	0	0	0	0	0	0	0	0	1	0	0	0	0	0	0
90507	SCRN2	ASD ID/DD	3	nonsynonymous SNV,synonymous SNV	17q21.32	secernin 2	protein-coding	0	0	0	0	0	0	0	0	0	0	0	0	0	0	0	0	0	0	0	0	0	0	0
83887	TTLL2	ASD ID/DD	2	nonsynonymous SNV	6q27	tubulin tyrosine ligase like 2	protein-coding	0	0	0	0	0	0	0	0	0	0	0	0	0	0	0	0	0	0	0	0	0	0	0
3012	HIST1H2AE	ASD ID/DD	2	nonsynonymous SNV	6p22.2	histone cluster 1 H2A family member e	protein-coding	0	0	0	0	0	0	0	0	1	0	0	0	0	0	0	0	0	1	0	0	0	0	0
55133	SRBD1	ASD ID/DD	4	nonsynonymous SNV	2p21	S1 RNA binding domain 1	protein-coding	0	0	0	0	0	0	0	0	0	0	0	0	0	0	0	0	0	1	0	0	0	0	0
23288	IQCE	ASD ID/DD	3	nonsynonymous SNV,synonymous SNV	7p22.3	IQ motif containing E	protein-coding	0	0	0	0	0	0	0	0	0	0	0	0	0	0	0	0	0	0	0	0	0	0	0
23139	MAST2	ASD ID/DD	4	synonymous SNV,nonsynonymous SNV	1p34.1	microtubule associated serine/threonine kinase 2	protein-coding	0	0	0	0	0	0	1	1	0	0	0	0	0	0	0	0	0	1	0	0	0	0	0
283635	FAM177A1	ASD ID/DD	2	splice-site mutation,synonymous SNV	14q13.2	family with sequence similarity 177 member A1	protein-coding	1	0	0	0	0	0	0	0	0	0	0	0	0	0	0	0	0	0	0	0	0	0	0
3071	NCKAP1L	ASD ID/DD	2	synonymous SNV	12q13.13-q13.2	NCK associated protein 1 like	protein-coding	0	0	0	0	0	0	0	0	0	0	0	0	0	0	0	0	0	0	0	0	0	0	1
5778	PTPN7	ASD ID/DD	2	nonsynonymous SNV	1q32.1	protein tyrosine phosphatase, non-receptor type 7	protein-coding	0	0	0	0	0	0	0	0	0	0	0	0	0	0	0	0	0	0	0	0	0	0	0
146754	DNAH2	ASD ID/DD	7	nonsynonymous SNV,synonymous SNV	17p13.1	dynein axonemal heavy chain 2	protein-coding	0	0	0	0	0	0	0	0	0	0	0	0	0	0	0	0	0	0	0	0	0	0	0
51277	DNAJC27	ASD ID/DD	2	nonsynonymous SNV	2p23.3	DnaJ heat shock protein family (Hsp40) member C27	protein-coding	0	0	0	0	0	0	0	0	0	0	0	0	0	0	0	0	0	0	0	0	0	0	0
92949	ADAMTSL1	ASD ID/DD	3	nonsynonymous SNV	9p22.2-p22.1	ADAMTS like 1	protein-coding	0	0	0	0	0	0	0	0	0	0	0	0	0	0	0	0	0	0	0	0	0	0	0
2561	GABRB2	ASD ID/DD	6	nonsynonymous SNV,synonymous SNV	5q34	gamma-aminobutyric acid type A receptor beta2 subunit	protein-coding	0	0	0	0	0	0	0	0	0	0	0	0	1	0	0	0	0	0	0	0	0	0	1
4125	MAN2B1	ASD ID/DD	5	nonsynonymous SNV,synonymous SNV	19p13.13	mannosidase alpha class 2B member 1	protein-coding	0	0	0	0	0	0	0	0	0	0	0	0	1	1	0	0	0	0	1	0	0	0	0
10886	NPFFR2	ASD ID/DD	3	nonsynonymous SNV,frameshift insertion	4q13.3	neuropeptide FF receptor 2	protein-coding	0	0	0	0	0	0	0	0	0	0	0	0	0	0	0	0	0	0	0	0	0	0	0
24	ABCA4	ASD ID/DD	3	synonymous SNV,nonsynonymous SNV	1p22.1	ATP binding cassette subfamily A member 4	protein-coding	0	0	0	0	0	0	0	0	0	0	0	0	0	0	0	0	0	0	0	0	0	0	0
3321	IGSF3	ASD ID/DD	2	stopgain,synonymous SNV	1p13.1	immunoglobulin superfamily member 3	protein-coding	0	0	0	0	0	0	0	0	0	0	0	0	0	0	0	0	0	1	0	0	0	0	1
23130	ATG2A	ASD ID/DD	3	nonsynonymous SNV	11q13.1	autophagy related 2A	protein-coding	1	0	0	0	0	0	1	0	0	0	0	0	0	0	0	0	0	0	0	0	0	0	1
8831	SYNGAP1	ASD ID/DD	37	frameshift deletion,nonsynonymous SNV,stopgain,synonymous SNV,frameshift insertion,splice-site mutation	6p21.32	synaptic Ras GTPase activating protein 1	protein-coding	0	1	0	0	0	0	1	0	1	0	1	0	1	1	0	1	0	0	1	1	1	1	1
2175	FANCA	ASD ID/DD	3	nonsynonymous SNV,synonymous SNV	16q24.3	Fanconi anemia complementation group A	protein-coding	0	0	0	0	0	0	0	0	0	0	0	0	0	0	0	0	0	1	1	0	0	0	0
57498	KIDINS220	ASD ID/DD	3	nonsynonymous SNV,frameshift insertion	2p25.1	kinase D interacting substrate 220	protein-coding	0	1	0	0	0	0	0	0	0	0	0	0	0	0	0	0	0	0	1	0	0	0	0
196385	DNAH10	ASD ID/DD	5	nonsynonymous SNV,synonymous SNV	12q24.31	dynein axonemal heavy chain 10	protein-coding	0	0	0	0	0	0	0	0	0	0	0	0	0	0	0	0	0	0	0	0	0	0	0
47	ACLY	ASD ID/DD	3	synonymous SNV,nonsynonymous SNV	17q21.2	ATP citrate lyase	protein-coding	1	1	0	0	0	0	1	0	1	0	0	0	0	0	0	0	0	1	0	0	0	0	1
5332	PLCB4	ASD ID/DD	3	synonymous SNV,nonsynonymous SNV	20p12.3-p12.2	phospholipase C beta 4	protein-coding	0	1	0	0	0	0	0	0	0	0	0	0	1	0	0	0	0	0	0	0	0	0	0
10331	B3GNT3	ASD ID/DD	2	nonsynonymous SNV,synonymous SNV	19p13.11	UDP-GlcNAc:betaGal beta-1,3-N-acetylglucosaminyltransferase 3	protein-coding	0	0	0	0	0	0	0	0	0	0	0	0	1	0	0	0	0	0	0	0	0	0	0
27253	PCDH17	ASD ID/DD	2	nonsynonymous SNV	13q21.1	protocadherin 17	protein-coding	0	0	0	0	1	0	0	0	0	0	0	0	1	0	0	0	0	0	0	0	0	0	1
64518	TEKT3	ASD ID/DD	3	nonsynonymous SNV,synonymous SNV	17p12	tektin 3	protein-coding	0	0	0	0	0	0	0	0	0	0	0	0	0	0	0	0	0	0	0	0	0	0	0
6095	RORA	ASD ID/DD	3	nonsynonymous SNV,synonymous SNV	15q22.2	RAR related orphan receptor A	protein-coding	0	1	1	0	0	0	0	0	0	0	0	0	1	0	0	0	0	0	1	0	0	0	1
4297	KMT2A	ASD ID/DD	38	nonsynonymous SNV,frameshift deletion,frameshift insertion,splice-site mutation,stopgain,nonframeshift deletion	11q23.3	lysine methyltransferase 2A	protein-coding	0	1	0	0	0	0	1	0	0	0	0	0	1	0	0	0	0	0	1	1	1	1	1
4645	MYO5B	ASD ID/DD	4	synonymous SNV,nonsynonymous SNV	18q21.1	myosin VB	protein-coding	0	0	0	0	0	0	0	0	0	0	0	0	0	0	0	0	0	0	1	0	0	0	0
284656	EPHA10	ASD ID/DD	3	synonymous SNV,nonsynonymous SNV	1p34.3	EPH receptor A10	protein-coding	0	0	0	0	1	0	0	0	0	0	0	0	0	0	0	0	0	0	0	0	0	0	0
7716	VEZF1	ASD ID/DD	4	nonsynonymous SNV,frameshift deletion,stopgain	17q22	vascular endothelial zinc finger 1	protein-coding	0	1	1	0	0	0	0	0	0	0	0	0	0	0	0	0	0	1	0	0	0	0	1
89876	MAATS1	ASD ID/DD	2	nonsynonymous SNV	3q13.33	MYCBP associated and testis expressed 1	protein-coding	0	0	0	0	0	0	0	0	0	0	0	0	0	0	0	0	0	0	0	0	0	0	0
196743	PAOX	ASD ID/DD	4	nonsynonymous SNV	10q26.3	polyamine oxidase	protein-coding	0	0	0	0	0	0	0	0	0	0	0	0	0	0	0	0	0	0	0	0	0	0	0
774	CACNA1B	ASD ID/DD	3	nonsynonymous SNV,synonymous SNV	9q34.3	calcium voltage-gated channel subunit alpha1 B	protein-coding	0	1	0	0	0	0	1	0	1	0	0	0	1	1	1	1	0	0	0	0	0	0	1
4306	NR3C2	ASD ID/DD	4	nonsynonymous SNV,stopgain	4q31.23	nuclear receptor subfamily 3 group C member 2	protein-coding	1	1	1	0	0	0	0	0	0	0	0	0	0	0	0	0	0	0	0	0	0	0	1
6929	TCF3	ASD ID/DD	4	frameshift insertion,nonsynonymous SNV	19p13.3	transcription factor 3	protein-coding	0	1	0	0	0	0	0	0	0	0	0	0	0	0	0	0	0	1	0	0	1	0	0
57605	PITPNM2	ASD ID/DD	4	nonsynonymous SNV,synonymous SNV	12q24.31	phosphatidylinositol transfer protein membrane associated 2	protein-coding	0	0	0	0	0	0	1	0	0	0	0	0	0	0	0	0	0	0	0	0	0	0	1
54535	CCHCR1	ASD ID/DD	2	nonsynonymous SNV,synonymous SNV	6p21.33	coiled-coil alpha-helical rod protein 1	protein-coding	0	0	0	0	0	0	0	0	0	0	0	0	0	0	0	0	0	0	0	0	0	0	0
136227	COL26A1	ASD ID/DD	2	unknown	7q22.1	collagen type XXVI alpha 1 chain	protein-coding	0	0	0	0	0	0	0	0	0	0	0	0	0	0	0	0	0	0	0	0	0	0	0
1497	CTNS	ASD ID/DD	2	synonymous SNV,nonsynonymous SNV	17p13.2	cystinosin, lysosomal cystine transporter	protein-coding	0	0	0	0	0	0	0	0	0	0	0	0	1	0	0	0	0	0	1	0	0	0	0
23522	KAT6B	ASD ID/DD	19	nonsynonymous SNV,frameshift deletion,splice-site mutation,stopgain,synonymous SNV	10q22.2	lysine acetyltransferase 6B	protein-coding	0	1	0	0	0	0	0	0	0	0	0	0	0	0	0	0	1	1	1	0	1	0	1
54892	NCAPG2	ASD ID/DD	3	synonymous SNV,nonsynonymous SNV	7q36.3	non-SMC condensin II complex subunit G2	protein-coding	0	1	0	0	0	0	0	0	0	0	0	0	0	0	0	0	0	1	0	0	0	0	1
83450	DRC3	ASD ID/DD	2	synonymous SNV,nonsynonymous SNV	17p11.2	dynein regulatory complex subunit 3	protein-coding	0	0	0	0	0	0	0	0	0	0	0	0	0	0	0	0	0	0	0	0	0	0	0
140685	ZBTB46	ASD ID/DD	2	synonymous SNV,nonsynonymous SNV	20q13.33	zinc finger and BTB domain containing 46	protein-coding	0	0	1	0	0	0	0	0	0	0	0	0	0	0	0	0	0	0	0	0	0	0	0
2802	GOLGA3	ASD ID/DD	4	nonsynonymous SNV	12q24.33	golgin A3	protein-coding	1	0	0	0	0	0	0	0	0	0	0	0	0	0	0	0	0	0	0	0	0	0	1
55775	TDP1	ASD ID/DD	2	nonsynonymous SNV,frameshift deletion	14q32.11	tyrosyl-DNA phosphodiesterase 1	protein-coding	0	0	0	0	0	0	0	0	0	0	0	0	0	0	0	0	0	1	0	0	0	0	0
4583	MUC2	ASD ID/DD	13	nonsynonymous SNV,synonymous SNV	11p15.5	mucin 2, oligomeric mucus/gel-forming	protein-coding	0	0	0	0	0	0	0	0	0	0	0	0	0	0	0	0	0	0	0	0	0	0	0
6461	SHB	ASD ID/DD	2	nonsynonymous SNV	9p13.1	SH2 domain containing adaptor protein B	protein-coding	0	1	0	0	0	0	0	0	0	0	0	0	0	0	0	0	0	1	0	0	0	0	0
2027	ENO3	ASD ID/DD	3	stopgain,frameshift deletion,synonymous SNV	17p13.2	enolase 3	protein-coding	0	0	0	0	0	0	0	0	1	0	0	0	0	0	0	0	0	0	0	0	0	0	0
63925	ZNF335	ASD ID/DD	3	nonsynonymous SNV,synonymous SNV	20q13.12	zinc finger protein 335	protein-coding	1	1	1	0	0	0	0	0	0	0	0	0	0	0	0	0	0	0	0	0	0	0	0
9735	KNTC1	ASD ID/DD	2	synonymous SNV,nonsynonymous SNV	12q24.31	kinetochore associated 1	protein-coding	0	0	0	0	0	0	0	0	0	0	0	0	0	0	0	0	0	1	0	0	0	0	0
24148	PRPF6	ASD ID/DD	3	nonsynonymous SNV,synonymous SNV	20q13.33	pre-mRNA processing factor 6	protein-coding	1	0	0	0	0	0	0	0	0	0	0	0	0	0	0	0	0	1	0	0	0	0	0
6332	SCN7A	ASD ID/DD	2	stopgain,nonsynonymous SNV	2q24.3	sodium voltage-gated channel alpha subunit 7	protein-coding	0	0	0	0	0	0	0	0	0	0	0	0	0	0	0	0	0	0	0	0	0	0	0
27231	NMRK2	ASD ID/DD	2	synonymous SNV	19p13.3	nicotinamide riboside kinase 2	protein-coding	0	0	0	0	0	0	0	0	0	0	0	0	0	0	0	0	0	0	0	0	0	0	0
10152	ABI2	ASD ID/DD	3	nonsynonymous SNV	2q33.2	abl interactor 2	protein-coding	0	0	0	0	0	0	0	1	0	0	0	0	1	0	0	0	0	0	0	0	0	0	1
639	PRDM1	ASD ID/DD	3	synonymous SNV,nonsynonymous SNV	6q21	PR/SET domain 1	protein-coding	0	1	1	0	0	0	0	0	0	0	0	0	0	0	0	0	1	0	0	0	0	0	1
80005	DOCK5	ASD ID/DD	3	nonsynonymous SNV,frameshift insertion	8p21.2	dedicator of cytokinesis 5	protein-coding	0	0	0	0	0	0	0	0	0	0	0	0	0	0	0	0	0	0	0	0	0	0	0
80709	AKNA	ASD ID/DD	3	nonsynonymous SNV,nonframeshift deletion	9q32	AT-hook transcription factor	protein-coding	0	0	0	0	0	0	0	0	0	0	0	0	0	0	0	0	0	0	0	0	0	0	0
55231	CCDC87	ASD ID/DD	3	nonsynonymous SNV,stopgain	11q13.2	coiled-coil domain containing 87	protein-coding	0	0	0	0	0	0	0	0	0	0	0	0	0	0	0	0	0	0	0	0	0	0	0
1829	DSG2	ASD ID/DD	2	nonsynonymous SNV,nonframeshift deletion	18q12.1	desmoglein 2	protein-coding	0	1	0	0	1	0	0	0	0	0	0	0	0	0	0	0	0	1	0	0	0	0	0
9856	KIAA0319	ASD ID/DD	2	synonymous SNV,nonsynonymous SNV	6p22.3	KIAA0319	protein-coding	0	0	0	0	0	0	0	0	0	0	0	0	0	0	0	0	0	0	0	0	0	0	0
128239	IQGAP3	ASD ID/DD	3	nonsynonymous SNV	1q22	IQ motif containing GTPase activating protein 3	protein-coding	0	0	0	0	0	0	0	0	0	0	0	0	0	0	0	0	0	1	0	0	0	0	0
7003	TEAD1	ASD ID/DD	2	nonsynonymous SNV,synonymous SNV	11p15.3	TEA domain transcription factor 1	protein-coding	0	1	1	0	0	0	0	1	0	0	0	0	0	0	0	0	0	0	0	0	0	0	0
22871	NLGN1	ASD ID/DD	2	nonsynonymous SNV	3q26.31	neuroligin 1	protein-coding	0	0	0	0	1	0	0	0	1	0	0	0	0	0	0	0	0	0	0	0	0	0	0
9749	PHACTR2	ASD ID/DD	2	nonframeshift deletion,nonsynonymous SNV	6q24.2	phosphatase and actin regulator 2	protein-coding	0	0	0	0	0	0	0	0	0	0	0	0	0	0	0	0	0	0	0	0	0	0	0
23414	ZFPM2	ASD ID/DD	3	nonsynonymous SNV	8q23.1	zinc finger protein, FOG family member 2	protein-coding	0	1	1	0	0	0	0	0	0	0	0	0	0	0	0	0	0	0	1	0	0	0	1
8189	SYMPK	ASD ID/DD	2	nonsynonymous SNV,synonymous SNV	19q13.32	symplekin	protein-coding	1	0	0	0	0	0	1	0	0	0	0	0	0	0	0	0	0	0	0	0	0	0	1
55605	KIF21A	ASD ID/DD	4	frameshift insertion,nonsynonymous SNV,synonymous SNV	12q12	kinesin family member 21A	protein-coding	0	0	0	0	0	0	1	1	0	0	0	0	0	0	0	0	0	0	0	0	0	0	0
51380	CSAD	ASD BD	2	nonsynonymous SNV	12q13.13	cysteine sulfinic acid decarboxylase	protein-coding	0	0	0	0	0	0	0	0	0	0	0	0	0	0	0	0	0	0	0	0	0	0	0
23469	PHF3	ASD BD	4	nonsynonymous SNV,frameshift deletion	6q12	PHD finger protein 3	protein-coding	0	0	0	0	0	0	0	0	0	0	0	0	0	0	0	0	1	1	0	0	1	0	1
10497	UNC13B	ASD BD	3	synonymous SNV,splice-site mutation	9p13.3	unc-13 homolog B	protein-coding	0	0	0	0	0	0	0	0	0	0	0	0	0	0	0	0	0	0	0	0	0	0	0
9407	TMPRSS11D	ASD BD	2	nonsynonymous SNV	4q13.2	transmembrane protease, serine 11D	protein-coding	0	0	0	0	0	0	0	0	0	0	0	0	0	0	0	0	0	0	0	0	0	0	0
164592	CCDC116	ASD BD	2	synonymous SNV,nonsynonymous SNV	22q11.21	coiled-coil domain containing 116	protein-coding	0	0	0	0	0	0	0	0	0	0	0	0	0	0	0	0	0	0	0	0	0	0	0
399687	MYO18A	ID/DD SCZ	4	nonsynonymous SNV	17q11.2	myosin XVIIIA	protein-coding	0	0	0	0	0	0	1	1	1	0	0	0	0	0	0	0	0	0	0	0	0	0	1
90627	STARD13	ID/DD SCZ	2	nonsynonymous SNV,synonymous SNV	13q13.1-q13.2	StAR related lipid transfer domain containing 13	protein-coding	0	0	0	0	0	0	0	0	0	0	0	0	0	0	0	0	0	0	0	0	0	0	0
9600	PITPNM1	ID/DD SCZ	3	nonsynonymous SNV	11q13.2	phosphatidylinositol transfer protein membrane associated 1	protein-coding	0	0	0	0	0	0	1	0	0	0	0	0	0	0	0	0	0	0	0	0	0	0	0
8344	HIST1H2BE	ID/DD SCZ	2	nonsynonymous SNV	6p22.2	histone cluster 1 H2B family member e	protein-coding	0	0	0	0	0	0	0	0	0	0	0	0	0	0	0	0	0	0	0	0	0	0	0
85315	PAQR8	ID/DD SCZ	3	nonsynonymous SNV,synonymous SNV	6p12.2	progestin and adipoQ receptor family member 8	protein-coding	0	0	0	0	0	0	0	0	0	0	0	0	0	0	0	0	0	0	0	0	0	0	0
6101	RP1	ID/DD SCZ	2	synonymous SNV,nonsynonymous SNV	8q11.23-q12.1	RP1, axonemal microtubule associated	protein-coding	0	0	0	0	0	0	0	0	0	0	0	0	0	0	0	0	0	0	0	0	0	0	0
79085	SLC25A23	ID/DD SCZ	2	synonymous SNV,nonsynonymous SNV	19p13.3	solute carrier family 25 member 23	protein-coding	0	0	0	0	0	0	1	0	0	0	0	0	0	0	0	0	0	0	0	0	0	0	0
1855	DVL1	ID/DD SCZ	4	nonsynonymous SNV,synonymous SNV	1p36.33	dishevelled segment polarity protein 1	protein-coding	0	0	0	0	0	0	0	0	0	0	0	0	1	0	0	0	0	0	0	0	0	0	0
23648	SSBP3	ID/DD SCZ	3	nonsynonymous SNV,stopgain,splice-site mutation	1p32.3	single stranded DNA binding protein 3	protein-coding	0	1	0	0	0	0	0	1	0	0	0	0	0	0	0	0	0	0	0	0	0	0	1
84166	NLRC5	ID/DD SCZ	4	nonsynonymous SNV	16q13	NLR family CARD domain containing 5	protein-coding	0	0	0	0	0	0	0	0	0	0	0	0	0	0	0	0	0	0	0	0	0	0	0
51780	KDM3B	ID/DD SCZ	4	nonsynonymous SNV,frameshift deletion,synonymous SNV	5q31.2	lysine demethylase 3B	protein-coding	0	0	0	0	0	0	0	0	1	0	0	0	0	0	0	0	1	1	0	0	0	0	1
6744	SSFA2	ID/DD SCZ	2	synonymous SNV,nonsynonymous SNV	2q31.3	sperm specific antigen 2	protein-coding	0	0	0	0	0	0	0	0	0	0	0	0	1	0	0	0	0	0	0	0	0	0	0
48	ACO1	ID/DD SCZ	2	nonsynonymous SNV	9p21.1	aconitase 1	protein-coding	0	1	0	0	0	0	0	0	0	0	0	0	0	0	0	0	0	0	0	0	0	0	0
28981	IFT81	ID/DD SCZ	2	nonsynonymous SNV	12q24.11	intraflagellar transport 81	protein-coding	0	0	0	0	0	0	0	0	0	0	0	0	0	0	0	0	0	1	0	0	0	0	0
57221	ARFGEF3	ID/DD SCZ	5	nonsynonymous SNV,synonymous SNV	6q23.3-q24.1	ARFGEF family member 3	protein-coding	0	0	0	0	0	0	1	0	0	0	0	0	0	0	0	0	0	0	0	0	0	0	1
158038	LINGO2	ID/DD SCZ	2	synonymous SNV,nonframeshift deletion	9p21.2-p21.1	leucine rich repeat and Ig domain containing 2	protein-coding	0	0	0	0	0	0	0	0	0	0	0	0	0	0	0	0	0	0	0	0	0	0	0
26531	OR11A1	ID/DD SCZ	2	synonymous SNV,nonsynonymous SNV	6p22.1	olfactory receptor family 11 subfamily A member 1	protein-coding	0	0	0	0	0	0	0	0	0	0	0	0	0	0	0	0	0	0	0	0	0	0	0
51574	LARP7	ID/DD SCZ	3	nonsynonymous SNV,frameshift deletion	4q25	La ribonucleoprotein domain family member 7	protein-coding	1	0	0	0	0	0	0	0	0	0	0	0	0	0	0	0	0	0	1	0	0	0	0
338821	SLCO1B7	ID/DD SCZ	2	nonsynonymous SNV,synonymous SNV	12p12.2	solute carrier organic anion transporter family member 1B7 (putative)	protein-coding	0	0	0	0	0	0	0	0	0	0	0	0	0	0	0	0	0	0	0	0	0	0	0
122706	PSMB11	ID/DD SCZ	2	synonymous SNV,nonsynonymous SNV	14q11.2	proteasome subunit beta 11	protein-coding	0	0	0	0	0	0	0	0	0	0	0	0	0	0	0	0	0	0	0	0	0	0	0
10427	SEC24B	ID/DD SCZ	2	synonymous SNV,nonsynonymous SNV	4q25	SEC24 homolog B, COPII coat complex component	protein-coding	1	1	0	0	0	0	0	1	0	0	0	0	0	0	0	0	0	1	0	0	0	0	1
9993	DGCR2	ID/DD SCZ	2	nonsynonymous SNV	22q11.21	DiGeorge syndrome critical region gene 2	protein-coding	1	0	0	0	0	0	1	0	0	0	0	0	0	0	0	0	0	0	0	0	0	0	0
23376	UFL1	ID/DD SCZ	2	stopgain,nonsynonymous SNV	6q16.1	UFM1 specific ligase 1	protein-coding	1	0	0	0	0	0	0	0	0	0	0	0	0	0	0	0	0	0	0	0	0	0	0
55588	MED29	ID/DD SCZ	2	nonsynonymous SNV,synonymous SNV	19q13.2	mediator complex subunit 29	protein-coding	1	0	0	0	0	0	0	0	0	0	0	0	0	0	0	0	0	0	0	0	0	0	0
79832	QSER1	ID/DD SCZ	3	nonsynonymous SNV	11p13	glutamine and serine rich 1	protein-coding	0	0	0	0	0	0	0	0	0	0	0	0	0	0	0	0	0	1	0	0	0	0	1
79672	FN3KRP	ID/DD SCZ	2	nonsynonymous SNV,synonymous SNV	17q25.3	fructosamine 3 kinase related protein	protein-coding	0	0	0	0	0	0	0	0	0	0	0	0	0	0	0	0	0	0	0	0	0	0	0
5916	RARG	ID/DD SCZ	2	stopgain	12q13.13	retinoic acid receptor gamma	protein-coding	0	0	1	0	0	0	0	0	0	0	0	0	0	0	0	0	0	0	0	0	0	0	1
344148	NCKAP5	ID/DD SCZ	4	synonymous SNV,nonsynonymous SNV	2q21.2	NCK associated protein 5	protein-coding	0	0	0	0	0	0	0	0	0	0	0	0	0	0	0	0	0	0	0	0	0	0	0
2532	ACKR1	ID/DD SCZ	3	frameshift deletion,nonsynonymous SNV,synonymous SNV	1q23.2	atypical chemokine receptor 1 (Duffy blood group)	protein-coding	0	0	0	0	0	0	0	0	0	0	0	0	0	0	0	0	0	0	0	0	0	0	0
84842	HPDL	ID/DD SCZ	2	nonsynonymous SNV,synonymous SNV	1p34.1	4-hydroxyphenylpyruvate dioxygenase like	protein-coding	0	0	0	0	0	0	0	0	0	0	0	0	0	0	0	0	0	0	0	0	0	0	0
143458	LDLRAD3	ID/DD SCZ	2	nonsynonymous SNV,synonymous SNV	11p13	low density lipoprotein receptor class A domain containing 3	protein-coding	0	0	0	0	0	0	0	0	0	0	0	0	0	0	0	0	0	0	0	0	0	0	0
55717	WDR11	ID/DD SCZ	2	nonsynonymous SNV,frameshift deletion	10q26.12	WD repeat domain 11	protein-coding	0	0	0	0	0	0	0	0	0	0	0	0	0	0	0	0	0	0	0	0	0	0	0
64781	CERK	ID/DD SCZ	3	nonsynonymous SNV	22q13.31	ceramide kinase	protein-coding	1	0	0	0	0	0	0	0	0	0	0	0	1	0	0	0	0	0	0	0	0	0	0
3008	HIST1H1E	ID/DD SCZ	3	frameshift deletion,frameshift insertion	6p22.2	histone cluster 1 H1 family member e	protein-coding	0	0	0	0	0	0	0	0	1	0	0	0	0	0	0	0	0	1	1	0	0	0	0
9821	RB1CC1	ID/DD SCZ	2	frameshift deletion,nonsynonymous SNV	8q11.23	RB1 inducible coiled-coil 1	protein-coding	1	1	0	0	0	0	0	0	0	0	0	0	0	0	0	0	0	0	0	0	0	0	1
7809	BSND	ID/DD SCZ	2	nonsynonymous SNV	1p32.3	barttin CLCNK type accessory beta subunit	protein-coding	0	1	0	0	0	0	0	0	0	0	0	0	0	0	0	0	0	0	1	0	0	0	0
113	ADCY7	ID/DD SCZ	3	synonymous SNV,nonsynonymous SNV,stoploss	16q12.1	adenylate cyclase 7	protein-coding	0	1	0	0	0	0	0	0	0	0	0	0	1	0	0	0	0	0	0	0	0	0	0
84070	FAM186B	ID/DD SCZ	2	synonymous SNV,nonsynonymous SNV	12q13.12	family with sequence similarity 186 member B	protein-coding	0	0	0	0	0	0	0	0	0	0	0	0	0	0	0	0	0	0	0	0	0	0	0
5140	PDE3B	ID/DD SCZ	2	nonsynonymous SNV	11p15.2	phosphodiesterase 3B	protein-coding	0	0	0	0	0	0	0	0	0	0	0	0	0	0	0	0	0	0	0	0	0	0	0
23310	NCAPD3	ID/DD SCZ	3	nonsynonymous SNV,synonymous SNV	11q25	non-SMC condensin II complex subunit D3	protein-coding	0	0	0	0	0	0	0	0	0	0	0	0	0	0	0	0	0	1	0	0	0	0	0
5660	PSAP	ID/DD SCZ	3	nonsynonymous SNV	10q22.1	prosaposin	protein-coding	0	1	0	0	0	0	1	0	0	0	0	0	1	1	0	0	0	0	0	0	0	0	1
23452	ANGPTL2	ID/DD SCZ	2	synonymous SNV	9q33.3	angiopoietin like 2	protein-coding	0	0	0	0	0	0	0	0	0	0	0	0	0	0	0	0	0	0	0	0	0	0	0
4796	TONSL	ID/DD SCZ	3	nonsynonymous SNV	8q24.3	tonsoku like, DNA repair protein	protein-coding	0	0	0	0	0	0	0	0	0	0	0	0	0	0	0	0	0	0	0	0	0	0	0
9905	SGSM2	ID/DD SCZ	2	nonsynonymous SNV	17p13.3	small G protein signaling modulator 2	protein-coding	0	0	0	0	0	0	1	0	0	0	0	0	0	0	0	0	0	0	0	0	0	0	0
5287	PIK3C2B	ID/DD SCZ	3	frameshift deletion,nonsynonymous SNV	1q32.1	phosphatidylinositol-4-phosphate 3-kinase catalytic subunit type 2 beta	protein-coding	0	0	0	0	0	0	0	0	0	0	0	0	0	0	0	0	0	1	0	0	0	0	1
10845	CLPX	ID/DD SCZ	2	nonsynonymous SNV	15q22.31	caseinolytic mitochondrial matrix peptidase chaperone subunit	protein-coding	1	0	0	0	0	0	0	0	0	0	0	0	0	0	0	0	0	0	0	0	0	0	0
2064	ERBB2	ID/DD SCZ	2	nonsynonymous SNV	17q12	erb-b2 receptor tyrosine kinase 2	protein-coding	0	1	0	0	0	0	0	0	0	0	0	0	0	0	0	0	0	0	0	0	0	0	1
23274	CLEC16A	ID/DD SCZ	2	nonsynonymous SNV,synonymous SNV	16p13.13	C-type lectin domain containing 16A	protein-coding	0	0	0	0	0	0	1	0	0	0	0	0	0	0	0	0	0	0	0	0	0	0	0
54438	GFOD1	ID/DD SCZ	3	nonsynonymous SNV	6p23	glucose-fructose oxidoreductase domain containing 1	protein-coding	0	0	0	0	0	0	0	0	0	0	0	0	0	0	0	0	0	0	0	0	0	0	0
27145	FILIP1	ID/DD SCZ	2	nonsynonymous SNV,synonymous SNV	6q14.1	filamin A interacting protein 1	protein-coding	0	0	0	0	0	0	0	0	0	0	0	0	0	0	0	0	0	0	0	0	0	0	0
23228	PLCL2	ID/DD SCZ	2	nonsynonymous SNV	3p24.3	phospholipase C like 2	protein-coding	0	0	0	0	0	0	0	0	0	0	0	0	0	0	0	0	0	0	0	0	0	0	1
10826	FAXDC2	ID/DD SCZ	2	nonsynonymous SNV	5q33.2	fatty acid hydroxylase domain containing 2	protein-coding	0	0	0	0	0	0	0	0	0	0	0	0	0	0	0	0	0	0	0	0	0	0	0
23076	RRP1B	ID/DD SCZ	2	nonsynonymous SNV	21q22.3	ribosomal RNA processing 1B	protein-coding	0	0	0	0	0	0	0	0	0	0	0	0	0	0	0	0	0	1	0	0	0	0	0
55572	FOXRED1	ID/DD SCZ	2	nonsynonymous SNV,synonymous SNV	11q24.2	FAD dependent oxidoreductase domain containing 1	protein-coding	1	0	0	0	0	0	0	0	0	0	0	0	0	0	0	0	0	0	1	0	0	0	0
90288	EFCAB12	ID/DD SCZ	2	synonymous SNV	3q21.3	EF-hand calcium binding domain 12	protein-coding	0	0	0	0	0	0	0	0	0	0	0	0	0	0	0	0	0	0	0	0	0	0	0
145942	TMCO5A	ID/DD SCZ	2	synonymous SNV,nonsynonymous SNV	15q14	transmembrane and coiled-coil domains 5A	protein-coding	0	0	0	0	0	0	0	0	0	0	0	0	0	0	0	0	0	0	0	0	0	0	0
9498	SLC4A8	ID/DD SCZ	3	nonsynonymous SNV,nonframeshift insertion	12q13.13	solute carrier family 4 member 8	protein-coding	0	0	0	0	0	0	1	0	0	0	0	0	0	0	0	0	0	0	0	0	0	0	1
6650	CAPN15	ID/DD SCZ	4	nonsynonymous SNV	16p13.3	calpain 15	protein-coding	0	0	0	0	0	0	0	0	0	0	0	0	0	0	0	0	0	0	0	0	0	0	1
2077	ERF	ID/DD SCZ	4	nonsynonymous SNV,nonframeshift deletion	19q13.2	ETS2 repressor factor	protein-coding	0	1	0	0	0	0	0	0	0	0	0	0	0	0	0	0	0	0	0	0	0	0	0
157285	PRAG1	ID/DD SCZ	4	nonsynonymous SNV,stopgain,synonymous SNV	8p23.1	PEAK1 related, kinase-activating pseudokinase 1	protein-coding	0	0	0	0	0	0	0	0	0	0	0	0	0	0	0	0	0	0	0	0	0	0	0
26019	UPF2	ID/DD SCZ	2	nonsynonymous SNV,frameshift deletion	10p14	UPF2, regulator of nonsense mediated mRNA decay	protein-coding	1	1	0	0	0	0	0	0	0	0	0	0	0	0	0	0	0	0	0	0	0	0	1
2903	GRIN2A	ID/DD SCZ	7	nonsynonymous SNV,synonymous SNV	16p13.2	glutamate ionotropic receptor NMDA type subunit 2A	protein-coding	0	0	0	0	0	0	1	0	1	0	0	0	1	1	0	0	0	0	1	0	0	0	1
54209	TREM2	ID/DD SCZ	2	nonsynonymous SNV	6p21.1	triggering receptor expressed on myeloid cells 2	protein-coding	0	0	0	0	0	0	0	0	0	0	0	0	0	0	0	0	0	0	0	0	0	0	0
146279	TEKT5	ID/DD SCZ	2	nonsynonymous SNV	16p13.13	tektin 5	protein-coding	0	0	0	0	0	0	0	0	0	0	0	0	0	0	0	0	0	0	0	0	0	0	0
11273	ATXN2L	ID/DD SCZ	3	synonymous SNV,nonsynonymous SNV	16p11.2	ataxin 2 like	protein-coding	1	0	0	0	0	0	0	0	0	0	0	0	0	0	0	0	0	0	0	0	0	0	1
22897	CEP164	ID/DD SCZ	2	nonsynonymous SNV	11q23.3	centrosomal protein 164	protein-coding	0	0	0	0	0	0	0	0	0	0	0	0	0	0	0	0	0	0	0	0	0	0	0
54798	DCHS2	ID/DD SCZ	2	nonsynonymous SNV	4q31.3	dachsous cadherin-related 2	protein-coding	0	0	0	0	1	0	0	0	0	0	0	0	0	0	0	0	0	0	0	0	0	0	0
58511	DNASE2B	ID/DD SCZ	2	nonsynonymous SNV	1p31.1-p22.3	deoxyribonuclease 2 beta	protein-coding	0	0	0	0	0	0	0	0	0	0	0	0	0	0	0	0	0	0	0	0	0	0	0
5949	RBP3	ID/DD SCZ	2	nonsynonymous SNV	10q11.22	retinol binding protein 3	protein-coding	0	0	0	0	0	0	0	0	0	0	0	0	0	0	0	0	0	0	0	0	0	0	0
9711	RUBCN	ID/DD SCZ	2	nonsynonymous SNV	3q29	RUN and cysteine rich domain containing beclin 1 interacting protein	protein-coding	0	0	0	0	0	0	1	0	0	0	0	0	0	0	0	0	0	0	0	0	0	0	0
929	CD14	ID/DD SCZ	3	nonsynonymous SNV,synonymous SNV	5q31.3	CD14 molecule	protein-coding	0	0	0	0	0	0	0	0	0	0	0	0	0	0	0	0	0	0	0	0	0	0	0
7453	WARS	ID/DD SCZ	3	nonsynonymous SNV	14q32.2	tryptophanyl-tRNA synthetase	protein-coding	0	0	0	0	0	0	0	0	0	0	0	0	0	0	0	0	0	0	0	0	0	0	1
55466	DNAJA4	ID/DD SCZ	2	synonymous SNV,nonsynonymous SNV	15q25.1	DnaJ heat shock protein family (Hsp40) member A4	protein-coding	0	0	0	0	0	0	0	0	0	0	0	0	0	0	0	0	0	0	0	0	0	0	0
431705	ASTL	ID/DD SCZ	2	nonsynonymous SNV	2q11.2	astacin like metalloendopeptidase	protein-coding	0	0	0	0	0	0	0	0	0	0	0	0	0	0	0	0	0	0	0	0	0	0	0
65250	C5orf42	ID/DD SCZ	2	nonsynonymous SNV	5p13.2	chromosome 5 open reading frame 42	protein-coding	0	0	0	0	0	0	0	0	0	0	0	0	0	0	0	0	0	0	1	0	0	0	0
284391	ZNF844	ID/DD SCZ	2	nonsynonymous SNV,synonymous SNV	19p13.2	zinc finger protein 844	protein-coding	0	0	0	0	0	0	0	0	0	0	0	0	0	0	0	0	0	0	0	0	0	0	0
9585	KIF20B	ID/DD SCZ	2	synonymous SNV,nonsynonymous SNV	10q23.31	kinesin family member 20B	protein-coding	0	0	0	0	0	0	0	0	0	0	0	0	0	0	0	0	0	1	0	0	0	0	0
1180	CLCN1	ID/DD SCZ	2	frameshift deletion,nonsynonymous SNV	7q34	chloride voltage-gated channel 1	protein-coding	0	0	0	0	0	0	0	0	0	0	0	0	1	0	0	0	0	0	0	0	0	0	0
415	ARSE	ID/DD SCZ	2	nonsynonymous SNV,synonymous SNV	Xp22.33	arylsulfatase E (chondrodysplasia punctata 1)	protein-coding	0	0	0	0	0	0	0	0	0	0	0	0	0	0	0	0	0	0	1	0	0	0	0
1292	COL6A2	ID/DD SCZ	5	nonsynonymous SNV,synonymous SNV	21q22.3	collagen type VI alpha 2 chain	protein-coding	0	0	0	0	0	0	0	0	0	0	0	0	0	0	0	0	0	0	0	0	0	0	0
10880	ACTL7B	ID/DD SCZ	2	nonsynonymous SNV,synonymous SNV	9q31.3	actin like 7B	protein-coding	0	0	0	0	0	0	0	0	0	0	0	0	0	0	0	0	0	0	0	0	0	0	0
440279	UNC13C	ID/DD SCZ	2	nonsynonymous SNV	15q21.3	unc-13 homolog C	protein-coding	0	0	0	0	0	0	1	0	1	0	0	0	1	0	0	1	0	0	0	0	0	0	0
93145	OLFM2	ID/DD SCZ	2	synonymous SNV,nonsynonymous SNV	19p13.2	olfactomedin 2	protein-coding	0	0	0	0	0	0	0	0	1	0	0	0	0	0	0	0	0	0	0	0	0	0	1
91151	TIGD7	ID/DD SCZ	2	nonsynonymous SNV	16p13.3	tigger transposable element derived 7	protein-coding	0	0	0	0	0	0	0	0	0	0	0	0	0	0	0	0	0	0	0	0	0	0	0
6561	SLC13A1	ID/DD SCZ	3	nonsynonymous SNV,synonymous SNV	7q31.32	solute carrier family 13 member 1	protein-coding	0	0	0	0	0	0	0	0	0	0	0	0	1	0	0	0	0	0	0	0	0	0	0
22872	SEC31A	ID/DD SCZ	5	nonsynonymous SNV,stopgain	4q21.22	SEC31 homolog A, COPII coat complex component	protein-coding	1	0	0	0	0	0	0	1	0	0	0	0	0	0	0	0	0	1	0	0	0	0	0
116985	ARAP1	ID/DD SCZ	2	nonsynonymous SNV	11q13.4	ArfGAP with RhoGAP domain, ankyrin repeat and PH domain 1	protein-coding	0	0	0	0	0	1	0	1	0	0	0	0	0	0	0	0	0	0	0	0	0	0	0
214	ALCAM	ID/DD SCZ	2	nonsynonymous SNV,synonymous SNV	3q13.11	activated leukocyte cell adhesion molecule	protein-coding	0	0	0	0	1	0	0	1	0	0	0	0	0	0	0	0	0	0	0	0	0	0	1
6935	ZEB1	ID/DD SCZ	2	stopgain,nonsynonymous SNV	10p11.22	zinc finger E-box binding homeobox 1	protein-coding	0	1	1	0	0	0	0	0	0	0	0	0	1	0	0	0	0	0	1	0	0	0	1
9379	NRXN2	ID/DD SCZ	3	synonymous SNV,nonsynonymous SNV	11q13.1	neurexin 2	protein-coding	0	1	0	0	1	0	1	0	0	0	0	0	0	0	0	0	0	0	1	0	0	0	1
729767	CEACAM18	ID/DD SCZ	2	nonsynonymous SNV	19q13.41	carcinoembryonic antigen related cell adhesion molecule 18	protein-coding	0	0	0	0	0	0	0	0	0	0	0	0	0	0	0	0	0	0	0	0	0	0	0
6830	SUPT6H	ID/DD SCZ	4	nonsynonymous SNV	17q11.2	SPT6 homolog, histone chaperone	protein-coding	1	0	0	0	0	0	1	0	0	0	0	0	0	0	0	0	1	0	0	0	0	0	1
57096	RPGRIP1	ID/DD SCZ	2	synonymous SNV,nonsynonymous SNV	14q11.2	RPGR interacting protein 1	protein-coding	0	0	0	0	0	0	0	0	0	0	0	0	0	0	0	0	0	0	1	0	0	0	0
1659	DHX8	ID/DD SCZ	2	nonsynonymous SNV	17q21.31	DEAH-box helicase 8	protein-coding	1	0	0	0	0	0	0	0	0	0	0	0	0	0	0	0	0	1	0	0	0	0	1
1768	DNAH6	ID/DD SCZ	4	synonymous SNV,nonsynonymous SNV	2p11.2	dynein axonemal heavy chain 6	protein-coding	0	0	0	0	0	0	0	0	0	0	0	0	0	0	0	0	0	0	0	0	0	0	0
3632	INPP5A	ID/DD SCZ	2	nonsynonymous SNV,synonymous SNV	10q26.3	inositol polyphosphate-5-phosphatase A	protein-coding	1	1	0	0	0	0	0	0	0	0	0	0	0	0	0	0	0	0	0	0	0	0	1
23261	CAMTA1	ID/DD SCZ	6	synonymous SNV,frameshift deletion,nonsynonymous SNV	1p36.31-p36.23	calmodulin binding transcription activator 1	protein-coding	1	0	0	0	0	0	1	1	0	0	0	0	0	0	0	0	0	0	1	0	0	0	1
2201	FBN2	ID/DD SCZ	6	synonymous SNV,frameshift insertion,nonsynonymous SNV	5q23.3	fibrillin 2	protein-coding	0	0	0	0	0	0	0	0	0	0	0	0	1	0	0	0	0	0	0	0	0	0	1
54832	VPS13C	ID/DD SCZ	2	frameshift deletion,synonymous SNV	15q22.2	vacuolar protein sorting 13 homolog C	protein-coding	0	0	0	0	0	0	0	1	0	0	0	0	0	0	0	0	0	0	0	0	0	0	0
3301	DNAJA1	ID/DD SCZ	2	nonsynonymous SNV,splice-site mutation	9p21.1	DnaJ heat shock protein family (Hsp40) member A1	protein-coding	0	0	0	0	0	0	0	0	1	0	0	0	0	0	0	0	0	0	0	0	0	0	0
5917	RARS	ID/DD SCZ	2	synonymous SNV,nonsynonymous SNV	5q34	arginyl-tRNA synthetase	protein-coding	1	0	0	0	0	0	0	0	0	0	0	0	0	0	0	0	0	1	0	0	0	0	0
5371	PML	ID/DD SCZ	3	nonsynonymous SNV	15q24.1	promyelocytic leukemia	protein-coding	0	0	0	0	0	0	0	0	0	0	0	0	0	0	0	0	0	0	0	0	0	0	1
64760	FAM160B2	ID/DD SCZ	3	nonsynonymous SNV,synonymous SNV	8p21.3	family with sequence similarity 160 member B2	protein-coding	1	0	0	0	0	0	0	0	0	0	0	0	0	0	0	0	0	0	0	0	0	0	0
54084	TSPEAR	ID/DD SCZ	3	nonsynonymous SNV,synonymous SNV,frameshift insertion	21q22.3	thrombospondin type laminin G domain and EAR repeats	protein-coding	0	0	0	0	0	0	0	0	0	0	0	0	0	0	0	0	0	0	0	0	0	0	0
3938	LCT	ID/DD SCZ	3	nonsynonymous SNV,synonymous SNV	2q21.3	lactase	protein-coding	0	0	0	0	0	0	0	0	0	0	0	0	0	0	0	0	0	0	0	0	0	0	0
285590	SH3PXD2B	ID/DD SCZ	2	synonymous SNV,nonsynonymous SNV	5q35.1	SH3 and PX domains 2B	protein-coding	0	1	0	0	0	1	0	0	0	0	0	0	0	0	0	0	0	1	1	0	0	0	0
317703	VN1R4	ID/DD SCZ	2	nonsynonymous SNV	19q13.42	vomeronasal 1 receptor 4	protein-coding	0	0	0	0	0	0	0	0	0	0	0	0	0	0	0	0	0	0	0	0	0	0	0
409	ARRB2	ID/DD SCZ	4	synonymous SNV,nonsynonymous SNV	17p13.2	arrestin beta 2	protein-coding	0	0	0	0	0	0	0	0	0	0	0	0	1	0	0	0	0	0	0	0	0	0	0
64061	TSPYL2	ID/DD SCZ	3	nonsynonymous SNV	Xp11.22	TSPY like 2	protein-coding	0	0	0	0	0	0	0	0	0	0	0	0	0	0	0	0	0	0	0	0	0	0	0
25914	RTTN	ID/DD SCZ	4	frameshift deletion,nonsynonymous SNV,synonymous SNV	18q22.2	rotatin	protein-coding	0	1	0	0	0	0	0	0	0	0	0	0	0	0	0	0	0	0	0	0	0	0	0
283848	CES4A	ID/DD SCZ	2	nonsynonymous SNV	16q22.1	carboxylesterase 4A	protein-coding	0	0	0	0	0	0	0	0	0	0	0	0	0	0	0	0	0	0	0	0	0	0	0
3363	HTR7	ID/DD SCZ	2	nonsynonymous SNV	10q23.31	5-hydroxytryptamine receptor 7	protein-coding	0	0	0	0	0	0	0	0	0	0	0	0	1	0	0	0	0	0	0	0	0	0	0
10125	RASGRP1	ID/DD SCZ	2	nonsynonymous SNV	15q14	RAS guanyl releasing protein 1	protein-coding	0	0	0	0	0	0	1	0	0	0	0	0	0	0	0	0	0	0	0	0	0	0	0
8714	ABCC3	ID/DD SCZ	3	synonymous SNV,frameshift deletion,nonsynonymous SNV	17q21.33	ATP binding cassette subfamily C member 3	protein-coding	0	0	0	0	0	0	0	0	0	0	0	0	1	0	0	0	0	0	0	0	0	0	0
6668	SP2	ID/DD SCZ	2	synonymous SNV	17q21.32	Sp2 transcription factor	protein-coding	0	1	1	0	0	0	0	0	0	0	0	0	0	0	0	0	0	0	0	0	0	0	1
8412	BCAR3	ID/DD SCZ	3	synonymous SNV,nonsynonymous SNV	1p22.1	BCAR3, NSP family adaptor protein	protein-coding	0	0	0	0	0	0	0	0	0	0	0	0	0	0	0	0	0	0	0	0	0	0	1
4843	NOS2	ID/DD SCZ	3	nonsynonymous SNV,synonymous SNV,nonframeshift deletion	17q11.2	nitric oxide synthase 2	protein-coding	0	0	0	0	0	0	0	0	0	0	0	0	1	0	1	0	0	0	0	0	0	0	0
84658	ADGRE3	ID/DD SCZ	2	nonsynonymous SNV	19p13.12	adhesion G protein-coupled receptor E3	protein-coding	0	0	0	0	0	0	0	0	0	0	0	0	0	0	0	0	0	0	0	0	0	0	0
60385	TSKS	ID/DD SCZ	2	nonsynonymous SNV	19q13.33	testis specific serine kinase substrate	protein-coding	0	0	0	0	0	0	0	0	0	0	0	0	0	0	0	0	0	0	0	0	0	0	1
23129	PLXND1	ID/DD SCZ	3	synonymous SNV,nonsynonymous SNV	3q22.1	plexin D1	protein-coding	0	1	0	0	0	0	1	0	0	0	0	0	0	0	0	0	0	0	0	0	0	0	1
126133	ALDH16A1	ID/DD SCZ	2	nonsynonymous SNV,synonymous SNV	19q13.33	aldehyde dehydrogenase 16 family member A1	protein-coding	0	0	0	0	0	0	0	0	0	0	0	0	0	0	0	0	0	0	0	0	0	0	0
29904	EEF2K	ID/DD SCZ	3	nonsynonymous SNV,synonymous SNV	16p12.2	eukaryotic elongation factor 2 kinase	protein-coding	0	0	0	0	0	0	0	0	0	0	0	0	0	0	0	0	0	0	0	0	0	0	0
64285	RHBDF1	ID/DD SCZ	2	nonsynonymous SNV	16p13.3	rhomboid 5 homolog 1	protein-coding	0	0	0	0	0	0	0	1	0	0	0	0	0	0	0	0	0	0	0	0	0	0	0
3655	ITGA6	ID/DD SCZ	2	nonframeshift deletion,synonymous SNV	2q31.1	integrin subunit alpha 6	protein-coding	0	1	0	0	1	0	0	0	0	0	0	0	0	0	0	0	0	0	1	0	0	0	0
56165	TDRD1	ID/DD SCZ	2	nonsynonymous SNV	10q25.3	tudor domain containing 1	protein-coding	0	0	0	0	0	0	0	0	0	0	0	0	0	0	0	0	1	0	0	0	0	0	1
85461	TANC1	ID/DD SCZ	3	nonsynonymous SNV	2q24.2	tetratricopeptide repeat, ankyrin repeat and coiled-coil containing 1	protein-coding	0	0	0	0	0	0	0	0	0	0	0	0	1	0	0	0	0	0	0	0	0	0	0
2736	GLI2	ID/DD SCZ	2	nonsynonymous SNV	2q14.2	GLI family zinc finger 2	protein-coding	0	1	1	0	0	0	0	0	0	0	0	0	1	0	0	0	0	0	1	0	0	0	1
51517	NCKIPSD	ID/DD SCZ	2	frameshift deletion,nonsynonymous SNV	3p21.31	NCK interacting protein with SH3 domain	protein-coding	1	0	0	0	0	0	0	0	1	0	0	0	0	0	0	0	0	0	0	0	0	0	0
9445	ITM2B	ID/DD SCZ	2	nonframeshift insertion,synonymous SNV	13q14.2	integral membrane protein 2B	protein-coding	1	0	0	0	0	0	0	0	0	0	0	0	1	1	0	0	0	0	0	0	0	0	0
92714	ARRDC1	ID/DD SCZ	2	nonframeshift insertion,synonymous SNV	9q34.3	arrestin domain containing 1	protein-coding	0	0	0	0	0	0	0	0	0	0	0	0	0	0	0	0	0	0	0	0	0	0	0
2308	FOXO1	ID/DD SCZ	2	synonymous SNV,nonsynonymous SNV	13q14.11	forkhead box O1	protein-coding	0	1	1	0	0	0	0	0	0	0	0	0	0	0	0	0	0	0	0	0	0	0	1
6125	RPL5	ID/DD SCZ	2	nonsynonymous SNV	1p22.1	ribosomal protein L5	protein-coding	0	0	0	0	0	0	0	0	1	0	0	0	0	0	0	0	0	0	0	0	0	0	1
122773	KLHDC1	ID/DD SCZ	2	frameshift deletion,synonymous SNV	14q21.3	kelch domain containing 1	protein-coding	0	0	0	0	0	0	0	0	0	0	0	0	0	0	0	0	0	0	0	0	0	0	0
10178	TENM1	ID/DD SCZ	2	stopgain,nonsynonymous SNV	Xq25	teneurin transmembrane protein 1	protein-coding	0	0	0	0	0	0	0	0	0	0	0	0	0	0	0	0	0	0	0	0	0	0	1
5774	PTPN3	ID/DD SCZ	3	nonsynonymous SNV,synonymous SNV	9q31.3	protein tyrosine phosphatase, non-receptor type 3	protein-coding	0	0	0	0	0	0	0	0	0	0	0	0	0	0	0	0	0	0	0	0	0	0	0
57787	MARK4	ID/DD SCZ	2	splice-site mutation,nonsynonymous SNV	19q13.32	microtubule affinity regulating kinase 4	protein-coding	1	0	0	0	0	0	0	0	0	0	0	0	1	0	0	0	0	0	0	0	0	0	1
79628	SH3TC2	ID/DD SCZ	2	nonsynonymous SNV	5q32	SH3 domain and tetratricopeptide repeats 2	protein-coding	0	0	0	0	0	0	0	0	0	0	0	0	1	0	1	0	0	0	0	0	0	0	0
1207	CLNS1A	ID/DD SCZ	2	nonsynonymous SNV	11q14.1	chloride nucleotide-sensitive channel 1A	protein-coding	1	1	0	0	0	0	0	0	0	0	0	0	0	0	0	0	0	0	0	0	0	0	0
7057	THBS1	ID/DD SCZ	3	nonsynonymous SNV,synonymous SNV	15q14	thrombospondin 1	protein-coding	0	1	0	0	1	0	0	0	0	0	0	0	0	0	0	0	0	0	0	0	0	0	1
375449	MAST4	ID/DD SCZ	3	synonymous SNV,nonsynonymous SNV	5q12.3	microtubule associated serine/threonine kinase family member 4	protein-coding	0	0	0	0	0	0	1	1	0	0	0	0	0	0	0	0	0	0	0	0	0	0	0
4204	MECP2	ID/DD SCZ	17	nonsynonymous SNV,nonframeshift deletion,stopgain,synonymous SNV,frameshift deletion	Xq28	methyl-CpG binding protein 2	protein-coding	1	0	0	0	0	0	0	0	0	0	0	0	1	1	1	0	1	0	1	1	0	1	0
283284	IGSF22	ID/DD SCZ	2	nonsynonymous SNV	11p15.1	immunoglobulin superfamily member 22	protein-coding	0	0	0	0	0	0	0	0	0	0	0	0	0	0	0	0	0	0	0	0	0	0	0
84910	TMEM87B	ID/DD SCZ	2	nonsynonymous SNV	2q13	transmembrane protein 87B	protein-coding	0	0	0	0	0	0	0	0	0	0	0	0	0	0	0	0	0	0	0	0	0	0	0
148113	CILP2	ID/DD SCZ	2	nonsynonymous SNV,synonymous SNV	19p13.11	cartilage intermediate layer protein 2	protein-coding	0	0	0	0	0	0	0	0	0	0	0	0	0	0	0	0	0	0	0	0	0	0	0
255101	CFAP65	ID/DD SCZ	5	nonsynonymous SNV,synonymous SNV	2q35	cilia and flagella associated protein 65	protein-coding	0	0	0	0	0	0	0	0	0	0	0	0	0	0	0	0	0	0	0	0	0	0	0
84447	SYVN1	ID/DD SCZ	2	nonsynonymous SNV,splice-site mutation	11q13.1	synoviolin 1	protein-coding	1	1	0	0	0	0	0	0	0	0	0	0	0	0	0	0	0	0	0	0	0	0	1
8294	HIST1H4I	ID/DD SCZ	3	nonsynonymous SNV,synonymous SNV	6p22.1	histone cluster 1 H4 family member i	protein-coding	0	0	0	0	0	0	0	0	0	0	0	0	0	0	0	0	0	1	0	0	0	0	0
22983	MAST1	ID/DD SCZ	3	synonymous SNV,nonsynonymous SNV	19p13.13	microtubule associated serine/threonine kinase 1	protein-coding	0	0	0	0	0	0	1	0	0	0	0	0	0	0	0	0	0	0	0	0	0	0	1
1514	CTSL	ID/DD SCZ	2	synonymous SNV,nonsynonymous SNV	9q21.33	cathepsin L	protein-coding	0	1	0	0	0	0	0	0	0	0	0	0	0	0	0	0	0	0	0	0	0	0	0
10994	ILVBL	ID/DD SCZ	3	nonsynonymous SNV,stopgain	19p13.12	ilvB acetolactate synthase like	protein-coding	1	0	0	0	0	0	0	0	0	0	0	0	0	0	0	0	0	0	0	0	0	0	0
4810	NHS	ID/DD SCZ	2	nonsynonymous SNV,nonframeshift deletion	Xp22.2-p22.13	NHS actin remodeling regulator	protein-coding	0	0	0	0	0	0	0	0	0	0	0	0	0	0	0	0	0	0	1	0	0	0	1
85460	ZNF518B	ID/DD SCZ	2	nonsynonymous SNV,nonframeshift deletion	4p16.1	zinc finger protein 518B	protein-coding	0	0	0	0	0	0	0	0	0	0	0	0	0	0	0	0	0	0	0	0	0	0	0
7916	PRRC2A	ID/DD SCZ	2	frameshift deletion,nonsynonymous SNV	6p21.33	proline rich coiled-coil 2A	protein-coding	1	0	0	0	0	0	1	0	0	0	0	0	0	0	0	0	0	1	0	0	0	0	1
3064	HTT	ID/DD SCZ	2	synonymous SNV,nonsynonymous SNV	4p16.3	huntingtin	protein-coding	1	1	0	0	0	0	1	0	0	0	0	0	1	0	0	0	0	0	0	0	0	0	1
403313	PLPP6	ID/DD SCZ	2	nonframeshift deletion,nonsynonymous SNV	9p24.1	phospholipid phosphatase 6	protein-coding	0	0	0	0	0	0	0	0	0	0	0	0	0	0	0	0	0	0	0	0	0	0	0
343641	TGM6	ID/DD SCZ	2	nonsynonymous SNV	20p13	transglutaminase 6	protein-coding	0	0	0	0	0	0	0	0	0	0	0	0	0	0	0	0	0	0	0	0	0	0	0
3383	ICAM1	ID/DD SCZ	3	frameshift deletion,synonymous SNV	19p13.2	intercellular adhesion molecule 1	protein-coding	0	0	0	0	1	0	0	0	0	0	0	0	0	0	0	0	0	0	0	0	0	0	0
283659	PRTG	ID/DD SCZ	2	nonsynonymous SNV	15q21.3	protogenin	protein-coding	0	0	0	0	1	0	0	0	0	0	0	0	0	0	0	0	0	0	0	0	0	0	0
4214	MAP3K1	ID/DD SCZ	3	synonymous SNV,nonsynonymous SNV,stopgain	5q11.2	mitogen-activated protein kinase kinase kinase 1	protein-coding	0	0	0	0	0	0	0	0	0	0	0	0	1	0	0	0	0	0	1	0	0	0	1
161	AP2A2	ID/DD SCZ	2	nonsynonymous SNV	11p15.5	adaptor related protein complex 2 alpha 2 subunit	protein-coding	1	0	0	0	0	0	1	0	1	0	0	0	0	0	0	0	0	0	0	0	0	0	1
286077	FAM83H	ID/DD SCZ	4	synonymous SNV,nonsynonymous SNV	8q24.3	family with sequence similarity 83 member H	protein-coding	0	0	0	0	0	0	0	0	0	0	0	0	0	0	0	0	0	0	0	0	0	0	0
55083	KIF26B	ID/DD SCZ	2	synonymous SNV,nonsynonymous SNV	1q44	kinesin family member 26B	protein-coding	0	1	0	0	0	0	0	0	0	0	0	0	0	0	0	0	0	0	0	0	0	0	1
91526	ANKRD44	ID/DD SCZ	2	synonymous SNV,nonsynonymous SNV	2q33.1	ankyrin repeat domain 44	protein-coding	0	0	0	0	0	0	0	0	0	0	0	0	0	0	0	0	0	1	0	0	0	0	0
6689	SPIB	ID/DD SCZ	2	nonsynonymous SNV	19q13.33	Spi-B transcription factor	protein-coding	0	0	0	0	0	0	0	0	0	0	0	0	0	0	0	0	0	0	0	0	0	0	0
7126	TNFAIP1	ID/DD SCZ	2	nonsynonymous SNV	17q11.2	TNF alpha induced protein 1	protein-coding	1	0	0	0	0	1	0	0	0	0	0	0	1	0	0	0	0	0	0	0	0	0	0
8218	CLTCL1	ID/DD SCZ	2	nonsynonymous SNV	22q11.21	clathrin heavy chain like 1	protein-coding	0	0	0	0	0	0	0	0	0	0	0	0	0	0	0	0	0	0	0	0	0	0	0
1806	DPYD	ID/DD SCZ	3	stopgain,nonsynonymous SNV	1p21.3	dihydropyrimidine dehydrogenase	protein-coding	0	0	0	0	0	0	0	0	0	0	0	0	0	0	0	0	0	0	0	0	0	0	0
400954	EML6	ID/DD SCZ	3	nonframeshift deletion,nonsynonymous SNV	2p16.1	echinoderm microtubule associated protein like 6	protein-coding	0	0	0	0	0	0	0	0	0	0	0	0	0	0	0	0	0	0	0	0	0	0	0
9733	SART3	ID/DD SCZ	2	synonymous SNV,nonsynonymous SNV	12q23.3	squamous cell carcinoma antigen recognized by T-cells 3	protein-coding	1	0	0	0	0	0	0	0	0	0	0	0	0	0	0	0	0	1	0	0	0	0	1
440073	IQSEC3	ID/DD SCZ	3	nonsynonymous SNV,synonymous SNV	12p13.33	IQ motif and Sec7 domain 3	protein-coding	0	0	0	0	0	0	1	0	1	0	0	0	0	0	0	0	0	0	0	0	0	0	1
153090	DAB2IP	ID/DD SCZ	2	nonsynonymous SNV,synonymous SNV	9q33.2	DAB2 interacting protein	protein-coding	0	0	0	0	0	0	1	0	1	0	0	0	0	0	0	0	0	0	0	0	0	0	1
26000	TBC1D10B	ID/DD SCZ	2	nonsynonymous SNV,synonymous SNV	16p11.2	TBC1 domain family member 10B	protein-coding	0	0	0	0	0	0	0	0	0	0	0	0	0	0	0	0	0	0	0	0	0	0	1
26009	ZZZ3	ID/DD SCZ	2	synonymous SNV,nonsynonymous SNV	1p31.1	zinc finger ZZ-type containing 3	protein-coding	1	0	1	0	0	0	0	0	0	0	0	0	0	0	0	0	0	1	0	0	0	0	1
7011	TEP1	ID/DD SCZ	3	nonsynonymous SNV	14q11.2	telomerase associated protein 1	protein-coding	0	0	0	0	0	0	0	0	0	0	0	0	0	0	0	0	0	0	0	0	0	0	0
83449	PMFBP1	ID/DD SCZ	2	nonsynonymous SNV	16q22.2	polyamine modulated factor 1 binding protein 1	protein-coding	0	0	0	0	0	0	0	0	0	0	0	0	0	0	0	0	0	0	0	0	0	0	0
22984	PDCD11	ID/DD SCZ	3	nonsynonymous SNV,synonymous SNV,stopgain	10q24.33	programmed cell death 11	protein-coding	0	0	0	0	0	0	0	0	0	0	0	0	0	0	0	0	0	1	0	0	0	0	0
91949	COG7	ID/DD SCZ	2	nonsynonymous SNV	16p12.2	component of oligomeric golgi complex 7	protein-coding	1	0	0	0	0	0	0	0	0	0	0	0	0	0	0	0	0	0	1	0	0	0	0
80725	SRCIN1	ID/DD SCZ	2	nonsynonymous SNV,synonymous SNV	17q12	SRC kinase signaling inhibitor 1	protein-coding	0	0	0	0	0	0	1	0	1	0	0	0	0	0	0	0	0	0	0	0	0	0	1
414918	DENND6B	ID/DD SCZ	2	synonymous SNV,nonsynonymous SNV	22q13.33	DENN domain containing 6B	protein-coding	0	0	0	0	0	0	0	0	0	0	0	0	0	0	0	0	0	0	0	0	0	0	0
7486	WRN	ID/DD SCZ	2	nonsynonymous SNV	8p12	Werner syndrome RecQ like helicase	protein-coding	0	1	0	0	0	0	0	0	0	0	0	0	0	0	0	0	0	1	0	0	0	0	0
221393	ADGRF4	ID/DD SCZ	2	nonframeshift substitution,synonymous SNV	6p12.3	adhesion G protein-coupled receptor F4	protein-coding	0	0	0	0	0	0	0	0	0	0	0	0	0	0	0	0	0	0	0	0	0	0	0
80831	APOL5	ID/DD SCZ	3	nonsynonymous SNV,synonymous SNV	22q12.3	apolipoprotein L5	protein-coding	0	0	0	0	0	0	0	0	0	0	0	0	0	0	0	0	0	0	0	0	0	0	0
64137	ABCG4	ID/DD SCZ	2	nonsynonymous SNV	11q23.3	ATP binding cassette subfamily G member 4	protein-coding	0	0	0	0	0	0	0	0	0	0	0	0	0	0	0	0	0	0	0	0	0	0	0
6550	SLC9A3	ID/DD SCZ	3	synonymous SNV,nonsynonymous SNV	5p15.33	solute carrier family 9 member A3	protein-coding	0	0	0	0	0	0	0	0	0	0	0	0	0	0	0	0	0	0	0	0	0	0	1
2720	GLB1	ID/DD SCZ	3	synonymous SNV,nonsynonymous SNV	3p22.3	galactosidase beta 1	protein-coding	0	0	0	0	0	0	0	0	0	0	0	0	1	0	0	0	0	0	1	0	0	0	0
26053	AUTS2	ID/DD SCZ	6	stopgain,frameshift deletion,nonsynonymous SNV	7q11.22	AUTS2, activator of transcription and developmental regulator	protein-coding	0	0	0	0	0	0	1	1	0	0	0	0	0	0	0	0	0	1	0	0	0	0	1
8242	KDM5C	ID/DD SCZ	5	frameshift deletion,nonsynonymous SNV,splice-site mutation	Xp11.22	lysine demethylase 5C	protein-coding	1	0	0	0	0	0	1	0	0	0	0	0	0	0	0	0	1	0	1	0	0	0	1
154743	BMT2	ID/DD SCZ	2	nonsynonymous SNV	7q31.1	base methyltransferase of 25S rRNA 2 homolog	protein-coding	0	0	0	0	0	0	0	0	0	0	0	0	0	0	0	0	0	0	0	0	0	0	1
9343	EFTUD2	ID/DD SCZ	8	nonsynonymous SNV,frameshift insertion,splice-site mutation	17q21.31	elongation factor Tu GTP binding domain containing 2	protein-coding	1	0	0	0	0	0	0	0	0	0	0	0	0	0	0	0	0	1	1	0	0	0	1
84343	HPS3	ID/DD SCZ	2	nonsynonymous SNV	3q24	HPS3, biogenesis of lysosomal organelles complex 2 subunit 1	protein-coding	0	0	0	0	0	0	0	0	0	0	0	0	0	0	0	0	0	0	0	0	0	0	0
9100	USP10	ID/DD SCZ	2	nonsynonymous SNV	16q24.1	ubiquitin specific peptidase 10	protein-coding	1	0	0	0	0	0	0	0	0	0	0	0	0	0	0	0	0	1	0	0	0	0	1
23468	CBX5	ID/DD SCZ	2	nonsynonymous SNV	12q13.13	chromobox 5	protein-coding	1	0	0	0	0	0	0	0	0	0	0	0	0	0	0	0	1	1	0	0	0	0	0
586	BCAT1	ID/DD SCZ	2	frameshift deletion,nonsynonymous SNV	12p12.1	branched chain amino acid transaminase 1	protein-coding	0	0	0	0	0	0	0	0	0	0	0	0	0	0	0	0	0	0	0	0	0	0	0
56479	KCNQ5	ID/DD SCZ	4	nonsynonymous SNV	6q13	potassium voltage-gated channel subfamily Q member 5	protein-coding	0	0	0	0	0	0	0	1	0	0	0	0	0	0	1	0	0	0	1	0	0	0	1
10753	CAPN9	ID/DD SCZ	2	nonsynonymous SNV	1q42.2	calpain 9	protein-coding	0	0	0	0	0	0	0	0	0	0	0	0	0	0	0	0	0	0	0	0	0	0	0
87	ACTN1	ID/DD SCZ	2	nonsynonymous SNV	14q24.1|14q22-q24	actinin alpha 1	protein-coding	0	0	0	0	0	1	0	1	1	0	0	0	0	0	0	0	0	0	0	0	0	0	1
54620	FBXL19	ID/DD SCZ	3	nonsynonymous SNV	16p11.2	F-box and leucine rich repeat protein 19	protein-coding	0	0	0	0	0	0	1	0	0	0	0	0	0	0	0	0	0	0	0	0	0	0	1
9659	PDE4DIP	ID/DD SCZ	5	synonymous SNV,nonsynonymous SNV	1q21.2	phosphodiesterase 4D interacting protein	protein-coding	0	0	0	0	0	0	1	1	0	0	0	0	0	0	0	0	0	0	0	0	0	0	0
54932	EXD3	ID/DD SCZ	3	nonsynonymous SNV,synonymous SNV	9q34.3	exonuclease 3'-5' domain containing 3	protein-coding	0	0	0	0	0	0	0	0	0	0	0	0	0	0	0	0	0	0	0	0	0	0	0
11278	KLF12	ID/DD SCZ	2	nonsynonymous SNV,synonymous SNV	13q22.1	Kruppel like factor 12	protein-coding	0	0	1	0	0	0	0	0	0	0	0	0	0	0	0	0	0	0	0	0	0	0	1
1327	COX4I1	ID/DD SCZ	2	nonsynonymous SNV	16q24.1	cytochrome c oxidase subunit 4I1	protein-coding	1	0	0	0	0	0	0	0	0	0	0	0	0	0	0	0	0	0	0	0	0	0	0
80184	CEP290	ID/DD SCZ	2	nonsynonymous SNV	12q21.32	centrosomal protein 290	protein-coding	0	0	0	0	0	0	0	0	0	0	0	0	0	0	0	0	0	0	1	0	0	0	0
80028	FBXL18	ID/DD SCZ	2	nonsynonymous SNV,synonymous SNV	7p22.1	F-box and leucine rich repeat protein 18	protein-coding	0	0	0	0	0	0	0	0	0	0	0	0	0	0	0	0	0	0	0	0	0	0	0
54801	HAUS6	ID/DD SCZ	2	nonsynonymous SNV	9p22.1	HAUS augmin like complex subunit 6	protein-coding	0	0	0	0	0	0	0	0	0	0	0	0	0	0	0	0	0	1	0	0	0	0	0
56105	PCDHGA11	ID/DD SCZ	3	synonymous SNV,nonsynonymous SNV	5q31.3	protocadherin gamma subfamily A, 11	protein-coding	0	0	0	0	1	0	0	0	0	0	0	0	0	0	0	0	0	0	0	0	0	0	0
26092	TOR1AIP1	ID/DD SCZ	2	nonsynonymous SNV	1q25.2	torsin 1A interacting protein 1	protein-coding	0	1	0	0	0	0	0	0	0	0	0	0	0	0	0	0	0	0	0	0	0	0	0
56889	TM9SF3	ID/DD SCZ	2	nonsynonymous SNV	10q24.1	transmembrane 9 superfamily member 3	protein-coding	1	0	0	0	0	0	0	0	0	0	0	0	0	0	0	0	0	0	0	0	0	0	1
83715	ESPN	ID/DD SCZ	2	nonsynonymous SNV	1p36.31	espin	protein-coding	0	0	0	0	0	1	0	0	0	0	0	0	1	0	1	0	0	0	0	0	0	0	0
57829	ZP4	ID/DD SCZ	2	nonsynonymous SNV	1q43	zona pellucida glycoprotein 4	protein-coding	0	0	0	0	0	0	0	0	0	0	0	0	0	0	0	0	0	0	0	0	0	0	0
60676	PAPPA2	ID/DD SCZ	3	nonsynonymous SNV,synonymous SNV	1q25.2	pappalysin 2	protein-coding	0	0	0	0	0	0	0	0	0	0	0	0	0	0	0	0	0	0	0	0	0	0	0
22899	ARHGEF15	ID/DD SCZ	3	nonsynonymous SNV,frameshift insertion	17p13.1	Rho guanine nucleotide exchange factor 15	protein-coding	0	0	0	0	0	1	0	0	0	0	0	0	0	0	0	0	0	0	0	0	0	0	0
162514	TRPV3	ID/DD SCZ	2	synonymous SNV,nonsynonymous SNV	17p13.2	transient receptor potential cation channel subfamily V member 3	protein-coding	0	0	0	0	0	0	0	0	0	0	0	0	1	0	0	0	0	0	0	0	0	0	0
8994	LIMD1	ID/DD SCZ	2	nonsynonymous SNV,nonframeshift deletion	3p21.31	LIM domains containing 1	protein-coding	0	0	0	0	0	0	0	0	0	0	0	0	0	0	0	0	0	1	0	0	0	0	0
9902	MRC2	ID/DD SCZ	2	nonsynonymous SNV,synonymous SNV	17q23.2	mannose receptor C type 2	protein-coding	0	0	0	0	0	0	0	0	0	0	0	0	0	0	0	0	0	0	0	0	0	0	1
340075	ARSI	ID/DD SCZ	2	synonymous SNV	5q32	arylsulfatase family member I	protein-coding	0	0	0	0	0	0	0	0	0	0	0	0	0	0	0	0	0	0	0	0	0	0	0
10747	MASP2	ID/DD SCZ	2	synonymous SNV,nonsynonymous SNV	1p36.22	mannan binding lectin serine peptidase 2	protein-coding	0	0	0	0	0	0	0	0	0	0	0	0	0	0	0	0	0	0	0	0	0	0	0
85464	SSH2	ID/DD SCZ	3	nonsynonymous SNV,synonymous SNV	17q11.2	slingshot protein phosphatase 2	protein-coding	0	0	0	0	0	0	0	0	0	0	0	0	0	0	0	0	0	1	0	0	0	0	1
10667	FARS2	ID/DD SCZ	2	nonsynonymous SNV	6p25.1	phenylalanyl-tRNA synthetase 2, mitochondrial	protein-coding	1	0	0	0	0	0	0	0	0	0	0	0	0	0	0	0	0	0	0	0	0	0	0
387509	GPR153	ID/DD SCZ	2	nonsynonymous SNV	1p36.31	G protein-coupled receptor 153	protein-coding	0	0	0	0	0	0	0	0	0	0	0	0	0	0	0	0	0	1	0	0	0	0	0
83593	RASSF5	ID/DD SCZ	2	frameshift deletion,synonymous SNV	1q32.1	Ras association domain family member 5	protein-coding	0	0	0	0	0	0	0	0	0	0	0	0	0	0	0	0	0	0	0	0	0	0	0
201625	DNAH12	ID/DD SCZ	2	unknown	3p14.3	dynein axonemal heavy chain 12	protein-coding	0	0	0	0	0	0	0	0	0	0	0	0	0	0	0	0	0	0	0	0	0	0	0
57575	PCDH10	ID/DD SCZ	4	nonsynonymous SNV	4q28.3	protocadherin 10	protein-coding	0	1	0	0	1	0	1	0	0	0	0	0	0	0	0	0	0	0	1	0	0	0	0
11127	KIF3A	ID/DD SCZ	2	synonymous SNV,nonsynonymous SNV	5q31.1	kinesin family member 3A	protein-coding	0	1	0	0	0	0	0	0	0	0	0	0	0	0	0	0	0	0	0	0	0	0	1
10443	N4BP2L2	ID/DD SCZ	2	nonsynonymous SNV	13q13.1	NEDD4 binding protein 2 like 2	protein-coding	1	0	0	0	0	0	0	0	0	0	0	0	0	0	0	0	0	0	0	0	0	0	0
9723	SEMA3E	ID/DD SCZ	2	synonymous SNV	7q21.11	semaphorin 3E	protein-coding	0	0	0	0	1	0	0	0	0	0	0	0	0	0	0	0	0	0	0	0	0	0	0
7275	TUB	ID/DD SCZ	3	nonsynonymous SNV	11p15.4	tubby bipartite transcription factor	protein-coding	0	0	0	0	0	0	0	0	0	0	0	0	1	0	0	0	0	0	0	0	0	0	0
23187	PHLDB1	ID/DD SCZ	4	nonsynonymous SNV	11q23.3	pleckstrin homology like domain family B member 1	protein-coding	0	0	0	0	0	0	1	0	0	0	0	0	0	0	0	0	0	0	0	0	0	0	0
65266	WNK4	ID/DD SCZ	2	synonymous SNV,nonsynonymous SNV	17q21.2	WNK lysine deficient protein kinase 4	protein-coding	0	0	0	0	0	0	0	0	0	0	0	0	0	0	0	0	0	0	0	0	0	0	0
9448	MAP4K4	ID/DD SCZ	6	stopgain,nonsynonymous SNV,splice-site mutation	2q11.2	mitogen-activated protein kinase kinase kinase kinase 4	protein-coding	1	1	0	0	0	0	1	1	1	0	0	0	0	0	0	0	0	0	0	0	0	0	1
286	ANK1	ID/DD SCZ	4	nonsynonymous SNV	8p11.21	ankyrin 1	protein-coding	0	1	0	0	0	0	1	1	1	0	0	0	1	0	0	1	0	0	0	0	0	0	1
3866	KRT15	ID/DD SCZ	2	nonsynonymous SNV	17q21.2	keratin 15	protein-coding	0	0	0	0	0	0	0	0	0	0	0	0	0	0	0	0	0	0	0	0	0	0	0
6520	SLC3A2	ID/DD SCZ	2	nonsynonymous SNV	11q12.3	solute carrier family 3 member 2	protein-coding	0	1	0	0	0	0	0	0	0	0	0	0	0	0	0	0	0	0	0	0	0	0	1
84962	AJUBA	ID/DD SCZ	2	synonymous SNV,nonsynonymous SNV	14q11.2	ajuba LIM protein	protein-coding	0	0	0	0	1	0	0	0	0	0	0	0	0	0	0	0	0	1	0	0	0	0	0
29760	BLNK	ID/DD SCZ	2	stopgain,nonsynonymous SNV	10q24.1	B-cell linker	protein-coding	0	0	0	0	0	0	0	0	1	0	0	0	0	0	0	0	0	0	0	0	0	0	1
85443	DCLK3	ID/DD SCZ	3	synonymous SNV,nonsynonymous SNV	3p22.2	doublecortin like kinase 3	protein-coding	0	0	0	0	0	0	0	0	0	0	0	0	0	0	0	0	0	0	0	0	0	0	0
1496	CTNNA2	ID/DD SCZ	3	nonsynonymous SNV	2p12	catenin alpha 2	protein-coding	0	1	0	0	1	0	0	0	1	0	0	0	1	0	0	0	0	0	0	0	0	0	1
83856	FSD1L	ID/DD SCZ	2	nonsynonymous SNV	9q31.2	fibronectin type III and SPRY domain containing 1 like	protein-coding	0	0	0	0	0	0	0	0	0	0	0	0	0	0	0	0	0	1	0	0	0	0	0
79791	FBXO31	ID/DD SCZ	2	nonsynonymous SNV	16q24.2	F-box protein 31	protein-coding	0	0	0	0	0	0	0	0	1	0	0	0	0	0	0	0	0	0	0	0	0	0	1
255394	TCP11L2	ID/DD SCZ	3	nonsynonymous SNV	12q23.3	t-complex 11 like 2	protein-coding	0	0	0	0	0	0	0	0	0	0	0	0	0	0	0	0	0	0	0	0	0	0	0
1281	COL3A1	ID/DD SCZ	3	nonsynonymous SNV,splice-site mutation	2q32.2	collagen type III alpha 1 chain	protein-coding	0	1	0	0	0	0	0	0	0	0	0	0	0	0	0	0	0	0	0	0	0	0	1
3675	ITGA3	ID/DD SCZ	2	nonsynonymous SNV	17q21.33	integrin subunit alpha 3	protein-coding	0	1	0	0	1	0	0	0	0	0	0	0	0	0	0	0	0	0	1	0	0	0	0
25836	NIPBL	ID/DD SCZ	5	stopgain,nonframeshift deletion,nonsynonymous SNV	5p13.2	NIPBL, cohesin loading factor	protein-coding	1	1	0	0	0	0	0	0	0	0	0	0	1	0	0	0	0	1	1	0	0	0	1
84726	PRRC2B	ID/DD SCZ	3	synonymous SNV,nonsynonymous SNV	9q34.13	proline rich coiled-coil 2B	protein-coding	1	0	0	0	0	0	1	1	0	0	0	0	0	0	0	0	0	0	0	0	0	0	1
3645	INSRR	ID/DD SCZ	3	nonsynonymous SNV	1q23.1	insulin receptor related receptor	protein-coding	0	0	0	0	0	0	0	0	0	0	0	0	0	0	0	0	0	0	0	0	0	0	0
93650	ACP4	ID/DD SCZ	2	nonsynonymous SNV,synonymous SNV	19q13.33	acid phosphatase 4	protein-coding	0	0	0	0	0	0	0	0	0	0	0	0	0	0	0	0	0	0	0	0	0	0	0
158056	MAMDC4	ID/DD SCZ	2	nonsynonymous SNV,synonymous SNV	9q34.3	MAM domain containing 4	protein-coding	0	0	0	0	0	0	0	0	0	0	0	0	0	0	0	0	0	0	0	0	0	0	0
7692	ZNF133	ID/DD SCZ	2	nonsynonymous SNV	20p11.23	zinc finger protein 133	protein-coding	0	0	1	0	0	0	0	0	0	0	0	0	0	0	0	0	0	0	0	0	0	0	1
8720	MBTPS1	ID/DD SCZ	2	nonsynonymous SNV	16q23.3-q24.1	membrane bound transcription factor peptidase, site 1	protein-coding	1	1	0	0	0	0	0	0	0	0	0	0	0	0	0	0	0	0	0	0	0	0	0
26953	RANBP6	ID/DD SCZ	2	nonsynonymous SNV	9p24.1	RAN binding protein 6	protein-coding	1	0	0	0	0	0	0	0	0	0	0	0	0	0	0	0	0	0	0	0	0	0	0
2193	FARSA	ID/DD SCZ	3	nonsynonymous SNV,synonymous SNV	19p13.13	phenylalanyl-tRNA synthetase alpha subunit	protein-coding	1	0	0	0	0	0	0	0	0	0	0	0	0	0	0	0	0	0	0	0	0	0	0
8525	DGKZ	ID/DD SCZ	3	synonymous SNV	11p11.2	diacylglycerol kinase zeta	protein-coding	0	0	0	0	0	0	1	0	1	0	0	0	0	0	0	0	0	0	0	0	0	0	1
113026	PLCD3	BD ID/DD	2	unknown	17q21.31	phospholipase C delta 3	protein-coding	0	0	0	0	0	0	0	0	0	0	0	0	0	0	0	0	0	0	0	0	0	0	0
8642	DCHS1	BD ID/DD	3	nonsynonymous SNV,synonymous SNV	11p15.4	dachsous cadherin-related 1	protein-coding	0	1	0	0	1	0	0	0	1	0	0	0	0	0	0	0	0	1	1	0	0	0	1
10938	EHD1	BD ID/DD	2	stopgain,nonsynonymous SNV	11q13.1	EH domain containing 1	protein-coding	0	1	0	0	0	0	0	0	0	0	0	0	1	0	0	0	0	0	0	0	0	0	0
4009	LMX1A	BD ID/DD	3	synonymous SNV,nonframeshift deletion	1q23.3	LIM homeobox transcription factor 1 alpha	protein-coding	0	1	1	0	0	0	0	0	0	0	0	0	1	0	0	0	0	0	0	0	0	0	1
55619	DOCK10	BD ID/DD	4	nonsynonymous SNV	2q36.2	dedicator of cytokinesis 10	protein-coding	0	0	0	0	0	0	0	0	0	0	0	0	0	0	0	0	0	0	0	0	0	0	0
63922	CHTF18	BD ID/DD	2	nonsynonymous SNV	16p13.3	chromosome transmission fidelity factor 18	protein-coding	0	0	0	0	0	0	0	0	0	0	0	0	0	0	0	0	0	0	0	0	0	0	0
5335	PLCG1	BD ID/DD	2	nonsynonymous SNV,splice-site mutation	20q12	phospholipase C gamma 1	protein-coding	0	1	0	0	0	0	0	0	0	0	0	0	0	0	0	0	0	1	0	0	0	0	0
8549	LGR5	BD ID/DD	2	synonymous SNV	12q21.1	leucine rich repeat containing G protein-coupled receptor 5	protein-coding	0	1	0	0	0	0	0	0	0	0	0	0	1	0	0	0	0	0	0	0	0	0	0
55704	CCDC88A	BD ID/DD	2	nonsynonymous SNV,frameshift deletion	2p16.1	coiled-coil domain containing 88A	protein-coding	0	0	0	0	0	0	0	1	0	0	0	0	0	0	0	0	0	0	0	0	0	0	1
11325	DDX42	BD ID/DD	3	nonsynonymous SNV,synonymous SNV	17q23.3	DEAD-box helicase 42	protein-coding	1	0	0	0	0	0	0	0	0	0	0	0	0	0	0	0	0	0	0	0	0	0	1
3097	HIVEP2	BD ID/DD	6	nonsynonymous SNV,frameshift deletion,stopgain	6q24.2	human immunodeficiency virus type I enhancer binding protein 2	protein-coding	0	0	1	0	0	0	1	1	0	0	0	0	0	0	0	0	0	0	1	0	0	0	1
1185	CLCN6	BD ID/DD	3	nonsynonymous SNV	1p36.22	chloride voltage-gated channel 6	protein-coding	0	0	0	0	0	0	0	0	0	0	0	0	1	0	0	0	0	0	0	0	0	0	0
23049	SMG1	BD ID/DD	2	nonsynonymous SNV	16p12.3	SMG1, nonsense mediated mRNA decay associated PI3K related kinase	protein-coding	0	0	0	0	0	0	1	0	0	0	0	0	0	0	0	0	0	1	0	0	0	0	1
9590	AKAP12	BD ID/DD	2	synonymous SNV,nonsynonymous SNV	6q25.1	A-kinase anchoring protein 12	protein-coding	0	0	0	0	0	0	0	0	0	0	0	0	1	0	0	0	0	0	0	0	0	0	0
51059	FAM135B	BD ID/DD	2	nonsynonymous SNV	8q24.23	family with sequence similarity 135 member B	protein-coding	0	0	0	0	0	0	0	0	0	0	0	0	0	0	0	0	0	0	0	0	0	0	1
Gene ID represents the Entrez ID of genes; Susceptible disease shows different DNMs hit genes which are common in two diseases; Number of mutation indicates the count of DNMs in certain gene; Type of mutation shows the classified items of all DNMs; Human housekeeping genes, involved in basic cell maintenance; Human essential genes, a set of 2,472 human orthologs of essential genes for mouse; Huma…
