# Supplementary material for: De novo Mutations From Whole Exome Sequencing in Neurodevelopmental and Psychiatric Disorders: From Discovery to Application
Source: Front Genet. 2019 Apr 3;10:258. doi: 10.3389/fgene.2019.00258 (PMC6456656; doi:10.3389/fgene.2019.00258)
Supplement: Supplementary file 2 [file Table_2.XLSX]

## Sheet: Supplymentary Table 2
Supplymentary Table 2. Comparison of DNMs distribution across genome in WES studies.
Study	Clinical phenotype*	Probands/Controls	Number of individuals	Sequencing method	Coding DNMs in case	Coding DNMs in control	ncRNA DNMs in case	ncRNA DNMs in control	Intergenic DNMs in case	Intergenic DNMs in control	UTR, Intron, UpDown-stream# DNMs in case	UTR, Intron, UpDown-stream DNMs in control
Vissers et al., (2010)	MR	proband	10	WES	9	0	0	0	0	0	0	0
O’Roak et al., (2011)	ASD	proband	20	WES	9	0	0	0	0	0	5	0
O’Roak et al., (2011)	-	control	20	WES	0	18	0	0	0	0	0	0
Sanders et al., (2012)	ASD	proband	238	WES	169	0	0	0	0	0	1	0
Sanders et al., (2012)	-	control	200	WES	0	122	0	0	0	0	0	0
O’Roak et al., (2012)	ASD	proband	189	WES	238	0	0	0	0	0	1	0
O’Roak et al., (2012)	-	control	31	WES	0	29	0	0	0	0	0	0
Neale et al., (2012)	ASD	proband	175	WES	140	0	0	0	0	0	0	0
Iossifov et al., (2012)	ASD	proband	343	WES	271	0	0	0	0	0	1	0
Iossifov et al., (2012)	-	control	343	WES	0	311	0	7	0	5	0	76
Rauch et al., (2012)	ID	proband	51	WES	86	0	0	0	0	0	2	0
Rauch et al., (2012)	-	control	20	WES	0	27	0	0	0	0	0	0
de Ligt et al., (2012)	ID	proband	100	WES	78	0	0	0	0	0	1	0
Xu et al., (2012)	SCZ	proband	231	WES	117	0	0	0	0	0	0	0
Xu et al., (2012)	-	control	34	WES	0	10	0	0	0	0	0	0
Barcia et al., (2012)	EE	proband	12	WES	10	0	0	0	0	0	0	0
Veeramah et al., (2013)	EE	proband	10	WES	1	0	0	0	0	0	0	0
Gulsuner et al., (2013)	SCZ	proband	105	WES	100	0	0	0	0	0	0	0
Consortium et al., (2013)	EE	proband	264	WES	146	0	0	0	0	0	0	0
Fromer et al., (2014)	SCZ	proband	623	WES	640	0	0	0	0	0	0	0
McCarthy et al., (2014)	SCZ	proband	57	WES	3	0	0	0	0	0	0	0
Takata et al., (2014)	SCZ	proband	231	WES	5	0	0	0	0	0	0	0
Hamdan et al., (2014)	ID	proband	41	WES	80	0	0	0	0	0	1	0
De Rubeis et al., (2014)	ASD	proband	2303	WES	1578	0	3	0	1	0	14	0
Iossifov et al., (2014)	ASD	proband	2500	WES	1942	0	39	0	2	0	476	0
Iossifov et al., (2014)	-	control	1911	WES	0	1349	0	22	0	27	0	293
Guipponi et al., (2014)	SCZ	proband	53	WES	48	0	0	0	0	0	0	0
Krumm et al., (2015)	ASD	proband	2377	WES	73	0	0	0	0	0	0	0
Krumm et al., (2015)	-	control	1786	WES	0	456	0	18	0	14	0	180
Parker et al., (2015)	ID	proband	10	WES	8	0	0	0	0	0	0	0
Kranz et al., (2015)	SCZ	proband	14	WES	4	0	0	0	0	0	0	0
Kun-Rodrigues et al., (2015)	Parkinson early-onset	proband	21	WES	20	0	0	0	0	0	0	0
Hashimoto et al., (2016)	ASD	proband	30	WES	33	0	0	0	0	0	3	0
Helbig et al., (2016)	EE	proband	1131	WES	80	0	0	0	0	0	0	0
Cappi et al., (2016)	OCD	proband	20	WES	25	0	0	0	0	0	1	0
Kataoka et al., (2016)	BD	proband	79	WES	68	0	0	0	0	0	3	0
Halvardson et al., (2016)	ID	proband	39	WES	29	0	0	0	0	0	0	0
Lelieveld et al., (2016)	ID	proband	820	WES	1083	0	0	0	0	0	0	0
Kim et al., (2017)	ADHD	proband	11	WES	6	0	0	0	0	0	0	0
Chen et al., (2017)	ASD	proband	116	WES	121	0	0	0	0	0	6	0
Willsey et al., (2017)	Tourette Disorder	proband	325	WES	453	0	0	0	0	0	0	0
Nishi et al., (2017)	SCZ	proband	18	WES	9	0	0	0	0	0	0	0
* ADHD: Attention-Deficit/Hyperactivity Disorder; ASD: Autism Spectrum Disorder; BD: Bipolar Disorder; ID: intellectual disability; EE: Epilepsy; MD: Mental Retardation; OCD: obsessive-compulsive disorder; SCZ: Schizophrenia.
# UTR, Intron, UpDown-stream represents 5' and 3' untranslated region, intronic region, upstream and downstream flank region of the gene.
