# Supplementary material for: De novo Mutations From Whole Exome Sequencing in Neurodevelopmental and Psychiatric Disorders: From Discovery to Application
Source: Front Genet. 2019 Apr 3;10:258. doi: 10.3389/fgene.2019.00258 (PMC6456656; doi:10.3389/fgene.2019.00258)
Supplement: Supplementary file 3 [file Table_3.XLSX]

## Sheet: Supplymentary Table 3
Supplymentary Table 3. Overview of the network-based methods, including their prediction algorithm basis, characteristic, usage, inputs and data sources.
Tools	Algorithm basis	Characteristic	Usage	Input	Data Source
DAPPLE	Multiple permutation	Significant physical connectivity among proteins encoded for by genes in loci associated to disease according to protein-protein interactions reported in the literature.	Disease pathway identification	List of genes, GWAS SNPs or genomic regions	InWeb
GeneMANIA	Linear regression-based & Label propagation flow	Generating hypotheses about gene function, analyzing gene lists and prioritizing genes for functional assays.	Gene function prediction	List of genes	IRefInde, BioGRID, Omnibus (GEO), InterPro, I2D, IREF-MINT
NETBAG	Greedy heuristic	Candidate networks are assigned a score based on a weighted sum of their edges, representing the likelihood that the respective genes participate in the same genetic phenotype.	Disease pathway identification	De novo CNVs,	BIND, BioGRID, DIP, HPRD, InNetDB, IntAct, BiGG, MINT, MIPS, GO, KEGG, InterPro, TiGER
NETBAG+	Greedy heuristic	Candidate networks are assigned a score based on a weighted sum of their edges, representing the likelihood that the respective genes participate in the same genetic phenotype.	Disease pathway identification	De novo CNVs, de novo SNVs, GWAS SNPs	BIND, BioGRID, DIP, HPRD, InNetDB, IntAct, BiGG, MINT, MIPS, GO, KEGG, InterPro, TiGER
