# Supplementary material for: De novo Mutations From Whole Exome Sequencing in Neurodevelopmental and Psychiatric Disorders: From Discovery to Application
Source: Front Genet. 2019 Apr 3;10:258. doi: 10.3389/fgene.2019.00258 (PMC6456656; doi:10.3389/fgene.2019.00258)
Supplement: Supplementary file 4 [file Table_4.XLSX]

## Sheet: Supplymentary Table 4
Supplymentary Table 4. Comparison of price for WES and WGS on NovaSeq platforms (January 2019).
Flow cell	Read Options	Gb	# of samples/per lane output		Cost/Lane (As of September 2018)			Average price of one sample*
			WES@100X	WGS@30X	UMGCa	UWBCb	YCGAc	WES @100X	WGS @30X
NovaSeq S1	1x100 SR 2x50 PE	75	6	-	5146	5825	7850	1136 ± 234	-
	2x150 PE	225	18	2.5	8222	6690	-	504 ± 60	3072 ± 433
NovaSeq S2	1x100 SR 2x50 PE	160	13	-	9063	10210	13378	940 ± 175	-
	2x150 PE	480	40	5.33	14504	11905	14233	429 ± 36	2632 ± 268
NovaSeq S4	2x150 PE	675	56	7.5	13964	11575	10931	307 ± 29	1711 ± 213
SR: single-end read, PE: paired-end read.
a UMGC: University of Minnesota Genomics Center, data collected from the link “http://genomics.umn.edu/nextgen-novaseq.php”.
b UWBC: Biotechnology Center of University of Wisconsin-Madison, data collected from the link “https://www.biotech.wisc.edu/services/dnaseq/services/Illumina”.
c YCGA: Yale School of Medicine Center for Genome Analysis, data collected from the link “https://www.biotech.wisc.edu/services/dnaseq/services/Illumina”.
* Imputed average price of one sample in one lane output based on the pricing from UMGC, UWBC, and YCGA, including gDNA library prep fee (~$90).
